# Supplementary material for: Regression applied to legal judgments to predict compensation for immaterial damage
Source: PeerJ journal article supplement (doi:10.7717/peerj-cs.1225), 2023-03-23
Supplement: text_regression_in_law_judgments.zip [file text_regression_in_law_judgments.zip]

## Sheet: embeddings
	Unnamed: 0	algorithm	mse	rmse	r2	adj_r2	mae	alg_ab
0	0	air_transport/word2vec_cbow_10000000_100,txt	3.23401e+07	5686.83	0.1395	1.8268	4287.23	word2vec_cbow
1	1	air_transport/word2vec_cbow_10000000_100,txt	3.3697e+07	5804.91	0.1034	1.8614	4391.5	word2vec_cbow
2	2	air_transport/word2vec_cbow_10000000_100,txt	3.45737e+07	5879.94	0.0801	1.8839	4443.1	word2vec_cbow
3	3	air_transport/word2vec_cbow_10000000_100,txt	3.32521e+07	5766.47	0.1152	1.8501	4371.28	word2vec_cbow
4	4	air_transport/word2vec_cbow_10000000_100,txt	3.38716e+07	5819.93	0.0987	1.8659	4401.12	word2vec_cbow
5	5	air_transport/word2vec_cbow_10000000_100,txt	3.44778e+07	5871.78	0.0826	1.8814	4415.02	word2vec_cbow
6	6	air_transport/word2vec_cbow_10000000_100,txt	3.40607e+07	5836.16	0.0937	1.8707	4427.67	word2vec_cbow
7	7	air_transport/word2vec_cbow_10000000_100,txt	3.42603e+07	5853.23	0.0884	1.8758	4398.66	word2vec_cbow
8	8	air_transport/word2vec_cbow_10000000_100,txt	3.47591e+07	5895.68	0.0751	1.8886	4440.72	word2vec_cbow
9	9	air_transport/word2vec_cbow_10000000_100,txt	3.32517e+07	5766.43	0.1152	1.8501	4355.46	word2vec_cbow
10	10	air_transport/word2vec_cbow_10000000_100,txt	3.48054e+07	5899.61	0.0739	1.8898	4425.38	word2vec_cbow
11	11	air_transport/word2vec_cbow_10000000_100,txt	3.40985e+07	5839.39	0.0927	1.8717	4417.77	word2vec_cbow
12	12	air_transport/word2vec_cbow_10000000_100,txt	3.56963e+07	5974.64	0.0502	1.9126	4490.44	word2vec_cbow
13	13	air_transport/word2vec_cbow_10000000_100,txt	3.55673e+07	5963.83	0.0536	1.9093	4474.59	word2vec_cbow
14	14	air_transport/word2vec_cbow_10000000_100,txt	3.35822e+07	5795.01	0.1064	1.8585	4401.13	word2vec_cbow
15	15	air_transport/word2vec_cbow_10000000_100,txt	3.44865e+07	5872.52	0.0824	1.8816	4464.65	word2vec_cbow
16	16	air_transport/word2vec_cbow_10000000_100,txt	3.53166e+07	5942.78	0.0603	1.9029	4456.55	word2vec_cbow
17	17	air_transport/word2vec_cbow_10000000_100,txt	3.36982e+07	5805.02	0.1034	1.8615	4376.67	word2vec_cbow
18	18	air_transport/word2vec_cbow_10000000_100,txt	3.38516e+07	5818.21	0.0993	1.8654	4405.86	word2vec_cbow
19	19	air_transport/word2vec_cbow_10000000_100,txt	3.4294e+07	5856.11	0.0875	1.8767	4396.67	word2vec_cbow
20	20	air_transport/word2vec_cbow_10000000_100,txt	3.4393e+07	5864.56	0.0849	1.8792	4394.29	word2vec_cbow
21	21	air_transport/word2vec_cbow_10000000_100,txt	3.44252e+07	5867.3	0.084	1.8801	4441.36	word2vec_cbow
22	22	air_transport/word2vec_cbow_10000000_100,txt	3.45284e+07	5876.09	0.0813	1.8827	4438	word2vec_cbow
23	23	air_transport/word2vec_cbow_10000000_100,txt	3.50274e+07	5918.39	0.068	1.8955	4451.11	word2vec_cbow
24	24	air_transport/word2vec_cbow_10000000_100,txt	3.48895e+07	5906.74	0.0717	1.8919	4448.78	word2vec_cbow
25	25	air_transport/word2vec_cbow_10000000_100,txt	3.34404e+07	5782.77	0.1102	1.8549	4370.37	word2vec_cbow
26	26	air_transport/word2vec_cbow_10000000_100,txt	3.46425e+07	5885.79	0.0782	1.8856	4454.16	word2vec_cbow
27	27	air_transport/word2vec_cbow_10000000_100,txt	3.40336e+07	5833.83	0.0944	1.8701	4387.46	word2vec_cbow
28	28	air_transport/word2vec_cbow_10000000_100,txt	3.33397e+07	5774.05	0.1129	1.8523	4370.71	word2vec_cbow
29	29	air_transport/word2vec_cbow_10000000_100,txt	3.43998e+07	5865.14	0.0847	1.8794	4422.14	word2vec_cbow
30	30	air_transport/word2vec_cbow_10000000_100,txt	3.38992e+07	5822.3	0.098	1.8666	4381.92	word2vec_cbow
31	31	air_transport/word2vec_cbow_10000000_100,txt	3.4981e+07	5914.48	0.0692	1.8943	4433.12	word2vec_cbow
32	32	air_transport/word2vec_cbow_10000000_100,txt	34267141	5853.81	0.0882	1.876	4409.28	word2vec_cbow
33	33	air_transport/word2vec_cbow_10000000_100,txt	3.49069e+07	5908.2	0.0712	1.8924	4462.6	word2vec_cbow
34	34	air_transport/word2vec_cbow_10000000_100,txt	3.33965e+07	5778.97	0.1114	1.8538	4370.2	word2vec_cbow
35	35	air_transport/word2vec_cbow_10000000_100,txt	3.50975e+07	5924.32	0.0661	1.8972	4433.14	word2vec_cbow
36	36	air_transport/word2vec_cbow_10000000_100,txt	3.41728e+07	5845.75	0.0907	1.8736	4402.35	word2vec_cbow
37	37	air_transport/word2vec_cbow_10000000_100,txt	3.43422e+07	5860.23	0.0862	1.8779	4432.66	word2vec_cbow
38	38	air_transport/word2vec_cbow_10000000_100,txt	3.40889e+07	5838.57	0.093	1.8715	4424	word2vec_cbow
39	39	air_transport/word2vec_cbow_10000000_100,txt	3.27769e+07	5725.11	0.1279	1.8379	4306.53	word2vec_cbow
40	40	air_transport/word2vec_cbow_10000000_100,txt	3.50361e+07	5919.13	0.0678	1.8957	4493.67	word2vec_cbow
41	41	air_transport/word2vec_cbow_10000000_100,txt	3.38645e+07	5819.32	0.0989	1.8657	4416.28	word2vec_cbow
42	42	air_transport/word2vec_cbow_10000000_100,txt	3.51562e+07	5929.27	0.0646	1.8987	4457.4	word2vec_cbow
43	43	air_transport/word2vec_cbow_10000000_100,txt	3.42203e+07	5849.81	0.0895	1.8748	4414.16	word2vec_cbow
44	44	air_transport/word2vec_cbow_10000000_100,txt	3.4491e+07	5872.9	0.0823	1.8817	4428.45	word2vec_cbow
45	45	air_transport/word2vec_cbow_10000000_100,txt	3.38718e+07	5819.95	0.0987	1.8659	4394.57	word2vec_cbow
46	46	air_transport/word2vec_cbow_10000000_100,txt	3.35847e+07	5795.23	0.1064	1.8586	4386.82	word2vec_cbow
47	47	air_transport/word2vec_cbow_10000000_100,txt	3.3931e+07	5825.03	0.0972	1.8674	4381.26	word2vec_cbow
48	48	air_transport/word2vec_cbow_10000000_100,txt	3.34263e+07	5781.55	0.1106	1.8545	4352.65	word2vec_cbow
49	49	air_transport/word2vec_cbow_10000000_100,txt	3.46203e+07	5883.9	0.0788	1.8851	4442.91	word2vec_cbow
0	0	air_transport/word2vec_cbow_10000000_100,txt	3.21334e+07	5668.63	0.1437	1.8227	4565.8	word2vec_cbow
1	1	air_transport/word2vec_cbow_10000000_100,txt	3.15199e+07	5614.26	0.1601	1.807	4514.28	word2vec_cbow
2	2	air_transport/word2vec_cbow_10000000_100,txt	3.26644e+07	5715.27	0.1296	1.8363	4549.23	word2vec_cbow
3	3	air_transport/word2vec_cbow_10000000_100,txt	3.31531e+07	5757.87	0.1166	1.8488	4643.49	word2vec_cbow
4	4	air_transport/word2vec_cbow_10000000_100,txt	3.29234e+07	5737.89	0.1227	1.8429	4639.05	word2vec_cbow
5	5	air_transport/word2vec_cbow_10000000_100,txt	3.27011e+07	5718.49	0.1286	1.8372	4562.94	word2vec_cbow
6	6	air_transport/word2vec_cbow_10000000_100,txt	3.2262e+07	5679.97	0.1403	1.826	4590.62	word2vec_cbow
7	7	air_transport/word2vec_cbow_10000000_100,txt	3.31856e+07	5760.69	0.1157	1.8496	4619.99	word2vec_cbow
8	8	air_transport/word2vec_cbow_10000000_100,txt	3.39556e+07	5827.14	0.0952	1.8693	4685.81	word2vec_cbow
9	9	air_transport/word2vec_cbow_10000000_100,txt	3.21225e+07	5667.67	0.144	1.8224	4564.41	word2vec_cbow
10	10	air_transport/word2vec_cbow_10000000_100,txt	3.26521e+07	5714.2	0.1299	1.836	4601.69	word2vec_cbow
11	11	air_transport/word2vec_cbow_10000000_100,txt	3.34712e+07	5785.43	0.1081	1.8569	4654.49	word2vec_cbow
12	12	air_transport/word2vec_cbow_10000000_100,txt	3.41244e+07	5841.61	0.0907	1.8737	4743.05	word2vec_cbow
13	13	air_transport/word2vec_cbow_10000000_100,txt	3.40041e+07	5831.3	0.0939	1.8706	4689.06	word2vec_cbow
14	14	air_transport/word2vec_cbow_10000000_100,txt	3.27352e+07	5721.47	0.1277	1.8381	4599.32	word2vec_cbow
15	15	air_transport/word2vec_cbow_10000000_100,txt	3.33511e+07	5775.04	0.1113	1.8539	4630.71	word2vec_cbow
16	16	air_transport/word2vec_cbow_10000000_100,txt	3.18423e+07	5642.9	0.1515	1.8152	4494.73	word2vec_cbow
17	17	air_transport/word2vec_cbow_10000000_100,txt	3.4765e+07	5896.18	0.0736	1.8901	4762.88	word2vec_cbow
18	18	air_transport/word2vec_cbow_10000000_100,txt	3.24348e+07	5695.16	0.1357	1.8304	4592.1	word2vec_cbow
19	19	air_transport/word2vec_cbow_10000000_100,txt	3.35606e+07	5793.15	0.1057	1.8592	4658.18	word2vec_cbow
20	20	air_transport/word2vec_cbow_10000000_100,txt	3.31442e+07	5757.1	0.1168	1.8486	4632.96	word2vec_cbow
21	21	air_transport/word2vec_cbow_10000000_100,txt	3.27335e+07	5721.32	0.1277	1.8381	4608.87	word2vec_cbow
22	22	air_transport/word2vec_cbow_10000000_100,txt	3.35457e+07	5791.86	0.1061	1.8588	4644.63	word2vec_cbow
23	23	air_transport/word2vec_cbow_10000000_100,txt	3.34941e+07	5787.41	0.1075	1.8575	4662.43	word2vec_cbow
24	24	air_transport/word2vec_cbow_10000000_100,txt	3.24989e+07	5700.78	0.134	1.832	4562.07	word2vec_cbow
25	25	air_transport/word2vec_cbow_10000000_100,txt	3.34923e+07	5787.25	0.1075	1.8575	4642.17	word2vec_cbow
26	26	air_transport/word2vec_cbow_10000000_100,txt	3.42582e+07	5853.05	0.0871	1.8771	4736.39	word2vec_cbow
27	27	air_transport/word2vec_cbow_10000000_100,txt	3.37095e+07	5805.99	0.1017	1.863	4656.95	word2vec_cbow
28	28	air_transport/word2vec_cbow_10000000_100,txt	3.38953e+07	5821.97	0.0968	1.8678	4700.07	word2vec_cbow
29	29	air_transport/word2vec_cbow_10000000_100,txt	3.31832e+07	5760.48	0.1158	1.8496	4627.46	word2vec_cbow
30	30	air_transport/word2vec_cbow_10000000_100,txt	3.28415e+07	5730.75	0.1249	1.8408	4568.73	word2vec_cbow
31	31	air_transport/word2vec_cbow_10000000_100,txt	3.39218e+07	5824.24	0.0961	1.8685	4721.87	word2vec_cbow
32	32	air_transport/word2vec_cbow_10000000_100,txt	3.41661e+07	5845.18	0.0896	1.8747	4717.44	word2vec_cbow
33	33	air_transport/word2vec_cbow_10000000_100,txt	3.40497e+07	5835.21	0.0927	1.8718	4715.32	word2vec_cbow
34	34	air_transport/word2vec_cbow_10000000_100,txt	3.44606e+07	5870.31	0.0817	1.8823	4737.75	word2vec_cbow
35	35	air_transport/word2vec_cbow_10000000_100,txt	3.28053e+07	5727.59	0.1258	1.8399	4626.52	word2vec_cbow
36	36	air_transport/word2vec_cbow_10000000_100,txt	3.20377e+07	5660.19	0.1463	1.8202	4546.15	word2vec_cbow
37	37	air_transport/word2vec_cbow_10000000_100,txt	3.30999e+07	5753.26	0.118	1.8474	4607.88	word2vec_cbow
38	38	air_transport/word2vec_cbow_10000000_100,txt	3.34784e+07	5786.05	0.1079	1.8571	4623.79	word2vec_cbow
39	39	air_transport/word2vec_cbow_10000000_100,txt	3.24995e+07	5700.84	0.134	1.8321	4557.12	word2vec_cbow
40	40	air_transport/word2vec_cbow_10000000_100,txt	3.33298e+07	5773.2	0.1118	1.8533	4665.35	word2vec_cbow
41	41	air_transport/word2vec_cbow_10000000_100,txt	3.21455e+07	5669.7	0.1434	1.823	4513.93	word2vec_cbow
42	42	air_transport/word2vec_cbow_10000000_100,txt	3.37613e+07	5810.44	0.1004	1.8644	4678.51	word2vec_cbow
43	43	air_transport/word2vec_cbow_10000000_100,txt	3.42299e+07	5850.63	0.0879	1.8764	4676.11	word2vec_cbow
44	44	air_transport/word2vec_cbow_10000000_100,txt	3.26124e+07	5710.73	0.131	1.835	4620.02	word2vec_cbow
45	45	air_transport/word2vec_cbow_10000000_100,txt	3.27781e+07	5725.21	0.1265	1.8392	4577.81	word2vec_cbow
46	46	air_transport/word2vec_cbow_10000000_100,txt	3.36767e+07	5803.16	0.1026	1.8622	4707.85	word2vec_cbow
47	47	air_transport/word2vec_cbow_10000000_100,txt	3.25737e+07	5707.34	0.132	1.834	4606.29	word2vec_cbow
48	48	air_transport/word2vec_cbow_10000000_100,txt	3.27548e+07	5723.18	0.1272	1.8386	4603.61	word2vec_cbow
49	49	air_transport/word2vec_cbow_10000000_100,txt	3.37787e+07	5811.94	0.0999	1.8648	4694.15	word2vec_cbow
0	0	air_transport/word2vec_cbow_10000000_100,txt	3.14942e+07	5611.97	0.1016	1.8631	4253.17	word2vec_cbow
1	1	air_transport/word2vec_cbow_10000000_100,txt	3.01763e+07	5493.3	0.1392	1.827	4176.55	word2vec_cbow
2	2	air_transport/word2vec_cbow_10000000_100,txt	3.08671e+07	5555.81	0.1195	1.846	4237.58	word2vec_cbow
3	3	air_transport/word2vec_cbow_10000000_100,txt	3.10405e+07	5571.4	0.1146	1.8507	4219.51	word2vec_cbow
4	4	air_transport/word2vec_cbow_10000000_100,txt	3.03646e+07	5510.4	0.1338	1.8322	4212.83	word2vec_cbow
5	5	air_transport/word2vec_cbow_10000000_100,txt	3.05732e+07	5529.31	0.1279	1.8379	4202.98	word2vec_cbow
6	6	air_transport/word2vec_cbow_10000000_100,txt	2.92337e+07	5406.82	0.1661	1.8012	4142.94	word2vec_cbow
7	7	air_transport/word2vec_cbow_10000000_100,txt	3.1164e+07	5582.48	0.111	1.8541	4249.22	word2vec_cbow
8	8	air_transport/word2vec_cbow_10000000_100,txt	31308800	5595.43	0.1069	1.8581	4261.84	word2vec_cbow
9	9	air_transport/word2vec_cbow_10000000_100,txt	3.19831e+07	5655.36	0.0877	1.8765	4306.08	word2vec_cbow
10	10	air_transport/word2vec_cbow_10000000_100,txt	3.03284e+07	5507.13	0.1349	1.8312	4167.53	word2vec_cbow
11	11	air_transport/word2vec_cbow_10000000_100,txt	3.1989e+07	5655.88	0.0875	1.8767	4338.32	word2vec_cbow
12	12	air_transport/word2vec_cbow_10000000_100,txt	3.12382e+07	5589.12	0.1089	1.8561	4281.82	word2vec_cbow
13	13	air_transport/word2vec_cbow_10000000_100,txt	2.99132e+07	5469.29	0.1467	1.8198	4160.58	word2vec_cbow
14	14	air_transport/word2vec_cbow_10000000_100,txt	3.133e+07	5597.32	0.1063	1.8586	4280.3	word2vec_cbow
15	15	air_transport/word2vec_cbow_10000000_100,txt	3.12254e+07	5587.97	0.1093	1.8558	4285.88	word2vec_cbow
16	16	air_transport/word2vec_cbow_10000000_100,txt	3.12237e+07	5587.82	0.1093	1.8557	4240.41	word2vec_cbow
17	17	air_transport/word2vec_cbow_10000000_100,txt	3.0275e+07	5502.27	0.1364	1.8297	4213.6	word2vec_cbow
18	18	air_transport/word2vec_cbow_10000000_100,txt	3.22443e+07	5678.41	0.0802	1.8837	4341.33	word2vec_cbow
19	19	air_transport/word2vec_cbow_10000000_100,txt	3.12744e+07	5592.35	0.1079	1.8571	4293.2	word2vec_cbow
20	20	air_transport/word2vec_cbow_10000000_100,txt	3.2307e+07	5683.92	0.0784	1.8854	4295.39	word2vec_cbow
21	21	air_transport/word2vec_cbow_10000000_100,txt	3.18112e+07	5640.14	0.0926	1.8718	4287.3	word2vec_cbow
22	22	air_transport/word2vec_cbow_10000000_100,txt	3.06195e+07	5533.49	0.1266	1.8392	4222.02	word2vec_cbow
23	23	air_transport/word2vec_cbow_10000000_100,txt	2.91273e+07	5396.97	0.1691	1.7983	4117.46	word2vec_cbow
24	24	air_transport/word2vec_cbow_10000000_100,txt	3.08997e+07	5558.75	0.1186	1.8469	4225.06	word2vec_cbow
25	25	air_transport/word2vec_cbow_10000000_100,txt	3.05962e+07	5531.38	0.1272	1.8385	4205.27	word2vec_cbow
26	26	air_transport/word2vec_cbow_10000000_100,txt	3.04207e+07	5515.5	0.1322	1.8337	4203.63	word2vec_cbow
27	27	air_transport/word2vec_cbow_10000000_100,txt	3.10232e+07	5569.85	0.1151	1.8502	4276.82	word2vec_cbow
28	28	air_transport/word2vec_cbow_10000000_100,txt	3.06333e+07	5534.74	0.1262	1.8396	4214.81	word2vec_cbow
29	29	air_transport/word2vec_cbow_10000000_100,txt	3.03676e+07	5510.68	0.1338	1.8323	4160.7	word2vec_cbow
30	30	air_transport/word2vec_cbow_10000000_100,txt	3.23005e+07	5683.35	0.0786	1.8852	4343.59	word2vec_cbow
31	31	air_transport/word2vec_cbow_10000000_100,txt	3.1651e+07	5625.92	0.0971	1.8674	4256.03	word2vec_cbow
32	32	air_transport/word2vec_cbow_10000000_100,txt	3.01636e+07	5492.14	0.1396	1.8267	4202.76	word2vec_cbow
33	33	air_transport/word2vec_cbow_10000000_100,txt	3.02512e+07	5500.11	0.1371	1.8291	4211.78	word2vec_cbow
34	34	air_transport/word2vec_cbow_10000000_100,txt	3.03714e+07	5511.03	0.1336	1.8324	4215.52	word2vec_cbow
35	35	air_transport/word2vec_cbow_10000000_100,txt	3.04918e+07	5521.94	0.1302	1.8357	4226.23	word2vec_cbow
36	36	air_transport/word2vec_cbow_10000000_100,txt	3.14457e+07	5607.64	0.103	1.8618	4221.28	word2vec_cbow
37	37	air_transport/word2vec_cbow_10000000_100,txt	3.07437e+07	5544.7	0.123	1.8426	4209.16	word2vec_cbow
38	38	air_transport/word2vec_cbow_10000000_100,txt	2.99607e+07	5473.64	0.1454	1.8211	4208.65	word2vec_cbow
39	39	air_transport/word2vec_cbow_10000000_100,txt	3.05296e+07	5525.36	0.1291	1.8367	4215.1	word2vec_cbow
40	40	air_transport/word2vec_cbow_10000000_100,txt	3.11794e+07	5583.85	0.1106	1.8545	4319.56	word2vec_cbow
41	41	air_transport/word2vec_cbow_10000000_100,txt	3.20061e+07	5657.39	0.087	1.8772	4284.91	word2vec_cbow
42	42	air_transport/word2vec_cbow_10000000_100,txt	3.06512e+07	5536.35	0.1257	1.84	4239.77	word2vec_cbow
43	43	air_transport/word2vec_cbow_10000000_100,txt	3.0029e+07	5479.88	0.1434	1.823	4178.73	word2vec_cbow
44	44	air_transport/word2vec_cbow_10000000_100,txt	3.06769e+07	5538.67	0.1249	1.8407	4246.86	word2vec_cbow
45	45	air_transport/word2vec_cbow_10000000_100,txt	3.22967e+07	5683.02	0.0787	1.8851	4322.89	word2vec_cbow
46	46	air_transport/word2vec_cbow_10000000_100,txt	3.2229e+07	5677.06	0.0807	1.8833	4320.32	word2vec_cbow
47	47	air_transport/word2vec_cbow_10000000_100,txt	3.06063e+07	5532.29	0.1269	1.8388	4213.53	word2vec_cbow
48	48	air_transport/word2vec_cbow_10000000_100,txt	3.1203e+07	5585.96	0.1099	1.8552	4255.47	word2vec_cbow
49	49	air_transport/word2vec_cbow_10000000_100,txt	3.04151e+07	5514.99	0.1324	1.8336	4205.38	word2vec_cbow
0	0	air_transport/word2vec_cbow_10000000_100,txt	2.24274e+07	4735.76	0.0959	1.8687	3974.35	word2vec_cbow
1	1	air_transport/word2vec_cbow_10000000_100,txt	2.41285e+07	4912.08	0.0273	1.9346	4102.12	word2vec_cbow
2	2	air_transport/word2vec_cbow_10000000_100,txt	2.33771e+07	4834.99	0.0576	1.9055	4066.11	word2vec_cbow
3	3	air_transport/word2vec_cbow_10000000_100,txt	2.35334e+07	4851.12	0.0513	1.9115	4091.8	word2vec_cbow
4	4	air_transport/word2vec_cbow_10000000_100,txt	2.29972e+07	4795.54	0.0729	1.8908	4010.81	word2vec_cbow
5	5	air_transport/word2vec_cbow_10000000_100,txt	2.26257e+07	4756.65	0.0879	1.8764	3963.85	word2vec_cbow
6	6	air_transport/word2vec_cbow_10000000_100,txt	2.34489e+07	4842.41	0.0547	1.9083	4035.4	word2vec_cbow
7	7	air_transport/word2vec_cbow_10000000_100,txt	2.34673e+07	4844.31	0.0539	1.909	4037.95	word2vec_cbow
8	8	air_transport/word2vec_cbow_10000000_100,txt	2.33651e+07	4833.75	0.0581	1.905	4072.07	word2vec_cbow
9	9	air_transport/word2vec_cbow_10000000_100,txt	2.36523e+07	4863.36	0.0465	1.9161	4078.71	word2vec_cbow
10	10	air_transport/word2vec_cbow_10000000_100,txt	2.31028e+07	4806.54	0.0686	1.8948	4039.84	word2vec_cbow
11	11	air_transport/word2vec_cbow_10000000_100,txt	2.41792e+07	4917.23	0.0252	1.9365	4090.77	word2vec_cbow
12	12	air_transport/word2vec_cbow_10000000_100,txt	2.37568e+07	4874.1	0.0423	1.9202	4104.5	word2vec_cbow
13	13	air_transport/word2vec_cbow_10000000_100,txt	2.35288e+07	4850.65	0.0515	1.9113	4103.09	word2vec_cbow
14	14	air_transport/word2vec_cbow_10000000_100,txt	2.34993e+07	4847.61	0.0526	1.9102	4039.5	word2vec_cbow
15	15	air_transport/word2vec_cbow_10000000_100,txt	2.35854e+07	4856.48	0.0492	1.9135	4084.27	word2vec_cbow
16	16	air_transport/word2vec_cbow_10000000_100,txt	2.30433e+07	4800.34	0.071	1.8925	4043.53	word2vec_cbow
17	17	air_transport/word2vec_cbow_10000000_100,txt	2.27647e+07	4771.24	0.0823	1.8817	4036.92	word2vec_cbow
18	18	air_transport/word2vec_cbow_10000000_100,txt	2.45832e+07	4958.14	0.009	1.9522	4134.46	word2vec_cbow
19	19	air_transport/word2vec_cbow_10000000_100,txt	2.35315e+07	4850.93	0.0513	1.9114	4048.62	word2vec_cbow
20	20	air_transport/word2vec_cbow_10000000_100,txt	2.32763e+07	4824.55	0.0616	1.9016	4052.55	word2vec_cbow
21	21	air_transport/word2vec_cbow_10000000_100,txt	2.40556e+07	4904.65	0.0302	1.9317	4116.37	word2vec_cbow
22	22	air_transport/word2vec_cbow_10000000_100,txt	2.23744e+07	4730.16	0.098	1.8666	3962.75	word2vec_cbow
23	23	air_transport/word2vec_cbow_10000000_100,txt	2.34849e+07	4846.12	0.0532	1.9096	4050.35	word2vec_cbow
24	24	air_transport/word2vec_cbow_10000000_100,txt	23036546	4799.64	0.0713	1.8923	4019.62	word2vec_cbow
25	25	air_transport/word2vec_cbow_10000000_100,txt	2.31014e+07	4806.39	0.0687	1.8948	4014.73	word2vec_cbow
26	26	air_transport/word2vec_cbow_10000000_100,txt	2.26786e+07	4762.2	0.0857	1.8784	4021.87	word2vec_cbow
27	27	air_transport/word2vec_cbow_10000000_100,txt	2.28138e+07	4776.38	0.0803	1.8837	4004.17	word2vec_cbow
28	28	air_transport/word2vec_cbow_10000000_100,txt	2.26494e+07	4759.14	0.0869	1.8773	3982.99	word2vec_cbow
29	29	air_transport/word2vec_cbow_10000000_100,txt	2.43713e+07	4936.73	0.0175	1.944	4155.04	word2vec_cbow
30	30	air_transport/word2vec_cbow_10000000_100,txt	2.38522e+07	4883.87	0.0384	1.9239	4092.3	word2vec_cbow
31	31	air_transport/word2vec_cbow_10000000_100,txt	2.37579e+07	4874.21	0.0422	1.9202	4084.24	word2vec_cbow
32	32	air_transport/word2vec_cbow_10000000_100,txt	2.16262e+07	4650.4	0.1282	1.8376	3929.48	word2vec_cbow
33	33	air_transport/word2vec_cbow_10000000_100,txt	2.3444e+07	4841.9	0.0549	1.9081	4018.55	word2vec_cbow
34	34	air_transport/word2vec_cbow_10000000_100,txt	2.32122e+07	4817.91	0.0642	1.8991	4056.24	word2vec_cbow
35	35	air_transport/word2vec_cbow_10000000_100,txt	2.21356e+07	4704.85	0.1076	1.8574	3937.19	word2vec_cbow
36	36	air_transport/word2vec_cbow_10000000_100,txt	2.17132e+07	4659.75	0.1247	1.841	3922.53	word2vec_cbow
37	37	air_transport/word2vec_cbow_10000000_100,txt	2.34022e+07	4837.58	0.0566	1.9064	4088.16	word2vec_cbow
38	38	air_transport/word2vec_cbow_10000000_100,txt	2.31521e+07	4811.66	0.0666	1.8968	4027.87	word2vec_cbow
39	39	air_transport/word2vec_cbow_10000000_100,txt	2.27809e+07	4772.93	0.0816	1.8824	4015.94	word2vec_cbow
40	40	air_transport/word2vec_cbow_10000000_100,txt	2.30833e+07	4804.51	0.0694	1.8941	4018.27	word2vec_cbow
41	41	air_transport/word2vec_cbow_10000000_100,txt	2.34629e+07	4843.86	0.0541	1.9088	4049.22	word2vec_cbow
42	42	air_transport/word2vec_cbow_10000000_100,txt	2.36549e+07	4863.63	0.0464	1.9162	4039.03	word2vec_cbow
43	43	air_transport/word2vec_cbow_10000000_100,txt	2.38044e+07	4878.98	0.0403	1.922	4087.46	word2vec_cbow
44	44	air_transport/word2vec_cbow_10000000_100,txt	2.26388e+07	4758.02	0.0873	1.8769	4005.71	word2vec_cbow
45	45	air_transport/word2vec_cbow_10000000_100,txt	2.36015e+07	4858.14	0.0485	1.9142	4070.22	word2vec_cbow
46	46	air_transport/word2vec_cbow_10000000_100,txt	2.30357e+07	4799.55	0.0713	1.8922	4059.44	word2vec_cbow
47	47	air_transport/word2vec_cbow_10000000_100,txt	2.40779e+07	4906.93	0.0293	1.9326	4096.16	word2vec_cbow
48	48	air_transport/word2vec_cbow_10000000_100,txt	2.30473e+07	4800.76	0.0709	1.8927	4036.97	word2vec_cbow
49	49	air_transport/word2vec_cbow_10000000_100,txt	2.19554e+07	4685.66	0.1149	1.8504	3914.95	word2vec_cbow
0	0	air_transport/word2vec_cbow_10000000_100,txt	3.38199e+07	5815.49	0.0584	1.9047	4037.25	word2vec_cbow
1	1	air_transport/word2vec_cbow_10000000_100,txt	3.36145e+07	5797.8	0.0641	1.8992	3967.94	word2vec_cbow
2	2	air_transport/word2vec_cbow_10000000_100,txt	3.41265e+07	5841.79	0.0499	1.9129	4057.16	word2vec_cbow
3	3	air_transport/word2vec_cbow_10000000_100,txt	3.43046e+07	5857.02	0.0449	1.9176	4099.56	word2vec_cbow
4	4	air_transport/word2vec_cbow_10000000_100,txt	3.33621e+07	5775.99	0.0712	1.8924	4027.49	word2vec_cbow
5	5	air_transport/word2vec_cbow_10000000_100,txt	3.4282e+07	5855.09	0.0456	1.917	4056.08	word2vec_cbow
6	6	air_transport/word2vec_cbow_10000000_100,txt	3.42399e+07	5851.49	0.0467	1.9159	4065.45	word2vec_cbow
7	7	air_transport/word2vec_cbow_10000000_100,txt	3.28623e+07	5732.57	0.0851	1.879	4032.46	word2vec_cbow
8	8	air_transport/word2vec_cbow_10000000_100,txt	3.35206e+07	5789.7	0.0668	1.8966	4045.56	word2vec_cbow
9	9	air_transport/word2vec_cbow_10000000_100,txt	3.42409e+07	5851.57	0.0467	1.9159	4050.06	word2vec_cbow
10	10	air_transport/word2vec_cbow_10000000_100,txt	3.44538e+07	5869.74	0.0408	1.9216	4054.4	word2vec_cbow
11	11	air_transport/word2vec_cbow_10000000_100,txt	3.36832e+07	5803.72	0.0622	1.901	4042.58	word2vec_cbow
12	12	air_transport/word2vec_cbow_10000000_100,txt	3.38115e+07	5814.77	0.0587	1.9044	4029.04	word2vec_cbow
13	13	air_transport/word2vec_cbow_10000000_100,txt	3.41049e+07	5839.94	0.0505	1.9123	4049.66	word2vec_cbow
14	14	air_transport/word2vec_cbow_10000000_100,txt	3.34334e+07	5782.16	0.0692	1.8943	4030.71	word2vec_cbow
15	15	air_transport/word2vec_cbow_10000000_100,txt	3.35453e+07	5791.83	0.0661	1.8973	3997.75	word2vec_cbow
16	16	air_transport/word2vec_cbow_10000000_100,txt	3.41436e+07	5843.25	0.0494	1.9133	4009.62	word2vec_cbow
17	17	air_transport/word2vec_cbow_10000000_100,txt	3.42115e+07	5849.06	0.0475	1.9151	4036.17	word2vec_cbow
18	18	air_transport/word2vec_cbow_10000000_100,txt	3.33835e+07	5777.85	0.0706	1.893	4033.45	word2vec_cbow
19	19	air_transport/word2vec_cbow_10000000_100,txt	3.41603e+07	5844.68	0.0489	1.9138	4061.78	word2vec_cbow
20	20	air_transport/word2vec_cbow_10000000_100,txt	3.30585e+07	5749.65	0.0796	1.8843	3978.58	word2vec_cbow
21	21	air_transport/word2vec_cbow_10000000_100,txt	3.44106e+07	5866.05	0.042	1.9204	4105.06	word2vec_cbow
22	22	air_transport/word2vec_cbow_10000000_100,txt	3.38887e+07	5821.4	0.0565	1.9065	4039.74	word2vec_cbow
23	23	air_transport/word2vec_cbow_10000000_100,txt	3.41608e+07	5844.72	0.0489	1.9138	4051.95	word2vec_cbow
24	24	air_transport/word2vec_cbow_10000000_100,txt	3.33071e+07	5771.23	0.0727	1.8909	4021.92	word2vec_cbow
25	25	air_transport/word2vec_cbow_10000000_100,txt	3.43605e+07	5861.78	0.0434	1.9191	4070.14	word2vec_cbow
26	26	air_transport/word2vec_cbow_10000000_100,txt	3.34598e+07	5784.45	0.0685	1.895	4030.37	word2vec_cbow
27	27	air_transport/word2vec_cbow_10000000_100,txt	3.4189e+07	5847.14	0.0481	1.9145	4052.84	word2vec_cbow
28	28	air_transport/word2vec_cbow_10000000_100,txt	3.3418e+07	5780.83	0.0696	1.8939	4022	word2vec_cbow
29	29	air_transport/word2vec_cbow_10000000_100,txt	3.38626e+07	5819.16	0.0572	1.9058	4084.6	word2vec_cbow
30	30	air_transport/word2vec_cbow_10000000_100,txt	3.3755e+07	5809.91	0.0602	1.9029	4033.79	word2vec_cbow
31	31	air_transport/word2vec_cbow_10000000_100,txt	3.44002e+07	5865.17	0.0423	1.9202	4048.7	word2vec_cbow
32	32	air_transport/word2vec_cbow_10000000_100,txt	3.3781e+07	5812.14	0.0595	1.9036	3996.01	word2vec_cbow
33	33	air_transport/word2vec_cbow_10000000_100,txt	3.41705e+07	5845.55	0.0487	1.914	4067.95	word2vec_cbow
34	34	air_transport/word2vec_cbow_10000000_100,txt	3.33181e+07	5772.18	0.0724	1.8912	4013.96	word2vec_cbow
35	35	air_transport/word2vec_cbow_10000000_100,txt	3.4423e+07	5867.11	0.0416	1.9208	4080.96	word2vec_cbow
36	36	air_transport/word2vec_cbow_10000000_100,txt	3.3342e+07	5774.26	0.0717	1.8919	4032.29	word2vec_cbow
37	37	air_transport/word2vec_cbow_10000000_100,txt	3.44962e+07	5873.35	0.0396	1.9227	4079.26	word2vec_cbow
38	38	air_transport/word2vec_cbow_10000000_100,txt	3.38929e+07	5821.76	0.0564	1.9066	4021.63	word2vec_cbow
39	39	air_transport/word2vec_cbow_10000000_100,txt	3.43132e+07	5857.74	0.0447	1.9178	4039.73	word2vec_cbow
40	40	air_transport/word2vec_cbow_10000000_100,txt	3.38024e+07	5813.99	0.0589	1.9042	4066.62	word2vec_cbow
41	41	air_transport/word2vec_cbow_10000000_100,txt	3.32289e+07	5764.45	0.0749	1.8888	4018.67	word2vec_cbow
42	42	air_transport/word2vec_cbow_10000000_100,txt	3.32677e+07	5767.82	0.0738	1.8899	4000.33	word2vec_cbow
43	43	air_transport/word2vec_cbow_10000000_100,txt	3.39732e+07	5828.66	0.0542	1.9088	4060.98	word2vec_cbow
44	44	air_transport/word2vec_cbow_10000000_100,txt	3.46939e+07	5890.15	0.0341	1.928	4040.28	word2vec_cbow
45	45	air_transport/word2vec_cbow_10000000_100,txt	3.43981e+07	5864.99	0.0423	1.9201	4084	word2vec_cbow
46	46	air_transport/word2vec_cbow_10000000_100,txt	3.40737e+07	5837.26	0.0514	1.9114	4072.04	word2vec_cbow
47	47	air_transport/word2vec_cbow_10000000_100,txt	3.40213e+07	5832.78	0.0528	1.91	4052.12	word2vec_cbow
48	48	air_transport/word2vec_cbow_10000000_100,txt	3.36796e+07	5803.41	0.0623	1.9009	4051.01	word2vec_cbow
49	49	air_transport/word2vec_cbow_10000000_100,txt	33645215	5800.45	0.0633	1.9	4044.16	word2vec_cbow
0	0	air_transport/word2vec_cbow_10000000_100,txt	2.32482e+07	4821.64	0.0788	1.8851	3658.2	word2vec_cbow
1	1	air_transport/word2vec_cbow_10000000_100,txt	2.19873e+07	4689.07	0.1287	1.8371	3610.65	word2vec_cbow
2	2	air_transport/word2vec_cbow_10000000_100,txt	2.17822e+07	4667.15	0.1369	1.8293	3565.21	word2vec_cbow
3	3	air_transport/word2vec_cbow_10000000_100,txt	2.34755e+07	4845.16	0.0698	1.8938	3694.79	word2vec_cbow
4	4	air_transport/word2vec_cbow_10000000_100,txt	2.17451e+07	4663.16	0.1383	1.8279	3561.37	word2vec_cbow
5	5	air_transport/word2vec_cbow_10000000_100,txt	2.23552e+07	4728.13	0.1142	1.8511	3578.46	word2vec_cbow
6	6	air_transport/word2vec_cbow_10000000_100,txt	2.30682e+07	4802.94	0.0859	1.8782	3639.51	word2vec_cbow
7	7	air_transport/word2vec_cbow_10000000_100,txt	2.30373e+07	4799.71	0.0871	1.8771	3685.17	word2vec_cbow
8	8	air_transport/word2vec_cbow_10000000_100,txt	2.18534e+07	4674.76	0.134	1.832	3581.62	word2vec_cbow
9	9	air_transport/word2vec_cbow_10000000_100,txt	2.19874e+07	4689.07	0.1287	1.8371	3540.13	word2vec_cbow
10	10	air_transport/word2vec_cbow_10000000_100,txt	2.34951e+07	4847.18	0.069	1.8945	3691.86	word2vec_cbow
11	11	air_transport/word2vec_cbow_10000000_100,txt	2.2181e+07	4709.67	0.1211	1.8445	3541.78	word2vec_cbow
12	12	air_transport/word2vec_cbow_10000000_100,txt	2.23888e+07	4731.69	0.1128	1.8524	3646.9	word2vec_cbow
13	13	air_transport/word2vec_cbow_10000000_100,txt	2.28161e+07	4776.62	0.0959	1.8686	3644.7	word2vec_cbow
14	14	air_transport/word2vec_cbow_10000000_100,txt	2.27716e+07	4771.95	0.0977	1.867	3626.45	word2vec_cbow
15	15	air_transport/word2vec_cbow_10000000_100,txt	2.21016e+07	4701.23	0.1242	1.8414	3535.68	word2vec_cbow
16	16	air_transport/word2vec_cbow_10000000_100,txt	2.25334e+07	4746.93	0.1071	1.8579	3608.51	word2vec_cbow
17	17	air_transport/word2vec_cbow_10000000_100,txt	2.17657e+07	4665.37	0.1375	1.8287	3596.45	word2vec_cbow
18	18	air_transport/word2vec_cbow_10000000_100,txt	2.23755e+07	4730.28	0.1134	1.8519	3621.6	word2vec_cbow
19	19	air_transport/word2vec_cbow_10000000_100,txt	2.28334e+07	4778.43	0.0952	1.8693	3686.15	word2vec_cbow
20	20	air_transport/word2vec_cbow_10000000_100,txt	2.25201e+07	4745.53	0.1076	1.8574	3610.36	word2vec_cbow
21	21	air_transport/word2vec_cbow_10000000_100,txt	2.29673e+07	4792.43	0.0899	1.8744	3630.57	word2vec_cbow
22	22	air_transport/word2vec_cbow_10000000_100,txt	2.24277e+07	4735.79	0.1113	1.8539	3599.67	word2vec_cbow
23	23	air_transport/word2vec_cbow_10000000_100,txt	2.33088e+07	4827.92	0.0764	1.8874	3717.21	word2vec_cbow
24	24	air_transport/word2vec_cbow_10000000_100,txt	2.23382e+07	4726.33	0.1148	1.8505	3566.07	word2vec_cbow
25	25	air_transport/word2vec_cbow_10000000_100,txt	2.24248e+07	4735.48	0.1114	1.8538	3623.87	word2vec_cbow
26	26	air_transport/word2vec_cbow_10000000_100,txt	2.21831e+07	4709.89	0.121	1.8445	3638.56	word2vec_cbow
27	27	air_transport/word2vec_cbow_10000000_100,txt	2.28028e+07	4775.23	0.0964	1.8681	3657.75	word2vec_cbow
28	28	air_transport/word2vec_cbow_10000000_100,txt	2.24763e+07	4740.92	0.1094	1.8557	3601.78	word2vec_cbow
29	29	air_transport/word2vec_cbow_10000000_100,txt	2.22554e+07	4717.56	0.1181	1.8473	3619.66	word2vec_cbow
30	30	air_transport/word2vec_cbow_10000000_100,txt	2.17851e+07	4667.45	0.1368	1.8294	3561.98	word2vec_cbow
31	31	air_transport/word2vec_cbow_10000000_100,txt	22230069	4714.88	0.1191	1.8463	3611.41	word2vec_cbow
32	32	air_transport/word2vec_cbow_10000000_100,txt	2.22364e+07	4715.55	0.1189	1.8466	3585.97	word2vec_cbow
33	33	air_transport/word2vec_cbow_10000000_100,txt	2.30445e+07	4800.47	0.0868	1.8773	3661.58	word2vec_cbow
34	34	air_transport/word2vec_cbow_10000000_100,txt	2.28748e+07	4782.76	0.0936	1.8709	3585.07	word2vec_cbow
35	35	air_transport/word2vec_cbow_10000000_100,txt	2.22301e+07	4714.88	0.1191	1.8463	3587.65	word2vec_cbow
36	36	air_transport/word2vec_cbow_10000000_100,txt	2.31732e+07	4813.85	0.0817	1.8822	3644	word2vec_cbow
37	37	air_transport/word2vec_cbow_10000000_100,txt	2.27079e+07	4765.28	0.1002	1.8645	3637.12	word2vec_cbow
38	38	air_transport/word2vec_cbow_10000000_100,txt	2.26913e+07	4763.54	0.1008	1.8639	3682.58	word2vec_cbow
39	39	air_transport/word2vec_cbow_10000000_100,txt	2.25231e+07	4745.85	0.1075	1.8575	3666.37	word2vec_cbow
40	40	air_transport/word2vec_cbow_10000000_100,txt	2.27474e+07	4769.42	0.0986	1.866	3567.41	word2vec_cbow
41	41	air_transport/word2vec_cbow_10000000_100,txt	2.17947e+07	4668.48	0.1364	1.8298	3562.75	word2vec_cbow
42	42	air_transport/word2vec_cbow_10000000_100,txt	2.18084e+07	4669.95	0.1358	1.8303	3566.57	word2vec_cbow
43	43	air_transport/word2vec_cbow_10000000_100,txt	2.23593e+07	4728.56	0.114	1.8513	3652.02	word2vec_cbow
44	44	air_transport/word2vec_cbow_10000000_100,txt	2.09136e+07	4573.14	0.1713	1.7962	3480.28	word2vec_cbow
45	45	air_transport/word2vec_cbow_10000000_100,txt	2.20927e+07	4700.29	0.1246	1.8411	3627.72	word2vec_cbow
46	46	air_transport/word2vec_cbow_10000000_100,txt	2.25542e+07	4749.12	0.1063	1.8587	3582.59	word2vec_cbow
47	47	air_transport/word2vec_cbow_10000000_100,txt	2.18738e+07	4676.95	0.1332	1.8328	3550.32	word2vec_cbow
48	48	air_transport/word2vec_cbow_10000000_100,txt	2.25808e+07	4751.93	0.1052	1.8597	3655.31	word2vec_cbow
49	49	air_transport/word2vec_cbow_10000000_100,txt	2.33044e+07	4827.47	0.0765	1.8872	3653.53	word2vec_cbow
0	0	air_transport/word2vec_cbow_10000000_100,txt	2.18432e+07	4673.67	0.077	1.8868	3972.68	word2vec_cbow
1	1	air_transport/word2vec_cbow_10000000_100,txt	2.21481e+07	4706.18	0.0641	1.8992	4009.14	word2vec_cbow
2	2	air_transport/word2vec_cbow_10000000_100,txt	2.10824e+07	4591.55	0.1091	1.8559	3904.28	word2vec_cbow
3	3	air_transport/word2vec_cbow_10000000_100,txt	2.23353e+07	4726.02	0.0562	1.9068	3982.57	word2vec_cbow
4	4	air_transport/word2vec_cbow_10000000_100,txt	2.21327e+07	4704.54	0.0647	1.8986	3940.59	word2vec_cbow
5	5	air_transport/word2vec_cbow_10000000_100,txt	2.22626e+07	4718.33	0.0592	1.9039	3943.43	word2vec_cbow
6	6	air_transport/word2vec_cbow_10000000_100,txt	2.14854e+07	4635.24	0.0921	1.8723	3949.73	word2vec_cbow
7	7	air_transport/word2vec_cbow_10000000_100,txt	2.19362e+07	4683.61	0.073	1.8906	3907.74	word2vec_cbow
8	8	air_transport/word2vec_cbow_10000000_100,txt	2.24983e+07	4743.24	0.0493	1.9134	4002.97	word2vec_cbow
9	9	air_transport/word2vec_cbow_10000000_100,txt	2.12926e+07	4614.39	0.1002	1.8645	3919.07	word2vec_cbow
10	10	air_transport/word2vec_cbow_10000000_100,txt	2.14538e+07	4631.82	0.0934	1.871	3909.09	word2vec_cbow
11	11	air_transport/word2vec_cbow_10000000_100,txt	2.16734e+07	4655.47	0.0841	1.8799	3950.83	word2vec_cbow
12	12	air_transport/word2vec_cbow_10000000_100,txt	2.13495e+07	4620.55	0.0978	1.8668	3936.27	word2vec_cbow
13	13	air_transport/word2vec_cbow_10000000_100,txt	2.17588e+07	4664.63	0.0805	1.8834	3964.3	word2vec_cbow
14	14	air_transport/word2vec_cbow_10000000_100,txt	2.18111e+07	4670.23	0.0783	1.8855	3964.18	word2vec_cbow
15	15	air_transport/word2vec_cbow_10000000_100,txt	2.20579e+07	4696.59	0.0679	1.8956	4007.9	word2vec_cbow
16	16	air_transport/word2vec_cbow_10000000_100,txt	2.1162e+07	4600.22	0.1058	1.8592	3917.22	word2vec_cbow
17	17	air_transport/word2vec_cbow_10000000_100,txt	2.09874e+07	4581.21	0.1131	1.8521	3908.53	word2vec_cbow
18	18	air_transport/word2vec_cbow_10000000_100,txt	2.17863e+07	4667.58	0.0794	1.8845	3982.41	word2vec_cbow
19	19	air_transport/word2vec_cbow_10000000_100,txt	2.14975e+07	4636.54	0.0916	1.8728	3948.43	word2vec_cbow
20	20	air_transport/word2vec_cbow_10000000_100,txt	2.13705e+07	4622.83	0.0969	1.8676	3908.68	word2vec_cbow
21	21	air_transport/word2vec_cbow_10000000_100,txt	2.17661e+07	4665.42	0.0802	1.8837	3921.56	word2vec_cbow
22	22	air_transport/word2vec_cbow_10000000_100,txt	2.17486e+07	4663.54	0.081	1.883	3973.79	word2vec_cbow
23	23	air_transport/word2vec_cbow_10000000_100,txt	2.19785e+07	4688.13	0.0713	1.8923	3936.37	word2vec_cbow
24	24	air_transport/word2vec_cbow_10000000_100,txt	2.21705e+07	4708.55	0.0631	1.9001	3987.2	word2vec_cbow
25	25	air_transport/word2vec_cbow_10000000_100,txt	2.14225e+07	4628.44	0.0948	1.8697	3890.02	word2vec_cbow
26	26	air_transport/word2vec_cbow_10000000_100,txt	2.15657e+07	4643.89	0.0887	1.8756	3935.03	word2vec_cbow
27	27	air_transport/word2vec_cbow_10000000_100,txt	2.16428e+07	4652.19	0.0854	1.8787	3939.63	word2vec_cbow
28	28	air_transport/word2vec_cbow_10000000_100,txt	2.20715e+07	4698.03	0.0673	1.8961	3967.01	word2vec_cbow
29	29	air_transport/word2vec_cbow_10000000_100,txt	2.15398e+07	4641.1	0.0898	1.8745	3915.19	word2vec_cbow
30	30	air_transport/word2vec_cbow_10000000_100,txt	2.16161e+07	4649.31	0.0866	1.8776	3948.57	word2vec_cbow
31	31	air_transport/word2vec_cbow_10000000_100,txt	2.17888e+07	4667.85	0.0793	1.8846	3978.01	word2vec_cbow
32	32	air_transport/word2vec_cbow_10000000_100,txt	2.20271e+07	4693.3	0.0692	1.8943	3977.55	word2vec_cbow
33	33	air_transport/word2vec_cbow_10000000_100,txt	2.09338e+07	4575.35	0.1154	1.8499	3856.89	word2vec_cbow
34	34	air_transport/word2vec_cbow_10000000_100,txt	2.19839e+07	4688.7	0.071	1.8925	3986.73	word2vec_cbow
35	35	air_transport/word2vec_cbow_10000000_100,txt	2.13968e+07	4625.66	0.0958	1.8687	3930.48	word2vec_cbow
36	36	air_transport/word2vec_cbow_10000000_100,txt	2.19374e+07	4683.73	0.073	1.8907	3947.7	word2vec_cbow
37	37	air_transport/word2vec_cbow_10000000_100,txt	2.14928e+07	4636.03	0.0918	1.8726	3944.76	word2vec_cbow
38	38	air_transport/word2vec_cbow_10000000_100,txt	2.15617e+07	4643.46	0.0889	1.8754	3939.45	word2vec_cbow
39	39	air_transport/word2vec_cbow_10000000_100,txt	2.17234e+07	4660.84	0.082	1.882	3921.58	word2vec_cbow
40	40	air_transport/word2vec_cbow_10000000_100,txt	2.05348e+07	4531.54	0.1323	1.8337	3852.93	word2vec_cbow
41	41	air_transport/word2vec_cbow_10000000_100,txt	2.11178e+07	4595.41	0.1076	1.8574	3941.21	word2vec_cbow
42	42	air_transport/word2vec_cbow_10000000_100,txt	2.14583e+07	4632.31	0.0932	1.8712	3951.75	word2vec_cbow
43	43	air_transport/word2vec_cbow_10000000_100,txt	2.24999e+07	4743.4	0.0492	1.9135	3996.91	word2vec_cbow
44	44	air_transport/word2vec_cbow_10000000_100,txt	2.13803e+07	4623.89	0.0965	1.868	3935.11	word2vec_cbow
45	45	air_transport/word2vec_cbow_10000000_100,txt	2.14011e+07	4626.13	0.0957	1.8689	3948.85	word2vec_cbow
46	46	air_transport/word2vec_cbow_10000000_100,txt	2.21804e+07	4709.61	0.0627	1.9005	3983.06	word2vec_cbow
47	47	air_transport/word2vec_cbow_10000000_100,txt	2.16554e+07	4653.54	0.0849	1.8792	3986.02	word2vec_cbow
48	48	air_transport/word2vec_cbow_10000000_100,txt	2.13395e+07	4619.47	0.0983	1.8664	3928.73	word2vec_cbow
49	49	air_transport/word2vec_cbow_10000000_100,txt	2.17917e+07	4668.15	0.0791	1.8847	3983.3	word2vec_cbow
0	0	air_transport/word2vec_cbow_10000000_100,txt	4.00561e+07	6328.99	0.1217	1.8438	4879.73	word2vec_cbow
1	1	air_transport/word2vec_cbow_10000000_100,txt	4.15484e+07	6445.8	0.089	1.8752	4944.5	word2vec_cbow
2	2	air_transport/word2vec_cbow_10000000_100,txt	4.0625e+07	6373.77	0.1093	1.8558	4942.24	word2vec_cbow
3	3	air_transport/word2vec_cbow_10000000_100,txt	4.15134e+07	6443.09	0.0898	1.8745	4989.37	word2vec_cbow
4	4	air_transport/word2vec_cbow_10000000_100,txt	4.14033e+07	6434.54	0.0922	1.8722	4977.43	word2vec_cbow
5	5	air_transport/word2vec_cbow_10000000_100,txt	4.1491e+07	6441.35	0.0903	1.874	5034.24	word2vec_cbow
6	6	air_transport/word2vec_cbow_10000000_100,txt	4.16529e+07	6453.91	0.0867	1.8775	4979.45	word2vec_cbow
7	7	air_transport/word2vec_cbow_10000000_100,txt	4.19258e+07	6475.01	0.0808	1.8832	5019.89	word2vec_cbow
8	8	air_transport/word2vec_cbow_10000000_100,txt	4.0926e+07	6397.34	0.1027	1.8621	4930.9	word2vec_cbow
9	9	air_transport/word2vec_cbow_10000000_100,txt	4.13694e+07	6431.9	0.093	1.8715	4979.11	word2vec_cbow
10	10	air_transport/word2vec_cbow_10000000_100,txt	4.01697e+07	6337.96	0.1193	1.8462	4939.06	word2vec_cbow
11	11	air_transport/word2vec_cbow_10000000_100,txt	4.11596e+07	6415.58	0.0976	1.8671	4952.8	word2vec_cbow
12	12	air_transport/word2vec_cbow_10000000_100,txt	4.11946e+07	6418.31	0.0968	1.8678	4966.32	word2vec_cbow
13	13	air_transport/word2vec_cbow_10000000_100,txt	4.14931e+07	6441.52	0.0902	1.8741	4970.78	word2vec_cbow
14	14	air_transport/word2vec_cbow_10000000_100,txt	3.95485e+07	6288.76	0.1329	1.8331	4867.99	word2vec_cbow
15	15	air_transport/word2vec_cbow_10000000_100,txt	4.13375e+07	6429.42	0.0937	1.8708	4983.25	word2vec_cbow
16	16	air_transport/word2vec_cbow_10000000_100,txt	4.07383e+07	6382.66	0.1068	1.8582	4953.5	word2vec_cbow
17	17	air_transport/word2vec_cbow_10000000_100,txt	4.09458e+07	6398.89	0.1022	1.8626	4890.04	word2vec_cbow
18	18	air_transport/word2vec_cbow_10000000_100,txt	4.17734e+07	6463.23	0.0841	1.88	5009.02	word2vec_cbow
19	19	air_transport/word2vec_cbow_10000000_100,txt	4.16778e+07	6455.84	0.0862	1.878	5006.46	word2vec_cbow
20	20	air_transport/word2vec_cbow_10000000_100,txt	4.11834e+07	6417.43	0.097	1.8676	5002.82	word2vec_cbow
21	21	air_transport/word2vec_cbow_10000000_100,txt	4.01377e+07	6335.43	0.12	1.8455	4901.83	word2vec_cbow
22	22	air_transport/word2vec_cbow_10000000_100,txt	3.95121e+07	6285.86	0.1337	1.8324	4813.89	word2vec_cbow
23	23	air_transport/word2vec_cbow_10000000_100,txt	4.15927e+07	6449.24	0.0881	1.8762	4991.44	word2vec_cbow
24	24	air_transport/word2vec_cbow_10000000_100,txt	4.15852e+07	6448.66	0.0882	1.876	4949.37	word2vec_cbow
25	25	air_transport/word2vec_cbow_10000000_100,txt	4.12334e+07	6421.33	0.0959	1.8686	4976.37	word2vec_cbow
26	26	air_transport/word2vec_cbow_10000000_100,txt	4.15864e+07	6448.75	0.0882	1.876	5008.3	word2vec_cbow
27	27	air_transport/word2vec_cbow_10000000_100,txt	4.02496e+07	6344.25	0.1175	1.8479	4917.61	word2vec_cbow
28	28	air_transport/word2vec_cbow_10000000_100,txt	3.9691e+07	6300.08	0.1298	1.8361	4878.77	word2vec_cbow
29	29	air_transport/word2vec_cbow_10000000_100,txt	4.14413e+07	6437.5	0.0914	1.873	5011.37	word2vec_cbow
30	30	air_transport/word2vec_cbow_10000000_100,txt	4.25767e+07	6525.08	0.0665	1.8969	5018.67	word2vec_cbow
31	31	air_transport/word2vec_cbow_10000000_100,txt	4.10598e+07	6407.79	0.0997	1.865	4952.07	word2vec_cbow
32	32	air_transport/word2vec_cbow_10000000_100,txt	4.28739e+07	6547.82	0.06	1.9032	5083.79	word2vec_cbow
33	33	air_transport/word2vec_cbow_10000000_100,txt	4.18231e+07	6467.08	0.083	1.881	4986.44	word2vec_cbow
34	34	air_transport/word2vec_cbow_10000000_100,txt	4.12411e+07	6421.92	0.0958	1.8688	4944.1	word2vec_cbow
35	35	air_transport/word2vec_cbow_10000000_100,txt	4.21687e+07	6493.74	0.0754	1.8883	5021.68	word2vec_cbow
36	36	air_transport/word2vec_cbow_10000000_100,txt	4.22716e+07	6501.66	0.0732	1.8905	5046.63	word2vec_cbow
37	37	air_transport/word2vec_cbow_10000000_100,txt	4.08084e+07	6388.15	0.1053	1.8597	4944.64	word2vec_cbow
38	38	air_transport/word2vec_cbow_10000000_100,txt	4.13892e+07	6433.45	0.0925	1.8719	4958.6	word2vec_cbow
39	39	air_transport/word2vec_cbow_10000000_100,txt	4.22132e+07	6497.17	0.0745	1.8893	5087.43	word2vec_cbow
40	40	air_transport/word2vec_cbow_10000000_100,txt	4.07773e+07	6385.71	0.1059	1.859	4953.63	word2vec_cbow
41	41	air_transport/word2vec_cbow_10000000_100,txt	4.12381e+07	6421.69	0.0958	1.8687	4957.88	word2vec_cbow
42	42	air_transport/word2vec_cbow_10000000_100,txt	3.97163e+07	6302.09	0.1292	1.8367	4879.95	word2vec_cbow
43	43	air_transport/word2vec_cbow_10000000_100,txt	4.1486e+07	6440.97	0.0904	1.8739	4965.07	word2vec_cbow
44	44	air_transport/word2vec_cbow_10000000_100,txt	4.12363e+07	6421.55	0.0959	1.8687	5002.28	word2vec_cbow
45	45	air_transport/word2vec_cbow_10000000_100,txt	4.07138e+07	6380.74	0.1073	1.8577	4911.04	word2vec_cbow
46	46	air_transport/word2vec_cbow_10000000_100,txt	4.14259e+07	6436.29	0.0917	1.8727	4993.79	word2vec_cbow
47	47	air_transport/word2vec_cbow_10000000_100,txt	4.07041e+07	6379.97	0.1075	1.8575	4943.26	word2vec_cbow
48	48	air_transport/word2vec_cbow_10000000_100,txt	4.18102e+07	6466.08	0.0833	1.8808	5013.05	word2vec_cbow
49	49	air_transport/word2vec_cbow_10000000_100,txt	4.10206e+07	6404.73	0.1006	1.8641	4984.67	word2vec_cbow
0	0	air_transport/glove_100000000_100,txt,txt	3.28251e+07	5729.32	-0.0085	1.969	4223.19	glove
1	1	air_transport/glove_100000000_100,txt,txt	3.10509e+07	5572.33	0.046	1.9166	4240.73	glove
2	2	air_transport/glove_100000000_100,txt,txt	3.21213e+07	5667.56	0.0131	1.9482	4163.22	glove
3	3	air_transport/glove_100000000_100,txt,txt	3.19098e+07	5648.88	0.0196	1.9419	4180.42	glove
4	4	air_transport/glove_100000000_100,txt,txt	3.17605e+07	5635.65	0.0242	1.9375	4206.83	glove
5	5	air_transport/glove_100000000_100,txt,txt	3.05931e+07	5531.1	0.0601	1.9031	4240.1	glove
6	6	air_transport/glove_100000000_100,txt,txt	3.18998e+07	5647.99	0.0199	1.9417	4234.98	glove
7	7	air_transport/glove_100000000_100,txt,txt	3.17492e+07	5634.64	0.0245	1.9372	4200.35	glove
8	8	air_transport/glove_100000000_100,txt,txt	3.0695e+07	5540.31	0.0569	1.9061	4323.32	glove
9	9	air_transport/glove_100000000_100,txt,txt	3.14961e+07	5612.14	0.0323	1.9297	4208.82	glove
10	10	air_transport/glove_100000000_100,txt,txt	3.39569e+07	5827.26	-0.0433	2.0024	4122.37	glove
11	11	air_transport/glove_100000000_100,txt,txt	3.25534e+07	5705.56	-0.0002	1.9609	4181.78	glove
12	12	air_transport/glove_100000000_100,txt,txt	3.52446e+07	5936.72	-0.0828	2.0404	4200.21	glove
13	13	air_transport/glove_100000000_100,txt,txt	3.11752e+07	5583.48	0.0422	1.9203	4242.1	glove
14	14	air_transport/glove_100000000_100,txt,txt	3.11018e+07	5576.9	0.0444	1.9181	4267	glove
15	15	air_transport/glove_100000000_100,txt,txt	3.25434e+07	5704.68	0.0001	1.9606	4179.68	glove
16	16	air_transport/glove_100000000_100,txt,txt	3.15204e+07	5614.3	0.0316	1.9304	4167.18	glove
17	17	air_transport/glove_100000000_100,txt,txt	3.16932e+07	5629.68	0.0263	1.9356	4256.23	glove
18	18	air_transport/glove_100000000_100,txt,txt	3.59045e+07	5992.04	-0.1031	2.0599	4172.05	glove
19	19	air_transport/glove_100000000_100,txt,txt	3.10461e+07	5571.9	0.0461	1.9164	4192.28	glove
20	20	air_transport/glove_100000000_100,txt,txt	3.30996e+07	5753.22	-0.0169	1.9771	4144.86	glove
21	21	air_transport/glove_100000000_100,txt,txt	3.16581e+07	5626.56	0.0273	1.9345	4213.34	glove
22	22	air_transport/glove_100000000_100,txt,txt	3.27646e+07	5724.04	-0.0067	1.9672	4129.68	glove
23	23	air_transport/glove_100000000_100,txt,txt	3.23316e+07	5686.08	0.0067	1.9544	4200.41	glove
24	24	air_transport/glove_100000000_100,txt,txt	3.07377e+07	5544.15	0.0556	1.9073	4262.06	glove
25	25	air_transport/glove_100000000_100,txt,txt	3.09773e+07	5565.73	0.0483	1.9144	4305.32	glove
26	26	air_transport/glove_100000000_100,txt,txt	3.16941e+07	5629.75	0.0262	1.9356	4155.66	glove
27	27	air_transport/glove_100000000_100,txt,txt	3.31976e+07	5761.73	-0.02	1.98	4191.78	glove
28	28	air_transport/glove_100000000_100,txt,txt	3.18525e+07	5643.8	0.0214	1.9403	4213	glove
29	29	air_transport/glove_100000000_100,txt,txt	3.19457e+07	5652.05	0.0185	1.943	4106.89	glove
30	30	air_transport/glove_100000000_100,txt,txt	3.14575e+07	5608.7	0.0335	1.9286	4211.97	glove
31	31	air_transport/glove_100000000_100,txt,txt	3.46889e+07	5889.73	-0.0658	2.024	4197.19	glove
32	32	air_transport/glove_100000000_100,txt,txt	3.06182e+07	5533.37	0.0593	1.9038	4264.16	glove
33	33	air_transport/glove_100000000_100,txt,txt	3.13293e+07	5597.25	0.0374	1.9248	4233.09	glove
34	34	air_transport/glove_100000000_100,txt,txt	3.12654e+07	5591.55	0.0394	1.9229	4290.11	glove
35	35	air_transport/glove_100000000_100,txt,txt	3.03572e+07	5509.74	0.0673	1.8961	4239.49	glove
36	36	air_transport/glove_100000000_100,txt,txt	3.16352e+07	5624.52	0.028	1.9338	4226.86	glove
37	37	air_transport/glove_100000000_100,txt,txt	3.393e+07	5824.95	-0.0425	2.0016	4120.05	glove
38	38	air_transport/glove_100000000_100,txt,txt	3.24397e+07	5695.58	0.0033	1.9576	4090.61	glove
39	39	air_transport/glove_100000000_100,txt,txt	3.13221e+07	5596.61	0.0377	1.9246	4234.02	glove
40	40	air_transport/glove_100000000_100,txt,txt	3.29939e+07	5744.03	-0.0137	1.9739	4163.59	glove
41	41	air_transport/glove_100000000_100,txt,txt	3.11143e+07	5578.02	0.044	1.9185	4192.6	glove
42	42	air_transport/glove_100000000_100,txt,txt	3.11477e+07	5581.01	0.043	1.9194	4234.16	glove
43	43	air_transport/glove_100000000_100,txt,txt	3.18806e+07	5646.29	0.0205	1.9411	4245.92	glove
44	44	air_transport/glove_100000000_100,txt,txt	3.20366e+07	5660.09	0.0157	1.9457	4191.37	glove
45	45	air_transport/glove_100000000_100,txt,txt	3.2136e+07	5668.86	0.0127	1.9486	4182.17	glove
46	46	air_transport/glove_100000000_100,txt,txt	3.21677e+07	5671.66	0.0117	1.9496	4219.51	glove
47	47	air_transport/glove_100000000_100,txt,txt	3.12748e+07	5592.39	0.0391	1.9232	4245.7	glove
48	48	air_transport/glove_100000000_100,txt,txt	3.10729e+07	5574.31	0.0453	1.9172	4260.2	glove
49	49	air_transport/glove_100000000_100,txt,txt	3.14571e+07	5608.66	0.0335	1.9286	4250.29	glove
0	0	air_transport/glove_100000000_100,txt,txt	2.58604e+07	5085.31	0.0842	1.8799	3598.08	glove
1	1	air_transport/glove_100000000_100,txt,txt	2.6949e+07	5191.25	0.0456	1.9169	3743.06	glove
2	2	air_transport/glove_100000000_100,txt,txt	2.71255e+07	5208.21	0.0394	1.9229	3619.94	glove
3	3	air_transport/glove_100000000_100,txt,txt	2.73812e+07	5232.71	0.0303	1.9316	3683.51	glove
4	4	air_transport/glove_100000000_100,txt,txt	2.74951e+07	5243.57	0.0263	1.9355	3646.09	glove
5	5	air_transport/glove_100000000_100,txt,txt	2.77005e+07	5263.13	0.019	1.9425	3722.55	glove
6	6	air_transport/glove_100000000_100,txt,txt	2.71765e+07	5213.11	0.0376	1.9247	3598.27	glove
7	7	air_transport/glove_100000000_100,txt,txt	2.74878e+07	5242.88	0.0266	1.9353	3729.46	glove
8	8	air_transport/glove_100000000_100,txt,txt	2.77773e+07	5270.42	0.0163	1.9451	3697.33	glove
9	9	air_transport/glove_100000000_100,txt,txt	2.66986e+07	5167.07	0.0545	1.9084	3671.32	glove
10	10	air_transport/glove_100000000_100,txt,txt	2.68051e+07	5177.36	0.0507	1.912	3627.62	glove
11	11	air_transport/glove_100000000_100,txt,txt	2.62461e+07	5123.1	0.0705	1.893	3728.99	glove
12	12	air_transport/glove_100000000_100,txt,txt	2.6976e+07	5193.85	0.0447	1.9178	3714.47	glove
13	13	air_transport/glove_100000000_100,txt,txt	2.82743e+07	5317.35	-0.0013	1.962	3693.76	glove
14	14	air_transport/glove_100000000_100,txt,txt	2.75892e+07	5252.55	0.023	1.9387	3712.49	glove
15	15	air_transport/glove_100000000_100,txt,txt	2.75591e+07	5249.67	0.024	1.9377	3659.03	glove
16	16	air_transport/glove_100000000_100,txt,txt	2.65594e+07	5153.58	0.0594	1.9037	3702.52	glove
17	17	air_transport/glove_100000000_100,txt,txt	2.84593e+07	5334.73	-0.0078	1.9683	3677.36	glove
18	18	air_transport/glove_100000000_100,txt,txt	2.7336e+07	5228.39	0.0319	1.9301	3702.47	glove
19	19	air_transport/glove_100000000_100,txt,txt	2.77811e+07	5270.77	0.0162	1.9452	3701.65	glove
20	20	air_transport/glove_100000000_100,txt,txt	2.69537e+07	5191.69	0.0455	1.9171	3700.62	glove
21	21	air_transport/glove_100000000_100,txt,txt	2.89309e+07	5378.75	-0.0245	1.9844	3748.44	glove
22	22	air_transport/glove_100000000_100,txt,txt	2.7348e+07	5229.54	0.0315	1.9305	3720.69	glove
23	23	air_transport/glove_100000000_100,txt,txt	2.77231e+07	5265.27	0.0182	1.9433	3706.65	glove
24	24	air_transport/glove_100000000_100,txt,txt	2.68429e+07	5181.01	0.0494	1.9133	3756.98	glove
25	25	air_transport/glove_100000000_100,txt,txt	2.59947e+07	5098.5	0.0794	1.8845	3668.05	glove
26	26	air_transport/glove_100000000_100,txt,txt	2.88971e+07	5375.6	-0.0233	1.9832	3746.46	glove
27	27	air_transport/glove_100000000_100,txt,txt	2.68206e+07	5178.86	0.0502	1.9126	3771.37	glove
28	28	air_transport/glove_100000000_100,txt,txt	2.8614e+07	5349.21	-0.0133	1.9736	3725.77	glove
29	29	air_transport/glove_100000000_100,txt,txt	2.78568e+07	5277.95	0.0135	1.9478	3677.19	glove
30	30	air_transport/glove_100000000_100,txt,txt	2.59397e+07	5093.1	0.0814	1.8826	3711.21	glove
31	31	air_transport/glove_100000000_100,txt,txt	2.76839e+07	5261.55	0.0196	1.9419	3675.58	glove
32	32	air_transport/glove_100000000_100,txt,txt	2.70482e+07	5200.79	0.0421	1.9203	3752.36	glove
33	33	air_transport/glove_100000000_100,txt,txt	2.74283e+07	5237.2	0.0287	1.9332	3631.8	glove
34	34	air_transport/glove_100000000_100,txt,txt	2.80514e+07	5296.36	0.0066	1.9544	3656.79	glove
35	35	air_transport/glove_100000000_100,txt,txt	2.66215e+07	5159.6	0.0572	1.9058	3682.27	glove
36	36	air_transport/glove_100000000_100,txt,txt	2.75695e+07	5250.66	0.0237	1.938	3715.36	glove
37	37	air_transport/glove_100000000_100,txt,txt	2.79087e+07	5282.87	0.0117	1.9496	3693.79	glove
38	38	air_transport/glove_100000000_100,txt,txt	2.70708e+07	5202.96	0.0413	1.9211	3712.64	glove
39	39	air_transport/glove_100000000_100,txt,txt	2.63234e+07	5130.64	0.0678	1.8956	3592.14	glove
40	40	air_transport/glove_100000000_100,txt,txt	2.66409e+07	5161.48	0.0566	1.9064	3643.23	glove
41	41	air_transport/glove_100000000_100,txt,txt	2.64154e+07	5139.59	0.0645	1.8988	3726.62	glove
42	42	air_transport/glove_100000000_100,txt,txt	2.5736e+07	5073.07	0.0886	1.8757	3604.91	glove
43	43	air_transport/glove_100000000_100,txt,txt	2.6576e+07	5155.2	0.0589	1.9042	3647.05	glove
44	44	air_transport/glove_100000000_100,txt,txt	2.61387e+07	5112.61	0.0743	1.8894	3654.88	glove
45	45	air_transport/glove_100000000_100,txt,txt	2.83324e+07	5322.82	-0.0033	1.964	3717.58	glove
46	46	air_transport/glove_100000000_100,txt,txt	2.72211e+07	5217.38	0.036	1.9262	3688.08	glove
47	47	air_transport/glove_100000000_100,txt,txt	2.68442e+07	5181.14	0.0494	1.9134	3704.44	glove
48	48	air_transport/glove_100000000_100,txt,txt	2.64271e+07	5140.73	0.0641	1.8992	3596.54	glove
49	49	air_transport/glove_100000000_100,txt,txt	2.78344e+07	5275.83	0.0143	1.9471	3754.69	glove
0	0	air_transport/glove_100000000_100,txt,txt	4.12215e+07	6420.4	-0.0335	1.993	4800.89	glove
1	1	air_transport/glove_100000000_100,txt,txt	4.18864e+07	6471.97	-0.0502	2.009	4845.36	glove
2	2	air_transport/glove_100000000_100,txt,txt	4.11396e+07	6414.01	-0.0315	1.991	4777.01	glove
3	3	air_transport/glove_100000000_100,txt,txt	4.05856e+07	6370.68	-0.0176	1.9777	4762.89	glove
4	4	air_transport/glove_100000000_100,txt,txt	4.07228e+07	6381.44	-0.021	1.981	4709.48	glove
5	5	air_transport/glove_100000000_100,txt,txt	4.02108e+07	6341.2	-0.0082	1.9687	4734.13	glove
6	6	air_transport/glove_100000000_100,txt,txt	4.014e+07	6335.61	-0.0064	1.967	4675.35	glove
7	7	air_transport/glove_100000000_100,txt,txt	4.1415e+07	6435.45	-0.0384	1.9977	4766.11	glove
8	8	air_transport/glove_100000000_100,txt,txt	4.15635e+07	6446.97	-0.0421	2.0012	4724.93	glove
9	9	air_transport/glove_100000000_100,txt,txt	4.35927e+07	6602.48	-0.093	2.0501	4875	glove
10	10	air_transport/glove_100000000_100,txt,txt	4.0383e+07	6354.76	-0.0125	1.9728	4771.29	glove
11	11	air_transport/glove_100000000_100,txt,txt	4.34808e+07	6594	-0.0902	2.0474	4847.18	glove
12	12	air_transport/glove_100000000_100,txt,txt	4.06557e+07	6376.18	-0.0194	1.9794	4776.89	glove
13	13	air_transport/glove_100000000_100,txt,txt	4.24222e+07	6513.23	-0.0636	2.0219	4839.64	glove
14	14	air_transport/glove_100000000_100,txt,txt	3.93118e+07	6269.91	0.0143	1.947	4819.91	glove
15	15	air_transport/glove_100000000_100,txt,txt	4.69286e+07	6850.44	-0.1766	2.1305	5061.53	glove
16	16	air_transport/glove_100000000_100,txt,txt	4.24525e+07	6515.56	-0.0644	2.0227	4779.24	glove
17	17	air_transport/glove_100000000_100,txt,txt	4.00232e+07	6326.39	-0.0035	1.9641	4841.61	glove
18	18	air_transport/glove_100000000_100,txt,txt	4.54413e+07	6741.02	-0.1393	2.0947	4965.31	glove
19	19	air_transport/glove_100000000_100,txt,txt	4.00997e+07	6332.44	-0.0054	1.966	4726.86	glove
20	20	air_transport/glove_100000000_100,txt,txt	3.98385e+07	6311.77	0.0011	1.9597	4720.14	glove
21	21	air_transport/glove_100000000_100,txt,txt	4.03457e+07	6351.83	-0.0116	1.9719	4753.66	glove
22	22	air_transport/glove_100000000_100,txt,txt	4.01872e+07	6339.34	-0.0076	1.9681	4774.66	glove
23	23	air_transport/glove_100000000_100,txt,txt	3.92823e+07	6267.56	0.0151	1.9463	4728.41	glove
24	24	air_transport/glove_100000000_100,txt,txt	4.09666e+07	6400.51	-0.0271	1.9869	4834.68	glove
25	25	air_transport/glove_100000000_100,txt,txt	4.33045e+07	6580.61	-0.0858	2.0432	4871.18	glove
26	26	air_transport/glove_100000000_100,txt,txt	4.21235e+07	6490.26	-0.0562	2.0147	4803.65	glove
27	27	air_transport/glove_100000000_100,txt,txt	4.01713e+07	6338.08	-0.0072	1.9677	4697.68	glove
28	28	air_transport/glove_100000000_100,txt,txt	4.05629e+07	6368.9	-0.017	1.9771	4762.36	glove
29	29	air_transport/glove_100000000_100,txt,txt	3.97949e+07	6308.32	0.0022	1.9586	4720.53	glove
30	30	air_transport/glove_100000000_100,txt,txt	3.90805e+07	6251.44	0.0201	1.9414	4671.69	glove
31	31	air_transport/glove_100000000_100,txt,txt	4.27522e+07	6538.52	-0.0719	2.0299	4872.32	glove
32	32	air_transport/glove_100000000_100,txt,txt	3.98917e+07	6315.99	-0.0002	1.961	4650.57	glove
33	33	air_transport/glove_100000000_100,txt,txt	4.35087e+07	6596.12	-0.0909	2.0481	4883.88	glove
34	34	air_transport/glove_100000000_100,txt,txt	4.45861e+07	6677.28	-0.1179	2.0741	4941.22	glove
35	35	air_transport/glove_100000000_100,txt,txt	4.00774e+07	6330.68	-0.0049	1.9654	4772.39	glove
36	36	air_transport/glove_100000000_100,txt,txt	3.91167e+07	6254.34	0.0192	1.9423	4710.88	glove
37	37	air_transport/glove_100000000_100,txt,txt	4.19044e+07	6473.36	-0.0507	2.0095	4899.74	glove
38	38	air_transport/glove_100000000_100,txt,txt	3.93717e+07	6274.68	0.0128	1.9484	4672.81	glove
39	39	air_transport/glove_100000000_100,txt,txt	4.17913e+07	6464.62	-0.0478	2.0067	4813.2	glove
40	40	air_transport/glove_100000000_100,txt,txt	4.04992e+07	6363.9	-0.0154	1.9756	4776.42	glove
41	41	air_transport/glove_100000000_100,txt,txt	4.03585e+07	6352.84	-0.0119	1.9722	4669.95	glove
42	42	air_transport/glove_100000000_100,txt,txt	4.03385e+07	6351.26	-0.0114	1.9717	4746.64	glove
43	43	air_transport/glove_100000000_100,txt,txt	4.38978e+07	6625.54	-0.1006	2.0575	4848.86	glove
44	44	air_transport/glove_100000000_100,txt,txt	4.11255e+07	6412.92	-0.0311	1.9907	4813.01	glove
45	45	air_transport/glove_100000000_100,txt,txt	3.87651e+07	6226.17	0.028	1.9338	4644.14	glove
46	46	air_transport/glove_100000000_100,txt,txt	3.89256e+07	6239.04	0.024	1.9377	4724.07	glove
47	47	air_transport/glove_100000000_100,txt,txt	4.16584e+07	6454.33	-0.0445	2.0035	4811.7	glove
48	48	air_transport/glove_100000000_100,txt,txt	4.12411e+07	6421.92	-0.034	1.9935	4733.07	glove
49	49	air_transport/glove_100000000_100,txt,txt	3.96237e+07	6294.74	0.0065	1.9545	4674.45	glove
0	0	air_transport/glove_100000000_100,txt,txt	3.9239e+07	6264.11	-0.0034	1.964	4482.21	glove
1	1	air_transport/glove_100000000_100,txt,txt	3.76892e+07	6139.15	0.0363	1.9259	4399.62	glove
2	2	air_transport/glove_100000000_100,txt,txt	3.81831e+07	6179.25	0.0236	1.9381	4443.97	glove
3	3	air_transport/glove_100000000_100,txt,txt	3.80012e+07	6164.51	0.0283	1.9336	4415.12	glove
4	4	air_transport/glove_100000000_100,txt,txt	3.92063e+07	6261.49	-0.0025	1.9632	4368.42	glove
5	5	air_transport/glove_100000000_100,txt,txt	3.84676e+07	6202.23	0.0164	1.9451	4421.34	glove
6	6	air_transport/glove_100000000_100,txt,txt	3.79769e+07	6162.54	0.0289	1.933	4407.83	glove
7	7	air_transport/glove_100000000_100,txt,txt	4.01379e+07	6335.45	-0.0264	1.9861	4416.19	glove
8	8	air_transport/glove_100000000_100,txt,txt	3.93306e+07	6271.41	-0.0057	1.9663	4468.57	glove
9	9	air_transport/glove_100000000_100,txt,txt	4.00932e+07	6331.92	-0.0252	1.985	4494.8	glove
10	10	air_transport/glove_100000000_100,txt,txt	3.81097e+07	6173.31	0.0255	1.9363	4421.28	glove
11	11	air_transport/glove_100000000_100,txt,txt	4.1038e+07	6406.09	-0.0494	2.0082	4518.97	glove
12	12	air_transport/glove_100000000_100,txt,txt	3.75772e+07	6130.03	0.0391	1.9232	4429.01	glove
13	13	air_transport/glove_100000000_100,txt,txt	4.06311e+07	6374.25	-0.039	1.9982	4485.82	glove
14	14	air_transport/glove_100000000_100,txt,txt	4.19828e+07	6479.41	-0.0735	2.0314	4574	glove
15	15	air_transport/glove_100000000_100,txt,txt	3.98798e+07	6315.04	-0.0198	1.9798	4438.28	glove
16	16	air_transport/glove_100000000_100,txt,txt	3.92063e+07	6261.49	-0.0025	1.9632	4456.18	glove
17	17	air_transport/glove_100000000_100,txt,txt	3.77141e+07	6141.18	0.0356	1.9266	4417.47	glove
18	18	air_transport/glove_100000000_100,txt,txt	3.91485e+07	6256.88	-0.0011	1.9618	4410.33	glove
19	19	air_transport/glove_100000000_100,txt,txt	3.85532e+07	6209.12	0.0142	1.9472	4468.6	glove
20	20	air_transport/glove_100000000_100,txt,txt	4.02676e+07	6345.67	-0.0297	1.9893	4454.8	glove
21	21	air_transport/glove_100000000_100,txt,txt	4.29796e+07	6555.88	-0.099	2.0559	4576.46	glove
22	22	air_transport/glove_100000000_100,txt,txt	3.98643e+07	6313.82	-0.0194	1.9794	4509.65	glove
23	23	air_transport/glove_100000000_100,txt,txt	3.90108e+07	6245.87	0.0025	1.9584	4447.66	glove
24	24	air_transport/glove_100000000_100,txt,txt	3.89309e+07	6239.46	0.0045	1.9565	4461.67	glove
25	25	air_transport/glove_100000000_100,txt,txt	3.69645e+07	6079.84	0.0548	1.9081	4393.08	glove
26	26	air_transport/glove_100000000_100,txt,txt	3.70101e+07	6083.59	0.0536	1.9093	4364.92	glove
27	27	air_transport/glove_100000000_100,txt,txt	3.84051e+07	6197.19	0.018	1.9435	4415.99	glove
28	28	air_transport/glove_100000000_100,txt,txt	4.10406e+07	6406.29	-0.0494	2.0083	4470.17	glove
29	29	air_transport/glove_100000000_100,txt,txt	3.78982e+07	6156.15	0.0309	1.9311	4419.21	glove
30	30	air_transport/glove_100000000_100,txt,txt	3.88089e+07	6229.68	0.0076	1.9535	4460.25	glove
31	31	air_transport/glove_100000000_100,txt,txt	3.94846e+07	6283.68	-0.0097	1.9701	4394.38	glove
32	32	air_transport/glove_100000000_100,txt,txt	3.87087e+07	6221.63	0.0102	1.951	4409.83	glove
33	33	air_transport/glove_100000000_100,txt,txt	3.6683e+07	6056.65	0.062	1.9012	4385.08	glove
34	34	air_transport/glove_100000000_100,txt,txt	3.7253e+07	6103.53	0.0474	1.9152	4353.58	glove
35	35	air_transport/glove_100000000_100,txt,txt	4.11561e+07	6415.3	-0.0524	2.0111	4503.66	glove
36	36	air_transport/glove_100000000_100,txt,txt	3.82036e+07	6180.9	0.0231	1.9386	4336.65	glove
37	37	air_transport/glove_100000000_100,txt,txt	3.70114e+07	6083.7	0.0536	1.9093	4380.88	glove
38	38	air_transport/glove_100000000_100,txt,txt	3.80814e+07	6171.01	0.0262	1.9356	4382.23	glove
39	39	air_transport/glove_100000000_100,txt,txt	3.7153e+07	6095.33	0.05	1.9128	4392.52	glove
40	40	air_transport/glove_100000000_100,txt,txt	3.90757e+07	6251.06	0.0008	1.96	4428.1	glove
41	41	air_transport/glove_100000000_100,txt,txt	3.85691e+07	6210.4	0.0138	1.9476	4380.4	glove
42	42	air_transport/glove_100000000_100,txt,txt	3.89535e+07	6241.27	0.0039	1.957	4395.82	glove
43	43	air_transport/glove_100000000_100,txt,txt	3.69153e+07	6075.8	0.056	1.9069	4438.69	glove
44	44	air_transport/glove_100000000_100,txt,txt	3.7595e+07	6131.48	0.0387	1.9236	4394.18	glove
45	45	air_transport/glove_100000000_100,txt,txt	3.74413e+07	6118.93	0.0426	1.9199	4395.04	glove
46	46	air_transport/glove_100000000_100,txt,txt	4.07445e+07	6383.14	-0.0419	2.001	4482.41	glove
47	47	air_transport/glove_100000000_100,txt,txt	4.00312e+07	6327.02	-0.0236	1.9835	4470.06	glove
48	48	air_transport/glove_100000000_100,txt,txt	4.08463e+07	6391.11	-0.0445	2.0035	4510.78	glove
49	49	air_transport/glove_100000000_100,txt,txt	4.05321e+07	6366.48	-0.0364	1.9958	4496.33	glove
0	0	air_transport/glove_100000000_100,txt,txt	4.18326e+07	6467.81	0.0355	1.9267	4315.29	glove
1	1	air_transport/glove_100000000_100,txt,txt	4.20566e+07	6485.1	0.0303	1.9317	4289.16	glove
2	2	air_transport/glove_100000000_100,txt,txt	4.18973e+07	6472.81	0.034	1.9281	4225.65	glove
3	3	air_transport/glove_100000000_100,txt,txt	4.29888e+07	6556.59	0.0088	1.9523	4251.13	glove
4	4	air_transport/glove_100000000_100,txt,txt	4.81698e+07	6940.45	-0.1106	2.0671	4419.52	glove
5	5	air_transport/glove_100000000_100,txt,txt	4.27577e+07	6538.94	0.0141	1.9472	4203.99	glove
6	6	air_transport/glove_100000000_100,txt,txt	4.15222e+07	6443.77	0.0426	1.9198	4284.65	glove
7	7	air_transport/glove_100000000_100,txt,txt	4.18046e+07	6465.65	0.0361	1.9261	4235.75	glove
8	8	air_transport/glove_100000000_100,txt,txt	4.31852e+07	6571.54	0.0043	1.9567	4250.25	glove
9	9	air_transport/glove_100000000_100,txt,txt	4.21381e+07	6491.39	0.0284	1.9335	4236.39	glove
10	10	air_transport/glove_100000000_100,txt,txt	4.29833e+07	6556.17	0.0089	1.9522	4195.29	glove
11	11	air_transport/glove_100000000_100,txt,txt	4.22791e+07	6502.24	0.0252	1.9366	4319.85	glove
12	12	air_transport/glove_100000000_100,txt,txt	4.11113e+07	6411.81	0.0521	1.9107	4161.05	glove
13	13	air_transport/glove_100000000_100,txt,txt	4.687e+07	6846.17	-0.0807	2.0383	4378.81	glove
14	14	air_transport/glove_100000000_100,txt,txt	4.28178e+07	6543.53	0.0128	1.9485	4270.29	glove
15	15	air_transport/glove_100000000_100,txt,txt	4.2226e+07	6498.15	0.0264	1.9354	4203.41	glove
16	16	air_transport/glove_100000000_100,txt,txt	4.19395e+07	6476.07	0.033	1.9291	4263.39	glove
17	17	air_transport/glove_100000000_100,txt,txt	4.24714e+07	6517.01	0.0207	1.9409	4285.15	glove
18	18	air_transport/glove_100000000_100,txt,txt	4.23344e+07	6506.49	0.0239	1.9378	4226.2	glove
19	19	air_transport/glove_100000000_100,txt,txt	4.21984e+07	6496.03	0.027	1.9348	4199.52	glove
20	20	air_transport/glove_100000000_100,txt,txt	4.45167e+07	6672.08	-0.0264	1.9862	4226.1	glove
21	21	air_transport/glove_100000000_100,txt,txt	4.27326e+07	6537.02	0.0147	1.9466	4239.99	glove
22	22	air_transport/glove_100000000_100,txt,txt	4.23772e+07	6509.78	0.0229	1.9388	4194.02	glove
23	23	air_transport/glove_100000000_100,txt,txt	4.1251e+07	6422.69	0.0489	1.9138	4327.45	glove
24	24	air_transport/glove_100000000_100,txt,txt	4.18712e+07	6470.79	0.0346	1.9276	4290.64	glove
25	25	air_transport/glove_100000000_100,txt,txt	4.2195e+07	6495.76	0.0271	1.9347	4213.32	glove
26	26	air_transport/glove_100000000_100,txt,txt	4.23715e+07	6509.34	0.023	1.9386	4199.2	glove
27	27	air_transport/glove_100000000_100,txt,txt	4.29123e+07	6550.75	0.0106	1.9506	4301.74	glove
28	28	air_transport/glove_100000000_100,txt,txt	4.19479e+07	6476.72	0.0328	1.9293	4196.85	glove
29	29	air_transport/glove_100000000_100,txt,txt	4.35782e+07	6601.38	-0.0048	1.9654	4260.45	glove
30	30	air_transport/glove_100000000_100,txt,txt	4.28042e+07	6542.49	0.0131	1.9482	4173.66	glove
31	31	air_transport/glove_100000000_100,txt,txt	4.18327e+07	6467.82	0.0355	1.9267	4292.23	glove
32	32	air_transport/glove_100000000_100,txt,txt	4.29762e+07	6555.62	0.0091	1.952	4190.33	glove
33	33	air_transport/glove_100000000_100,txt,txt	4.16465e+07	6453.41	0.0398	1.9226	4225.44	glove
34	34	air_transport/glove_100000000_100,txt,txt	4.25558e+07	6523.48	0.0188	1.9427	4178.33	glove
35	35	air_transport/glove_100000000_100,txt,txt	4.10078e+07	6403.73	0.0545	1.9084	4221.38	glove
36	36	air_transport/glove_100000000_100,txt,txt	4.25374e+07	6522.07	0.0192	1.9423	4173.88	glove
37	37	air_transport/glove_100000000_100,txt,txt	4.32727e+07	6578.2	0.0023	1.9586	4254.99	glove
38	38	air_transport/glove_100000000_100,txt,txt	4.16889e+07	6456.69	0.0388	1.9235	4202.05	glove
39	39	air_transport/glove_100000000_100,txt,txt	4.1129e+07	6413.19	0.0517	1.9111	4307.93	glove
40	40	air_transport/glove_100000000_100,txt,txt	4.32306e+07	6575	0.0032	1.9577	4209.25	glove
41	41	air_transport/glove_100000000_100,txt,txt	4.31094e+07	6565.78	0.006	1.955	4231.72	glove
42	42	air_transport/glove_100000000_100,txt,txt	4.23758e+07	6509.67	0.0229	1.9387	4249.52	glove
43	43	air_transport/glove_100000000_100,txt,txt	4.44587e+07	6667.74	-0.0251	1.9849	4224.63	glove
44	44	air_transport/glove_100000000_100,txt,txt	4.22978e+07	6503.68	0.0247	1.937	4204.91	glove
45	45	air_transport/glove_100000000_100,txt,txt	4.37284e+07	6612.74	-0.0082	1.9687	4213.13	glove
46	46	air_transport/glove_100000000_100,txt,txt	4.18809e+07	6471.55	0.0344	1.9278	4258.8	glove
47	47	air_transport/glove_100000000_100,txt,txt	4.24392e+07	6514.54	0.0215	1.9401	4208.67	glove
48	48	air_transport/glove_100000000_100,txt,txt	4.3105e+07	6565.44	0.0061	1.9549	4230.76	glove
49	49	air_transport/glove_100000000_100,txt,txt	4.31351e+07	6567.73	0.0054	1.9556	4290.42	glove
0	0	air_transport/glove_100000000_100,txt,txt	4.22541e+07	6500.31	-0.0058	1.9664	4148.62	glove
1	1	air_transport/glove_100000000_100,txt,txt	4.12273e+07	6420.85	0.0186	1.9429	4209.27	glove
2	2	air_transport/glove_100000000_100,txt,txt	4.22292e+07	6498.4	-0.0052	1.9658	4176.91	glove
3	3	air_transport/glove_100000000_100,txt,txt	4.05367e+07	6366.84	0.0351	1.9271	4130.51	glove
4	4	air_transport/glove_100000000_100,txt,txt	4.02209e+07	6341.99	0.0426	1.9199	4296.75	glove
5	5	air_transport/glove_100000000_100,txt,txt	4.1057e+07	6407.57	0.0227	1.939	4253.11	glove
6	6	air_transport/glove_100000000_100,txt,txt	4.35054e+07	6595.86	-0.0356	1.995	4237.61	glove
7	7	air_transport/glove_100000000_100,txt,txt	4.08523e+07	6391.58	0.0275	1.9343	4201.1	glove
8	8	air_transport/glove_100000000_100,txt,txt	4.07362e+07	6382.49	0.0303	1.9317	4122.78	glove
9	9	air_transport/glove_100000000_100,txt,txt	4.10213e+07	6404.79	0.0235	1.9382	4241.5	glove
10	10	air_transport/glove_100000000_100,txt,txt	4.11656e+07	6416.05	0.0201	1.9415	4209.59	glove
11	11	air_transport/glove_100000000_100,txt,txt	4.06422e+07	6375.13	0.0325	1.9295	4238.49	glove
12	12	air_transport/glove_100000000_100,txt,txt	4.13506e+07	6430.44	0.0157	1.9457	4214.09	glove
13	13	air_transport/glove_100000000_100,txt,txt	4.09593e+07	6399.94	0.025	1.9368	4349.18	glove
14	14	air_transport/glove_100000000_100,txt,txt	3.98113e+07	6309.62	0.0523	1.9105	4169.17	glove
15	15	air_transport/glove_100000000_100,txt,txt	4.08082e+07	6388.13	0.0286	1.9333	4237.1	glove
16	16	air_transport/glove_100000000_100,txt,txt	3.99912e+07	6323.86	0.048	1.9146	4258.53	glove
17	17	air_transport/glove_100000000_100,txt,txt	4.04491e+07	6359.96	0.0371	1.9251	4263.21	glove
18	18	air_transport/glove_100000000_100,txt,txt	4.10486e+07	6406.92	0.0229	1.9388	4125.39	glove
19	19	air_transport/glove_100000000_100,txt,txt	4.19059e+07	6473.48	0.0025	1.9584	4139.07	glove
20	20	air_transport/glove_100000000_100,txt,txt	4.21541e+07	6492.62	-0.0035	1.9641	4164.33	glove
21	21	air_transport/glove_100000000_100,txt,txt	4.15563e+07	6446.42	0.0108	1.9504	4238.07	glove
22	22	air_transport/glove_100000000_100,txt,txt	4.08509e+07	6391.47	0.0276	1.9343	4213.86	glove
23	23	air_transport/glove_100000000_100,txt,txt	4.06752e+07	6377.71	0.0318	1.9303	4287.23	glove
24	24	air_transport/glove_100000000_100,txt,txt	4.08331e+07	6390.08	0.028	1.9339	4183.94	glove
25	25	air_transport/glove_100000000_100,txt,txt	4.07374e+07	6382.58	0.0303	1.9317	4212.63	glove
26	26	air_transport/glove_100000000_100,txt,txt	4.23792e+07	6509.93	-0.0088	1.9692	4350.41	glove
27	27	air_transport/glove_100000000_100,txt,txt	4.05472e+07	6367.67	0.0348	1.9273	4153.56	glove
28	28	air_transport/glove_100000000_100,txt,txt	4.0922e+07	6397.03	0.0259	1.9359	4119.04	glove
29	29	air_transport/glove_100000000_100,txt,txt	4.17043e+07	6457.89	0.0073	1.9538	4186.95	glove
30	30	air_transport/glove_100000000_100,txt,txt	4.17693e+07	6462.91	0.0057	1.9553	4169.25	glove
31	31	air_transport/glove_100000000_100,txt,txt	4.15378e+07	6444.98	0.0112	1.95	4226.23	glove
32	32	air_transport/glove_100000000_100,txt,txt	4.07708e+07	6385.2	0.0295	1.9325	4182.8	glove
33	33	air_transport/glove_100000000_100,txt,txt	4.15087e+07	6442.72	0.0119	1.9493	4278.04	glove
34	34	air_transport/glove_100000000_100,txt,txt	4.58109e+07	6768.38	-0.0905	2.0477	4249.87	glove
35	35	air_transport/glove_100000000_100,txt,txt	4.18669e+07	6470.47	0.0034	1.9575	4163.99	glove
36	36	air_transport/glove_100000000_100,txt,txt	4.03279e+07	6350.42	0.04	1.9223	4276.79	glove
37	37	air_transport/glove_100000000_100,txt,txt	3.97633e+07	6305.82	0.0535	1.9094	4313.53	glove
38	38	air_transport/glove_100000000_100,txt,txt	4.21406e+07	6491.58	-0.0031	1.9638	4272.48	glove
39	39	air_transport/glove_100000000_100,txt,txt	3.96882e+07	6299.86	0.0552	1.9077	4306.74	glove
40	40	air_transport/glove_100000000_100,txt,txt	4.03805e+07	6354.57	0.0388	1.9235	4210.85	glove
41	41	air_transport/glove_100000000_100,txt,txt	4.31897e+07	6571.89	-0.0281	1.9878	4173.46	glove
42	42	air_transport/glove_100000000_100,txt,txt	4.04781e+07	6362.24	0.0364	1.9258	4218.96	glove
43	43	air_transport/glove_100000000_100,txt,txt	4.0137e+07	6335.38	0.0446	1.918	4336.67	glove
44	44	air_transport/glove_100000000_100,txt,txt	4.00174e+07	6325.93	0.0474	1.9152	4302.57	glove
45	45	air_transport/glove_100000000_100,txt,txt	4.29511e+07	6553.71	-0.0224	1.9823	4239.71	glove
46	46	air_transport/glove_100000000_100,txt,txt	4.09451e+07	6398.83	0.0253	1.9364	4237	glove
47	47	air_transport/glove_100000000_100,txt,txt	4.2774e+07	6540.18	-0.0182	1.9783	4156.34	glove
48	48	air_transport/glove_100000000_100,txt,txt	4.0238e+07	6343.34	0.0422	1.9203	4224.7	glove
49	49	air_transport/glove_100000000_100,txt,txt	4.04699e+07	6361.6	0.0366	1.9256	4169.09	glove
0	0	air_transport/glove_100000000_100,txt,txt	2.90501e+07	5389.81	0.0287	1.9332	4307.88	glove
1	1	air_transport/glove_100000000_100,txt,txt	2.88757e+07	5373.61	0.0345	1.9276	4169.21	glove
2	2	air_transport/glove_100000000_100,txt,txt	2.85587e+07	5344.04	0.0451	1.9174	4145.33	glove
3	3	air_transport/glove_100000000_100,txt,txt	2.86311e+07	5350.8	0.0427	1.9198	4201.13	glove
4	4	air_transport/glove_100000000_100,txt,txt	2.77275e+07	5265.69	0.0729	1.8907	4162.47	glove
5	5	air_transport/glove_100000000_100,txt,txt	3.00142e+07	5478.52	-0.0036	1.9642	4201.08	glove
6	6	air_transport/glove_100000000_100,txt,txt	2.91249e+07	5396.75	0.0262	1.9356	4159.55	glove
7	7	air_transport/glove_100000000_100,txt,txt	2.9248e+07	5408.15	0.0221	1.9396	4203.31	glove
8	8	air_transport/glove_100000000_100,txt,txt	2.89624e+07	5381.67	0.0316	1.9304	4311.81	glove
9	9	air_transport/glove_100000000_100,txt,txt	2.73778e+07	5232.38	0.0846	1.8795	4140.96	glove
10	10	air_transport/glove_100000000_100,txt,txt	3.06703e+07	5538.08	-0.0255	1.9853	4254.54	glove
11	11	air_transport/glove_100000000_100,txt,txt	2.99983e+07	5477.07	-0.003	1.9637	4178.18	glove
12	12	air_transport/glove_100000000_100,txt,txt	2.92365e+07	5407.08	0.0225	1.9392	4157.77	glove
13	13	air_transport/glove_100000000_100,txt,txt	2.85274e+07	5341.11	0.0462	1.9164	4194.14	glove
14	14	air_transport/glove_100000000_100,txt,txt	2.8177e+07	5308.2	0.0579	1.9052	4187.5	glove
15	15	air_transport/glove_100000000_100,txt,txt	2.90576e+07	5390.51	0.0284	1.9335	4226.77	glove
16	16	air_transport/glove_100000000_100,txt,txt	2.77758e+07	5270.28	0.0713	1.8923	4079.43	glove
17	17	air_transport/glove_100000000_100,txt,txt	2.86011e+07	5348	0.0437	1.9188	4187.03	glove
18	18	air_transport/glove_100000000_100,txt,txt	2.8027e+07	5294.06	0.0629	1.9004	4217.07	glove
19	19	air_transport/glove_100000000_100,txt,txt	2.94006e+07	5422.23	0.017	1.9445	4225.79	glove
20	20	air_transport/glove_100000000_100,txt,txt	2.82837e+07	5318.24	0.0543	1.9086	4266.35	glove
21	21	air_transport/glove_100000000_100,txt,txt	2.8888e+07	5374.75	0.0341	1.928	4169.32	glove
22	22	air_transport/glove_100000000_100,txt,txt	2.94029e+07	5422.44	0.0169	1.9446	4161.22	glove
23	23	air_transport/glove_100000000_100,txt,txt	2.85388e+07	5342.17	0.0458	1.9168	4170.4	glove
24	24	air_transport/glove_100000000_100,txt,txt	2.82222e+07	5312.45	0.0564	1.9066	4165.12	glove
25	25	air_transport/glove_100000000_100,txt,txt	2.94603e+07	5427.74	0.015	1.9464	4285.35	glove
26	26	air_transport/glove_100000000_100,txt,txt	2.77744e+07	5270.14	0.0713	1.8922	4118.6	glove
27	27	air_transport/glove_100000000_100,txt,txt	2.81151e+07	5302.37	0.0599	1.9032	4204.22	glove
28	28	air_transport/glove_100000000_100,txt,txt	3.02909e+07	5503.72	-0.0128	1.9731	4207.79	glove
29	29	air_transport/glove_100000000_100,txt,txt	2.84888e+07	5337.49	0.0475	1.9152	4197.68	glove
30	30	air_transport/glove_100000000_100,txt,txt	2.79581e+07	5287.54	0.0652	1.8981	4207.66	glove
31	31	air_transport/glove_100000000_100,txt,txt	2.98469e+07	5463.23	0.002	1.9588	4253.14	glove
32	32	air_transport/glove_100000000_100,txt,txt	2.77634e+07	5269.1	0.0717	1.8919	4138.68	glove
33	33	air_transport/glove_100000000_100,txt,txt	2.85272e+07	5341.09	0.0462	1.9164	4248.18	glove
34	34	air_transport/glove_100000000_100,txt,txt	2.86694e+07	5354.38	0.0414	1.921	4184.03	glove
35	35	air_transport/glove_100000000_100,txt,txt	2.79624e+07	5287.95	0.0651	1.8983	4209.24	glove
36	36	air_transport/glove_100000000_100,txt,txt	2.81877e+07	5309.21	0.0575	1.9055	4126.53	glove
37	37	air_transport/glove_100000000_100,txt,txt	2.82654e+07	5316.52	0.0549	1.908	4261	glove
38	38	air_transport/glove_100000000_100,txt,txt	2.93777e+07	5420.12	0.0177	1.9437	4218.73	glove
39	39	air_transport/glove_100000000_100,txt,txt	2.77688e+07	5269.61	0.0715	1.8921	4201.05	glove
40	40	air_transport/glove_100000000_100,txt,txt	2.86958e+07	5356.85	0.0405	1.9218	4194.9	glove
41	41	air_transport/glove_100000000_100,txt,txt	2.96427e+07	5444.52	0.0089	1.9523	4159.44	glove
42	42	air_transport/glove_100000000_100,txt,txt	2.88615e+07	5372.29	0.035	1.9272	4222.49	glove
43	43	air_transport/glove_100000000_100,txt,txt	2.72812e+07	5223.14	0.0878	1.8764	4238.4	glove
44	44	air_transport/glove_100000000_100,txt,txt	2.84794e+07	5336.61	0.0478	1.9149	4171.74	glove
45	45	air_transport/glove_100000000_100,txt,txt	3.02708e+07	5501.89	-0.0121	1.9724	4236.86	glove
46	46	air_transport/glove_100000000_100,txt,txt	2.99954e+07	5476.81	-0.0029	1.9636	4211.52	glove
47	47	air_transport/glove_100000000_100,txt,txt	2.81427e+07	5304.97	0.059	1.9041	4182.62	glove
48	48	air_transport/glove_100000000_100,txt,txt	3.03569e+07	5509.71	-0.015	1.9752	4260.43	glove
49	49	air_transport/glove_100000000_100,txt,txt	2.78114e+07	5273.65	0.0701	1.8934	4180.21	glove
0	0	air_transport/glove_100000000_100,txt,txt	4.21906e+07	6495.43	0.0361	1.9261	4446.86	glove
1	1	air_transport/glove_100000000_100,txt,txt	4.05419e+07	6367.25	0.0738	1.8899	4442.32	glove
2	2	air_transport/glove_100000000_100,txt,txt	4.03968e+07	6355.85	0.0771	1.8867	4389.62	glove
3	3	air_transport/glove_100000000_100,txt,txt	4.14863e+07	6440.99	0.0522	1.9106	4393.67	glove
4	4	air_transport/glove_100000000_100,txt,txt	4.07903e+07	6386.73	0.0681	1.8953	4393.8	glove
5	5	air_transport/glove_100000000_100,txt,txt	4.23918e+07	6510.9	0.0315	1.9305	4290.88	glove
6	6	air_transport/glove_100000000_100,txt,txt	4.08634e+07	6392.45	0.0664	1.897	4281.18	glove
7	7	air_transport/glove_100000000_100,txt,txt	4.1576e+07	6447.94	0.0502	1.9126	4485.78	glove
8	8	air_transport/glove_100000000_100,txt,txt	4.26003e+07	6526.89	0.0268	1.9351	4321.27	glove
9	9	air_transport/glove_100000000_100,txt,txt	4.19836e+07	6479.47	0.0408	1.9215	4295.83	glove
10	10	air_transport/glove_100000000_100,txt,txt	4.12895e+07	6425.69	0.0567	1.9063	4464.43	glove
11	11	air_transport/glove_100000000_100,txt,txt	4.00255e+07	6326.57	0.0856	1.8786	4346.05	glove
12	12	air_transport/glove_100000000_100,txt,txt	4.25484e+07	6522.91	0.0279	1.9339	4382.03	glove
13	13	air_transport/glove_100000000_100,txt,txt	4.1523e+07	6443.84	0.0514	1.9114	4346.9	glove
14	14	air_transport/glove_100000000_100,txt,txt	4.01702e+07	6338	0.0823	1.8817	4261.76	glove
15	15	air_transport/glove_100000000_100,txt,txt	4.0865e+07	6392.58	0.0664	1.897	4360.36	glove
16	16	air_transport/glove_100000000_100,txt,txt	4.19593e+07	6477.6	0.0414	1.921	4235.87	glove
17	17	air_transport/glove_100000000_100,txt,txt	4.07245e+07	6381.58	0.0696	1.8939	4429.95	glove
18	18	air_transport/glove_100000000_100,txt,txt	4.06885e+07	6378.76	0.0704	1.8931	4476.92	glove
19	19	air_transport/glove_100000000_100,txt,txt	4.1716e+07	6458.79	0.047	1.9157	4475.22	glove
20	20	air_transport/glove_100000000_100,txt,txt	4.02861e+07	6347.13	0.0796	1.8843	4199.64	glove
21	21	air_transport/glove_100000000_100,txt,txt	39557439	6289.47	0.0963	1.8683	4422.03	glove
22	22	air_transport/glove_100000000_100,txt,txt	4.25109e+07	6520.04	0.0288	1.9331	4384.42	glove
23	23	air_transport/glove_100000000_100,txt,txt	4.17703e+07	6463	0.0457	1.9169	4266.33	glove
24	24	air_transport/glove_100000000_100,txt,txt	4.12131e+07	6419.74	0.0584	1.9046	4432.27	glove
25	25	air_transport/glove_100000000_100,txt,txt	4.18055e+07	6465.72	0.0449	1.9176	4447.06	glove
26	26	air_transport/glove_100000000_100,txt,txt	3.98115e+07	6309.63	0.0905	1.8739	4221.78	glove
27	27	air_transport/glove_100000000_100,txt,txt	4.20918e+07	6487.82	0.0384	1.9239	4424.38	glove
28	28	air_transport/glove_100000000_100,txt,txt	4.21175e+07	6489.8	0.0378	1.9245	4376.67	glove
29	29	air_transport/glove_100000000_100,txt,txt	4.04682e+07	6361.46	0.0755	1.8883	4359.52	glove
30	30	air_transport/glove_100000000_100,txt,txt	4.00423e+07	6327.9	0.0852	1.8789	4421.87	glove
31	31	air_transport/glove_100000000_100,txt,txt	4.12243e+07	6420.61	0.0582	1.9049	4385.5	glove
32	32	air_transport/glove_100000000_100,txt,txt	4.20093e+07	6481.46	0.0403	1.9221	4370.97	glove
33	33	air_transport/glove_100000000_100,txt,txt	4.14813e+07	6440.6	0.0523	1.9105	4291.79	glove
34	34	air_transport/glove_100000000_100,txt,txt	4.10164e+07	6404.4	0.0629	1.9003	4407.56	glove
35	35	air_transport/glove_100000000_100,txt,txt	4.2161e+07	6493.15	0.0368	1.9254	4490.45	glove
36	36	air_transport/glove_100000000_100,txt,txt	3.97269e+07	6302.93	0.0924	1.872	4310.82	glove
37	37	air_transport/glove_100000000_100,txt,txt	4.26355e+07	6529.58	0.026	1.9358	4375.24	glove
38	38	air_transport/glove_100000000_100,txt,txt	4.12707e+07	6424.23	0.0571	1.9059	4454.15	glove
39	39	air_transport/glove_100000000_100,txt,txt	4.00752e+07	6330.5	0.0844	1.8797	4286.13	glove
40	40	air_transport/glove_100000000_100,txt,txt	4.09e+07	6395.31	0.0656	1.8978	4262.43	glove
41	41	air_transport/glove_100000000_100,txt,txt	4.34688e+07	6593.09	0.0069	1.9541	4375.44	glove
42	42	air_transport/glove_100000000_100,txt,txt	4.09519e+07	6399.37	0.0644	1.8989	4450.19	glove
43	43	air_transport/glove_100000000_100,txt,txt	4.30054e+07	6557.85	0.0175	1.944	4340.66	glove
44	44	air_transport/glove_100000000_100,txt,txt	4.05553e+07	6368.31	0.0735	1.8902	4376.33	glove
45	45	air_transport/glove_100000000_100,txt,txt	4.19159e+07	6474.25	0.0424	1.9201	4396.57	glove
46	46	air_transport/glove_100000000_100,txt,txt	4.16677e+07	6455.06	0.0481	1.9146	4332.16	glove
47	47	air_transport/glove_100000000_100,txt,txt	4.17209e+07	6459.17	0.0468	1.9158	4492.01	glove
48	48	air_transport/glove_100000000_100,txt,txt	4.01871e+07	6339.33	0.0819	1.8821	4234.53	glove
49	49	air_transport/glove_100000000_100,txt,txt	4.10936e+07	6410.43	0.0612	1.902	4414.1	glove

## Sheet: tf
	Unnamed: 0	algorithm	mse	rmse	r2	adj_r2	mae	alg_ab
0	0	linear_regression	2.45902e+07	4958.85	0.2829	1.0652	3602.28	tf_linear_regression
1	1	linear_regression	2.45902e+07	4958.85	0.2829	1.0652	3602.28	tf_linear_regression
2	2	linear_regression	2.45902e+07	4958.85	0.2829	1.0652	3602.28	tf_linear_regression
3	3	linear_regression	2.45902e+07	4958.85	0.2829	1.0652	3602.28	tf_linear_regression
4	4	linear_regression	2.45902e+07	4958.85	0.2829	1.0652	3602.28	tf_linear_regression
5	5	linear_regression	2.45902e+07	4958.85	0.2829	1.0652	3602.28	tf_linear_regression
6	6	linear_regression	2.45902e+07	4958.85	0.2829	1.0652	3602.28	tf_linear_regression
7	7	linear_regression	2.45902e+07	4958.85	0.2829	1.0652	3602.28	tf_linear_regression
8	8	linear_regression	2.45902e+07	4958.85	0.2829	1.0652	3602.28	tf_linear_regression
9	9	linear_regression	2.45902e+07	4958.85	0.2829	1.0652	3602.28	tf_linear_regression
10	10	linear_regression	2.45902e+07	4958.85	0.2829	1.0652	3602.28	tf_linear_regression
11	11	linear_regression	2.45902e+07	4958.85	0.2829	1.0652	3602.28	tf_linear_regression
12	12	linear_regression	2.45902e+07	4958.85	0.2829	1.0652	3602.28	tf_linear_regression
13	13	linear_regression	2.45902e+07	4958.85	0.2829	1.0652	3602.28	tf_linear_regression
14	14	linear_regression	2.45902e+07	4958.85	0.2829	1.0652	3602.28	tf_linear_regression
15	15	linear_regression	2.45902e+07	4958.85	0.2829	1.0652	3602.28	tf_linear_regression
16	16	linear_regression	2.45902e+07	4958.85	0.2829	1.0652	3602.28	tf_linear_regression
17	17	linear_regression	2.45902e+07	4958.85	0.2829	1.0652	3602.28	tf_linear_regression
18	18	linear_regression	2.45902e+07	4958.85	0.2829	1.0652	3602.28	tf_linear_regression
19	19	linear_regression	2.45902e+07	4958.85	0.2829	1.0652	3602.28	tf_linear_regression
20	20	linear_regression	2.45902e+07	4958.85	0.2829	1.0652	3602.28	tf_linear_regression
21	21	linear_regression	2.45902e+07	4958.85	0.2829	1.0652	3602.28	tf_linear_regression
22	22	linear_regression	2.45902e+07	4958.85	0.2829	1.0652	3602.28	tf_linear_regression
23	23	linear_regression	2.45902e+07	4958.85	0.2829	1.0652	3602.28	tf_linear_regression
24	24	linear_regression	2.45902e+07	4958.85	0.2829	1.0652	3602.28	tf_linear_regression
25	25	linear_regression	2.45902e+07	4958.85	0.2829	1.0652	3602.28	tf_linear_regression
26	26	linear_regression	2.45902e+07	4958.85	0.2829	1.0652	3602.28	tf_linear_regression
27	27	linear_regression	2.45902e+07	4958.85	0.2829	1.0652	3602.28	tf_linear_regression
28	28	linear_regression	2.45902e+07	4958.85	0.2829	1.0652	3602.28	tf_linear_regression
29	29	linear_regression	2.45902e+07	4958.85	0.2829	1.0652	3602.28	tf_linear_regression
30	30	linear_regression	2.45902e+07	4958.85	0.2829	1.0652	3602.28	tf_linear_regression
31	31	linear_regression	2.45902e+07	4958.85	0.2829	1.0652	3602.28	tf_linear_regression
32	32	linear_regression	2.45902e+07	4958.85	0.2829	1.0652	3602.28	tf_linear_regression
33	33	linear_regression	2.45902e+07	4958.85	0.2829	1.0652	3602.28	tf_linear_regression
34	34	linear_regression	2.45902e+07	4958.85	0.2829	1.0652	3602.28	tf_linear_regression
35	35	linear_regression	2.45902e+07	4958.85	0.2829	1.0652	3602.28	tf_linear_regression
36	36	linear_regression	2.45902e+07	4958.85	0.2829	1.0652	3602.28	tf_linear_regression
37	37	linear_regression	2.45902e+07	4958.85	0.2829	1.0652	3602.28	tf_linear_regression
38	38	linear_regression	2.45902e+07	4958.85	0.2829	1.0652	3602.28	tf_linear_regression
39	39	linear_regression	2.45902e+07	4958.85	0.2829	1.0652	3602.28	tf_linear_regression
40	40	linear_regression	2.45902e+07	4958.85	0.2829	1.0652	3602.28	tf_linear_regression
41	41	linear_regression	2.45902e+07	4958.85	0.2829	1.0652	3602.28	tf_linear_regression
42	42	linear_regression	2.45902e+07	4958.85	0.2829	1.0652	3602.28	tf_linear_regression
43	43	linear_regression	2.45902e+07	4958.85	0.2829	1.0652	3602.28	tf_linear_regression
44	44	linear_regression	2.45902e+07	4958.85	0.2829	1.0652	3602.28	tf_linear_regression
45	45	linear_regression	2.45902e+07	4958.85	0.2829	1.0652	3602.28	tf_linear_regression
46	46	linear_regression	2.45902e+07	4958.85	0.2829	1.0652	3602.28	tf_linear_regression
47	47	linear_regression	2.45902e+07	4958.85	0.2829	1.0652	3602.28	tf_linear_regression
48	48	linear_regression	2.45902e+07	4958.85	0.2829	1.0652	3602.28	tf_linear_regression
49	49	linear_regression	2.45902e+07	4958.85	0.2829	1.0652	3602.28	tf_linear_regression
50	50	svr_linear	2.49345e+07	4993.44	0.2728	1.0661	3365.11	tf_svr_linear
51	51	svr_linear	2.49345e+07	4993.44	0.2728	1.0661	3365.11	tf_svr_linear
52	52	svr_linear	2.49345e+07	4993.44	0.2728	1.0661	3365.11	tf_svr_linear
53	53	svr_linear	2.49345e+07	4993.44	0.2728	1.0661	3365.11	tf_svr_linear
54	54	svr_linear	2.49345e+07	4993.44	0.2728	1.0661	3365.11	tf_svr_linear
55	55	svr_linear	2.49345e+07	4993.44	0.2728	1.0661	3365.11	tf_svr_linear
56	56	svr_linear	2.49345e+07	4993.44	0.2728	1.0661	3365.11	tf_svr_linear
57	57	svr_linear	2.49345e+07	4993.44	0.2728	1.0661	3365.11	tf_svr_linear
58	58	svr_linear	2.49345e+07	4993.44	0.2728	1.0661	3365.11	tf_svr_linear
59	59	svr_linear	2.49345e+07	4993.44	0.2728	1.0661	3365.11	tf_svr_linear
60	60	svr_linear	2.49345e+07	4993.44	0.2728	1.0661	3365.11	tf_svr_linear
61	61	svr_linear	2.49345e+07	4993.44	0.2728	1.0661	3365.11	tf_svr_linear
62	62	svr_linear	2.49345e+07	4993.44	0.2728	1.0661	3365.11	tf_svr_linear
63	63	svr_linear	2.49345e+07	4993.44	0.2728	1.0661	3365.11	tf_svr_linear
64	64	svr_linear	2.49345e+07	4993.44	0.2728	1.0661	3365.11	tf_svr_linear
65	65	svr_linear	2.49345e+07	4993.44	0.2728	1.0661	3365.11	tf_svr_linear
66	66	svr_linear	2.49345e+07	4993.44	0.2728	1.0661	3365.11	tf_svr_linear
67	67	svr_linear	2.49345e+07	4993.44	0.2728	1.0661	3365.11	tf_svr_linear
68	68	svr_linear	2.49345e+07	4993.44	0.2728	1.0661	3365.11	tf_svr_linear
69	69	svr_linear	2.49345e+07	4993.44	0.2728	1.0661	3365.11	tf_svr_linear
70	70	svr_linear	2.49345e+07	4993.44	0.2728	1.0661	3365.11	tf_svr_linear
71	71	svr_linear	2.49345e+07	4993.44	0.2728	1.0661	3365.11	tf_svr_linear
72	72	svr_linear	2.49345e+07	4993.44	0.2728	1.0661	3365.11	tf_svr_linear
73	73	svr_linear	2.49345e+07	4993.44	0.2728	1.0661	3365.11	tf_svr_linear
74	74	svr_linear	2.49345e+07	4993.44	0.2728	1.0661	3365.11	tf_svr_linear
75	75	svr_linear	2.49345e+07	4993.44	0.2728	1.0661	3365.11	tf_svr_linear
76	76	svr_linear	2.49345e+07	4993.44	0.2728	1.0661	3365.11	tf_svr_linear
77	77	svr_linear	2.49345e+07	4993.44	0.2728	1.0661	3365.11	tf_svr_linear
78	78	svr_linear	2.49345e+07	4993.44	0.2728	1.0661	3365.11	tf_svr_linear
79	79	svr_linear	2.49345e+07	4993.44	0.2728	1.0661	3365.11	tf_svr_linear
80	80	svr_linear	2.49345e+07	4993.44	0.2728	1.0661	3365.11	tf_svr_linear
81	81	svr_linear	2.49345e+07	4993.44	0.2728	1.0661	3365.11	tf_svr_linear
82	82	svr_linear	2.49345e+07	4993.44	0.2728	1.0661	3365.11	tf_svr_linear
83	83	svr_linear	2.49345e+07	4993.44	0.2728	1.0661	3365.11	tf_svr_linear
84	84	svr_linear	2.49345e+07	4993.44	0.2728	1.0661	3365.11	tf_svr_linear
85	85	svr_linear	2.49345e+07	4993.44	0.2728	1.0661	3365.11	tf_svr_linear
86	86	svr_linear	2.49345e+07	4993.44	0.2728	1.0661	3365.11	tf_svr_linear
87	87	svr_linear	2.49345e+07	4993.44	0.2728	1.0661	3365.11	tf_svr_linear
88	88	svr_linear	2.49345e+07	4993.44	0.2728	1.0661	3365.11	tf_svr_linear
89	89	svr_linear	2.49345e+07	4993.44	0.2728	1.0661	3365.11	tf_svr_linear
90	90	svr_linear	2.49345e+07	4993.44	0.2728	1.0661	3365.11	tf_svr_linear
91	91	svr_linear	2.49345e+07	4993.44	0.2728	1.0661	3365.11	tf_svr_linear
92	92	svr_linear	2.49345e+07	4993.44	0.2728	1.0661	3365.11	tf_svr_linear
93	93	svr_linear	2.49345e+07	4993.44	0.2728	1.0661	3365.11	tf_svr_linear
94	94	svr_linear	2.49345e+07	4993.44	0.2728	1.0661	3365.11	tf_svr_linear
95	95	svr_linear	2.49345e+07	4993.44	0.2728	1.0661	3365.11	tf_svr_linear
96	96	svr_linear	2.49345e+07	4993.44	0.2728	1.0661	3365.11	tf_svr_linear
97	97	svr_linear	2.49345e+07	4993.44	0.2728	1.0661	3365.11	tf_svr_linear
98	98	svr_linear	2.49345e+07	4993.44	0.2728	1.0661	3365.11	tf_svr_linear
99	99	svr_linear	2.49345e+07	4993.44	0.2728	1.0661	3365.11	tf_svr_linear
100	100	svr_poly_2	3.68393e+07	6069.54	-0.0744	1.0976	4388.8	tf_svr_poly_2
101	101	svr_poly_2	3.68393e+07	6069.54	-0.0744	1.0976	4388.8	tf_svr_poly_2
102	102	svr_poly_2	3.68393e+07	6069.54	-0.0744	1.0976	4388.8	tf_svr_poly_2
103	103	svr_poly_2	3.68393e+07	6069.54	-0.0744	1.0976	4388.8	tf_svr_poly_2
104	104	svr_poly_2	3.68393e+07	6069.54	-0.0744	1.0976	4388.8	tf_svr_poly_2
105	105	svr_poly_2	3.68393e+07	6069.54	-0.0744	1.0976	4388.8	tf_svr_poly_2
106	106	svr_poly_2	3.68393e+07	6069.54	-0.0744	1.0976	4388.8	tf_svr_poly_2
107	107	svr_poly_2	3.68393e+07	6069.54	-0.0744	1.0976	4388.8	tf_svr_poly_2
108	108	svr_poly_2	3.68393e+07	6069.54	-0.0744	1.0976	4388.8	tf_svr_poly_2
109	109	svr_poly_2	3.68393e+07	6069.54	-0.0744	1.0976	4388.8	tf_svr_poly_2
110	110	svr_poly_2	3.68393e+07	6069.54	-0.0744	1.0976	4388.8	tf_svr_poly_2
111	111	svr_poly_2	3.68393e+07	6069.54	-0.0744	1.0976	4388.8	tf_svr_poly_2
112	112	svr_poly_2	3.68393e+07	6069.54	-0.0744	1.0976	4388.8	tf_svr_poly_2
113	113	svr_poly_2	3.68393e+07	6069.54	-0.0744	1.0976	4388.8	tf_svr_poly_2
114	114	svr_poly_2	3.68393e+07	6069.54	-0.0744	1.0976	4388.8	tf_svr_poly_2
115	115	svr_poly_2	3.68393e+07	6069.54	-0.0744	1.0976	4388.8	tf_svr_poly_2
116	116	svr_poly_2	3.68393e+07	6069.54	-0.0744	1.0976	4388.8	tf_svr_poly_2
117	117	svr_poly_2	3.68393e+07	6069.54	-0.0744	1.0976	4388.8	tf_svr_poly_2
118	118	svr_poly_2	3.68393e+07	6069.54	-0.0744	1.0976	4388.8	tf_svr_poly_2
119	119	svr_poly_2	3.68393e+07	6069.54	-0.0744	1.0976	4388.8	tf_svr_poly_2
120	120	svr_poly_2	3.68393e+07	6069.54	-0.0744	1.0976	4388.8	tf_svr_poly_2
121	121	svr_poly_2	3.68393e+07	6069.54	-0.0744	1.0976	4388.8	tf_svr_poly_2
122	122	svr_poly_2	3.68393e+07	6069.54	-0.0744	1.0976	4388.8	tf_svr_poly_2
123	123	svr_poly_2	3.68393e+07	6069.54	-0.0744	1.0976	4388.8	tf_svr_poly_2
124	124	svr_poly_2	3.68393e+07	6069.54	-0.0744	1.0976	4388.8	tf_svr_poly_2
125	125	svr_poly_2	3.68393e+07	6069.54	-0.0744	1.0976	4388.8	tf_svr_poly_2
126	126	svr_poly_2	3.68393e+07	6069.54	-0.0744	1.0976	4388.8	tf_svr_poly_2
127	127	svr_poly_2	3.68393e+07	6069.54	-0.0744	1.0976	4388.8	tf_svr_poly_2
128	128	svr_poly_2	3.68393e+07	6069.54	-0.0744	1.0976	4388.8	tf_svr_poly_2
129	129	svr_poly_2	3.68393e+07	6069.54	-0.0744	1.0976	4388.8	tf_svr_poly_2
130	130	svr_poly_2	3.68393e+07	6069.54	-0.0744	1.0976	4388.8	tf_svr_poly_2
131	131	svr_poly_2	3.68393e+07	6069.54	-0.0744	1.0976	4388.8	tf_svr_poly_2
132	132	svr_poly_2	3.68393e+07	6069.54	-0.0744	1.0976	4388.8	tf_svr_poly_2
133	133	svr_poly_2	3.68393e+07	6069.54	-0.0744	1.0976	4388.8	tf_svr_poly_2
134	134	svr_poly_2	3.68393e+07	6069.54	-0.0744	1.0976	4388.8	tf_svr_poly_2
135	135	svr_poly_2	3.68393e+07	6069.54	-0.0744	1.0976	4388.8	tf_svr_poly_2
136	136	svr_poly_2	3.68393e+07	6069.54	-0.0744	1.0976	4388.8	tf_svr_poly_2
137	137	svr_poly_2	3.68393e+07	6069.54	-0.0744	1.0976	4388.8	tf_svr_poly_2
138	138	svr_poly_2	3.68393e+07	6069.54	-0.0744	1.0976	4388.8	tf_svr_poly_2
139	139	svr_poly_2	3.68393e+07	6069.54	-0.0744	1.0976	4388.8	tf_svr_poly_2
140	140	svr_poly_2	3.68393e+07	6069.54	-0.0744	1.0976	4388.8	tf_svr_poly_2
141	141	svr_poly_2	3.68393e+07	6069.54	-0.0744	1.0976	4388.8	tf_svr_poly_2
142	142	svr_poly_2	3.68393e+07	6069.54	-0.0744	1.0976	4388.8	tf_svr_poly_2
143	143	svr_poly_2	3.68393e+07	6069.54	-0.0744	1.0976	4388.8	tf_svr_poly_2
144	144	svr_poly_2	3.68393e+07	6069.54	-0.0744	1.0976	4388.8	tf_svr_poly_2
145	145	svr_poly_2	3.68393e+07	6069.54	-0.0744	1.0976	4388.8	tf_svr_poly_2
146	146	svr_poly_2	3.68393e+07	6069.54	-0.0744	1.0976	4388.8	tf_svr_poly_2
147	147	svr_poly_2	3.68393e+07	6069.54	-0.0744	1.0976	4388.8	tf_svr_poly_2
148	148	svr_poly_2	3.68393e+07	6069.54	-0.0744	1.0976	4388.8	tf_svr_poly_2
149	149	svr_poly_2	3.68393e+07	6069.54	-0.0744	1.0976	4388.8	tf_svr_poly_2
150	150	svr_poly_3	3.68227e+07	6068.17	-0.0739	1.0976	4388.13	tf_svr_poly_3
151	151	svr_poly_3	3.68227e+07	6068.17	-0.0739	1.0976	4388.13	tf_svr_poly_3
152	152	svr_poly_3	3.68227e+07	6068.17	-0.0739	1.0976	4388.13	tf_svr_poly_3
153	153	svr_poly_3	3.68227e+07	6068.17	-0.0739	1.0976	4388.13	tf_svr_poly_3
154	154	svr_poly_3	3.68227e+07	6068.17	-0.0739	1.0976	4388.13	tf_svr_poly_3
155	155	svr_poly_3	3.68227e+07	6068.17	-0.0739	1.0976	4388.13	tf_svr_poly_3
156	156	svr_poly_3	3.68227e+07	6068.17	-0.0739	1.0976	4388.13	tf_svr_poly_3
157	157	svr_poly_3	3.68227e+07	6068.17	-0.0739	1.0976	4388.13	tf_svr_poly_3
158	158	svr_poly_3	3.68227e+07	6068.17	-0.0739	1.0976	4388.13	tf_svr_poly_3
159	159	svr_poly_3	3.68227e+07	6068.17	-0.0739	1.0976	4388.13	tf_svr_poly_3
160	160	svr_poly_3	3.68227e+07	6068.17	-0.0739	1.0976	4388.13	tf_svr_poly_3
161	161	svr_poly_3	3.68227e+07	6068.17	-0.0739	1.0976	4388.13	tf_svr_poly_3
162	162	svr_poly_3	3.68227e+07	6068.17	-0.0739	1.0976	4388.13	tf_svr_poly_3
163	163	svr_poly_3	3.68227e+07	6068.17	-0.0739	1.0976	4388.13	tf_svr_poly_3
164	164	svr_poly_3	3.68227e+07	6068.17	-0.0739	1.0976	4388.13	tf_svr_poly_3
165	165	svr_poly_3	3.68227e+07	6068.17	-0.0739	1.0976	4388.13	tf_svr_poly_3
166	166	svr_poly_3	3.68227e+07	6068.17	-0.0739	1.0976	4388.13	tf_svr_poly_3
167	167	svr_poly_3	3.68227e+07	6068.17	-0.0739	1.0976	4388.13	tf_svr_poly_3
168	168	svr_poly_3	3.68227e+07	6068.17	-0.0739	1.0976	4388.13	tf_svr_poly_3
169	169	svr_poly_3	3.68227e+07	6068.17	-0.0739	1.0976	4388.13	tf_svr_poly_3
170	170	svr_poly_3	3.68227e+07	6068.17	-0.0739	1.0976	4388.13	tf_svr_poly_3
171	171	svr_poly_3	3.68227e+07	6068.17	-0.0739	1.0976	4388.13	tf_svr_poly_3
172	172	svr_poly_3	3.68227e+07	6068.17	-0.0739	1.0976	4388.13	tf_svr_poly_3
173	173	svr_poly_3	3.68227e+07	6068.17	-0.0739	1.0976	4388.13	tf_svr_poly_3
174	174	svr_poly_3	3.68227e+07	6068.17	-0.0739	1.0976	4388.13	tf_svr_poly_3
175	175	svr_poly_3	3.68227e+07	6068.17	-0.0739	1.0976	4388.13	tf_svr_poly_3
176	176	svr_poly_3	3.68227e+07	6068.17	-0.0739	1.0976	4388.13	tf_svr_poly_3
177	177	svr_poly_3	3.68227e+07	6068.17	-0.0739	1.0976	4388.13	tf_svr_poly_3
178	178	svr_poly_3	3.68227e+07	6068.17	-0.0739	1.0976	4388.13	tf_svr_poly_3
179	179	svr_poly_3	3.68227e+07	6068.17	-0.0739	1.0976	4388.13	tf_svr_poly_3
180	180	svr_poly_3	3.68227e+07	6068.17	-0.0739	1.0976	4388.13	tf_svr_poly_3
181	181	svr_poly_3	3.68227e+07	6068.17	-0.0739	1.0976	4388.13	tf_svr_poly_3
182	182	svr_poly_3	3.68227e+07	6068.17	-0.0739	1.0976	4388.13	tf_svr_poly_3
183	183	svr_poly_3	3.68227e+07	6068.17	-0.0739	1.0976	4388.13	tf_svr_poly_3
184	184	svr_poly_3	3.68227e+07	6068.17	-0.0739	1.0976	4388.13	tf_svr_poly_3
185	185	svr_poly_3	3.68227e+07	6068.17	-0.0739	1.0976	4388.13	tf_svr_poly_3
186	186	svr_poly_3	3.68227e+07	6068.17	-0.0739	1.0976	4388.13	tf_svr_poly_3
187	187	svr_poly_3	3.68227e+07	6068.17	-0.0739	1.0976	4388.13	tf_svr_poly_3
188	188	svr_poly_3	3.68227e+07	6068.17	-0.0739	1.0976	4388.13	tf_svr_poly_3
189	189	svr_poly_3	3.68227e+07	6068.17	-0.0739	1.0976	4388.13	tf_svr_poly_3
190	190	svr_poly_3	3.68227e+07	6068.17	-0.0739	1.0976	4388.13	tf_svr_poly_3
191	191	svr_poly_3	3.68227e+07	6068.17	-0.0739	1.0976	4388.13	tf_svr_poly_3
192	192	svr_poly_3	3.68227e+07	6068.17	-0.0739	1.0976	4388.13	tf_svr_poly_3
193	193	svr_poly_3	3.68227e+07	6068.17	-0.0739	1.0976	4388.13	tf_svr_poly_3
194	194	svr_poly_3	3.68227e+07	6068.17	-0.0739	1.0976	4388.13	tf_svr_poly_3
195	195	svr_poly_3	3.68227e+07	6068.17	-0.0739	1.0976	4388.13	tf_svr_poly_3
196	196	svr_poly_3	3.68227e+07	6068.17	-0.0739	1.0976	4388.13	tf_svr_poly_3
197	197	svr_poly_3	3.68227e+07	6068.17	-0.0739	1.0976	4388.13	tf_svr_poly_3
198	198	svr_poly_3	3.68227e+07	6068.17	-0.0739	1.0976	4388.13	tf_svr_poly_3
199	199	svr_poly_3	3.68227e+07	6068.17	-0.0739	1.0976	4388.13	tf_svr_poly_3
200	200	svr_poly_4	3.68019e+07	6066.46	-0.0733	1.0975	4387.33	tf_svr_poly_4
201	201	svr_poly_4	3.68019e+07	6066.46	-0.0733	1.0975	4387.33	tf_svr_poly_4
202	202	svr_poly_4	3.68019e+07	6066.46	-0.0733	1.0975	4387.33	tf_svr_poly_4
203	203	svr_poly_4	3.68019e+07	6066.46	-0.0733	1.0975	4387.33	tf_svr_poly_4
204	204	svr_poly_4	3.68019e+07	6066.46	-0.0733	1.0975	4387.33	tf_svr_poly_4
205	205	svr_poly_4	3.68019e+07	6066.46	-0.0733	1.0975	4387.33	tf_svr_poly_4
206	206	svr_poly_4	3.68019e+07	6066.46	-0.0733	1.0975	4387.33	tf_svr_poly_4
207	207	svr_poly_4	3.68019e+07	6066.46	-0.0733	1.0975	4387.33	tf_svr_poly_4
208	208	svr_poly_4	3.68019e+07	6066.46	-0.0733	1.0975	4387.33	tf_svr_poly_4
209	209	svr_poly_4	3.68019e+07	6066.46	-0.0733	1.0975	4387.33	tf_svr_poly_4
210	210	svr_poly_4	3.68019e+07	6066.46	-0.0733	1.0975	4387.33	tf_svr_poly_4
211	211	svr_poly_4	3.68019e+07	6066.46	-0.0733	1.0975	4387.33	tf_svr_poly_4
212	212	svr_poly_4	3.68019e+07	6066.46	-0.0733	1.0975	4387.33	tf_svr_poly_4
213	213	svr_poly_4	3.68019e+07	6066.46	-0.0733	1.0975	4387.33	tf_svr_poly_4
214	214	svr_poly_4	3.68019e+07	6066.46	-0.0733	1.0975	4387.33	tf_svr_poly_4
215	215	svr_poly_4	3.68019e+07	6066.46	-0.0733	1.0975	4387.33	tf_svr_poly_4
216	216	svr_poly_4	3.68019e+07	6066.46	-0.0733	1.0975	4387.33	tf_svr_poly_4
217	217	svr_poly_4	3.68019e+07	6066.46	-0.0733	1.0975	4387.33	tf_svr_poly_4
218	218	svr_poly_4	3.68019e+07	6066.46	-0.0733	1.0975	4387.33	tf_svr_poly_4
219	219	svr_poly_4	3.68019e+07	6066.46	-0.0733	1.0975	4387.33	tf_svr_poly_4
220	220	svr_poly_4	3.68019e+07	6066.46	-0.0733	1.0975	4387.33	tf_svr_poly_4
221	221	svr_poly_4	3.68019e+07	6066.46	-0.0733	1.0975	4387.33	tf_svr_poly_4
222	222	svr_poly_4	3.68019e+07	6066.46	-0.0733	1.0975	4387.33	tf_svr_poly_4
223	223	svr_poly_4	3.68019e+07	6066.46	-0.0733	1.0975	4387.33	tf_svr_poly_4
224	224	svr_poly_4	3.68019e+07	6066.46	-0.0733	1.0975	4387.33	tf_svr_poly_4
225	225	svr_poly_4	3.68019e+07	6066.46	-0.0733	1.0975	4387.33	tf_svr_poly_4
226	226	svr_poly_4	3.68019e+07	6066.46	-0.0733	1.0975	4387.33	tf_svr_poly_4
227	227	svr_poly_4	3.68019e+07	6066.46	-0.0733	1.0975	4387.33	tf_svr_poly_4
228	228	svr_poly_4	3.68019e+07	6066.46	-0.0733	1.0975	4387.33	tf_svr_poly_4
229	229	svr_poly_4	3.68019e+07	6066.46	-0.0733	1.0975	4387.33	tf_svr_poly_4
230	230	svr_poly_4	3.68019e+07	6066.46	-0.0733	1.0975	4387.33	tf_svr_poly_4
231	231	svr_poly_4	3.68019e+07	6066.46	-0.0733	1.0975	4387.33	tf_svr_poly_4
232	232	svr_poly_4	3.68019e+07	6066.46	-0.0733	1.0975	4387.33	tf_svr_poly_4
233	233	svr_poly_4	3.68019e+07	6066.46	-0.0733	1.0975	4387.33	tf_svr_poly_4
234	234	svr_poly_4	3.68019e+07	6066.46	-0.0733	1.0975	4387.33	tf_svr_poly_4
235	235	svr_poly_4	3.68019e+07	6066.46	-0.0733	1.0975	4387.33	tf_svr_poly_4
236	236	svr_poly_4	3.68019e+07	6066.46	-0.0733	1.0975	4387.33	tf_svr_poly_4
237	237	svr_poly_4	3.68019e+07	6066.46	-0.0733	1.0975	4387.33	tf_svr_poly_4
238	238	svr_poly_4	3.68019e+07	6066.46	-0.0733	1.0975	4387.33	tf_svr_poly_4
239	239	svr_poly_4	3.68019e+07	6066.46	-0.0733	1.0975	4387.33	tf_svr_poly_4
240	240	svr_poly_4	3.68019e+07	6066.46	-0.0733	1.0975	4387.33	tf_svr_poly_4
241	241	svr_poly_4	3.68019e+07	6066.46	-0.0733	1.0975	4387.33	tf_svr_poly_4
242	242	svr_poly_4	3.68019e+07	6066.46	-0.0733	1.0975	4387.33	tf_svr_poly_4
243	243	svr_poly_4	3.68019e+07	6066.46	-0.0733	1.0975	4387.33	tf_svr_poly_4
244	244	svr_poly_4	3.68019e+07	6066.46	-0.0733	1.0975	4387.33	tf_svr_poly_4
245	245	svr_poly_4	3.68019e+07	6066.46	-0.0733	1.0975	4387.33	tf_svr_poly_4
246	246	svr_poly_4	3.68019e+07	6066.46	-0.0733	1.0975	4387.33	tf_svr_poly_4
247	247	svr_poly_4	3.68019e+07	6066.46	-0.0733	1.0975	4387.33	tf_svr_poly_4
248	248	svr_poly_4	3.68019e+07	6066.46	-0.0733	1.0975	4387.33	tf_svr_poly_4
249	249	svr_poly_4	3.68019e+07	6066.46	-0.0733	1.0975	4387.33	tf_svr_poly_4
250	250	svr_poly_10	3.56484e+07	5970.63	-0.0396	1.0945	4282.71	tf_svr_poly_10
251	251	svr_poly_10	3.56484e+07	5970.63	-0.0396	1.0945	4282.71	tf_svr_poly_10
252	252	svr_poly_10	3.56484e+07	5970.63	-0.0396	1.0945	4282.71	tf_svr_poly_10
253	253	svr_poly_10	3.56484e+07	5970.63	-0.0396	1.0945	4282.71	tf_svr_poly_10
254	254	svr_poly_10	3.56484e+07	5970.63	-0.0396	1.0945	4282.71	tf_svr_poly_10
255	255	svr_poly_10	3.56484e+07	5970.63	-0.0396	1.0945	4282.71	tf_svr_poly_10
256	256	svr_poly_10	3.56484e+07	5970.63	-0.0396	1.0945	4282.71	tf_svr_poly_10
257	257	svr_poly_10	3.56484e+07	5970.63	-0.0396	1.0945	4282.71	tf_svr_poly_10
258	258	svr_poly_10	3.56484e+07	5970.63	-0.0396	1.0945	4282.71	tf_svr_poly_10
259	259	svr_poly_10	3.56484e+07	5970.63	-0.0396	1.0945	4282.71	tf_svr_poly_10
260	260	svr_poly_10	3.56484e+07	5970.63	-0.0396	1.0945	4282.71	tf_svr_poly_10
261	261	svr_poly_10	3.56484e+07	5970.63	-0.0396	1.0945	4282.71	tf_svr_poly_10
262	262	svr_poly_10	3.56484e+07	5970.63	-0.0396	1.0945	4282.71	tf_svr_poly_10
263	263	svr_poly_10	3.56484e+07	5970.63	-0.0396	1.0945	4282.71	tf_svr_poly_10
264	264	svr_poly_10	3.56484e+07	5970.63	-0.0396	1.0945	4282.71	tf_svr_poly_10
265	265	svr_poly_10	3.56484e+07	5970.63	-0.0396	1.0945	4282.71	tf_svr_poly_10
266	266	svr_poly_10	3.56484e+07	5970.63	-0.0396	1.0945	4282.71	tf_svr_poly_10
267	267	svr_poly_10	3.56484e+07	5970.63	-0.0396	1.0945	4282.71	tf_svr_poly_10
268	268	svr_poly_10	3.56484e+07	5970.63	-0.0396	1.0945	4282.71	tf_svr_poly_10
269	269	svr_poly_10	3.56484e+07	5970.63	-0.0396	1.0945	4282.71	tf_svr_poly_10
270	270	svr_poly_10	3.56484e+07	5970.63	-0.0396	1.0945	4282.71	tf_svr_poly_10
271	271	svr_poly_10	3.56484e+07	5970.63	-0.0396	1.0945	4282.71	tf_svr_poly_10
272	272	svr_poly_10	3.56484e+07	5970.63	-0.0396	1.0945	4282.71	tf_svr_poly_10
273	273	svr_poly_10	3.56484e+07	5970.63	-0.0396	1.0945	4282.71	tf_svr_poly_10
274	274	svr_poly_10	3.56484e+07	5970.63	-0.0396	1.0945	4282.71	tf_svr_poly_10
275	275	svr_poly_10	3.56484e+07	5970.63	-0.0396	1.0945	4282.71	tf_svr_poly_10
276	276	svr_poly_10	3.56484e+07	5970.63	-0.0396	1.0945	4282.71	tf_svr_poly_10
277	277	svr_poly_10	3.56484e+07	5970.63	-0.0396	1.0945	4282.71	tf_svr_poly_10
278	278	svr_poly_10	3.56484e+07	5970.63	-0.0396	1.0945	4282.71	tf_svr_poly_10
279	279	svr_poly_10	3.56484e+07	5970.63	-0.0396	1.0945	4282.71	tf_svr_poly_10
280	280	svr_poly_10	3.56484e+07	5970.63	-0.0396	1.0945	4282.71	tf_svr_poly_10
281	281	svr_poly_10	3.56484e+07	5970.63	-0.0396	1.0945	4282.71	tf_svr_poly_10
282	282	svr_poly_10	3.56484e+07	5970.63	-0.0396	1.0945	4282.71	tf_svr_poly_10
283	283	svr_poly_10	3.56484e+07	5970.63	-0.0396	1.0945	4282.71	tf_svr_poly_10
284	284	svr_poly_10	3.56484e+07	5970.63	-0.0396	1.0945	4282.71	tf_svr_poly_10
285	285	svr_poly_10	3.56484e+07	5970.63	-0.0396	1.0945	4282.71	tf_svr_poly_10
286	286	svr_poly_10	3.56484e+07	5970.63	-0.0396	1.0945	4282.71	tf_svr_poly_10
287	287	svr_poly_10	3.56484e+07	5970.63	-0.0396	1.0945	4282.71	tf_svr_poly_10
288	288	svr_poly_10	3.56484e+07	5970.63	-0.0396	1.0945	4282.71	tf_svr_poly_10
289	289	svr_poly_10	3.56484e+07	5970.63	-0.0396	1.0945	4282.71	tf_svr_poly_10
290	290	svr_poly_10	3.56484e+07	5970.63	-0.0396	1.0945	4282.71	tf_svr_poly_10
291	291	svr_poly_10	3.56484e+07	5970.63	-0.0396	1.0945	4282.71	tf_svr_poly_10
292	292	svr_poly_10	3.56484e+07	5970.63	-0.0396	1.0945	4282.71	tf_svr_poly_10
293	293	svr_poly_10	3.56484e+07	5970.63	-0.0396	1.0945	4282.71	tf_svr_poly_10
294	294	svr_poly_10	3.56484e+07	5970.63	-0.0396	1.0945	4282.71	tf_svr_poly_10
295	295	svr_poly_10	3.56484e+07	5970.63	-0.0396	1.0945	4282.71	tf_svr_poly_10
296	296	svr_poly_10	3.56484e+07	5970.63	-0.0396	1.0945	4282.71	tf_svr_poly_10
297	297	svr_poly_10	3.56484e+07	5970.63	-0.0396	1.0945	4282.71	tf_svr_poly_10
298	298	svr_poly_10	3.56484e+07	5970.63	-0.0396	1.0945	4282.71	tf_svr_poly_10
299	299	svr_poly_10	3.56484e+07	5970.63	-0.0396	1.0945	4282.71	tf_svr_poly_10
300	300	svr_poly_15	1.31791e+08	11480	-2.8436	1.3493	5359.15	tf_svr_poly_15
301	301	svr_poly_15	1.31791e+08	11480	-2.8436	1.3493	5359.15	tf_svr_poly_15
302	302	svr_poly_15	1.31791e+08	11480	-2.8436	1.3493	5359.15	tf_svr_poly_15
303	303	svr_poly_15	1.31791e+08	11480	-2.8436	1.3493	5359.15	tf_svr_poly_15
304	304	svr_poly_15	1.31791e+08	11480	-2.8436	1.3493	5359.15	tf_svr_poly_15
305	305	svr_poly_15	1.31791e+08	11480	-2.8436	1.3493	5359.15	tf_svr_poly_15
306	306	svr_poly_15	1.31791e+08	11480	-2.8436	1.3493	5359.15	tf_svr_poly_15
307	307	svr_poly_15	1.31791e+08	11480	-2.8436	1.3493	5359.15	tf_svr_poly_15
308	308	svr_poly_15	1.31791e+08	11480	-2.8436	1.3493	5359.15	tf_svr_poly_15
309	309	svr_poly_15	1.31791e+08	11480	-2.8436	1.3493	5359.15	tf_svr_poly_15
310	310	svr_poly_15	1.31791e+08	11480	-2.8436	1.3493	5359.15	tf_svr_poly_15
311	311	svr_poly_15	1.31791e+08	11480	-2.8436	1.3493	5359.15	tf_svr_poly_15
312	312	svr_poly_15	1.31791e+08	11480	-2.8436	1.3493	5359.15	tf_svr_poly_15
313	313	svr_poly_15	1.31791e+08	11480	-2.8436	1.3493	5359.15	tf_svr_poly_15
314	314	svr_poly_15	1.31791e+08	11480	-2.8436	1.3493	5359.15	tf_svr_poly_15
315	315	svr_poly_15	1.31791e+08	11480	-2.8436	1.3493	5359.15	tf_svr_poly_15
316	316	svr_poly_15	1.31791e+08	11480	-2.8436	1.3493	5359.15	tf_svr_poly_15
317	317	svr_poly_15	1.31791e+08	11480	-2.8436	1.3493	5359.15	tf_svr_poly_15
318	318	svr_poly_15	1.31791e+08	11480	-2.8436	1.3493	5359.15	tf_svr_poly_15
319	319	svr_poly_15	1.31791e+08	11480	-2.8436	1.3493	5359.15	tf_svr_poly_15
320	320	svr_poly_15	1.31791e+08	11480	-2.8436	1.3493	5359.15	tf_svr_poly_15
321	321	svr_poly_15	1.31791e+08	11480	-2.8436	1.3493	5359.15	tf_svr_poly_15
322	322	svr_poly_15	1.31791e+08	11480	-2.8436	1.3493	5359.15	tf_svr_poly_15
323	323	svr_poly_15	1.31791e+08	11480	-2.8436	1.3493	5359.15	tf_svr_poly_15
324	324	svr_poly_15	1.31791e+08	11480	-2.8436	1.3493	5359.15	tf_svr_poly_15
325	325	svr_poly_15	1.31791e+08	11480	-2.8436	1.3493	5359.15	tf_svr_poly_15
326	326	svr_poly_15	1.31791e+08	11480	-2.8436	1.3493	5359.15	tf_svr_poly_15
327	327	svr_poly_15	1.31791e+08	11480	-2.8436	1.3493	5359.15	tf_svr_poly_15
328	328	svr_poly_15	1.31791e+08	11480	-2.8436	1.3493	5359.15	tf_svr_poly_15
329	329	svr_poly_15	1.31791e+08	11480	-2.8436	1.3493	5359.15	tf_svr_poly_15
330	330	svr_poly_15	1.31791e+08	11480	-2.8436	1.3493	5359.15	tf_svr_poly_15
331	331	svr_poly_15	1.31791e+08	11480	-2.8436	1.3493	5359.15	tf_svr_poly_15
332	332	svr_poly_15	1.31791e+08	11480	-2.8436	1.3493	5359.15	tf_svr_poly_15
333	333	svr_poly_15	1.31791e+08	11480	-2.8436	1.3493	5359.15	tf_svr_poly_15
334	334	svr_poly_15	1.31791e+08	11480	-2.8436	1.3493	5359.15	tf_svr_poly_15
335	335	svr_poly_15	1.31791e+08	11480	-2.8436	1.3493	5359.15	tf_svr_poly_15
336	336	svr_poly_15	1.31791e+08	11480	-2.8436	1.3493	5359.15	tf_svr_poly_15
337	337	svr_poly_15	1.31791e+08	11480	-2.8436	1.3493	5359.15	tf_svr_poly_15
338	338	svr_poly_15	1.31791e+08	11480	-2.8436	1.3493	5359.15	tf_svr_poly_15
339	339	svr_poly_15	1.31791e+08	11480	-2.8436	1.3493	5359.15	tf_svr_poly_15
340	340	svr_poly_15	1.31791e+08	11480	-2.8436	1.3493	5359.15	tf_svr_poly_15
341	341	svr_poly_15	1.31791e+08	11480	-2.8436	1.3493	5359.15	tf_svr_poly_15
342	342	svr_poly_15	1.31791e+08	11480	-2.8436	1.3493	5359.15	tf_svr_poly_15
343	343	svr_poly_15	1.31791e+08	11480	-2.8436	1.3493	5359.15	tf_svr_poly_15
344	344	svr_poly_15	1.31791e+08	11480	-2.8436	1.3493	5359.15	tf_svr_poly_15
345	345	svr_poly_15	1.31791e+08	11480	-2.8436	1.3493	5359.15	tf_svr_poly_15
346	346	svr_poly_15	1.31791e+08	11480	-2.8436	1.3493	5359.15	tf_svr_poly_15
347	347	svr_poly_15	1.31791e+08	11480	-2.8436	1.3493	5359.15	tf_svr_poly_15
348	348	svr_poly_15	1.31791e+08	11480	-2.8436	1.3493	5359.15	tf_svr_poly_15
349	349	svr_poly_15	1.31791e+08	11480	-2.8436	1.3493	5359.15	tf_svr_poly_15
350	350	svr_rbf	3.68591e+07	6071.17	-0.075	1.0977	4389.6	tf_svr_rbf
351	351	svr_rbf	3.68591e+07	6071.17	-0.075	1.0977	4389.6	tf_svr_rbf
352	352	svr_rbf	3.68591e+07	6071.17	-0.075	1.0977	4389.6	tf_svr_rbf
353	353	svr_rbf	3.68591e+07	6071.17	-0.075	1.0977	4389.6	tf_svr_rbf
354	354	svr_rbf	3.68591e+07	6071.17	-0.075	1.0977	4389.6	tf_svr_rbf
355	355	svr_rbf	3.68591e+07	6071.17	-0.075	1.0977	4389.6	tf_svr_rbf
356	356	svr_rbf	3.68591e+07	6071.17	-0.075	1.0977	4389.6	tf_svr_rbf
357	357	svr_rbf	3.68591e+07	6071.17	-0.075	1.0977	4389.6	tf_svr_rbf
358	358	svr_rbf	3.68591e+07	6071.17	-0.075	1.0977	4389.6	tf_svr_rbf
359	359	svr_rbf	3.68591e+07	6071.17	-0.075	1.0977	4389.6	tf_svr_rbf
360	360	svr_rbf	3.68591e+07	6071.17	-0.075	1.0977	4389.6	tf_svr_rbf
361	361	svr_rbf	3.68591e+07	6071.17	-0.075	1.0977	4389.6	tf_svr_rbf
362	362	svr_rbf	3.68591e+07	6071.17	-0.075	1.0977	4389.6	tf_svr_rbf
363	363	svr_rbf	3.68591e+07	6071.17	-0.075	1.0977	4389.6	tf_svr_rbf
364	364	svr_rbf	3.68591e+07	6071.17	-0.075	1.0977	4389.6	tf_svr_rbf
365	365	svr_rbf	3.68591e+07	6071.17	-0.075	1.0977	4389.6	tf_svr_rbf
366	366	svr_rbf	3.68591e+07	6071.17	-0.075	1.0977	4389.6	tf_svr_rbf
367	367	svr_rbf	3.68591e+07	6071.17	-0.075	1.0977	4389.6	tf_svr_rbf
368	368	svr_rbf	3.68591e+07	6071.17	-0.075	1.0977	4389.6	tf_svr_rbf
369	369	svr_rbf	3.68591e+07	6071.17	-0.075	1.0977	4389.6	tf_svr_rbf
370	370	svr_rbf	3.68591e+07	6071.17	-0.075	1.0977	4389.6	tf_svr_rbf
371	371	svr_rbf	3.68591e+07	6071.17	-0.075	1.0977	4389.6	tf_svr_rbf
372	372	svr_rbf	3.68591e+07	6071.17	-0.075	1.0977	4389.6	tf_svr_rbf
373	373	svr_rbf	3.68591e+07	6071.17	-0.075	1.0977	4389.6	tf_svr_rbf
374	374	svr_rbf	3.68591e+07	6071.17	-0.075	1.0977	4389.6	tf_svr_rbf
375	375	svr_rbf	3.68591e+07	6071.17	-0.075	1.0977	4389.6	tf_svr_rbf
376	376	svr_rbf	3.68591e+07	6071.17	-0.075	1.0977	4389.6	tf_svr_rbf
377	377	svr_rbf	3.68591e+07	6071.17	-0.075	1.0977	4389.6	tf_svr_rbf
378	378	svr_rbf	3.68591e+07	6071.17	-0.075	1.0977	4389.6	tf_svr_rbf
379	379	svr_rbf	3.68591e+07	6071.17	-0.075	1.0977	4389.6	tf_svr_rbf
380	380	svr_rbf	3.68591e+07	6071.17	-0.075	1.0977	4389.6	tf_svr_rbf
381	381	svr_rbf	3.68591e+07	6071.17	-0.075	1.0977	4389.6	tf_svr_rbf
382	382	svr_rbf	3.68591e+07	6071.17	-0.075	1.0977	4389.6	tf_svr_rbf
383	383	svr_rbf	3.68591e+07	6071.17	-0.075	1.0977	4389.6	tf_svr_rbf
384	384	svr_rbf	3.68591e+07	6071.17	-0.075	1.0977	4389.6	tf_svr_rbf
385	385	svr_rbf	3.68591e+07	6071.17	-0.075	1.0977	4389.6	tf_svr_rbf
386	386	svr_rbf	3.68591e+07	6071.17	-0.075	1.0977	4389.6	tf_svr_rbf
387	387	svr_rbf	3.68591e+07	6071.17	-0.075	1.0977	4389.6	tf_svr_rbf
388	388	svr_rbf	3.68591e+07	6071.17	-0.075	1.0977	4389.6	tf_svr_rbf
389	389	svr_rbf	3.68591e+07	6071.17	-0.075	1.0977	4389.6	tf_svr_rbf
390	390	svr_rbf	3.68591e+07	6071.17	-0.075	1.0977	4389.6	tf_svr_rbf
391	391	svr_rbf	3.68591e+07	6071.17	-0.075	1.0977	4389.6	tf_svr_rbf
392	392	svr_rbf	3.68591e+07	6071.17	-0.075	1.0977	4389.6	tf_svr_rbf
393	393	svr_rbf	3.68591e+07	6071.17	-0.075	1.0977	4389.6	tf_svr_rbf
394	394	svr_rbf	3.68591e+07	6071.17	-0.075	1.0977	4389.6	tf_svr_rbf
395	395	svr_rbf	3.68591e+07	6071.17	-0.075	1.0977	4389.6	tf_svr_rbf
396	396	svr_rbf	3.68591e+07	6071.17	-0.075	1.0977	4389.6	tf_svr_rbf
397	397	svr_rbf	3.68591e+07	6071.17	-0.075	1.0977	4389.6	tf_svr_rbf
398	398	svr_rbf	3.68591e+07	6071.17	-0.075	1.0977	4389.6	tf_svr_rbf
399	399	svr_rbf	3.68591e+07	6071.17	-0.075	1.0977	4389.6	tf_svr_rbf
400	400	svr_sigmoid	3.68593e+07	6071.19	-0.075	1.0977	4389.61	tf_svr_sigmoid
401	401	svr_sigmoid	3.68593e+07	6071.19	-0.075	1.0977	4389.61	tf_svr_sigmoid
402	402	svr_sigmoid	3.68593e+07	6071.19	-0.075	1.0977	4389.61	tf_svr_sigmoid
403	403	svr_sigmoid	3.68593e+07	6071.19	-0.075	1.0977	4389.61	tf_svr_sigmoid
404	404	svr_sigmoid	3.68593e+07	6071.19	-0.075	1.0977	4389.61	tf_svr_sigmoid
405	405	svr_sigmoid	3.68593e+07	6071.19	-0.075	1.0977	4389.61	tf_svr_sigmoid
406	406	svr_sigmoid	3.68593e+07	6071.19	-0.075	1.0977	4389.61	tf_svr_sigmoid
407	407	svr_sigmoid	3.68593e+07	6071.19	-0.075	1.0977	4389.61	tf_svr_sigmoid
408	408	svr_sigmoid	3.68593e+07	6071.19	-0.075	1.0977	4389.61	tf_svr_sigmoid
409	409	svr_sigmoid	3.68593e+07	6071.19	-0.075	1.0977	4389.61	tf_svr_sigmoid
410	410	svr_sigmoid	3.68593e+07	6071.19	-0.075	1.0977	4389.61	tf_svr_sigmoid
411	411	svr_sigmoid	3.68593e+07	6071.19	-0.075	1.0977	4389.61	tf_svr_sigmoid
412	412	svr_sigmoid	3.68593e+07	6071.19	-0.075	1.0977	4389.61	tf_svr_sigmoid
413	413	svr_sigmoid	3.68593e+07	6071.19	-0.075	1.0977	4389.61	tf_svr_sigmoid
414	414	svr_sigmoid	3.68593e+07	6071.19	-0.075	1.0977	4389.61	tf_svr_sigmoid
415	415	svr_sigmoid	3.68593e+07	6071.19	-0.075	1.0977	4389.61	tf_svr_sigmoid
416	416	svr_sigmoid	3.68593e+07	6071.19	-0.075	1.0977	4389.61	tf_svr_sigmoid
417	417	svr_sigmoid	3.68593e+07	6071.19	-0.075	1.0977	4389.61	tf_svr_sigmoid
418	418	svr_sigmoid	3.68593e+07	6071.19	-0.075	1.0977	4389.61	tf_svr_sigmoid
419	419	svr_sigmoid	3.68593e+07	6071.19	-0.075	1.0977	4389.61	tf_svr_sigmoid
420	420	svr_sigmoid	3.68593e+07	6071.19	-0.075	1.0977	4389.61	tf_svr_sigmoid
421	421	svr_sigmoid	3.68593e+07	6071.19	-0.075	1.0977	4389.61	tf_svr_sigmoid
422	422	svr_sigmoid	3.68593e+07	6071.19	-0.075	1.0977	4389.61	tf_svr_sigmoid
423	423	svr_sigmoid	3.68593e+07	6071.19	-0.075	1.0977	4389.61	tf_svr_sigmoid
424	424	svr_sigmoid	3.68593e+07	6071.19	-0.075	1.0977	4389.61	tf_svr_sigmoid
425	425	svr_sigmoid	3.68593e+07	6071.19	-0.075	1.0977	4389.61	tf_svr_sigmoid
426	426	svr_sigmoid	3.68593e+07	6071.19	-0.075	1.0977	4389.61	tf_svr_sigmoid
427	427	svr_sigmoid	3.68593e+07	6071.19	-0.075	1.0977	4389.61	tf_svr_sigmoid
428	428	svr_sigmoid	3.68593e+07	6071.19	-0.075	1.0977	4389.61	tf_svr_sigmoid
429	429	svr_sigmoid	3.68593e+07	6071.19	-0.075	1.0977	4389.61	tf_svr_sigmoid
430	430	svr_sigmoid	3.68593e+07	6071.19	-0.075	1.0977	4389.61	tf_svr_sigmoid
431	431	svr_sigmoid	3.68593e+07	6071.19	-0.075	1.0977	4389.61	tf_svr_sigmoid
432	432	svr_sigmoid	3.68593e+07	6071.19	-0.075	1.0977	4389.61	tf_svr_sigmoid
433	433	svr_sigmoid	3.68593e+07	6071.19	-0.075	1.0977	4389.61	tf_svr_sigmoid
434	434	svr_sigmoid	3.68593e+07	6071.19	-0.075	1.0977	4389.61	tf_svr_sigmoid
435	435	svr_sigmoid	3.68593e+07	6071.19	-0.075	1.0977	4389.61	tf_svr_sigmoid
436	436	svr_sigmoid	3.68593e+07	6071.19	-0.075	1.0977	4389.61	tf_svr_sigmoid
437	437	svr_sigmoid	3.68593e+07	6071.19	-0.075	1.0977	4389.61	tf_svr_sigmoid
438	438	svr_sigmoid	3.68593e+07	6071.19	-0.075	1.0977	4389.61	tf_svr_sigmoid
439	439	svr_sigmoid	3.68593e+07	6071.19	-0.075	1.0977	4389.61	tf_svr_sigmoid
440	440	svr_sigmoid	3.68593e+07	6071.19	-0.075	1.0977	4389.61	tf_svr_sigmoid
441	441	svr_sigmoid	3.68593e+07	6071.19	-0.075	1.0977	4389.61	tf_svr_sigmoid
442	442	svr_sigmoid	3.68593e+07	6071.19	-0.075	1.0977	4389.61	tf_svr_sigmoid
443	443	svr_sigmoid	3.68593e+07	6071.19	-0.075	1.0977	4389.61	tf_svr_sigmoid
444	444	svr_sigmoid	3.68593e+07	6071.19	-0.075	1.0977	4389.61	tf_svr_sigmoid
445	445	svr_sigmoid	3.68593e+07	6071.19	-0.075	1.0977	4389.61	tf_svr_sigmoid
446	446	svr_sigmoid	3.68593e+07	6071.19	-0.075	1.0977	4389.61	tf_svr_sigmoid
447	447	svr_sigmoid	3.68593e+07	6071.19	-0.075	1.0977	4389.61	tf_svr_sigmoid
448	448	svr_sigmoid	3.68593e+07	6071.19	-0.075	1.0977	4389.61	tf_svr_sigmoid
449	449	svr_sigmoid	3.68593e+07	6071.19	-0.075	1.0977	4389.61	tf_svr_sigmoid
450	450	random_forest_10	2.03428e+07	4510.3	0.4067	1.0539	3006.45	tf_random_forest_10
451	451	random_forest_10	2.15951e+07	4647.05	0.3702	1.0572	3071.01	tf_random_forest_10
452	452	random_forest_10	1.90145e+07	4360.56	0.4455	1.0504	3030.48	tf_random_forest_10
453	453	random_forest_10	2.14269e+07	4628.92	0.3751	1.0568	3121.71	tf_random_forest_10
454	454	random_forest_10	2.05395e+07	4532.05	0.401	1.0544	3164.37	tf_random_forest_10
455	455	random_forest_10	2.36627e+07	4864.43	0.3099	1.0627	3304.3	tf_random_forest_10
456	456	random_forest_10	2.0921e+07	4573.95	0.3899	1.0554	3026.61	tf_random_forest_10
457	457	random_forest_10	2.12224e+07	4606.78	0.3811	1.0562	3132.7	tf_random_forest_10
458	458	random_forest_10	2.14178e+07	4627.93	0.3754	1.0568	2981.19	tf_random_forest_10
459	459	random_forest_10	1.89575e+07	4354.02	0.4471	1.0502	2880.08	tf_random_forest_10
460	460	random_forest_10	2.15066e+07	4637.52	0.3728	1.057	3232.98	tf_random_forest_10
461	461	random_forest_10	1.80808e+07	4252.15	0.4727	1.0479	2834.54	tf_random_forest_10
462	462	random_forest_10	2.12449e+07	4609.22	0.3804	1.0563	3119.12	tf_random_forest_10
463	463	random_forest_10	2.16492e+07	4652.87	0.3686	1.0574	3182.26	tf_random_forest_10
464	464	random_forest_10	1.9637e+07	4431.36	0.4273	1.052	2939.29	tf_random_forest_10
465	465	random_forest_10	2.04631e+07	4523.61	0.4032	1.0542	3047.68	tf_random_forest_10
466	466	random_forest_10	2.02178e+07	4496.42	0.4104	1.0536	3098.16	tf_random_forest_10
467	467	random_forest_10	2.23608e+07	4728.72	0.3479	1.0593	3236.59	tf_random_forest_10
468	468	random_forest_10	2.08199e+07	4562.88	0.3928	1.0552	3050.62	tf_random_forest_10
469	469	random_forest_10	2.43796e+07	4937.57	0.289	1.0646	3202.78	tf_random_forest_10
470	470	random_forest_10	2.0705e+07	4550.28	0.3962	1.0549	3183.56	tf_random_forest_10
471	471	random_forest_10	2.45155e+07	4951.31	0.285	1.065	3202.13	tf_random_forest_10
472	472	random_forest_10	2.06179e+07	4540.7	0.3987	1.0546	3146.31	tf_random_forest_10
473	473	random_forest_10	2.09088e+07	4572.61	0.3902	1.0554	2976.74	tf_random_forest_10
474	474	random_forest_10	2.4525e+07	4952.27	0.2848	1.065	3385.1	tf_random_forest_10
475	475	random_forest_10	1.95539e+07	4421.98	0.4297	1.0518	3071.92	tf_random_forest_10
476	476	random_forest_10	2.24619e+07	4739.4	0.3449	1.0595	3184.7	tf_random_forest_10
477	477	random_forest_10	2.16081e+07	4648.45	0.3698	1.0573	3222.5	tf_random_forest_10
478	478	random_forest_10	2.16818e+07	4656.38	0.3677	1.0575	3121.33	tf_random_forest_10
479	479	random_forest_10	1.82481e+07	4271.78	0.4678	1.0484	2863.9	tf_random_forest_10
480	480	random_forest_10	2.09202e+07	4573.86	0.3899	1.0554	3043.83	tf_random_forest_10
481	481	random_forest_10	2.14705e+07	4633.63	0.3738	1.0569	3040.08	tf_random_forest_10
482	482	random_forest_10	2.23906e+07	4731.87	0.347	1.0593	3261.55	tf_random_forest_10
483	483	random_forest_10	1.97364e+07	4442.56	0.4244	1.0523	2999.19	tf_random_forest_10
484	484	random_forest_10	2.33349e+07	4830.62	0.3195	1.0618	3157.1	tf_random_forest_10
485	485	random_forest_10	2.2042e+07	4694.89	0.3572	1.0584	3316.86	tf_random_forest_10
486	486	random_forest_10	2.18123e+07	4670.36	0.3639	1.0578	3085.46	tf_random_forest_10
487	487	random_forest_10	2.06135e+07	4540.21	0.3988	1.0546	3069.75	tf_random_forest_10
488	488	random_forest_10	2.16184e+07	4649.56	0.3695	1.0573	3221.53	tf_random_forest_10
489	489	random_forest_10	2.3137e+07	4810.09	0.3252	1.0613	3221.93	tf_random_forest_10
490	490	random_forest_10	2.20382e+07	4694.48	0.3573	1.0584	3189.35	tf_random_forest_10
491	491	random_forest_10	2.23671e+07	4729.39	0.3477	1.0593	3258.83	tf_random_forest_10
492	492	random_forest_10	2.12738e+07	4612.35	0.3796	1.0564	3102.25	tf_random_forest_10
493	493	random_forest_10	2.01433e+07	4488.13	0.4125	1.0534	2981.47	tf_random_forest_10
494	494	random_forest_10	2.42352e+07	4922.93	0.2932	1.0642	3195.35	tf_random_forest_10
495	495	random_forest_10	2.21804e+07	4709.6	0.3531	1.0588	3130.64	tf_random_forest_10
496	496	random_forest_10	2.16623e+07	4654.28	0.3682	1.0574	3053.73	tf_random_forest_10
497	497	random_forest_10	2.13606e+07	4621.75	0.377	1.0566	3081.72	tf_random_forest_10
498	498	random_forest_10	1.71127e+07	4136.75	0.5009	1.0454	2760.07	tf_random_forest_10
499	499	random_forest_10	2.30804e+07	4804.2	0.3269	1.0612	3152.14	tf_random_forest_10
500	500	random_forest_50	2.18408e+07	4673.41	0.363	1.0579	3098.45	tf_random_forest_50
501	501	random_forest_50	1.88159e+07	4337.74	0.4513	1.0499	2930.71	tf_random_forest_50
502	502	random_forest_50	1.88379e+07	4340.27	0.4506	1.0499	2889.48	tf_random_forest_50
503	503	random_forest_50	2.01788e+07	4492.09	0.4115	1.0535	3016.96	tf_random_forest_50
504	504	random_forest_50	2.00467e+07	4477.36	0.4154	1.0531	3001.12	tf_random_forest_50
505	505	random_forest_50	1.97254e+07	4441.33	0.4247	1.0523	2952.15	tf_random_forest_50
506	506	random_forest_50	2.03657e+07	4512.84	0.4061	1.054	3034.03	tf_random_forest_50
507	507	random_forest_50	1.91755e+07	4378.98	0.4408	1.0508	2954.05	tf_random_forest_50
508	508	random_forest_50	1.94374e+07	4408.78	0.4331	1.0515	2915.32	tf_random_forest_50
509	509	random_forest_50	2.06149e+07	4540.36	0.3988	1.0546	3059.32	tf_random_forest_50
510	510	random_forest_50	1.99317e+07	4464.49	0.4187	1.0528	2998.14	tf_random_forest_50
511	511	random_forest_50	2.00973e+07	4483	0.4139	1.0533	2995.88	tf_random_forest_50
512	512	random_forest_50	2.05424e+07	4532.37	0.4009	1.0544	3039.42	tf_random_forest_50
513	513	random_forest_50	1.99769e+07	4469.55	0.4174	1.0529	3014.46	tf_random_forest_50
514	514	random_forest_50	1.97382e+07	4442.77	0.4244	1.0523	3015.5	tf_random_forest_50
515	515	random_forest_50	2.07261e+07	4552.59	0.3955	1.0549	3051	tf_random_forest_50
516	516	random_forest_50	1.90639e+07	4366.23	0.444	1.0505	2938.92	tf_random_forest_50
517	517	random_forest_50	2.01473e+07	4488.57	0.4124	1.0534	3008.07	tf_random_forest_50
518	518	random_forest_50	20565072	4534.87	0.4002	1.0545	3063.84	tf_random_forest_50
519	519	random_forest_50	1.98989e+07	4460.82	0.4197	1.0527	2978.06	tf_random_forest_50
520	520	random_forest_50	2.00555e+07	4478.33	0.4151	1.0532	3058.69	tf_random_forest_50
521	521	random_forest_50	1.91747e+07	4378.89	0.4408	1.0508	2949.81	tf_random_forest_50
522	522	random_forest_50	1.97284e+07	4441.67	0.4246	1.0523	2982.66	tf_random_forest_50
523	523	random_forest_50	2.05526e+07	4533.5	0.4006	1.0545	3101.37	tf_random_forest_50
524	524	random_forest_50	2.0516e+07	4529.46	0.4017	1.0544	3081.18	tf_random_forest_50
525	525	random_forest_50	1.92916e+07	4392.22	0.4374	1.0511	2976.84	tf_random_forest_50
526	526	random_forest_50	2.08671e+07	4568.05	0.3914	1.0553	3033	tf_random_forest_50
527	527	random_forest_50	2.06937e+07	4549.03	0.3965	1.0548	3024.6	tf_random_forest_50
528	528	random_forest_50	2.00696e+07	4479.91	0.4147	1.0532	3003.48	tf_random_forest_50
529	529	random_forest_50	1.99625e+07	4467.95	0.4178	1.0529	2936.47	tf_random_forest_50
530	530	random_forest_50	2.04214e+07	4519.01	0.4044	1.0541	3007.4	tf_random_forest_50
531	531	random_forest_50	1.91557e+07	4376.72	0.4413	1.0508	2947.26	tf_random_forest_50
532	532	random_forest_50	19372216	4401.39	0.435	1.0513	2927.73	tf_random_forest_50
533	533	random_forest_50	1.96285e+07	4430.41	0.4276	1.052	2899.05	tf_random_forest_50
534	534	random_forest_50	2.0269e+07	4502.11	0.4089	1.0537	3022.46	tf_random_forest_50
535	535	random_forest_50	1.97215e+07	4440.89	0.4248	1.0523	3000.89	tf_random_forest_50
536	536	random_forest_50	2.0361e+07	4512.32	0.4062	1.054	3024.12	tf_random_forest_50
537	537	random_forest_50	2.03996e+07	4516.59	0.4051	1.0541	3047.25	tf_random_forest_50
538	538	random_forest_50	2.02647e+07	4501.63	0.409	1.0537	2975.02	tf_random_forest_50
539	539	random_forest_50	2.0379e+07	4514.31	0.4057	1.054	2917.98	tf_random_forest_50
540	540	random_forest_50	2.00937e+07	4482.6	0.414	1.0533	2988.91	tf_random_forest_50
541	541	random_forest_50	2.00341e+07	4475.95	0.4157	1.0531	3009.94	tf_random_forest_50
542	542	random_forest_50	2.05886e+07	4537.47	0.3996	1.0546	3070.35	tf_random_forest_50
543	543	random_forest_50	2.03849e+07	4514.96	0.4055	1.054	3098.22	tf_random_forest_50
544	544	random_forest_50	2.11866e+07	4602.89	0.3821	1.0562	3005.38	tf_random_forest_50
545	545	random_forest_50	2.04359e+07	4520.61	0.404	1.0542	2996.92	tf_random_forest_50
546	546	random_forest_50	2.03344e+07	4509.37	0.407	1.0539	2983.44	tf_random_forest_50
547	547	random_forest_50	2.0046e+07	4477.28	0.4154	1.0531	2991.26	tf_random_forest_50
548	548	random_forest_50	1.98656e+07	4457.09	0.4206	1.0527	2959.91	tf_random_forest_50
549	549	random_forest_50	1.97415e+07	4443.14	0.4243	1.0523	2953.8	tf_random_forest_50
550	550	random_forest_100	2.02828e+07	4503.64	0.4085	1.0538	2985.68	tf_random_forest_100
551	551	random_forest_100	2.01744e+07	4491.59	0.4116	1.0535	2972.75	tf_random_forest_100
552	552	random_forest_100	1.97925e+07	4448.88	0.4228	1.0525	2993.98	tf_random_forest_100
553	553	random_forest_100	1.96803e+07	4436.25	0.426	1.0522	2953.21	tf_random_forest_100
554	554	random_forest_100	2.01077e+07	4484.16	0.4136	1.0533	2986.03	tf_random_forest_100
555	555	random_forest_100	1.93864e+07	4403	0.4346	1.0514	2943.29	tf_random_forest_100
556	556	random_forest_100	2.02037e+07	4494.85	0.4108	1.0535	2985.44	tf_random_forest_100
557	557	random_forest_100	1.98558e+07	4455.99	0.4209	1.0526	2983.95	tf_random_forest_100
558	558	random_forest_100	1.9591e+07	4426.17	0.4286	1.0519	2983.81	tf_random_forest_100
559	559	random_forest_100	2.03233e+07	4508.14	0.4073	1.0539	3032.04	tf_random_forest_100
560	560	random_forest_100	2.07002e+07	4549.74	0.3963	1.0549	3039.7	tf_random_forest_100
561	561	random_forest_100	2.01344e+07	4487.14	0.4128	1.0534	2964.45	tf_random_forest_100
562	562	random_forest_100	1.94301e+07	4407.95	0.4333	1.0515	2940.71	tf_random_forest_100
563	563	random_forest_100	2.03607e+07	4512.28	0.4062	1.054	2953.25	tf_random_forest_100
564	564	random_forest_100	1.91838e+07	4379.94	0.4405	1.0508	2934.39	tf_random_forest_100
565	565	random_forest_100	2.00299e+07	4475.47	0.4159	1.0531	2962.18	tf_random_forest_100
566	566	random_forest_100	2.02096e+07	4495.51	0.4106	1.0536	3040.2	tf_random_forest_100
567	567	random_forest_100	2.11288e+07	4596.61	0.3838	1.056	3111.3	tf_random_forest_100
568	568	random_forest_100	2.0518e+07	4529.68	0.4016	1.0544	3013.9	tf_random_forest_100
569	569	random_forest_100	1.9612e+07	4428.54	0.428	1.052	2934.39	tf_random_forest_100
570	570	random_forest_100	1.95418e+07	4420.61	0.4301	1.0518	2980.74	tf_random_forest_100
571	571	random_forest_100	1.92974e+07	4392.88	0.4372	1.0511	2960.74	tf_random_forest_100
572	572	random_forest_100	1.99059e+07	4461.6	0.4195	1.0528	2940.62	tf_random_forest_100
573	573	random_forest_100	1.96007e+07	4427.27	0.4284	1.0519	2943.16	tf_random_forest_100
574	574	random_forest_100	1.9642e+07	4431.93	0.4272	1.0521	2945.1	tf_random_forest_100
575	575	random_forest_100	1.99783e+07	4469.71	0.4174	1.0529	2995.52	tf_random_forest_100
576	576	random_forest_100	1.96677e+07	4434.83	0.4264	1.0521	2925.24	tf_random_forest_100
577	577	random_forest_100	1.97336e+07	4442.25	0.4245	1.0523	2981.01	tf_random_forest_100
578	578	random_forest_100	1.93049e+07	4393.73	0.437	1.0512	2913.8	tf_random_forest_100
579	579	random_forest_100	1.96045e+07	4427.7	0.4283	1.052	2978.35	tf_random_forest_100
580	580	random_forest_100	1.9766e+07	4445.9	0.4235	1.0524	2924.1	tf_random_forest_100
581	581	random_forest_100	1.98157e+07	4451.48	0.4221	1.0525	2981.03	tf_random_forest_100
582	582	random_forest_100	2.02068e+07	4495.2	0.4107	1.0536	2999.64	tf_random_forest_100
583	583	random_forest_100	1.98544e+07	4455.82	0.421	1.0526	2963.16	tf_random_forest_100
584	584	random_forest_100	2.04002e+07	4516.66	0.405	1.0541	3033.23	tf_random_forest_100
585	585	random_forest_100	2.00424e+07	4476.87	0.4155	1.0531	3031.3	tf_random_forest_100
586	586	random_forest_100	2.05882e+07	4537.42	0.3996	1.0546	2985.39	tf_random_forest_100
587	587	random_forest_100	1.97292e+07	4441.76	0.4246	1.0523	2943.5	tf_random_forest_100
588	588	random_forest_100	1.94156e+07	4406.32	0.4338	1.0515	3008.74	tf_random_forest_100
589	589	random_forest_100	2.04166e+07	4518.47	0.4046	1.0541	3063.61	tf_random_forest_100
590	590	random_forest_100	2.00468e+07	4477.36	0.4154	1.0531	2952.47	tf_random_forest_100
591	591	random_forest_100	2.03216e+07	4507.94	0.4073	1.0539	3030.02	tf_random_forest_100
592	592	random_forest_100	1.98574e+07	4456.17	0.4209	1.0526	2982.82	tf_random_forest_100
593	593	random_forest_100	19044570	4364.01	0.4446	1.0505	2937.67	tf_random_forest_100
594	594	random_forest_100	2.0321e+07	4507.88	0.4074	1.0539	3048.02	tf_random_forest_100
595	595	random_forest_100	1.95464e+07	4421.13	0.4299	1.0518	3022.21	tf_random_forest_100
596	596	random_forest_100	2.01575e+07	4489.71	0.4121	1.0534	3037.79	tf_random_forest_100
597	597	random_forest_100	1.90291e+07	4362.23	0.445	1.0504	2914.24	tf_random_forest_100
598	598	random_forest_100	1.99652e+07	4468.24	0.4177	1.0529	3002.02	tf_random_forest_100
599	599	random_forest_100	1.96161e+07	4429.01	0.4279	1.052	2922.15	tf_random_forest_100
600	600	random_forest_1000	1.95448e+07	4420.95	0.43	1.0518	2954.75	tf_random_forest_1000
601	601	random_forest_1000	1.9625e+07	4430.02	0.4277	1.052	2964.35	tf_random_forest_1000
602	602	random_forest_1000	1.96468e+07	4432.47	0.427	1.0521	2968.15	tf_random_forest_1000
603	603	random_forest_1000	1.9736e+07	4442.53	0.4244	1.0523	2963.12	tf_random_forest_1000
604	604	random_forest_1000	1.93302e+07	4396.62	0.4363	1.0512	2946.89	tf_random_forest_1000
605	605	random_forest_1000	1.94672e+07	4412.16	0.4323	1.0516	2947.04	tf_random_forest_1000
606	606	random_forest_1000	1.95294e+07	4419.21	0.4304	1.0518	2972.4	tf_random_forest_1000
607	607	random_forest_1000	1.96379e+07	4431.47	0.4273	1.052	2947.86	tf_random_forest_1000
608	608	random_forest_1000	1.96235e+07	4429.84	0.4277	1.052	2936.64	tf_random_forest_1000
609	609	random_forest_1000	1.95392e+07	4420.32	0.4302	1.0518	2953.7	tf_random_forest_1000
610	610	random_forest_1000	1.9644e+07	4432.16	0.4271	1.0521	2952.91	tf_random_forest_1000
611	611	random_forest_1000	1.95234e+07	4418.52	0.4306	1.0517	2970.24	tf_random_forest_1000
612	612	random_forest_1000	1.98581e+07	4456.25	0.4209	1.0526	2961.39	tf_random_forest_1000
613	613	random_forest_1000	1.98993e+07	4460.86	0.4197	1.0527	2973.99	tf_random_forest_1000
614	614	random_forest_1000	1.96738e+07	4435.51	0.4262	1.0521	2974	tf_random_forest_1000
615	615	random_forest_1000	19555376	4422.15	0.4297	1.0518	2952.46	tf_random_forest_1000
616	616	random_forest_1000	1.95991e+07	4427.09	0.4284	1.0519	2954.11	tf_random_forest_1000
617	617	random_forest_1000	1.96671e+07	4434.76	0.4264	1.0521	2954.77	tf_random_forest_1000
618	618	random_forest_1000	1.94843e+07	4414.11	0.4318	1.0516	2955.21	tf_random_forest_1000
619	619	random_forest_1000	1.9797e+07	4449.39	0.4226	1.0525	2976.85	tf_random_forest_1000
620	620	random_forest_1000	1.95823e+07	4425.19	0.4289	1.0519	2979.01	tf_random_forest_1000
621	621	random_forest_1000	1.96515e+07	4433	0.4269	1.0521	2966.07	tf_random_forest_1000
622	622	random_forest_1000	1.9399e+07	4404.43	0.4342	1.0514	2945.24	tf_random_forest_1000
623	623	random_forest_1000	1.96717e+07	4435.28	0.4263	1.0521	2971.73	tf_random_forest_1000
624	624	random_forest_1000	1.96837e+07	4436.64	0.4259	1.0522	2971.28	tf_random_forest_1000
625	625	random_forest_1000	1.94735e+07	4412.88	0.4321	1.0516	2956.35	tf_random_forest_1000
626	626	random_forest_1000	1.94145e+07	4406.19	0.4338	1.0515	2965.51	tf_random_forest_1000
627	627	random_forest_1000	1.9899e+07	4460.83	0.4197	1.0527	2975.68	tf_random_forest_1000
628	628	random_forest_1000	1.95347e+07	4419.81	0.4303	1.0518	2961.28	tf_random_forest_1000
629	629	random_forest_1000	1.95988e+07	4427.05	0.4284	1.0519	2954.72	tf_random_forest_1000
630	630	random_forest_1000	1.94579e+07	4411.11	0.4325	1.0516	2937.82	tf_random_forest_1000
631	631	random_forest_1000	1.97877e+07	4448.34	0.4229	1.0524	2971.13	tf_random_forest_1000
632	632	random_forest_1000	1.95503e+07	4421.57	0.4298	1.0518	2951.48	tf_random_forest_1000
633	633	random_forest_1000	1.94467e+07	4409.85	0.4329	1.0515	2956.19	tf_random_forest_1000
634	634	random_forest_1000	1.95417e+07	4420.6	0.4301	1.0518	2955.73	tf_random_forest_1000
635	635	random_forest_1000	1.93786e+07	4402.11	0.4348	1.0514	2934	tf_random_forest_1000
636	636	random_forest_1000	1.96508e+07	4432.92	0.4269	1.0521	2966.68	tf_random_forest_1000
637	637	random_forest_1000	1.95305e+07	4419.33	0.4304	1.0518	2953.59	tf_random_forest_1000
638	638	random_forest_1000	1.9275e+07	4390.33	0.4379	1.0511	2930.17	tf_random_forest_1000
639	639	random_forest_1000	1.95967e+07	4426.82	0.4285	1.0519	2971.85	tf_random_forest_1000
640	640	random_forest_1000	1.97173e+07	4440.41	0.425	1.0523	2968.6	tf_random_forest_1000
641	641	random_forest_1000	1.95786e+07	4424.77	0.429	1.0519	2962.73	tf_random_forest_1000
642	642	random_forest_1000	1.97381e+07	4442.76	0.4244	1.0523	2972.34	tf_random_forest_1000
643	643	random_forest_1000	1.96849e+07	4436.76	0.4259	1.0522	2942.91	tf_random_forest_1000
644	644	random_forest_1000	1.96385e+07	4431.53	0.4273	1.052	2958.83	tf_random_forest_1000
645	645	random_forest_1000	1.96643e+07	4434.44	0.4265	1.0521	2978.1	tf_random_forest_1000
646	646	random_forest_1000	1.99552e+07	4467.12	0.418	1.0529	2983.24	tf_random_forest_1000
647	647	random_forest_1000	1.97463e+07	4443.68	0.4241	1.0523	2973.28	tf_random_forest_1000
648	648	random_forest_1000	1.98591e+07	4456.35	0.4208	1.0526	2964.4	tf_random_forest_1000
649	649	random_forest_1000	1.9605e+07	4427.75	0.4282	1.052	2971.62	tf_random_forest_1000
650	650	mlp_100	2.1803e+07	4669.37	0.3641	1.0578	3207.29	tf_mlp_100
651	651	mlp_100	21804917	4669.57	0.3641	1.0578	3208.86	tf_mlp_100
652	652	mlp_100	2.19346e+07	4683.44	0.3603	1.0581	3254.74	tf_mlp_100
653	653	mlp_100	2.19238e+07	4682.28	0.3606	1.0581	3254.09	tf_mlp_100
654	654	mlp_100	2.20386e+07	4694.53	0.3573	1.0584	3282.35	tf_mlp_100
655	655	mlp_100	2.17556e+07	4664.28	0.3655	1.0577	3189.87	tf_mlp_100
656	656	mlp_100	2.17593e+07	4664.68	0.3654	1.0577	3193.73	tf_mlp_100
657	657	mlp_100	2.20118e+07	4691.67	0.358	1.0583	3272.84	tf_mlp_100
658	658	mlp_100	2.19577e+07	4685.9	0.3596	1.0582	3258.71	tf_mlp_100
659	659	mlp_100	2.17935e+07	4668.35	0.3644	1.0578	3207.05	tf_mlp_100
660	660	mlp_100	2.20572e+07	4696.51	0.3567	1.0585	3284.14	tf_mlp_100
661	661	mlp_100	2.21095e+07	4702.07	0.3552	1.0586	3288.59	tf_mlp_100
662	662	mlp_100	2.17365e+07	4662.24	0.3661	1.0576	3187.73	tf_mlp_100
663	663	mlp_100	2.19285e+07	4682.79	0.3605	1.0581	3251.59	tf_mlp_100
664	664	mlp_100	2.20774e+07	4698.66	0.3561	1.0585	3283.57	tf_mlp_100
665	665	mlp_100	2.17733e+07	4666.19	0.365	1.0577	3199.94	tf_mlp_100
666	666	mlp_100	2.20797e+07	4698.9	0.3561	1.0585	3283.23	tf_mlp_100
667	667	mlp_100	2.19364e+07	4683.63	0.3602	1.0581	3252.63	tf_mlp_100
668	668	mlp_100	2.19787e+07	4688.15	0.359	1.0583	3265.49	tf_mlp_100
669	669	mlp_100	2.18914e+07	4678.82	0.3616	1.058	3240.88	tf_mlp_100
670	670	mlp_100	2.18521e+07	4674.63	0.3627	1.0579	3214.26	tf_mlp_100
671	671	mlp_100	2.19682e+07	4687.03	0.3593	1.0582	3266.39	tf_mlp_100
672	672	mlp_100	2.19184e+07	4681.71	0.3608	1.0581	3253.94	tf_mlp_100
673	673	mlp_100	2.19424e+07	4684.28	0.3601	1.0582	3258.34	tf_mlp_100
674	674	mlp_100	2.20771e+07	4698.62	0.3561	1.0585	3286.63	tf_mlp_100
675	675	mlp_100	2.20259e+07	4693.18	0.3576	1.0584	3281.21	tf_mlp_100
676	676	mlp_100	2.20617e+07	4696.99	0.3566	1.0585	3282.91	tf_mlp_100
677	677	mlp_100	2.17432e+07	4662.96	0.3659	1.0576	3190.83	tf_mlp_100
678	678	mlp_100	2.17311e+07	4661.66	0.3662	1.0576	3187.97	tf_mlp_100
679	679	mlp_100	2.17437e+07	4663.01	0.3659	1.0576	3191.68	tf_mlp_100
680	680	mlp_100	2.17466e+07	4663.33	0.3658	1.0576	3186.42	tf_mlp_100
681	681	mlp_100	2.19091e+07	4680.72	0.361	1.0581	3252.36	tf_mlp_100
682	682	mlp_100	2.20379e+07	4694.45	0.3573	1.0584	3282.3	tf_mlp_100
683	683	mlp_100	2.20971e+07	4700.76	0.3556	1.0586	3286.17	tf_mlp_100
684	684	mlp_100	2.19559e+07	4685.71	0.3597	1.0582	3258.66	tf_mlp_100
685	685	mlp_100	2.17794e+07	4666.84	0.3648	1.0577	3200.66	tf_mlp_100
686	686	mlp_100	2.21095e+07	4702.08	0.3552	1.0586	3292.8	tf_mlp_100
687	687	mlp_100	2.19687e+07	4687.08	0.3593	1.0582	3265.92	tf_mlp_100
688	688	mlp_100	2.17933e+07	4668.32	0.3644	1.0578	3206.77	tf_mlp_100
689	689	mlp_100	2.17604e+07	4664.81	0.3654	1.0577	3196.86	tf_mlp_100
690	690	mlp_100	2.20331e+07	4693.94	0.3574	1.0584	3281.35	tf_mlp_100
691	691	mlp_100	2.18408e+07	4673.41	0.363	1.0579	3215.92	tf_mlp_100
692	692	mlp_100	2.20872e+07	4699.7	0.3559	1.0585	3285.35	tf_mlp_100
693	693	mlp_100	2.19334e+07	4683.31	0.3603	1.0581	3257.98	tf_mlp_100
694	694	mlp_100	2.19322e+07	4683.18	0.3604	1.0581	3260.96	tf_mlp_100
695	695	mlp_100	2.17881e+07	4667.77	0.3646	1.0577	3204.52	tf_mlp_100
696	696	mlp_100	2.20488e+07	4695.62	0.357	1.0584	3283.55	tf_mlp_100
697	697	mlp_100	2.19177e+07	4681.63	0.3608	1.0581	3227.26	tf_mlp_100
698	698	mlp_100	2.17777e+07	4666.66	0.3649	1.0577	3203.86	tf_mlp_100
699	699	mlp_100	2.18345e+07	4672.74	0.3632	1.0579	3211.33	tf_mlp_100
700	700	mlp_100_50	2.36252e+07	4860.57	0.311	1.0626	3331.92	tf_mlp_100_50
701	701	mlp_100_50	2.36944e+07	4867.69	0.309	1.0628	3353.6	tf_mlp_100_50
702	702	mlp_100_50	2.35424e+07	4852.05	0.3134	1.0624	3319.54	tf_mlp_100_50
703	703	mlp_100_50	2.33614e+07	4833.37	0.3187	1.0619	3259.43	tf_mlp_100_50
704	704	mlp_100_50	2.33108e+07	4828.13	0.3202	1.0618	3269.67	tf_mlp_100_50
705	705	mlp_100_50	2.34504e+07	4842.56	0.3161	1.0622	3260.71	tf_mlp_100_50
706	706	mlp_100_50	2.34777e+07	4845.38	0.3153	1.0622	3271.62	tf_mlp_100_50
707	707	mlp_100_50	2.40091e+07	4899.9	0.2998	1.0636	3397.08	tf_mlp_100_50
708	708	mlp_100_50	2.35635e+07	4854.23	0.3128	1.0625	3306.51	tf_mlp_100_50
709	709	mlp_100_50	2.35701e+07	4854.91	0.3126	1.0625	3281.25	tf_mlp_100_50
710	710	mlp_100_50	2.35913e+07	4857.09	0.312	1.0625	3309.06	tf_mlp_100_50
711	711	mlp_100_50	2.37158e+07	4869.89	0.3084	1.0629	3296.16	tf_mlp_100_50
712	712	mlp_100_50	2.35666e+07	4854.55	0.3127	1.0625	3272.49	tf_mlp_100_50
713	713	mlp_100_50	2.3517e+07	4849.43	0.3142	1.0623	3274.44	tf_mlp_100_50
714	714	mlp_100_50	2.35951e+07	4857.48	0.3119	1.0625	3305.96	tf_mlp_100_50
715	715	mlp_100_50	2.36688e+07	4865.06	0.3097	1.0627	3328.34	tf_mlp_100_50
716	716	mlp_100_50	2.33065e+07	4827.68	0.3203	1.0618	3250.76	tf_mlp_100_50
717	717	mlp_100_50	2.35209e+07	4849.84	0.314	1.0623	3323.45	tf_mlp_100_50
718	718	mlp_100_50	2.39316e+07	4891.99	0.3021	1.0634	3364.72	tf_mlp_100_50
719	719	mlp_100_50	2.32621e+07	4823.08	0.3216	1.0617	3249.8	tf_mlp_100_50
720	720	mlp_100_50	2.40373e+07	4902.78	0.299	1.0637	3388.27	tf_mlp_100_50
721	721	mlp_100_50	2.35538e+07	4853.23	0.3131	1.0624	3283.94	tf_mlp_100_50
722	722	mlp_100_50	2.36059e+07	4858.59	0.3116	1.0626	3290.46	tf_mlp_100_50
723	723	mlp_100_50	2.36515e+07	4863.28	0.3102	1.0627	3367.81	tf_mlp_100_50
724	724	mlp_100_50	2.35412e+07	4851.92	0.3134	1.0624	3301.19	tf_mlp_100_50
725	725	mlp_100_50	2.34283e+07	4840.28	0.3167	1.0621	3262.19	tf_mlp_100_50
726	726	mlp_100_50	2.36325e+07	4861.32	0.3108	1.0626	3319.97	tf_mlp_100_50
727	727	mlp_100_50	2.36984e+07	4868.1	0.3089	1.0628	3335.72	tf_mlp_100_50
728	728	mlp_100_50	2.35482e+07	4852.64	0.3132	1.0624	3303.03	tf_mlp_100_50
729	729	mlp_100_50	2.34322e+07	4840.69	0.3166	1.0621	3268.28	tf_mlp_100_50
730	730	mlp_100_50	2.35486e+07	4852.69	0.3132	1.0624	3278.24	tf_mlp_100_50
731	731	mlp_100_50	2.35349e+07	4851.28	0.3136	1.0624	3280.45	tf_mlp_100_50
732	732	mlp_100_50	2.36461e+07	4862.73	0.3104	1.0627	3312.36	tf_mlp_100_50
733	733	mlp_100_50	2.36315e+07	4861.22	0.3108	1.0626	3325.99	tf_mlp_100_50
734	734	mlp_100_50	2.37336e+07	4871.71	0.3078	1.0629	3322.87	tf_mlp_100_50
735	735	mlp_100_50	2.33426e+07	4831.42	0.3192	1.0619	3254.67	tf_mlp_100_50
736	736	mlp_100_50	2.37258e+07	4870.91	0.3081	1.0629	3322.61	tf_mlp_100_50
737	737	mlp_100_50	2.32419e+07	4820.99	0.3222	1.0616	3245.16	tf_mlp_100_50
738	738	mlp_100_50	2.3744e+07	4872.78	0.3075	1.0629	3319.38	tf_mlp_100_50
739	739	mlp_100_50	2.34611e+07	4843.67	0.3158	1.0622	3280.01	tf_mlp_100_50
740	740	mlp_100_50	2.34608e+07	4843.63	0.3158	1.0622	3268.42	tf_mlp_100_50
741	741	mlp_100_50	2.36636e+07	4864.52	0.3099	1.0627	3322.8	tf_mlp_100_50
742	742	mlp_100_50	2.35592e+07	4853.79	0.3129	1.0624	3272.67	tf_mlp_100_50
743	743	mlp_100_50	2.34159e+07	4839	0.3171	1.0621	3261.63	tf_mlp_100_50
744	744	mlp_100_50	2.33658e+07	4833.82	0.3186	1.0619	3256.77	tf_mlp_100_50
745	745	mlp_100_50	2.41476e+07	4914.02	0.2958	1.064	3401.95	tf_mlp_100_50
746	746	mlp_100_50	2.33037e+07	4827.39	0.3204	1.0618	3239.68	tf_mlp_100_50
747	747	mlp_100_50	2.32305e+07	4819.81	0.3225	1.0616	3246.27	tf_mlp_100_50
748	748	mlp_100_50	2.33031e+07	4827.33	0.3204	1.0618	3254.99	tf_mlp_100_50
749	749	mlp_100_50	2.34413e+07	4841.62	0.3164	1.0621	3274.71	tf_mlp_100_50
750	750	mlp_100_100_50	2.39236e+07	4891.18	0.3023	1.0634	3313.32	tf_mlp_100_100_50
751	751	mlp_100_100_50	2.32095e+07	4817.63	0.3231	1.0615	3231.16	tf_mlp_100_100_50
752	752	mlp_100_100_50	2.32256e+07	4819.29	0.3227	1.0616	3198.84	tf_mlp_100_100_50
753	753	mlp_100_100_50	2.33834e+07	4835.64	0.318	1.062	3237.9	tf_mlp_100_100_50
754	754	mlp_100_100_50	2.30871e+07	4804.9	0.3267	1.0612	3183.27	tf_mlp_100_100_50
755	755	mlp_100_100_50	2.31087e+07	4807.15	0.3261	1.0612	3184.95	tf_mlp_100_100_50
756	756	mlp_100_100_50	2.31877e+07	4815.36	0.3238	1.0615	3223.71	tf_mlp_100_100_50
757	757	mlp_100_100_50	2.30624e+07	4802.33	0.3274	1.0611	3186.97	tf_mlp_100_100_50
758	758	mlp_100_100_50	2.31657e+07	4813.08	0.3244	1.0614	3178.93	tf_mlp_100_100_50
759	759	mlp_100_100_50	2.28951e+07	4784.88	0.3323	1.0607	3153.72	tf_mlp_100_100_50
760	760	mlp_100_100_50	2.31377e+07	4810.16	0.3252	1.0613	3201.45	tf_mlp_100_100_50
761	761	mlp_100_100_50	2.33315e+07	4830.27	0.3196	1.0618	3222.5	tf_mlp_100_100_50
762	762	mlp_100_100_50	2.32492e+07	4821.74	0.322	1.0616	3210.49	tf_mlp_100_100_50
763	763	mlp_100_100_50	2.30965e+07	4805.88	0.3264	1.0612	3185.85	tf_mlp_100_100_50
764	764	mlp_100_100_50	2.30617e+07	4802.26	0.3274	1.0611	3177.23	tf_mlp_100_100_50
765	765	mlp_100_100_50	2.31423e+07	4810.65	0.3251	1.0613	3205.78	tf_mlp_100_100_50
766	766	mlp_100_100_50	2.31398e+07	4810.38	0.3252	1.0613	3220.04	tf_mlp_100_100_50
767	767	mlp_100_100_50	2.32393e+07	4820.72	0.3223	1.0616	3214.02	tf_mlp_100_100_50
768	768	mlp_100_100_50	2.33721e+07	4834.47	0.3184	1.0619	3252.51	tf_mlp_100_100_50
769	769	mlp_100_100_50	2.30584e+07	4801.92	0.3275	1.0611	3206.96	tf_mlp_100_100_50
770	770	mlp_100_100_50	2.32767e+07	4824.59	0.3212	1.0617	3235.71	tf_mlp_100_100_50
771	771	mlp_100_100_50	2.32692e+07	4823.82	0.3214	1.0617	3206.69	tf_mlp_100_100_50
772	772	mlp_100_100_50	2.31045e+07	4806.71	0.3262	1.0612	3183.85	tf_mlp_100_100_50
773	773	mlp_100_100_50	2.31058e+07	4806.85	0.3261	1.0612	3185.33	tf_mlp_100_100_50
774	774	mlp_100_100_50	2.3132e+07	4809.58	0.3254	1.0613	3193.63	tf_mlp_100_100_50
775	775	mlp_100_100_50	2.31694e+07	4813.46	0.3243	1.0614	3185.85	tf_mlp_100_100_50
776	776	mlp_100_100_50	2.30634e+07	4802.43	0.3274	1.0611	3185.23	tf_mlp_100_100_50
777	777	mlp_100_100_50	2.30835e+07	4804.53	0.3268	1.0612	3190.16	tf_mlp_100_100_50
778	778	mlp_100_100_50	2.32019e+07	4816.83	0.3233	1.0615	3226.13	tf_mlp_100_100_50
779	779	mlp_100_100_50	2.33754e+07	4834.81	0.3183	1.062	3247.61	tf_mlp_100_100_50
780	780	mlp_100_100_50	2.32641e+07	4823.29	0.3215	1.0617	3202.62	tf_mlp_100_100_50
781	781	mlp_100_100_50	2.34264e+07	4840.08	0.3168	1.0621	3254.93	tf_mlp_100_100_50
782	782	mlp_100_100_50	2.32307e+07	4819.82	0.3225	1.0616	3219.9	tf_mlp_100_100_50
783	783	mlp_100_100_50	2.31421e+07	4810.62	0.3251	1.0613	3196.12	tf_mlp_100_100_50
784	784	mlp_100_100_50	2.32349e+07	4820.26	0.3224	1.0616	3219.54	tf_mlp_100_100_50
785	785	mlp_100_100_50	2.32574e+07	4822.59	0.3217	1.0616	3232.05	tf_mlp_100_100_50
786	786	mlp_100_100_50	2.34112e+07	4838.51	0.3172	1.062	3248.73	tf_mlp_100_100_50
787	787	mlp_100_100_50	2.31604e+07	4812.53	0.3246	1.0614	3192.89	tf_mlp_100_100_50
788	788	mlp_100_100_50	2.30532e+07	4801.37	0.3277	1.0611	3207.71	tf_mlp_100_100_50
789	789	mlp_100_100_50	2.32387e+07	4820.65	0.3223	1.0616	3205.71	tf_mlp_100_100_50
790	790	mlp_100_100_50	2.32994e+07	4826.94	0.3205	1.0618	3211.14	tf_mlp_100_100_50
791	791	mlp_100_100_50	2.32179e+07	4818.5	0.3229	1.0615	3198.61	tf_mlp_100_100_50
792	792	mlp_100_100_50	2.31846e+07	4815.04	0.3238	1.0614	3199.03	tf_mlp_100_100_50
793	793	mlp_100_100_50	2.30851e+07	4804.69	0.3267	1.0612	3187.13	tf_mlp_100_100_50
794	794	mlp_100_100_50	2.30282e+07	4798.77	0.3284	1.061	3203.25	tf_mlp_100_100_50
795	795	mlp_100_100_50	2.34013e+07	4837.49	0.3175	1.062	3239.52	tf_mlp_100_100_50
796	796	mlp_100_100_50	2.36061e+07	4858.61	0.3116	1.0626	3288.18	tf_mlp_100_100_50
797	797	mlp_100_100_50	2.38273e+07	4881.32	0.3051	1.0632	3293.76	tf_mlp_100_100_50
798	798	mlp_100_100_50	2.34442e+07	4841.92	0.3163	1.0621	3250.42	tf_mlp_100_100_50
799	799	mlp_100_100_50	2.3288e+07	4825.76	0.3208	1.0617	3237.86	tf_mlp_100_100_50
800	800	decision_tree	3.37206e+07	5806.95	0.0166	1.0894	3577.87	tf_decision_tree
801	801	decision_tree	3.15182e+07	5614.1	0.0808	1.0835	3472.52	tf_decision_tree
802	802	decision_tree	3.19848e+07	5655.51	0.0672	1.0848	3606.62	tf_decision_tree
803	803	decision_tree	3.00099e+07	5478.13	0.1248	1.0795	3343.07	tf_decision_tree
804	804	decision_tree	3.72753e+07	6105.35	-0.0871	1.0988	3995.09	tf_decision_tree
805	805	decision_tree	3.34197e+07	5780.98	0.0253	1.0886	3652.98	tf_decision_tree
806	806	decision_tree	3.0598e+07	5531.55	0.1076	1.0811	3421.19	tf_decision_tree
807	807	decision_tree	3.01023e+07	5486.56	0.1221	1.0798	3331.18	tf_decision_tree
808	808	decision_tree	3.25405e+07	5704.43	0.051	1.0862	3505.33	tf_decision_tree
809	809	decision_tree	3.14668e+07	5609.53	0.0823	1.0834	3407.29	tf_decision_tree
810	810	decision_tree	3.25485e+07	5705.13	0.0508	1.0863	3669.54	tf_decision_tree
811	811	decision_tree	3.34161e+07	5780.67	0.0255	1.0886	3639.74	tf_decision_tree
812	812	decision_tree	3.27535e+07	5723.06	0.0448	1.0868	3545.5	tf_decision_tree
813	813	decision_tree	3.17684e+07	5636.35	0.0735	1.0842	3556.65	tf_decision_tree
814	814	decision_tree	3.03898e+07	5512.7	0.1137	1.0805	3461.97	tf_decision_tree
815	815	decision_tree	3.06741e+07	5538.42	0.1054	1.0813	3457.26	tf_decision_tree
816	816	decision_tree	3.33184e+07	5772.21	0.0283	1.0883	3626.49	tf_decision_tree
817	817	decision_tree	3.40165e+07	5832.37	0.0079	1.0902	3664.09	tf_decision_tree
818	818	decision_tree	3.18389e+07	5642.6	0.0715	1.0844	3414.27	tf_decision_tree
819	819	decision_tree	3.24278e+07	5694.54	0.0543	1.0859	3479.14	tf_decision_tree
820	820	decision_tree	3.48677e+07	5904.89	-0.0169	1.0924	3649.36	tf_decision_tree
821	821	decision_tree	3.41446e+07	5843.34	0.0042	1.0905	3729.14	tf_decision_tree
822	822	decision_tree	3.08699e+07	5556.06	0.0997	1.0818	3373.13	tf_decision_tree
823	823	decision_tree	3.32859e+07	5769.39	0.0293	1.0882	3512.99	tf_decision_tree
824	824	decision_tree	3.29218e+07	5737.75	0.0399	1.0873	3714.24	tf_decision_tree
825	825	decision_tree	3.13119e+07	5595.71	0.0868	1.083	3387.47	tf_decision_tree
826	826	decision_tree	3.11633e+07	5582.41	0.0912	1.0826	3423.9	tf_decision_tree
827	827	decision_tree	3.68042e+07	6066.64	-0.0734	1.0975	3914.27	tf_decision_tree
828	828	decision_tree	3.22058e+07	5675.02	0.0608	1.0854	3427.81	tf_decision_tree
829	829	decision_tree	3.26262e+07	5711.93	0.0485	1.0865	3596.69	tf_decision_tree
830	830	decision_tree	3.63423e+07	6028.46	-0.0599	1.0963	3730.79	tf_decision_tree
831	831	decision_tree	3.28212e+07	5728.98	0.0428	1.087	3561.87	tf_decision_tree
832	832	decision_tree	3.44325e+07	5867.92	-0.0042	1.0913	3699.34	tf_decision_tree
833	833	decision_tree	3.29894e+07	5743.64	0.0379	1.0874	3598.34	tf_decision_tree
834	834	decision_tree	3.33515e+07	5775.08	0.0273	1.0884	3586.75	tf_decision_tree
835	835	decision_tree	2.95413e+07	5435.19	0.1385	1.0783	3323.51	tf_decision_tree
836	836	decision_tree	3.34929e+07	5787.31	0.0232	1.0888	3623.18	tf_decision_tree
837	837	decision_tree	3.21417e+07	5669.36	0.0626	1.0852	3558.61	tf_decision_tree
838	838	decision_tree	3.26235e+07	5711.7	0.0486	1.0865	3540.4	tf_decision_tree
839	839	decision_tree	4.26246e+07	6528.75	-0.2431	1.113	3783.17	tf_decision_tree
840	840	decision_tree	3.10118e+07	5568.82	0.0956	1.0822	3547.02	tf_decision_tree
841	841	decision_tree	3.43803e+07	5863.47	-0.0027	1.0911	3607.62	tf_decision_tree
842	842	decision_tree	3.20316e+07	5659.65	0.0658	1.0849	3677.46	tf_decision_tree
843	843	decision_tree	3.28686e+07	5733.12	0.0414	1.0871	3553.59	tf_decision_tree
844	844	decision_tree	3.39581e+07	5827.36	0.0096	1.09	3659.3	tf_decision_tree
845	845	decision_tree	3.51039e+07	5924.86	-0.0238	1.093	3773.84	tf_decision_tree
846	846	decision_tree	3.36317e+07	5799.29	0.0192	1.0891	3724.17	tf_decision_tree
847	847	decision_tree	3.4031e+07	5833.61	0.0075	1.0902	3633.11	tf_decision_tree
848	848	decision_tree	3.14166e+07	5605.05	0.0838	1.0833	3493.43	tf_decision_tree
849	849	decision_tree	3.43932e+07	5864.57	-0.003	1.0912	3638.08	tf_decision_tree
850	850	adaboost	2.38418e+07	4882.81	0.3047	1.0632	3944	tf_adaboost
851	851	adaboost	2.27653e+07	4771.3	0.3361	1.0603	3865.63	tf_adaboost
852	852	adaboost	2.43172e+07	4931.24	0.2908	1.0644	4044.41	tf_adaboost
853	853	adaboost	2.33221e+07	4829.29	0.3198	1.0618	3924.48	tf_adaboost
854	854	adaboost	2.59233e+07	5091.5	0.244	1.0687	3932.58	tf_adaboost
855	855	adaboost	2.50465e+07	5004.65	0.2695	1.0664	3982.51	tf_adaboost
856	856	adaboost	2.45482e+07	4954.62	0.2841	1.0651	4070.08	tf_adaboost
857	857	adaboost	2.26263e+07	4756.71	0.3401	1.06	3788.5	tf_adaboost
858	858	adaboost	2.49314e+07	4993.13	0.2729	1.0661	4010.86	tf_adaboost
859	859	adaboost	2.29208e+07	4787.57	0.3315	1.0607	3741.09	tf_adaboost
860	860	adaboost	2.27703e+07	4771.82	0.3359	1.0603	3822.92	tf_adaboost
861	861	adaboost	2.38832e+07	4887.04	0.3035	1.0633	3900.65	tf_adaboost
862	862	adaboost	2.27313e+07	4767.73	0.3371	1.0602	3917.68	tf_adaboost
863	863	adaboost	2.31273e+07	4809.08	0.3255	1.0613	3971.33	tf_adaboost
864	864	adaboost	2.48468e+07	4984.66	0.2754	1.0659	4075.44	tf_adaboost
865	865	adaboost	2.31632e+07	4812.82	0.3245	1.0614	3840.99	tf_adaboost
866	866	adaboost	2.23198e+07	4724.38	0.3491	1.0592	3762.94	tf_adaboost
867	867	adaboost	2.28837e+07	4783.69	0.3326	1.0606	3833.37	tf_adaboost
868	868	adaboost	2.18781e+07	4677.4	0.3619	1.058	3790.32	tf_adaboost
869	869	adaboost	2.2172e+07	4708.71	0.3534	1.0588	3826.83	tf_adaboost
870	870	adaboost	2.27338e+07	4767.99	0.337	1.0603	3833.78	tf_adaboost
871	871	adaboost	2.57347e+07	5072.94	0.2495	1.0682	4055.27	tf_adaboost
872	872	adaboost	2.4535e+07	4953.28	0.2845	1.065	3978.43	tf_adaboost
873	873	adaboost	2.37696e+07	4875.41	0.3068	1.063	3853.73	tf_adaboost
874	874	adaboost	2.40432e+07	4903.39	0.2988	1.0637	4000.73	tf_adaboost
875	875	adaboost	2.51745e+07	5017.42	0.2658	1.0667	3963.17	tf_adaboost
876	876	adaboost	2.24746e+07	4740.74	0.3446	1.0596	3763.25	tf_adaboost
877	877	adaboost	2.39461e+07	4893.47	0.3016	1.0635	3969.19	tf_adaboost
878	878	adaboost	2.38659e+07	4885.27	0.304	1.0633	3991.31	tf_adaboost
879	879	adaboost	2.47752e+07	4977.47	0.2775	1.0657	3965.9	tf_adaboost
880	880	adaboost	2.35939e+07	4857.35	0.3119	1.0625	3950.71	tf_adaboost
881	881	adaboost	2.33243e+07	4829.53	0.3198	1.0618	3888.42	tf_adaboost
882	882	adaboost	2.31245e+07	4808.79	0.3256	1.0613	3840.54	tf_adaboost
883	883	adaboost	2.44865e+07	4948.39	0.2859	1.0649	3994.87	tf_adaboost
884	884	adaboost	2.46893e+07	4968.83	0.28	1.0654	4052.99	tf_adaboost
885	885	adaboost	2.53279e+07	5032.69	0.2613	1.0671	4019.44	tf_adaboost
886	886	adaboost	2.43913e+07	4938.76	0.2887	1.0646	4016.58	tf_adaboost
887	887	adaboost	2.39996e+07	4898.94	0.3001	1.0636	4002.37	tf_adaboost
888	888	adaboost	2.28059e+07	4775.55	0.3349	1.0604	3919.65	tf_adaboost
889	889	adaboost	2.32311e+07	4819.86	0.3225	1.0616	3916.01	tf_adaboost
890	890	adaboost	2.3222e+07	4818.92	0.3228	1.0615	3873.49	tf_adaboost
891	891	adaboost	2.419e+07	4918.34	0.2945	1.0641	3952.6	tf_adaboost
892	892	adaboost	2.44887e+07	4948.6	0.2858	1.0649	4028.39	tf_adaboost
893	893	adaboost	2.53809e+07	5037.95	0.2598	1.0673	4076.27	tf_adaboost
894	894	adaboost	2.3015e+07	4797.4	0.3288	1.061	3859.77	tf_adaboost
895	895	adaboost	2.25023e+07	4743.66	0.3437	1.0596	3801.71	tf_adaboost
896	896	adaboost	2.30545e+07	4801.51	0.3276	1.0611	3840.7	tf_adaboost
897	897	adaboost	2.32947e+07	4826.45	0.3206	1.0617	3853	tf_adaboost
898	898	adaboost	2.39238e+07	4891.19	0.3023	1.0634	3964.88	tf_adaboost
899	899	adaboost	2.33744e+07	4834.7	0.3183	1.062	3942.75	tf_adaboost
900	900	bagging	2.23276e+07	4725.21	0.3488	1.0592	3217.43	tf_bagging
901	901	bagging	2.08196e+07	4562.86	0.3928	1.0552	3079.03	tf_bagging
902	902	bagging	2.20638e+07	4697.22	0.3565	1.0585	3205.61	tf_bagging
903	903	bagging	2.28135e+07	4776.34	0.3347	1.0605	3201.3	tf_bagging
904	904	bagging	2.28051e+07	4775.47	0.3349	1.0604	3312.22	tf_bagging
905	905	bagging	1.93596e+07	4399.95	0.4354	1.0513	2885.64	tf_bagging
906	906	bagging	2.06963e+07	4549.32	0.3964	1.0549	2949.85	tf_bagging
907	907	bagging	2.29045e+07	4785.86	0.332	1.0607	3289.6	tf_bagging
908	908	bagging	2.20483e+07	4695.56	0.357	1.0584	3168.26	tf_bagging
909	909	bagging	2.35341e+07	4851.2	0.3137	1.0624	3141.96	tf_bagging
910	910	bagging	2.01304e+07	4486.69	0.4129	1.0534	3011.55	tf_bagging
911	911	bagging	2.2685e+07	4762.88	0.3384	1.0601	3219.73	tf_bagging
912	912	bagging	1.99252e+07	4463.76	0.4189	1.0528	3012.54	tf_bagging
913	913	bagging	2.00835e+07	4481.46	0.4143	1.0532	3056.45	tf_bagging
914	914	bagging	2.19306e+07	4683.01	0.3604	1.0581	3220.83	tf_bagging
915	915	bagging	2.14813e+07	4634.79	0.3735	1.0569	3100.21	tf_bagging
916	916	bagging	2.01094e+07	4484.35	0.4135	1.0533	3000.12	tf_bagging
917	917	bagging	2.21159e+07	4702.75	0.355	1.0586	3284.6	tf_bagging
918	918	bagging	2.09335e+07	4575.32	0.3895	1.0555	3099.52	tf_bagging
919	919	bagging	2.13121e+07	4616.51	0.3785	1.0565	3012.05	tf_bagging
920	920	bagging	2.40699e+07	4906.11	0.298	1.0638	3173.57	tf_bagging
921	921	bagging	2.15747e+07	4644.86	0.3708	1.0572	3089.33	tf_bagging
922	922	bagging	2.27511e+07	4769.81	0.3365	1.0603	3231.07	tf_bagging
923	923	bagging	2.24364e+07	4736.7	0.3457	1.0595	3176.96	tf_bagging
924	924	bagging	1.95961e+07	4426.75	0.4285	1.0519	3010.09	tf_bagging
925	925	bagging	1.93298e+07	4396.56	0.4363	1.0512	2952	tf_bagging
926	926	bagging	2.19808e+07	4688.37	0.359	1.0583	3145.89	tf_bagging
927	927	bagging	2.05977e+07	4538.47	0.3993	1.0546	3040.09	tf_bagging
928	928	bagging	2.53105e+07	5030.95	0.2618	1.0671	3369.27	tf_bagging
929	929	bagging	2.06938e+07	4549.04	0.3965	1.0548	3080.29	tf_bagging
930	930	bagging	2.3216e+07	4818.29	0.3229	1.0615	3369.68	tf_bagging
931	931	bagging	2.09785e+07	4580.22	0.3882	1.0556	3139.33	tf_bagging
932	932	bagging	2.32158e+07	4818.28	0.3229	1.0615	3393.79	tf_bagging
933	933	bagging	1.98096e+07	4450.8	0.4223	1.0525	2861.95	tf_bagging
934	934	bagging	2.13957e+07	4625.54	0.376	1.0567	3127.97	tf_bagging
935	935	bagging	1.92231e+07	4384.42	0.4394	1.0509	2923.76	tf_bagging
936	936	bagging	2.30857e+07	4804.75	0.3267	1.0612	3314.05	tf_bagging
937	937	bagging	2.26758e+07	4761.91	0.3387	1.0601	3166.19	tf_bagging
938	938	bagging	2.17418e+07	4662.81	0.3659	1.0576	3101.94	tf_bagging
939	939	bagging	2.00448e+07	4477.14	0.4154	1.0531	2962.76	tf_bagging
940	940	bagging	2.2979e+07	4793.64	0.3298	1.0609	3227.56	tf_bagging
941	941	bagging	2.29355e+07	4789.1	0.3311	1.0608	3152.84	tf_bagging
942	942	bagging	2.25636e+07	4750.11	0.342	1.0598	3199.32	tf_bagging
943	943	bagging	2.12502e+07	4609.79	0.3803	1.0563	3143.19	tf_bagging
944	944	bagging	2.12823e+07	4613.27	0.3793	1.0564	3237.23	tf_bagging
945	945	bagging	1.85778e+07	4310.2	0.4582	1.0492	2913.45	tf_bagging
946	946	bagging	1.99287e+07	4464.15	0.4188	1.0528	3021.1	tf_bagging
947	947	bagging	2.09477e+07	4576.86	0.3891	1.0555	3098.45	tf_bagging
948	948	bagging	2.17347e+07	4662.05	0.3661	1.0576	3050.87	tf_bagging
949	949	bagging	2.49198e+07	4991.97	0.2732	1.066	3256.66	tf_bagging
950	950	extra_trees	1.87369e+07	4328.62	0.4536	1.0497	2777.71	tf_extra_trees
951	951	extra_trees	1.802e+07	4244.99	0.4745	1.0478	2707.2	tf_extra_trees
952	952	extra_trees	1.94305e+07	4408	0.4333	1.0515	2786.18	tf_extra_trees
953	953	extra_trees	1.96266e+07	4430.2	0.4276	1.052	2811.44	tf_extra_trees
954	954	extra_trees	1.91652e+07	4377.8	0.4411	1.0508	2786.36	tf_extra_trees
955	955	extra_trees	1.87241e+07	4327.14	0.4539	1.0496	2788.96	tf_extra_trees
956	956	extra_trees	1.90726e+07	4367.22	0.4438	1.0505	2804.09	tf_extra_trees
957	957	extra_trees	1.93115e+07	4394.49	0.4368	1.0512	2777.48	tf_extra_trees
958	958	extra_trees	1.88454e+07	4341.13	0.4504	1.0499	2740.5	tf_extra_trees
959	959	extra_trees	1.91763e+07	4379.08	0.4407	1.0508	2771.71	tf_extra_trees
960	960	extra_trees	1.87162e+07	4326.23	0.4542	1.0496	2736.59	tf_extra_trees
961	961	extra_trees	1.80036e+07	4243.06	0.4749	1.0477	2727.15	tf_extra_trees
962	962	extra_trees	1.905e+07	4364.63	0.4444	1.0505	2743.39	tf_extra_trees
963	963	extra_trees	1.88444e+07	4341.01	0.4504	1.0499	2721.61	tf_extra_trees
964	964	extra_trees	1.91894e+07	4380.57	0.4404	1.0509	2764.24	tf_extra_trees
965	965	extra_trees	1.96617e+07	4434.15	0.4266	1.0521	2818.36	tf_extra_trees
966	966	extra_trees	1.87682e+07	4332.22	0.4526	1.0497	2770.82	tf_extra_trees
967	967	extra_trees	1.91915e+07	4380.81	0.4403	1.0509	2805.05	tf_extra_trees
968	968	extra_trees	1.8749e+07	4330.02	0.4532	1.0497	2753.78	tf_extra_trees
969	969	extra_trees	1.9266e+07	4389.3	0.4381	1.0511	2767.79	tf_extra_trees
970	970	extra_trees	1.8807e+07	4336.7	0.4515	1.0498	2802.53	tf_extra_trees
971	971	extra_trees	1.86401e+07	4317.42	0.4564	1.0494	2765.01	tf_extra_trees
972	972	extra_trees	1.84669e+07	4297.31	0.4614	1.0489	2692.78	tf_extra_trees
973	973	extra_trees	1.90472e+07	4364.31	0.4445	1.0505	2786.34	tf_extra_trees
974	974	extra_trees	1.85834e+07	4310.85	0.458	1.0493	2705.39	tf_extra_trees
975	975	extra_trees	1.87256e+07	4327.31	0.4539	1.0496	2766.85	tf_extra_trees
976	976	extra_trees	1.92943e+07	4392.52	0.4373	1.0511	2816.36	tf_extra_trees
977	977	extra_trees	1.86425e+07	4317.7	0.4563	1.0494	2742.44	tf_extra_trees
978	978	extra_trees	1.88782e+07	4344.91	0.4494	1.05	2780.91	tf_extra_trees
979	979	extra_trees	1.86179e+07	4314.85	0.457	1.0493	2712.51	tf_extra_trees
980	980	extra_trees	1.90371e+07	4363.15	0.4448	1.0505	2788.27	tf_extra_trees
981	981	extra_trees	1.90138e+07	4360.49	0.4455	1.0504	2771.76	tf_extra_trees
982	982	extra_trees	1.86811e+07	4322.17	0.4552	1.0495	2750.62	tf_extra_trees
983	983	extra_trees	1.93899e+07	4403.4	0.4345	1.0514	2757.53	tf_extra_trees
984	984	extra_trees	1.88203e+07	4338.24	0.4511	1.0499	2764.56	tf_extra_trees
985	985	extra_trees	1.87779e+07	4333.34	0.4524	1.0498	2749.65	tf_extra_trees
986	986	extra_trees	1.88477e+07	4341.39	0.4503	1.05	2814.87	tf_extra_trees
987	987	extra_trees	1.89366e+07	4351.62	0.4477	1.0502	2776.32	tf_extra_trees
988	988	extra_trees	1.88477e+07	4341.4	0.4503	1.05	2765.43	tf_extra_trees
989	989	extra_trees	1.9461e+07	4411.46	0.4324	1.0516	2757.45	tf_extra_trees
990	990	extra_trees	1.80832e+07	4252.43	0.4726	1.0479	2685.83	tf_extra_trees
991	991	extra_trees	1.8504e+07	4301.62	0.4604	1.049	2734.23	tf_extra_trees
992	992	extra_trees	1.84504e+07	4295.39	0.4619	1.0489	2769.74	tf_extra_trees
993	993	extra_trees	1.90049e+07	4359.46	0.4457	1.0504	2739.45	tf_extra_trees
994	994	extra_trees	1.82509e+07	4272.1	0.4677	1.0484	2700.03	tf_extra_trees
995	995	extra_trees	1.8942e+07	4352.24	0.4476	1.0502	2816.29	tf_extra_trees
996	996	extra_trees	1.95972e+07	4426.87	0.4285	1.0519	2802.29	tf_extra_trees
997	997	extra_trees	1.88364e+07	4340.09	0.4507	1.0499	2710.56	tf_extra_trees
998	998	extra_trees	1.84568e+07	4296.14	0.4617	1.0489	2771.1	tf_extra_trees
999	999	extra_trees	1.82281e+07	4269.44	0.4684	1.0483	2755.22	tf_extra_trees
1000	1000	gradient_boosting	1.94749e+07	4413.04	0.432	1.0516	3004.74	tf_gradient_boosting
1001	1001	gradient_boosting	1.91168e+07	4372.28	0.4425	1.0507	2980.65	tf_gradient_boosting
1002	1002	gradient_boosting	1.96033e+07	4427.56	0.4283	1.052	3032.78	tf_gradient_boosting
1003	1003	gradient_boosting	1.97896e+07	4448.55	0.4229	1.0524	3024.02	tf_gradient_boosting
1004	1004	gradient_boosting	1.9856e+07	4456.01	0.4209	1.0526	3015.3	tf_gradient_boosting
1005	1005	gradient_boosting	1.95076e+07	4416.74	0.4311	1.0517	3006.36	tf_gradient_boosting
1006	1006	gradient_boosting	2.02043e+07	4494.91	0.4108	1.0535	3051.16	tf_gradient_boosting
1007	1007	gradient_boosting	1.92903e+07	4392.07	0.4374	1.0511	2968.27	tf_gradient_boosting
1008	1008	gradient_boosting	2.0016e+07	4473.92	0.4163	1.053	3023.88	tf_gradient_boosting
1009	1009	gradient_boosting	1.96278e+07	4430.32	0.4276	1.052	3007.35	tf_gradient_boosting
1010	1010	gradient_boosting	1.98349e+07	4453.64	0.4215	1.0526	3044.39	tf_gradient_boosting
1011	1011	gradient_boosting	2.01825e+07	4492.5	0.4114	1.0535	3068.85	tf_gradient_boosting
1012	1012	gradient_boosting	1.94768e+07	4413.25	0.432	1.0516	3006.1	tf_gradient_boosting
1013	1013	gradient_boosting	1.96656e+07	4434.59	0.4265	1.0521	3017.31	tf_gradient_boosting
1014	1014	gradient_boosting	1.94449e+07	4409.64	0.4329	1.0515	2977.23	tf_gradient_boosting
1015	1015	gradient_boosting	1.94794e+07	4413.55	0.4319	1.0516	2986.88	tf_gradient_boosting
1016	1016	gradient_boosting	1.97067e+07	4439.22	0.4253	1.0522	3024.61	tf_gradient_boosting
1017	1017	gradient_boosting	1.98782e+07	4458.5	0.4203	1.0527	3023.96	tf_gradient_boosting
1018	1018	gradient_boosting	1.92532e+07	4387.85	0.4385	1.051	2975.56	tf_gradient_boosting
1019	1019	gradient_boosting	1.95574e+07	4422.37	0.4296	1.0518	3018.76	tf_gradient_boosting
1020	1020	gradient_boosting	1.94041e+07	4405.01	0.4341	1.0514	2969.02	tf_gradient_boosting
1021	1021	gradient_boosting	1.9383e+07	4402.61	0.4347	1.0514	3015.36	tf_gradient_boosting
1022	1022	gradient_boosting	1.99093e+07	4461.99	0.4194	1.0528	3036.37	tf_gradient_boosting
1023	1023	gradient_boosting	1.99171e+07	4462.85	0.4191	1.0528	3029.71	tf_gradient_boosting
1024	1024	gradient_boosting	1.98546e+07	4455.86	0.421	1.0526	3002.76	tf_gradient_boosting
1025	1025	gradient_boosting	1.97465e+07	4443.71	0.4241	1.0523	3004.07	tf_gradient_boosting
1026	1026	gradient_boosting	1.95463e+07	4421.12	0.43	1.0518	2994.65	tf_gradient_boosting
1027	1027	gradient_boosting	1.94577e+07	4411.09	0.4325	1.0516	3007.5	tf_gradient_boosting
1028	1028	gradient_boosting	1.94559e+07	4410.89	0.4326	1.0516	2996.42	tf_gradient_boosting
1029	1029	gradient_boosting	1.93307e+07	4396.66	0.4362	1.0512	2994.81	tf_gradient_boosting
1030	1030	gradient_boosting	2.03138e+07	4507.09	0.4076	1.0538	3023.39	tf_gradient_boosting
1031	1031	gradient_boosting	1.93847e+07	4402.81	0.4347	1.0514	2980.68	tf_gradient_boosting
1032	1032	gradient_boosting	1.95712e+07	4423.94	0.4292	1.0519	3020.67	tf_gradient_boosting
1033	1033	gradient_boosting	1.94394e+07	4409.02	0.4331	1.0515	3003.38	tf_gradient_boosting
1034	1034	gradient_boosting	2.02879e+07	4504.21	0.4083	1.0538	3050.67	tf_gradient_boosting
1035	1035	gradient_boosting	1.94196e+07	4406.76	0.4336	1.0515	3015.39	tf_gradient_boosting
1036	1036	gradient_boosting	1.90917e+07	4369.4	0.4432	1.0506	2983.94	tf_gradient_boosting
1037	1037	gradient_boosting	1.90473e+07	4364.32	0.4445	1.0505	2964.24	tf_gradient_boosting
1038	1038	gradient_boosting	1.92355e+07	4385.83	0.439	1.051	2988.32	tf_gradient_boosting
1039	1039	gradient_boosting	1.96063e+07	4427.9	0.4282	1.052	2989.83	tf_gradient_boosting
1040	1040	gradient_boosting	1.95607e+07	4422.75	0.4295	1.0518	3012.48	tf_gradient_boosting
1041	1041	gradient_boosting	2.00659e+07	4479.49	0.4148	1.0532	3046.65	tf_gradient_boosting
1042	1042	gradient_boosting	1.98212e+07	4452.1	0.4219	1.0525	3031.61	tf_gradient_boosting
1043	1043	gradient_boosting	1.91651e+07	4377.8	0.4411	1.0508	2967.35	tf_gradient_boosting
1044	1044	gradient_boosting	1.93595e+07	4399.94	0.4354	1.0513	2994.52	tf_gradient_boosting
1045	1045	gradient_boosting	2.01579e+07	4489.75	0.4121	1.0534	3053.86	tf_gradient_boosting
1046	1046	gradient_boosting	1.97167e+07	4440.35	0.425	1.0523	3029.68	tf_gradient_boosting
1047	1047	gradient_boosting	1.91513e+07	4376.22	0.4415	1.0508	2980.1	tf_gradient_boosting
1048	1048	gradient_boosting	1.9268e+07	4389.53	0.4381	1.0511	2971.41	tf_gradient_boosting
1049	1049	gradient_boosting	1.98082e+07	4450.64	0.4223	1.0525	3022.17	tf_gradient_boosting
0	0	linear_regression	2.9039e+07	5388.78	0.2206	1.0708	3861.83	tf_linear_regression
1	1	linear_regression	2.9039e+07	5388.78	0.2206	1.0708	3861.83	tf_linear_regression
2	2	linear_regression	2.9039e+07	5388.78	0.2206	1.0708	3861.83	tf_linear_regression
3	3	linear_regression	2.9039e+07	5388.78	0.2206	1.0708	3861.83	tf_linear_regression
4	4	linear_regression	2.9039e+07	5388.78	0.2206	1.0708	3861.83	tf_linear_regression
5	5	linear_regression	2.9039e+07	5388.78	0.2206	1.0708	3861.83	tf_linear_regression
6	6	linear_regression	2.9039e+07	5388.78	0.2206	1.0708	3861.83	tf_linear_regression
7	7	linear_regression	2.9039e+07	5388.78	0.2206	1.0708	3861.83	tf_linear_regression
8	8	linear_regression	2.9039e+07	5388.78	0.2206	1.0708	3861.83	tf_linear_regression
9	9	linear_regression	2.9039e+07	5388.78	0.2206	1.0708	3861.83	tf_linear_regression
10	10	linear_regression	2.9039e+07	5388.78	0.2206	1.0708	3861.83	tf_linear_regression
11	11	linear_regression	2.9039e+07	5388.78	0.2206	1.0708	3861.83	tf_linear_regression
12	12	linear_regression	2.9039e+07	5388.78	0.2206	1.0708	3861.83	tf_linear_regression
13	13	linear_regression	2.9039e+07	5388.78	0.2206	1.0708	3861.83	tf_linear_regression
14	14	linear_regression	2.9039e+07	5388.78	0.2206	1.0708	3861.83	tf_linear_regression
15	15	linear_regression	2.9039e+07	5388.78	0.2206	1.0708	3861.83	tf_linear_regression
16	16	linear_regression	2.9039e+07	5388.78	0.2206	1.0708	3861.83	tf_linear_regression
17	17	linear_regression	2.9039e+07	5388.78	0.2206	1.0708	3861.83	tf_linear_regression
18	18	linear_regression	2.9039e+07	5388.78	0.2206	1.0708	3861.83	tf_linear_regression
19	19	linear_regression	2.9039e+07	5388.78	0.2206	1.0708	3861.83	tf_linear_regression
20	20	linear_regression	2.9039e+07	5388.78	0.2206	1.0708	3861.83	tf_linear_regression
21	21	linear_regression	2.9039e+07	5388.78	0.2206	1.0708	3861.83	tf_linear_regression
22	22	linear_regression	2.9039e+07	5388.78	0.2206	1.0708	3861.83	tf_linear_regression
23	23	linear_regression	2.9039e+07	5388.78	0.2206	1.0708	3861.83	tf_linear_regression
24	24	linear_regression	2.9039e+07	5388.78	0.2206	1.0708	3861.83	tf_linear_regression
25	25	linear_regression	2.9039e+07	5388.78	0.2206	1.0708	3861.83	tf_linear_regression
26	26	linear_regression	2.9039e+07	5388.78	0.2206	1.0708	3861.83	tf_linear_regression
27	27	linear_regression	2.9039e+07	5388.78	0.2206	1.0708	3861.83	tf_linear_regression
28	28	linear_regression	2.9039e+07	5388.78	0.2206	1.0708	3861.83	tf_linear_regression
29	29	linear_regression	2.9039e+07	5388.78	0.2206	1.0708	3861.83	tf_linear_regression
30	30	linear_regression	2.9039e+07	5388.78	0.2206	1.0708	3861.83	tf_linear_regression
31	31	linear_regression	2.9039e+07	5388.78	0.2206	1.0708	3861.83	tf_linear_regression
32	32	linear_regression	2.9039e+07	5388.78	0.2206	1.0708	3861.83	tf_linear_regression
33	33	linear_regression	2.9039e+07	5388.78	0.2206	1.0708	3861.83	tf_linear_regression
34	34	linear_regression	2.9039e+07	5388.78	0.2206	1.0708	3861.83	tf_linear_regression
35	35	linear_regression	2.9039e+07	5388.78	0.2206	1.0708	3861.83	tf_linear_regression
36	36	linear_regression	2.9039e+07	5388.78	0.2206	1.0708	3861.83	tf_linear_regression
37	37	linear_regression	2.9039e+07	5388.78	0.2206	1.0708	3861.83	tf_linear_regression
38	38	linear_regression	2.9039e+07	5388.78	0.2206	1.0708	3861.83	tf_linear_regression
39	39	linear_regression	2.9039e+07	5388.78	0.2206	1.0708	3861.83	tf_linear_regression
40	40	linear_regression	2.9039e+07	5388.78	0.2206	1.0708	3861.83	tf_linear_regression
41	41	linear_regression	2.9039e+07	5388.78	0.2206	1.0708	3861.83	tf_linear_regression
42	42	linear_regression	2.9039e+07	5388.78	0.2206	1.0708	3861.83	tf_linear_regression
43	43	linear_regression	2.9039e+07	5388.78	0.2206	1.0708	3861.83	tf_linear_regression
44	44	linear_regression	2.9039e+07	5388.78	0.2206	1.0708	3861.83	tf_linear_regression
45	45	linear_regression	2.9039e+07	5388.78	0.2206	1.0708	3861.83	tf_linear_regression
46	46	linear_regression	2.9039e+07	5388.78	0.2206	1.0708	3861.83	tf_linear_regression
47	47	linear_regression	2.9039e+07	5388.78	0.2206	1.0708	3861.83	tf_linear_regression
48	48	linear_regression	2.9039e+07	5388.78	0.2206	1.0708	3861.83	tf_linear_regression
49	49	linear_regression	2.9039e+07	5388.78	0.2206	1.0708	3861.83	tf_linear_regression
50	50	svr_linear	2.90424e+07	5389.1	0.2206	1.0708	3636.9	tf_svr_linear
51	51	svr_linear	2.90424e+07	5389.1	0.2206	1.0708	3636.9	tf_svr_linear
52	52	svr_linear	2.90424e+07	5389.1	0.2206	1.0708	3636.9	tf_svr_linear
53	53	svr_linear	2.90424e+07	5389.1	0.2206	1.0708	3636.9	tf_svr_linear
54	54	svr_linear	2.90424e+07	5389.1	0.2206	1.0708	3636.9	tf_svr_linear
55	55	svr_linear	2.90424e+07	5389.1	0.2206	1.0708	3636.9	tf_svr_linear
56	56	svr_linear	2.90424e+07	5389.1	0.2206	1.0708	3636.9	tf_svr_linear
57	57	svr_linear	2.90424e+07	5389.1	0.2206	1.0708	3636.9	tf_svr_linear
58	58	svr_linear	2.90424e+07	5389.1	0.2206	1.0708	3636.9	tf_svr_linear
59	59	svr_linear	2.90424e+07	5389.1	0.2206	1.0708	3636.9	tf_svr_linear
60	60	svr_linear	2.90424e+07	5389.1	0.2206	1.0708	3636.9	tf_svr_linear
61	61	svr_linear	2.90424e+07	5389.1	0.2206	1.0708	3636.9	tf_svr_linear
62	62	svr_linear	2.90424e+07	5389.1	0.2206	1.0708	3636.9	tf_svr_linear
63	63	svr_linear	2.90424e+07	5389.1	0.2206	1.0708	3636.9	tf_svr_linear
64	64	svr_linear	2.90424e+07	5389.1	0.2206	1.0708	3636.9	tf_svr_linear
65	65	svr_linear	2.90424e+07	5389.1	0.2206	1.0708	3636.9	tf_svr_linear
66	66	svr_linear	2.90424e+07	5389.1	0.2206	1.0708	3636.9	tf_svr_linear
67	67	svr_linear	2.90424e+07	5389.1	0.2206	1.0708	3636.9	tf_svr_linear
68	68	svr_linear	2.90424e+07	5389.1	0.2206	1.0708	3636.9	tf_svr_linear
69	69	svr_linear	2.90424e+07	5389.1	0.2206	1.0708	3636.9	tf_svr_linear
70	70	svr_linear	2.90424e+07	5389.1	0.2206	1.0708	3636.9	tf_svr_linear
71	71	svr_linear	2.90424e+07	5389.1	0.2206	1.0708	3636.9	tf_svr_linear
72	72	svr_linear	2.90424e+07	5389.1	0.2206	1.0708	3636.9	tf_svr_linear
73	73	svr_linear	2.90424e+07	5389.1	0.2206	1.0708	3636.9	tf_svr_linear
74	74	svr_linear	2.90424e+07	5389.1	0.2206	1.0708	3636.9	tf_svr_linear
75	75	svr_linear	2.90424e+07	5389.1	0.2206	1.0708	3636.9	tf_svr_linear
76	76	svr_linear	2.90424e+07	5389.1	0.2206	1.0708	3636.9	tf_svr_linear
77	77	svr_linear	2.90424e+07	5389.1	0.2206	1.0708	3636.9	tf_svr_linear
78	78	svr_linear	2.90424e+07	5389.1	0.2206	1.0708	3636.9	tf_svr_linear
79	79	svr_linear	2.90424e+07	5389.1	0.2206	1.0708	3636.9	tf_svr_linear
80	80	svr_linear	2.90424e+07	5389.1	0.2206	1.0708	3636.9	tf_svr_linear
81	81	svr_linear	2.90424e+07	5389.1	0.2206	1.0708	3636.9	tf_svr_linear
82	82	svr_linear	2.90424e+07	5389.1	0.2206	1.0708	3636.9	tf_svr_linear
83	83	svr_linear	2.90424e+07	5389.1	0.2206	1.0708	3636.9	tf_svr_linear
84	84	svr_linear	2.90424e+07	5389.1	0.2206	1.0708	3636.9	tf_svr_linear
85	85	svr_linear	2.90424e+07	5389.1	0.2206	1.0708	3636.9	tf_svr_linear
86	86	svr_linear	2.90424e+07	5389.1	0.2206	1.0708	3636.9	tf_svr_linear
87	87	svr_linear	2.90424e+07	5389.1	0.2206	1.0708	3636.9	tf_svr_linear
88	88	svr_linear	2.90424e+07	5389.1	0.2206	1.0708	3636.9	tf_svr_linear
89	89	svr_linear	2.90424e+07	5389.1	0.2206	1.0708	3636.9	tf_svr_linear
90	90	svr_linear	2.90424e+07	5389.1	0.2206	1.0708	3636.9	tf_svr_linear
91	91	svr_linear	2.90424e+07	5389.1	0.2206	1.0708	3636.9	tf_svr_linear
92	92	svr_linear	2.90424e+07	5389.1	0.2206	1.0708	3636.9	tf_svr_linear
93	93	svr_linear	2.90424e+07	5389.1	0.2206	1.0708	3636.9	tf_svr_linear
94	94	svr_linear	2.90424e+07	5389.1	0.2206	1.0708	3636.9	tf_svr_linear
95	95	svr_linear	2.90424e+07	5389.1	0.2206	1.0708	3636.9	tf_svr_linear
96	96	svr_linear	2.90424e+07	5389.1	0.2206	1.0708	3636.9	tf_svr_linear
97	97	svr_linear	2.90424e+07	5389.1	0.2206	1.0708	3636.9	tf_svr_linear
98	98	svr_linear	2.90424e+07	5389.1	0.2206	1.0708	3636.9	tf_svr_linear
99	99	svr_linear	2.90424e+07	5389.1	0.2206	1.0708	3636.9	tf_svr_linear
100	100	svr_poly_2	4.12973e+07	6426.3	-0.1083	1.1007	4403.51	tf_svr_poly_2
101	101	svr_poly_2	4.12973e+07	6426.3	-0.1083	1.1007	4403.51	tf_svr_poly_2
102	102	svr_poly_2	4.12973e+07	6426.3	-0.1083	1.1007	4403.51	tf_svr_poly_2
103	103	svr_poly_2	4.12973e+07	6426.3	-0.1083	1.1007	4403.51	tf_svr_poly_2
104	104	svr_poly_2	4.12973e+07	6426.3	-0.1083	1.1007	4403.51	tf_svr_poly_2
105	105	svr_poly_2	4.12973e+07	6426.3	-0.1083	1.1007	4403.51	tf_svr_poly_2
106	106	svr_poly_2	4.12973e+07	6426.3	-0.1083	1.1007	4403.51	tf_svr_poly_2
107	107	svr_poly_2	4.12973e+07	6426.3	-0.1083	1.1007	4403.51	tf_svr_poly_2
108	108	svr_poly_2	4.12973e+07	6426.3	-0.1083	1.1007	4403.51	tf_svr_poly_2
109	109	svr_poly_2	4.12973e+07	6426.3	-0.1083	1.1007	4403.51	tf_svr_poly_2
110	110	svr_poly_2	4.12973e+07	6426.3	-0.1083	1.1007	4403.51	tf_svr_poly_2
111	111	svr_poly_2	4.12973e+07	6426.3	-0.1083	1.1007	4403.51	tf_svr_poly_2
112	112	svr_poly_2	4.12973e+07	6426.3	-0.1083	1.1007	4403.51	tf_svr_poly_2
113	113	svr_poly_2	4.12973e+07	6426.3	-0.1083	1.1007	4403.51	tf_svr_poly_2
114	114	svr_poly_2	4.12973e+07	6426.3	-0.1083	1.1007	4403.51	tf_svr_poly_2
115	115	svr_poly_2	4.12973e+07	6426.3	-0.1083	1.1007	4403.51	tf_svr_poly_2
116	116	svr_poly_2	4.12973e+07	6426.3	-0.1083	1.1007	4403.51	tf_svr_poly_2
117	117	svr_poly_2	4.12973e+07	6426.3	-0.1083	1.1007	4403.51	tf_svr_poly_2
118	118	svr_poly_2	4.12973e+07	6426.3	-0.1083	1.1007	4403.51	tf_svr_poly_2
119	119	svr_poly_2	4.12973e+07	6426.3	-0.1083	1.1007	4403.51	tf_svr_poly_2
120	120	svr_poly_2	4.12973e+07	6426.3	-0.1083	1.1007	4403.51	tf_svr_poly_2
121	121	svr_poly_2	4.12973e+07	6426.3	-0.1083	1.1007	4403.51	tf_svr_poly_2
122	122	svr_poly_2	4.12973e+07	6426.3	-0.1083	1.1007	4403.51	tf_svr_poly_2
123	123	svr_poly_2	4.12973e+07	6426.3	-0.1083	1.1007	4403.51	tf_svr_poly_2
124	124	svr_poly_2	4.12973e+07	6426.3	-0.1083	1.1007	4403.51	tf_svr_poly_2
125	125	svr_poly_2	4.12973e+07	6426.3	-0.1083	1.1007	4403.51	tf_svr_poly_2
126	126	svr_poly_2	4.12973e+07	6426.3	-0.1083	1.1007	4403.51	tf_svr_poly_2
127	127	svr_poly_2	4.12973e+07	6426.3	-0.1083	1.1007	4403.51	tf_svr_poly_2
128	128	svr_poly_2	4.12973e+07	6426.3	-0.1083	1.1007	4403.51	tf_svr_poly_2
129	129	svr_poly_2	4.12973e+07	6426.3	-0.1083	1.1007	4403.51	tf_svr_poly_2
130	130	svr_poly_2	4.12973e+07	6426.3	-0.1083	1.1007	4403.51	tf_svr_poly_2
131	131	svr_poly_2	4.12973e+07	6426.3	-0.1083	1.1007	4403.51	tf_svr_poly_2
132	132	svr_poly_2	4.12973e+07	6426.3	-0.1083	1.1007	4403.51	tf_svr_poly_2
133	133	svr_poly_2	4.12973e+07	6426.3	-0.1083	1.1007	4403.51	tf_svr_poly_2
134	134	svr_poly_2	4.12973e+07	6426.3	-0.1083	1.1007	4403.51	tf_svr_poly_2
135	135	svr_poly_2	4.12973e+07	6426.3	-0.1083	1.1007	4403.51	tf_svr_poly_2
136	136	svr_poly_2	4.12973e+07	6426.3	-0.1083	1.1007	4403.51	tf_svr_poly_2
137	137	svr_poly_2	4.12973e+07	6426.3	-0.1083	1.1007	4403.51	tf_svr_poly_2
138	138	svr_poly_2	4.12973e+07	6426.3	-0.1083	1.1007	4403.51	tf_svr_poly_2
139	139	svr_poly_2	4.12973e+07	6426.3	-0.1083	1.1007	4403.51	tf_svr_poly_2
140	140	svr_poly_2	4.12973e+07	6426.3	-0.1083	1.1007	4403.51	tf_svr_poly_2
141	141	svr_poly_2	4.12973e+07	6426.3	-0.1083	1.1007	4403.51	tf_svr_poly_2
142	142	svr_poly_2	4.12973e+07	6426.3	-0.1083	1.1007	4403.51	tf_svr_poly_2
143	143	svr_poly_2	4.12973e+07	6426.3	-0.1083	1.1007	4403.51	tf_svr_poly_2
144	144	svr_poly_2	4.12973e+07	6426.3	-0.1083	1.1007	4403.51	tf_svr_poly_2
145	145	svr_poly_2	4.12973e+07	6426.3	-0.1083	1.1007	4403.51	tf_svr_poly_2
146	146	svr_poly_2	4.12973e+07	6426.3	-0.1083	1.1007	4403.51	tf_svr_poly_2
147	147	svr_poly_2	4.12973e+07	6426.3	-0.1083	1.1007	4403.51	tf_svr_poly_2
148	148	svr_poly_2	4.12973e+07	6426.3	-0.1083	1.1007	4403.51	tf_svr_poly_2
149	149	svr_poly_2	4.12973e+07	6426.3	-0.1083	1.1007	4403.51	tf_svr_poly_2
150	150	svr_poly_3	4.12588e+07	6423.3	-0.1073	1.1006	4403.75	tf_svr_poly_3
151	151	svr_poly_3	4.12588e+07	6423.3	-0.1073	1.1006	4403.75	tf_svr_poly_3
152	152	svr_poly_3	4.12588e+07	6423.3	-0.1073	1.1006	4403.75	tf_svr_poly_3
153	153	svr_poly_3	4.12588e+07	6423.3	-0.1073	1.1006	4403.75	tf_svr_poly_3
154	154	svr_poly_3	4.12588e+07	6423.3	-0.1073	1.1006	4403.75	tf_svr_poly_3
155	155	svr_poly_3	4.12588e+07	6423.3	-0.1073	1.1006	4403.75	tf_svr_poly_3
156	156	svr_poly_3	4.12588e+07	6423.3	-0.1073	1.1006	4403.75	tf_svr_poly_3
157	157	svr_poly_3	4.12588e+07	6423.3	-0.1073	1.1006	4403.75	tf_svr_poly_3
158	158	svr_poly_3	4.12588e+07	6423.3	-0.1073	1.1006	4403.75	tf_svr_poly_3
159	159	svr_poly_3	4.12588e+07	6423.3	-0.1073	1.1006	4403.75	tf_svr_poly_3
160	160	svr_poly_3	4.12588e+07	6423.3	-0.1073	1.1006	4403.75	tf_svr_poly_3
161	161	svr_poly_3	4.12588e+07	6423.3	-0.1073	1.1006	4403.75	tf_svr_poly_3
162	162	svr_poly_3	4.12588e+07	6423.3	-0.1073	1.1006	4403.75	tf_svr_poly_3
163	163	svr_poly_3	4.12588e+07	6423.3	-0.1073	1.1006	4403.75	tf_svr_poly_3
164	164	svr_poly_3	4.12588e+07	6423.3	-0.1073	1.1006	4403.75	tf_svr_poly_3
165	165	svr_poly_3	4.12588e+07	6423.3	-0.1073	1.1006	4403.75	tf_svr_poly_3
166	166	svr_poly_3	4.12588e+07	6423.3	-0.1073	1.1006	4403.75	tf_svr_poly_3
167	167	svr_poly_3	4.12588e+07	6423.3	-0.1073	1.1006	4403.75	tf_svr_poly_3
168	168	svr_poly_3	4.12588e+07	6423.3	-0.1073	1.1006	4403.75	tf_svr_poly_3
169	169	svr_poly_3	4.12588e+07	6423.3	-0.1073	1.1006	4403.75	tf_svr_poly_3
170	170	svr_poly_3	4.12588e+07	6423.3	-0.1073	1.1006	4403.75	tf_svr_poly_3
171	171	svr_poly_3	4.12588e+07	6423.3	-0.1073	1.1006	4403.75	tf_svr_poly_3
172	172	svr_poly_3	4.12588e+07	6423.3	-0.1073	1.1006	4403.75	tf_svr_poly_3
173	173	svr_poly_3	4.12588e+07	6423.3	-0.1073	1.1006	4403.75	tf_svr_poly_3
174	174	svr_poly_3	4.12588e+07	6423.3	-0.1073	1.1006	4403.75	tf_svr_poly_3
175	175	svr_poly_3	4.12588e+07	6423.3	-0.1073	1.1006	4403.75	tf_svr_poly_3
176	176	svr_poly_3	4.12588e+07	6423.3	-0.1073	1.1006	4403.75	tf_svr_poly_3
177	177	svr_poly_3	4.12588e+07	6423.3	-0.1073	1.1006	4403.75	tf_svr_poly_3
178	178	svr_poly_3	4.12588e+07	6423.3	-0.1073	1.1006	4403.75	tf_svr_poly_3
179	179	svr_poly_3	4.12588e+07	6423.3	-0.1073	1.1006	4403.75	tf_svr_poly_3
180	180	svr_poly_3	4.12588e+07	6423.3	-0.1073	1.1006	4403.75	tf_svr_poly_3
181	181	svr_poly_3	4.12588e+07	6423.3	-0.1073	1.1006	4403.75	tf_svr_poly_3
182	182	svr_poly_3	4.12588e+07	6423.3	-0.1073	1.1006	4403.75	tf_svr_poly_3
183	183	svr_poly_3	4.12588e+07	6423.3	-0.1073	1.1006	4403.75	tf_svr_poly_3
184	184	svr_poly_3	4.12588e+07	6423.3	-0.1073	1.1006	4403.75	tf_svr_poly_3
185	185	svr_poly_3	4.12588e+07	6423.3	-0.1073	1.1006	4403.75	tf_svr_poly_3
186	186	svr_poly_3	4.12588e+07	6423.3	-0.1073	1.1006	4403.75	tf_svr_poly_3
187	187	svr_poly_3	4.12588e+07	6423.3	-0.1073	1.1006	4403.75	tf_svr_poly_3
188	188	svr_poly_3	4.12588e+07	6423.3	-0.1073	1.1006	4403.75	tf_svr_poly_3
189	189	svr_poly_3	4.12588e+07	6423.3	-0.1073	1.1006	4403.75	tf_svr_poly_3
190	190	svr_poly_3	4.12588e+07	6423.3	-0.1073	1.1006	4403.75	tf_svr_poly_3
191	191	svr_poly_3	4.12588e+07	6423.3	-0.1073	1.1006	4403.75	tf_svr_poly_3
192	192	svr_poly_3	4.12588e+07	6423.3	-0.1073	1.1006	4403.75	tf_svr_poly_3
193	193	svr_poly_3	4.12588e+07	6423.3	-0.1073	1.1006	4403.75	tf_svr_poly_3
194	194	svr_poly_3	4.12588e+07	6423.3	-0.1073	1.1006	4403.75	tf_svr_poly_3
195	195	svr_poly_3	4.12588e+07	6423.3	-0.1073	1.1006	4403.75	tf_svr_poly_3
196	196	svr_poly_3	4.12588e+07	6423.3	-0.1073	1.1006	4403.75	tf_svr_poly_3
197	197	svr_poly_3	4.12588e+07	6423.3	-0.1073	1.1006	4403.75	tf_svr_poly_3
198	198	svr_poly_3	4.12588e+07	6423.3	-0.1073	1.1006	4403.75	tf_svr_poly_3
199	199	svr_poly_3	4.12588e+07	6423.3	-0.1073	1.1006	4403.75	tf_svr_poly_3
200	200	svr_poly_4	4.11946e+07	6418.3	-0.1056	1.1005	4406.64	tf_svr_poly_4
201	201	svr_poly_4	4.11946e+07	6418.3	-0.1056	1.1005	4406.64	tf_svr_poly_4
202	202	svr_poly_4	4.11946e+07	6418.3	-0.1056	1.1005	4406.64	tf_svr_poly_4
203	203	svr_poly_4	4.11946e+07	6418.3	-0.1056	1.1005	4406.64	tf_svr_poly_4
204	204	svr_poly_4	4.11946e+07	6418.3	-0.1056	1.1005	4406.64	tf_svr_poly_4
205	205	svr_poly_4	4.11946e+07	6418.3	-0.1056	1.1005	4406.64	tf_svr_poly_4
206	206	svr_poly_4	4.11946e+07	6418.3	-0.1056	1.1005	4406.64	tf_svr_poly_4
207	207	svr_poly_4	4.11946e+07	6418.3	-0.1056	1.1005	4406.64	tf_svr_poly_4
208	208	svr_poly_4	4.11946e+07	6418.3	-0.1056	1.1005	4406.64	tf_svr_poly_4
209	209	svr_poly_4	4.11946e+07	6418.3	-0.1056	1.1005	4406.64	tf_svr_poly_4
210	210	svr_poly_4	4.11946e+07	6418.3	-0.1056	1.1005	4406.64	tf_svr_poly_4
211	211	svr_poly_4	4.11946e+07	6418.3	-0.1056	1.1005	4406.64	tf_svr_poly_4
212	212	svr_poly_4	4.11946e+07	6418.3	-0.1056	1.1005	4406.64	tf_svr_poly_4
213	213	svr_poly_4	4.11946e+07	6418.3	-0.1056	1.1005	4406.64	tf_svr_poly_4
214	214	svr_poly_4	4.11946e+07	6418.3	-0.1056	1.1005	4406.64	tf_svr_poly_4
215	215	svr_poly_4	4.11946e+07	6418.3	-0.1056	1.1005	4406.64	tf_svr_poly_4
216	216	svr_poly_4	4.11946e+07	6418.3	-0.1056	1.1005	4406.64	tf_svr_poly_4
217	217	svr_poly_4	4.11946e+07	6418.3	-0.1056	1.1005	4406.64	tf_svr_poly_4
218	218	svr_poly_4	4.11946e+07	6418.3	-0.1056	1.1005	4406.64	tf_svr_poly_4
219	219	svr_poly_4	4.11946e+07	6418.3	-0.1056	1.1005	4406.64	tf_svr_poly_4
220	220	svr_poly_4	4.11946e+07	6418.3	-0.1056	1.1005	4406.64	tf_svr_poly_4
221	221	svr_poly_4	4.11946e+07	6418.3	-0.1056	1.1005	4406.64	tf_svr_poly_4
222	222	svr_poly_4	4.11946e+07	6418.3	-0.1056	1.1005	4406.64	tf_svr_poly_4
223	223	svr_poly_4	4.11946e+07	6418.3	-0.1056	1.1005	4406.64	tf_svr_poly_4
224	224	svr_poly_4	4.11946e+07	6418.3	-0.1056	1.1005	4406.64	tf_svr_poly_4
225	225	svr_poly_4	4.11946e+07	6418.3	-0.1056	1.1005	4406.64	tf_svr_poly_4
226	226	svr_poly_4	4.11946e+07	6418.3	-0.1056	1.1005	4406.64	tf_svr_poly_4
227	227	svr_poly_4	4.11946e+07	6418.3	-0.1056	1.1005	4406.64	tf_svr_poly_4
228	228	svr_poly_4	4.11946e+07	6418.3	-0.1056	1.1005	4406.64	tf_svr_poly_4
229	229	svr_poly_4	4.11946e+07	6418.3	-0.1056	1.1005	4406.64	tf_svr_poly_4
230	230	svr_poly_4	4.11946e+07	6418.3	-0.1056	1.1005	4406.64	tf_svr_poly_4
231	231	svr_poly_4	4.11946e+07	6418.3	-0.1056	1.1005	4406.64	tf_svr_poly_4
232	232	svr_poly_4	4.11946e+07	6418.3	-0.1056	1.1005	4406.64	tf_svr_poly_4
233	233	svr_poly_4	4.11946e+07	6418.3	-0.1056	1.1005	4406.64	tf_svr_poly_4
234	234	svr_poly_4	4.11946e+07	6418.3	-0.1056	1.1005	4406.64	tf_svr_poly_4
235	235	svr_poly_4	4.11946e+07	6418.3	-0.1056	1.1005	4406.64	tf_svr_poly_4
236	236	svr_poly_4	4.11946e+07	6418.3	-0.1056	1.1005	4406.64	tf_svr_poly_4
237	237	svr_poly_4	4.11946e+07	6418.3	-0.1056	1.1005	4406.64	tf_svr_poly_4
238	238	svr_poly_4	4.11946e+07	6418.3	-0.1056	1.1005	4406.64	tf_svr_poly_4
239	239	svr_poly_4	4.11946e+07	6418.3	-0.1056	1.1005	4406.64	tf_svr_poly_4
240	240	svr_poly_4	4.11946e+07	6418.3	-0.1056	1.1005	4406.64	tf_svr_poly_4
241	241	svr_poly_4	4.11946e+07	6418.3	-0.1056	1.1005	4406.64	tf_svr_poly_4
242	242	svr_poly_4	4.11946e+07	6418.3	-0.1056	1.1005	4406.64	tf_svr_poly_4
243	243	svr_poly_4	4.11946e+07	6418.3	-0.1056	1.1005	4406.64	tf_svr_poly_4
244	244	svr_poly_4	4.11946e+07	6418.3	-0.1056	1.1005	4406.64	tf_svr_poly_4
245	245	svr_poly_4	4.11946e+07	6418.3	-0.1056	1.1005	4406.64	tf_svr_poly_4
246	246	svr_poly_4	4.11946e+07	6418.3	-0.1056	1.1005	4406.64	tf_svr_poly_4
247	247	svr_poly_4	4.11946e+07	6418.3	-0.1056	1.1005	4406.64	tf_svr_poly_4
248	248	svr_poly_4	4.11946e+07	6418.3	-0.1056	1.1005	4406.64	tf_svr_poly_4
249	249	svr_poly_4	4.11946e+07	6418.3	-0.1056	1.1005	4406.64	tf_svr_poly_4
250	250	svr_poly_10	8.06753e+07	8981.95	-1.1652	1.1968	5188.63	tf_svr_poly_10
251	251	svr_poly_10	8.06753e+07	8981.95	-1.1652	1.1968	5188.63	tf_svr_poly_10
252	252	svr_poly_10	8.06753e+07	8981.95	-1.1652	1.1968	5188.63	tf_svr_poly_10
253	253	svr_poly_10	8.06753e+07	8981.95	-1.1652	1.1968	5188.63	tf_svr_poly_10
254	254	svr_poly_10	8.06753e+07	8981.95	-1.1652	1.1968	5188.63	tf_svr_poly_10
255	255	svr_poly_10	8.06753e+07	8981.95	-1.1652	1.1968	5188.63	tf_svr_poly_10
256	256	svr_poly_10	8.06753e+07	8981.95	-1.1652	1.1968	5188.63	tf_svr_poly_10
257	257	svr_poly_10	8.06753e+07	8981.95	-1.1652	1.1968	5188.63	tf_svr_poly_10
258	258	svr_poly_10	8.06753e+07	8981.95	-1.1652	1.1968	5188.63	tf_svr_poly_10
259	259	svr_poly_10	8.06753e+07	8981.95	-1.1652	1.1968	5188.63	tf_svr_poly_10
260	260	svr_poly_10	8.06753e+07	8981.95	-1.1652	1.1968	5188.63	tf_svr_poly_10
261	261	svr_poly_10	8.06753e+07	8981.95	-1.1652	1.1968	5188.63	tf_svr_poly_10
262	262	svr_poly_10	8.06753e+07	8981.95	-1.1652	1.1968	5188.63	tf_svr_poly_10
263	263	svr_poly_10	8.06753e+07	8981.95	-1.1652	1.1968	5188.63	tf_svr_poly_10
264	264	svr_poly_10	8.06753e+07	8981.95	-1.1652	1.1968	5188.63	tf_svr_poly_10
265	265	svr_poly_10	8.06753e+07	8981.95	-1.1652	1.1968	5188.63	tf_svr_poly_10
266	266	svr_poly_10	8.06753e+07	8981.95	-1.1652	1.1968	5188.63	tf_svr_poly_10
267	267	svr_poly_10	8.06753e+07	8981.95	-1.1652	1.1968	5188.63	tf_svr_poly_10
268	268	svr_poly_10	8.06753e+07	8981.95	-1.1652	1.1968	5188.63	tf_svr_poly_10
269	269	svr_poly_10	8.06753e+07	8981.95	-1.1652	1.1968	5188.63	tf_svr_poly_10
270	270	svr_poly_10	8.06753e+07	8981.95	-1.1652	1.1968	5188.63	tf_svr_poly_10
271	271	svr_poly_10	8.06753e+07	8981.95	-1.1652	1.1968	5188.63	tf_svr_poly_10
272	272	svr_poly_10	8.06753e+07	8981.95	-1.1652	1.1968	5188.63	tf_svr_poly_10
273	273	svr_poly_10	8.06753e+07	8981.95	-1.1652	1.1968	5188.63	tf_svr_poly_10
274	274	svr_poly_10	8.06753e+07	8981.95	-1.1652	1.1968	5188.63	tf_svr_poly_10
275	275	svr_poly_10	8.06753e+07	8981.95	-1.1652	1.1968	5188.63	tf_svr_poly_10
276	276	svr_poly_10	8.06753e+07	8981.95	-1.1652	1.1968	5188.63	tf_svr_poly_10
277	277	svr_poly_10	8.06753e+07	8981.95	-1.1652	1.1968	5188.63	tf_svr_poly_10
278	278	svr_poly_10	8.06753e+07	8981.95	-1.1652	1.1968	5188.63	tf_svr_poly_10
279	279	svr_poly_10	8.06753e+07	8981.95	-1.1652	1.1968	5188.63	tf_svr_poly_10
280	280	svr_poly_10	8.06753e+07	8981.95	-1.1652	1.1968	5188.63	tf_svr_poly_10
281	281	svr_poly_10	8.06753e+07	8981.95	-1.1652	1.1968	5188.63	tf_svr_poly_10
282	282	svr_poly_10	8.06753e+07	8981.95	-1.1652	1.1968	5188.63	tf_svr_poly_10
283	283	svr_poly_10	8.06753e+07	8981.95	-1.1652	1.1968	5188.63	tf_svr_poly_10
284	284	svr_poly_10	8.06753e+07	8981.95	-1.1652	1.1968	5188.63	tf_svr_poly_10
285	285	svr_poly_10	8.06753e+07	8981.95	-1.1652	1.1968	5188.63	tf_svr_poly_10
286	286	svr_poly_10	8.06753e+07	8981.95	-1.1652	1.1968	5188.63	tf_svr_poly_10
287	287	svr_poly_10	8.06753e+07	8981.95	-1.1652	1.1968	5188.63	tf_svr_poly_10
288	288	svr_poly_10	8.06753e+07	8981.95	-1.1652	1.1968	5188.63	tf_svr_poly_10
289	289	svr_poly_10	8.06753e+07	8981.95	-1.1652	1.1968	5188.63	tf_svr_poly_10
290	290	svr_poly_10	8.06753e+07	8981.95	-1.1652	1.1968	5188.63	tf_svr_poly_10
291	291	svr_poly_10	8.06753e+07	8981.95	-1.1652	1.1968	5188.63	tf_svr_poly_10
292	292	svr_poly_10	8.06753e+07	8981.95	-1.1652	1.1968	5188.63	tf_svr_poly_10
293	293	svr_poly_10	8.06753e+07	8981.95	-1.1652	1.1968	5188.63	tf_svr_poly_10
294	294	svr_poly_10	8.06753e+07	8981.95	-1.1652	1.1968	5188.63	tf_svr_poly_10
295	295	svr_poly_10	8.06753e+07	8981.95	-1.1652	1.1968	5188.63	tf_svr_poly_10
296	296	svr_poly_10	8.06753e+07	8981.95	-1.1652	1.1968	5188.63	tf_svr_poly_10
297	297	svr_poly_10	8.06753e+07	8981.95	-1.1652	1.1968	5188.63	tf_svr_poly_10
298	298	svr_poly_10	8.06753e+07	8981.95	-1.1652	1.1968	5188.63	tf_svr_poly_10
299	299	svr_poly_10	8.06753e+07	8981.95	-1.1652	1.1968	5188.63	tf_svr_poly_10
300	300	svr_poly_15	2.62212e+09	51206.7	-69.3733	7.3954	11850.9	tf_svr_poly_15
301	301	svr_poly_15	2.62212e+09	51206.7	-69.3733	7.3954	11850.9	tf_svr_poly_15
302	302	svr_poly_15	2.62212e+09	51206.7	-69.3733	7.3954	11850.9	tf_svr_poly_15
303	303	svr_poly_15	2.62212e+09	51206.7	-69.3733	7.3954	11850.9	tf_svr_poly_15
304	304	svr_poly_15	2.62212e+09	51206.7	-69.3733	7.3954	11850.9	tf_svr_poly_15
305	305	svr_poly_15	2.62212e+09	51206.7	-69.3733	7.3954	11850.9	tf_svr_poly_15
306	306	svr_poly_15	2.62212e+09	51206.7	-69.3733	7.3954	11850.9	tf_svr_poly_15
307	307	svr_poly_15	2.62212e+09	51206.7	-69.3733	7.3954	11850.9	tf_svr_poly_15
308	308	svr_poly_15	2.62212e+09	51206.7	-69.3733	7.3954	11850.9	tf_svr_poly_15
309	309	svr_poly_15	2.62212e+09	51206.7	-69.3733	7.3954	11850.9	tf_svr_poly_15
310	310	svr_poly_15	2.62212e+09	51206.7	-69.3733	7.3954	11850.9	tf_svr_poly_15
311	311	svr_poly_15	2.62212e+09	51206.7	-69.3733	7.3954	11850.9	tf_svr_poly_15
312	312	svr_poly_15	2.62212e+09	51206.7	-69.3733	7.3954	11850.9	tf_svr_poly_15
313	313	svr_poly_15	2.62212e+09	51206.7	-69.3733	7.3954	11850.9	tf_svr_poly_15
314	314	svr_poly_15	2.62212e+09	51206.7	-69.3733	7.3954	11850.9	tf_svr_poly_15
315	315	svr_poly_15	2.62212e+09	51206.7	-69.3733	7.3954	11850.9	tf_svr_poly_15
316	316	svr_poly_15	2.62212e+09	51206.7	-69.3733	7.3954	11850.9	tf_svr_poly_15
317	317	svr_poly_15	2.62212e+09	51206.7	-69.3733	7.3954	11850.9	tf_svr_poly_15
318	318	svr_poly_15	2.62212e+09	51206.7	-69.3733	7.3954	11850.9	tf_svr_poly_15
319	319	svr_poly_15	2.62212e+09	51206.7	-69.3733	7.3954	11850.9	tf_svr_poly_15
320	320	svr_poly_15	2.62212e+09	51206.7	-69.3733	7.3954	11850.9	tf_svr_poly_15
321	321	svr_poly_15	2.62212e+09	51206.7	-69.3733	7.3954	11850.9	tf_svr_poly_15
322	322	svr_poly_15	2.62212e+09	51206.7	-69.3733	7.3954	11850.9	tf_svr_poly_15
323	323	svr_poly_15	2.62212e+09	51206.7	-69.3733	7.3954	11850.9	tf_svr_poly_15
324	324	svr_poly_15	2.62212e+09	51206.7	-69.3733	7.3954	11850.9	tf_svr_poly_15
325	325	svr_poly_15	2.62212e+09	51206.7	-69.3733	7.3954	11850.9	tf_svr_poly_15
326	326	svr_poly_15	2.62212e+09	51206.7	-69.3733	7.3954	11850.9	tf_svr_poly_15
327	327	svr_poly_15	2.62212e+09	51206.7	-69.3733	7.3954	11850.9	tf_svr_poly_15
328	328	svr_poly_15	2.62212e+09	51206.7	-69.3733	7.3954	11850.9	tf_svr_poly_15
329	329	svr_poly_15	2.62212e+09	51206.7	-69.3733	7.3954	11850.9	tf_svr_poly_15
330	330	svr_poly_15	2.62212e+09	51206.7	-69.3733	7.3954	11850.9	tf_svr_poly_15
331	331	svr_poly_15	2.62212e+09	51206.7	-69.3733	7.3954	11850.9	tf_svr_poly_15
332	332	svr_poly_15	2.62212e+09	51206.7	-69.3733	7.3954	11850.9	tf_svr_poly_15
333	333	svr_poly_15	2.62212e+09	51206.7	-69.3733	7.3954	11850.9	tf_svr_poly_15
334	334	svr_poly_15	2.62212e+09	51206.7	-69.3733	7.3954	11850.9	tf_svr_poly_15
335	335	svr_poly_15	2.62212e+09	51206.7	-69.3733	7.3954	11850.9	tf_svr_poly_15
336	336	svr_poly_15	2.62212e+09	51206.7	-69.3733	7.3954	11850.9	tf_svr_poly_15
337	337	svr_poly_15	2.62212e+09	51206.7	-69.3733	7.3954	11850.9	tf_svr_poly_15
338	338	svr_poly_15	2.62212e+09	51206.7	-69.3733	7.3954	11850.9	tf_svr_poly_15
339	339	svr_poly_15	2.62212e+09	51206.7	-69.3733	7.3954	11850.9	tf_svr_poly_15
340	340	svr_poly_15	2.62212e+09	51206.7	-69.3733	7.3954	11850.9	tf_svr_poly_15
341	341	svr_poly_15	2.62212e+09	51206.7	-69.3733	7.3954	11850.9	tf_svr_poly_15
342	342	svr_poly_15	2.62212e+09	51206.7	-69.3733	7.3954	11850.9	tf_svr_poly_15
343	343	svr_poly_15	2.62212e+09	51206.7	-69.3733	7.3954	11850.9	tf_svr_poly_15
344	344	svr_poly_15	2.62212e+09	51206.7	-69.3733	7.3954	11850.9	tf_svr_poly_15
345	345	svr_poly_15	2.62212e+09	51206.7	-69.3733	7.3954	11850.9	tf_svr_poly_15
346	346	svr_poly_15	2.62212e+09	51206.7	-69.3733	7.3954	11850.9	tf_svr_poly_15
347	347	svr_poly_15	2.62212e+09	51206.7	-69.3733	7.3954	11850.9	tf_svr_poly_15
348	348	svr_poly_15	2.62212e+09	51206.7	-69.3733	7.3954	11850.9	tf_svr_poly_15
349	349	svr_poly_15	2.62212e+09	51206.7	-69.3733	7.3954	11850.9	tf_svr_poly_15
350	350	svr_rbf	4.13497e+07	6430.37	-0.1098	1.1009	4404.07	tf_svr_rbf
351	351	svr_rbf	4.13497e+07	6430.37	-0.1098	1.1009	4404.07	tf_svr_rbf
352	352	svr_rbf	4.13497e+07	6430.37	-0.1098	1.1009	4404.07	tf_svr_rbf
353	353	svr_rbf	4.13497e+07	6430.37	-0.1098	1.1009	4404.07	tf_svr_rbf
354	354	svr_rbf	4.13497e+07	6430.37	-0.1098	1.1009	4404.07	tf_svr_rbf
355	355	svr_rbf	4.13497e+07	6430.37	-0.1098	1.1009	4404.07	tf_svr_rbf
356	356	svr_rbf	4.13497e+07	6430.37	-0.1098	1.1009	4404.07	tf_svr_rbf
357	357	svr_rbf	4.13497e+07	6430.37	-0.1098	1.1009	4404.07	tf_svr_rbf
358	358	svr_rbf	4.13497e+07	6430.37	-0.1098	1.1009	4404.07	tf_svr_rbf
359	359	svr_rbf	4.13497e+07	6430.37	-0.1098	1.1009	4404.07	tf_svr_rbf
360	360	svr_rbf	4.13497e+07	6430.37	-0.1098	1.1009	4404.07	tf_svr_rbf
361	361	svr_rbf	4.13497e+07	6430.37	-0.1098	1.1009	4404.07	tf_svr_rbf
362	362	svr_rbf	4.13497e+07	6430.37	-0.1098	1.1009	4404.07	tf_svr_rbf
363	363	svr_rbf	4.13497e+07	6430.37	-0.1098	1.1009	4404.07	tf_svr_rbf
364	364	svr_rbf	4.13497e+07	6430.37	-0.1098	1.1009	4404.07	tf_svr_rbf
365	365	svr_rbf	4.13497e+07	6430.37	-0.1098	1.1009	4404.07	tf_svr_rbf
366	366	svr_rbf	4.13497e+07	6430.37	-0.1098	1.1009	4404.07	tf_svr_rbf
367	367	svr_rbf	4.13497e+07	6430.37	-0.1098	1.1009	4404.07	tf_svr_rbf
368	368	svr_rbf	4.13497e+07	6430.37	-0.1098	1.1009	4404.07	tf_svr_rbf
369	369	svr_rbf	4.13497e+07	6430.37	-0.1098	1.1009	4404.07	tf_svr_rbf
370	370	svr_rbf	4.13497e+07	6430.37	-0.1098	1.1009	4404.07	tf_svr_rbf
371	371	svr_rbf	4.13497e+07	6430.37	-0.1098	1.1009	4404.07	tf_svr_rbf
372	372	svr_rbf	4.13497e+07	6430.37	-0.1098	1.1009	4404.07	tf_svr_rbf
373	373	svr_rbf	4.13497e+07	6430.37	-0.1098	1.1009	4404.07	tf_svr_rbf
374	374	svr_rbf	4.13497e+07	6430.37	-0.1098	1.1009	4404.07	tf_svr_rbf
375	375	svr_rbf	4.13497e+07	6430.37	-0.1098	1.1009	4404.07	tf_svr_rbf
376	376	svr_rbf	4.13497e+07	6430.37	-0.1098	1.1009	4404.07	tf_svr_rbf
377	377	svr_rbf	4.13497e+07	6430.37	-0.1098	1.1009	4404.07	tf_svr_rbf
378	378	svr_rbf	4.13497e+07	6430.37	-0.1098	1.1009	4404.07	tf_svr_rbf
379	379	svr_rbf	4.13497e+07	6430.37	-0.1098	1.1009	4404.07	tf_svr_rbf
380	380	svr_rbf	4.13497e+07	6430.37	-0.1098	1.1009	4404.07	tf_svr_rbf
381	381	svr_rbf	4.13497e+07	6430.37	-0.1098	1.1009	4404.07	tf_svr_rbf
382	382	svr_rbf	4.13497e+07	6430.37	-0.1098	1.1009	4404.07	tf_svr_rbf
383	383	svr_rbf	4.13497e+07	6430.37	-0.1098	1.1009	4404.07	tf_svr_rbf
384	384	svr_rbf	4.13497e+07	6430.37	-0.1098	1.1009	4404.07	tf_svr_rbf
385	385	svr_rbf	4.13497e+07	6430.37	-0.1098	1.1009	4404.07	tf_svr_rbf
386	386	svr_rbf	4.13497e+07	6430.37	-0.1098	1.1009	4404.07	tf_svr_rbf
387	387	svr_rbf	4.13497e+07	6430.37	-0.1098	1.1009	4404.07	tf_svr_rbf
388	388	svr_rbf	4.13497e+07	6430.37	-0.1098	1.1009	4404.07	tf_svr_rbf
389	389	svr_rbf	4.13497e+07	6430.37	-0.1098	1.1009	4404.07	tf_svr_rbf
390	390	svr_rbf	4.13497e+07	6430.37	-0.1098	1.1009	4404.07	tf_svr_rbf
391	391	svr_rbf	4.13497e+07	6430.37	-0.1098	1.1009	4404.07	tf_svr_rbf
392	392	svr_rbf	4.13497e+07	6430.37	-0.1098	1.1009	4404.07	tf_svr_rbf
393	393	svr_rbf	4.13497e+07	6430.37	-0.1098	1.1009	4404.07	tf_svr_rbf
394	394	svr_rbf	4.13497e+07	6430.37	-0.1098	1.1009	4404.07	tf_svr_rbf
395	395	svr_rbf	4.13497e+07	6430.37	-0.1098	1.1009	4404.07	tf_svr_rbf
396	396	svr_rbf	4.13497e+07	6430.37	-0.1098	1.1009	4404.07	tf_svr_rbf
397	397	svr_rbf	4.13497e+07	6430.37	-0.1098	1.1009	4404.07	tf_svr_rbf
398	398	svr_rbf	4.13497e+07	6430.37	-0.1098	1.1009	4404.07	tf_svr_rbf
399	399	svr_rbf	4.13497e+07	6430.37	-0.1098	1.1009	4404.07	tf_svr_rbf
400	400	svr_sigmoid	4.13507e+07	6430.45	-0.1098	1.1009	4404.19	tf_svr_sigmoid
401	401	svr_sigmoid	4.13507e+07	6430.45	-0.1098	1.1009	4404.19	tf_svr_sigmoid
402	402	svr_sigmoid	4.13507e+07	6430.45	-0.1098	1.1009	4404.19	tf_svr_sigmoid
403	403	svr_sigmoid	4.13507e+07	6430.45	-0.1098	1.1009	4404.19	tf_svr_sigmoid
404	404	svr_sigmoid	4.13507e+07	6430.45	-0.1098	1.1009	4404.19	tf_svr_sigmoid
405	405	svr_sigmoid	4.13507e+07	6430.45	-0.1098	1.1009	4404.19	tf_svr_sigmoid
406	406	svr_sigmoid	4.13507e+07	6430.45	-0.1098	1.1009	4404.19	tf_svr_sigmoid
407	407	svr_sigmoid	4.13507e+07	6430.45	-0.1098	1.1009	4404.19	tf_svr_sigmoid
408	408	svr_sigmoid	4.13507e+07	6430.45	-0.1098	1.1009	4404.19	tf_svr_sigmoid
409	409	svr_sigmoid	4.13507e+07	6430.45	-0.1098	1.1009	4404.19	tf_svr_sigmoid
410	410	svr_sigmoid	4.13507e+07	6430.45	-0.1098	1.1009	4404.19	tf_svr_sigmoid
411	411	svr_sigmoid	4.13507e+07	6430.45	-0.1098	1.1009	4404.19	tf_svr_sigmoid
412	412	svr_sigmoid	4.13507e+07	6430.45	-0.1098	1.1009	4404.19	tf_svr_sigmoid
413	413	svr_sigmoid	4.13507e+07	6430.45	-0.1098	1.1009	4404.19	tf_svr_sigmoid
414	414	svr_sigmoid	4.13507e+07	6430.45	-0.1098	1.1009	4404.19	tf_svr_sigmoid
415	415	svr_sigmoid	4.13507e+07	6430.45	-0.1098	1.1009	4404.19	tf_svr_sigmoid
416	416	svr_sigmoid	4.13507e+07	6430.45	-0.1098	1.1009	4404.19	tf_svr_sigmoid
417	417	svr_sigmoid	4.13507e+07	6430.45	-0.1098	1.1009	4404.19	tf_svr_sigmoid
418	418	svr_sigmoid	4.13507e+07	6430.45	-0.1098	1.1009	4404.19	tf_svr_sigmoid
419	419	svr_sigmoid	4.13507e+07	6430.45	-0.1098	1.1009	4404.19	tf_svr_sigmoid
420	420	svr_sigmoid	4.13507e+07	6430.45	-0.1098	1.1009	4404.19	tf_svr_sigmoid
421	421	svr_sigmoid	4.13507e+07	6430.45	-0.1098	1.1009	4404.19	tf_svr_sigmoid
422	422	svr_sigmoid	4.13507e+07	6430.45	-0.1098	1.1009	4404.19	tf_svr_sigmoid
423	423	svr_sigmoid	4.13507e+07	6430.45	-0.1098	1.1009	4404.19	tf_svr_sigmoid
424	424	svr_sigmoid	4.13507e+07	6430.45	-0.1098	1.1009	4404.19	tf_svr_sigmoid
425	425	svr_sigmoid	4.13507e+07	6430.45	-0.1098	1.1009	4404.19	tf_svr_sigmoid
426	426	svr_sigmoid	4.13507e+07	6430.45	-0.1098	1.1009	4404.19	tf_svr_sigmoid
427	427	svr_sigmoid	4.13507e+07	6430.45	-0.1098	1.1009	4404.19	tf_svr_sigmoid
428	428	svr_sigmoid	4.13507e+07	6430.45	-0.1098	1.1009	4404.19	tf_svr_sigmoid
429	429	svr_sigmoid	4.13507e+07	6430.45	-0.1098	1.1009	4404.19	tf_svr_sigmoid
430	430	svr_sigmoid	4.13507e+07	6430.45	-0.1098	1.1009	4404.19	tf_svr_sigmoid
431	431	svr_sigmoid	4.13507e+07	6430.45	-0.1098	1.1009	4404.19	tf_svr_sigmoid
432	432	svr_sigmoid	4.13507e+07	6430.45	-0.1098	1.1009	4404.19	tf_svr_sigmoid
433	433	svr_sigmoid	4.13507e+07	6430.45	-0.1098	1.1009	4404.19	tf_svr_sigmoid
434	434	svr_sigmoid	4.13507e+07	6430.45	-0.1098	1.1009	4404.19	tf_svr_sigmoid
435	435	svr_sigmoid	4.13507e+07	6430.45	-0.1098	1.1009	4404.19	tf_svr_sigmoid
436	436	svr_sigmoid	4.13507e+07	6430.45	-0.1098	1.1009	4404.19	tf_svr_sigmoid
437	437	svr_sigmoid	4.13507e+07	6430.45	-0.1098	1.1009	4404.19	tf_svr_sigmoid
438	438	svr_sigmoid	4.13507e+07	6430.45	-0.1098	1.1009	4404.19	tf_svr_sigmoid
439	439	svr_sigmoid	4.13507e+07	6430.45	-0.1098	1.1009	4404.19	tf_svr_sigmoid
440	440	svr_sigmoid	4.13507e+07	6430.45	-0.1098	1.1009	4404.19	tf_svr_sigmoid
441	441	svr_sigmoid	4.13507e+07	6430.45	-0.1098	1.1009	4404.19	tf_svr_sigmoid
442	442	svr_sigmoid	4.13507e+07	6430.45	-0.1098	1.1009	4404.19	tf_svr_sigmoid
443	443	svr_sigmoid	4.13507e+07	6430.45	-0.1098	1.1009	4404.19	tf_svr_sigmoid
444	444	svr_sigmoid	4.13507e+07	6430.45	-0.1098	1.1009	4404.19	tf_svr_sigmoid
445	445	svr_sigmoid	4.13507e+07	6430.45	-0.1098	1.1009	4404.19	tf_svr_sigmoid
446	446	svr_sigmoid	4.13507e+07	6430.45	-0.1098	1.1009	4404.19	tf_svr_sigmoid
447	447	svr_sigmoid	4.13507e+07	6430.45	-0.1098	1.1009	4404.19	tf_svr_sigmoid
448	448	svr_sigmoid	4.13507e+07	6430.45	-0.1098	1.1009	4404.19	tf_svr_sigmoid
449	449	svr_sigmoid	4.13507e+07	6430.45	-0.1098	1.1009	4404.19	tf_svr_sigmoid
450	450	random_forest_10	2.77953e+07	5272.13	0.254	1.0678	3653.7	tf_random_forest_10
451	451	random_forest_10	2.45711e+07	4956.93	0.3406	1.0599	3355.67	tf_random_forest_10
452	452	random_forest_10	2.51067e+07	5010.66	0.3262	1.0612	3404.97	tf_random_forest_10
453	453	random_forest_10	2.4947e+07	4994.69	0.3305	1.0608	3382.35	tf_random_forest_10
454	454	random_forest_10	2.57901e+07	5078.39	0.3078	1.0629	3405.68	tf_random_forest_10
455	455	random_forest_10	2.61633e+07	5115.01	0.2978	1.0638	3608.92	tf_random_forest_10
456	456	random_forest_10	2.35671e+07	4854.59	0.3675	1.0575	3325.55	tf_random_forest_10
457	457	random_forest_10	2.38379e+07	4882.4	0.3602	1.0581	3463.52	tf_random_forest_10
458	458	random_forest_10	2.57e+07	5069.52	0.3103	1.0627	3405.66	tf_random_forest_10
459	459	random_forest_10	2.5494e+07	5049.15	0.3158	1.0622	3476.95	tf_random_forest_10
460	460	random_forest_10	24793630	4979.32	0.3346	1.0605	3442.28	tf_random_forest_10
461	461	random_forest_10	2.3931e+07	4891.93	0.3577	1.0584	3225.24	tf_random_forest_10
462	462	random_forest_10	2.61509e+07	5113.8	0.2982	1.0638	3444.63	tf_random_forest_10
463	463	random_forest_10	2.63646e+07	5134.65	0.2924	1.0643	3460.42	tf_random_forest_10
464	464	random_forest_10	2.67832e+07	5175.25	0.2812	1.0653	3388.09	tf_random_forest_10
465	465	random_forest_10	2.52221e+07	5022.17	0.3231	1.0615	3615.7	tf_random_forest_10
466	466	random_forest_10	2.59629e+07	5095.38	0.3032	1.0633	3491.72	tf_random_forest_10
467	467	random_forest_10	2.40529e+07	4904.37	0.3545	1.0587	3319.98	tf_random_forest_10
468	468	random_forest_10	2.33923e+07	4836.55	0.3722	1.0571	3246.01	tf_random_forest_10
469	469	random_forest_10	2.67207e+07	5169.21	0.2829	1.0652	3489.06	tf_random_forest_10
470	470	random_forest_10	2.56578e+07	5065.35	0.3114	1.0626	3478.23	tf_random_forest_10
471	471	random_forest_10	2.5685e+07	5068.04	0.3107	1.0626	3535.08	tf_random_forest_10
472	472	random_forest_10	2.19329e+07	4683.26	0.4114	1.0535	3210.55	tf_random_forest_10
473	473	random_forest_10	2.26312e+07	4757.23	0.3926	1.0552	3319.68	tf_random_forest_10
474	474	random_forest_10	2.58875e+07	5087.97	0.3052	1.0631	3517.97	tf_random_forest_10
475	475	random_forest_10	2.29548e+07	4791.12	0.3839	1.056	3303.18	tf_random_forest_10
476	476	random_forest_10	2.63796e+07	5136.11	0.292	1.0643	3592.25	tf_random_forest_10
477	477	random_forest_10	2.6283e+07	5126.69	0.2946	1.0641	3584.22	tf_random_forest_10
478	478	random_forest_10	2.32587e+07	4822.73	0.3758	1.0567	3234.44	tf_random_forest_10
479	479	random_forest_10	2.71147e+07	5207.17	0.2723	1.0661	3595.26	tf_random_forest_10
480	480	random_forest_10	2.62863e+07	5127.02	0.2945	1.0641	3520.08	tf_random_forest_10
481	481	random_forest_10	2.57933e+07	5078.71	0.3078	1.0629	3517.11	tf_random_forest_10
482	482	random_forest_10	2.72793e+07	5222.96	0.2679	1.0665	3536.38	tf_random_forest_10
483	483	random_forest_10	2.52215e+07	5022.1	0.3231	1.0615	3474.79	tf_random_forest_10
484	484	random_forest_10	2.48247e+07	4982.44	0.3337	1.0605	3479.67	tf_random_forest_10
485	485	random_forest_10	2.67958e+07	5176.46	0.2808	1.0654	3520.41	tf_random_forest_10
486	486	random_forest_10	2.37405e+07	4872.43	0.3628	1.0579	3451.88	tf_random_forest_10
487	487	random_forest_10	2.64904e+07	5146.89	0.289	1.0646	3396.37	tf_random_forest_10
488	488	random_forest_10	2.59561e+07	5094.72	0.3034	1.0633	3588.32	tf_random_forest_10
489	489	random_forest_10	2.61126e+07	5110.05	0.2992	1.0637	3436.96	tf_random_forest_10
490	490	random_forest_10	2.54825e+07	5048.02	0.3161	1.0622	3387.83	tf_random_forest_10
491	491	random_forest_10	2.29357e+07	4789.12	0.3844	1.0559	3337.48	tf_random_forest_10
492	492	random_forest_10	2.9443e+07	5426.14	0.2098	1.0718	3678.57	tf_random_forest_10
493	493	random_forest_10	2.60148e+07	5100.47	0.3018	1.0634	3592.01	tf_random_forest_10
494	494	random_forest_10	2.47498e+07	4974.91	0.3358	1.0604	3309.81	tf_random_forest_10
495	495	random_forest_10	2.74712e+07	5241.3	0.2627	1.067	3696.93	tf_random_forest_10
496	496	random_forest_10	2.52612e+07	5026.05	0.322	1.0616	3367.45	tf_random_forest_10
497	497	random_forest_10	2.38609e+07	4884.76	0.3596	1.0582	3295.46	tf_random_forest_10
498	498	random_forest_10	2.84103e+07	5330.13	0.2375	1.0693	3626.98	tf_random_forest_10
499	499	random_forest_10	2.61927e+07	5117.88	0.297	1.0639	3623.38	tf_random_forest_10
500	500	random_forest_50	2.35609e+07	4853.96	0.3677	1.0575	3328.51	tf_random_forest_50
501	501	random_forest_50	2.38894e+07	4887.68	0.3589	1.0583	3344.49	tf_random_forest_50
502	502	random_forest_50	2.21437e+07	4705.71	0.4057	1.054	3212.44	tf_random_forest_50
503	503	random_forest_50	2.4908e+07	4990.79	0.3315	1.0608	3441.58	tf_random_forest_50
504	504	random_forest_50	2.2704e+07	4764.88	0.3907	1.0554	3290.42	tf_random_forest_50
505	505	random_forest_50	2.37229e+07	4870.62	0.3633	1.0579	3340.88	tf_random_forest_50
506	506	random_forest_50	2.49685e+07	4996.85	0.3299	1.0609	3422.37	tf_random_forest_50
507	507	random_forest_50	2.2924e+07	4787.9	0.3848	1.0559	3285.01	tf_random_forest_50
508	508	random_forest_50	2.39182e+07	4890.62	0.3581	1.0583	3339.87	tf_random_forest_50
509	509	random_forest_50	2.33978e+07	4837.13	0.372	1.0571	3278.13	tf_random_forest_50
510	510	random_forest_50	2.26015e+07	4754.1	0.3934	1.0551	3284.64	tf_random_forest_50
511	511	random_forest_50	2.31072e+07	4806.99	0.3798	1.0564	3334.07	tf_random_forest_50
512	512	random_forest_50	2.49254e+07	4992.54	0.331	1.0608	3450.28	tf_random_forest_50
513	513	random_forest_50	2.28597e+07	4781.18	0.3865	1.0558	3285.77	tf_random_forest_50
514	514	random_forest_50	2.40798e+07	4907.12	0.3537	1.0587	3370.38	tf_random_forest_50
515	515	random_forest_50	2.3474e+07	4845	0.37	1.0573	3368.6	tf_random_forest_50
516	516	random_forest_50	2.40794e+07	4907.07	0.3538	1.0587	3409.05	tf_random_forest_50
517	517	random_forest_50	2.36835e+07	4866.57	0.3644	1.0578	3343.45	tf_random_forest_50
518	518	random_forest_50	2.41518e+07	4914.45	0.3518	1.0589	3402.3	tf_random_forest_50
519	519	random_forest_50	2.42813e+07	4927.61	0.3483	1.0592	3373.94	tf_random_forest_50
520	520	random_forest_50	2.44016e+07	4939.79	0.3451	1.0595	3377.85	tf_random_forest_50
521	521	random_forest_50	2.44456e+07	4944.25	0.3439	1.0596	3358.02	tf_random_forest_50
522	522	random_forest_50	2.34422e+07	4841.72	0.3709	1.0572	3293.79	tf_random_forest_50
523	523	random_forest_50	2.28197e+07	4776.99	0.3876	1.0557	3270.27	tf_random_forest_50
524	524	random_forest_50	2.27502e+07	4769.72	0.3894	1.0555	3308.52	tf_random_forest_50
525	525	random_forest_50	2.26585e+07	4760.1	0.3919	1.0553	3312.63	tf_random_forest_50
526	526	random_forest_50	23753113	4873.72	0.3625	1.0579	3314.48	tf_random_forest_50
527	527	random_forest_50	23578631	4855.78	0.3672	1.0575	3333.14	tf_random_forest_50
528	528	random_forest_50	2.40092e+07	4899.92	0.3556	1.0586	3400.28	tf_random_forest_50
529	529	random_forest_50	2.25782e+07	4751.65	0.394	1.0551	3271.8	tf_random_forest_50
530	530	random_forest_50	2.36814e+07	4866.36	0.3644	1.0578	3309.99	tf_random_forest_50
531	531	random_forest_50	2.18592e+07	4675.39	0.4133	1.0533	3276.19	tf_random_forest_50
532	532	random_forest_50	2.36067e+07	4858.67	0.3664	1.0576	3322.27	tf_random_forest_50
533	533	random_forest_50	2.33634e+07	4833.57	0.373	1.057	3373.14	tf_random_forest_50
534	534	random_forest_50	2.38717e+07	4885.87	0.3593	1.0582	3370.01	tf_random_forest_50
535	535	random_forest_50	2.36436e+07	4862.47	0.3654	1.0577	3274.2	tf_random_forest_50
536	536	random_forest_50	2.23923e+07	4732.05	0.399	1.0546	3248.9	tf_random_forest_50
537	537	random_forest_50	2.33544e+07	4832.64	0.3732	1.057	3355.32	tf_random_forest_50
538	538	random_forest_50	2.40595e+07	4905.05	0.3543	1.0587	3416.99	tf_random_forest_50
539	539	random_forest_50	2.28303e+07	4778.11	0.3873	1.0557	3270.48	tf_random_forest_50
540	540	random_forest_50	2.36816e+07	4866.38	0.3644	1.0578	3423.36	tf_random_forest_50
541	541	random_forest_50	2.35107e+07	4848.79	0.369	1.0573	3360.08	tf_random_forest_50
542	542	random_forest_50	2.23921e+07	4732.02	0.399	1.0546	3206.41	tf_random_forest_50
543	543	random_forest_50	2.25859e+07	4752.46	0.3938	1.0551	3274.71	tf_random_forest_50
544	544	random_forest_50	2.41131e+07	4910.51	0.3528	1.0588	3351.41	tf_random_forest_50
545	545	random_forest_50	2.27747e+07	4772.28	0.3888	1.0555	3275.2	tf_random_forest_50
546	546	random_forest_50	2.40444e+07	4903.51	0.3547	1.0586	3416.23	tf_random_forest_50
547	547	random_forest_50	2.3449e+07	4842.42	0.3707	1.0572	3281.22	tf_random_forest_50
548	548	random_forest_50	2.25078e+07	4744.23	0.3959	1.0549	3210.93	tf_random_forest_50
549	549	random_forest_50	2.40449e+07	4903.56	0.3547	1.0586	3394.93	tf_random_forest_50
550	550	random_forest_100	2.28448e+07	4779.62	0.3869	1.0557	3283.69	tf_random_forest_100
551	551	random_forest_100	2.34957e+07	4847.23	0.3694	1.0573	3337.69	tf_random_forest_100
552	552	random_forest_100	2.2911e+07	4786.54	0.3851	1.0559	3301.81	tf_random_forest_100
553	553	random_forest_100	2.27641e+07	4771.17	0.3891	1.0555	3289.78	tf_random_forest_100
554	554	random_forest_100	2.27457e+07	4769.25	0.3895	1.0555	3289.73	tf_random_forest_100
555	555	random_forest_100	22440078	4737.1	0.3977	1.0547	3227.51	tf_random_forest_100
556	556	random_forest_100	2.2316e+07	4723.98	0.4011	1.0544	3239.64	tf_random_forest_100
557	557	random_forest_100	2.30608e+07	4802.17	0.3811	1.0562	3292.09	tf_random_forest_100
558	558	random_forest_100	2.22263e+07	4714.48	0.4035	1.0542	3207.4	tf_random_forest_100
559	559	random_forest_100	2.35721e+07	4855.11	0.3674	1.0575	3299.31	tf_random_forest_100
560	560	random_forest_100	2.34551e+07	4843.04	0.3705	1.0572	3356.91	tf_random_forest_100
561	561	random_forest_100	2.27978e+07	4774.7	0.3881	1.0556	3311.04	tf_random_forest_100
562	562	random_forest_100	2.29115e+07	4786.6	0.3851	1.0559	3286.56	tf_random_forest_100
563	563	random_forest_100	2.31395e+07	4810.35	0.379	1.0564	3285.47	tf_random_forest_100
564	564	random_forest_100	2.33555e+07	4832.75	0.3732	1.057	3243.09	tf_random_forest_100
565	565	random_forest_100	2.24929e+07	4742.67	0.3963	1.0549	3255.69	tf_random_forest_100
566	566	random_forest_100	2.27704e+07	4771.83	0.3889	1.0555	3306.34	tf_random_forest_100
567	567	random_forest_100	2.33663e+07	4833.87	0.3729	1.057	3313.35	tf_random_forest_100
568	568	random_forest_100	2.25031e+07	4743.74	0.3961	1.0549	3238.94	tf_random_forest_100
569	569	random_forest_100	2.24537e+07	4738.54	0.3974	1.0548	3267.78	tf_random_forest_100
570	570	random_forest_100	2.302e+07	4797.91	0.3822	1.0561	3294.4	tf_random_forest_100
571	571	random_forest_100	2.34122e+07	4838.62	0.3717	1.0571	3398.76	tf_random_forest_100
572	572	random_forest_100	2.27399e+07	4768.64	0.3897	1.0555	3263.73	tf_random_forest_100
573	573	random_forest_100	2.36854e+07	4866.76	0.3643	1.0578	3367.87	tf_random_forest_100
574	574	random_forest_100	2.30171e+07	4797.62	0.3823	1.0561	3322.33	tf_random_forest_100
575	575	random_forest_100	2.33271e+07	4829.81	0.3739	1.0569	3320.26	tf_random_forest_100
576	576	random_forest_100	2.32718e+07	4824.09	0.3754	1.0568	3341.45	tf_random_forest_100
577	577	random_forest_100	2.42403e+07	4923.44	0.3494	1.0591	3363.26	tf_random_forest_100
578	578	random_forest_100	2.3069e+07	4803.02	0.3809	1.0563	3301.07	tf_random_forest_100
579	579	random_forest_100	2.29376e+07	4789.32	0.3844	1.0559	3289.73	tf_random_forest_100
580	580	random_forest_100	2.38351e+07	4882.12	0.3603	1.0581	3384.32	tf_random_forest_100
581	581	random_forest_100	2.33298e+07	4830.1	0.3739	1.0569	3305.01	tf_random_forest_100
582	582	random_forest_100	2.33248e+07	4829.57	0.374	1.0569	3351.01	tf_random_forest_100
583	583	random_forest_100	2.27906e+07	4773.95	0.3883	1.0556	3307.68	tf_random_forest_100
584	584	random_forest_100	2.30176e+07	4797.66	0.3822	1.0561	3282.99	tf_random_forest_100
585	585	random_forest_100	2.29079e+07	4786.22	0.3852	1.0559	3257.36	tf_random_forest_100
586	586	random_forest_100	2.32565e+07	4822.49	0.3758	1.0567	3340	tf_random_forest_100
587	587	random_forest_100	2.33249e+07	4829.59	0.374	1.0569	3346.62	tf_random_forest_100
588	588	random_forest_100	2.33329e+07	4830.41	0.3738	1.0569	3355.16	tf_random_forest_100
589	589	random_forest_100	2.32129e+07	4817.98	0.377	1.0566	3370.9	tf_random_forest_100
590	590	random_forest_100	2.25979e+07	4753.73	0.3935	1.0551	3285.79	tf_random_forest_100
591	591	random_forest_100	2.28178e+07	4776.79	0.3876	1.0557	3301.23	tf_random_forest_100
592	592	random_forest_100	2.3171e+07	4813.62	0.3781	1.0565	3282.99	tf_random_forest_100
593	593	random_forest_100	2.33168e+07	4828.75	0.3742	1.0569	3367.02	tf_random_forest_100
594	594	random_forest_100	2.34523e+07	4842.75	0.3706	1.0572	3309.86	tf_random_forest_100
595	595	random_forest_100	2.38013e+07	4878.66	0.3612	1.0581	3354.68	tf_random_forest_100
596	596	random_forest_100	2.29736e+07	4793.08	0.3834	1.056	3302.89	tf_random_forest_100
597	597	random_forest_100	2.23675e+07	4729.43	0.3997	1.0546	3244.05	tf_random_forest_100
598	598	random_forest_100	2.30076e+07	4796.63	0.3825	1.0561	3291.84	tf_random_forest_100
599	599	random_forest_100	2.28194e+07	4776.96	0.3876	1.0557	3304.54	tf_random_forest_100
600	600	random_forest_1000	2.29329e+07	4788.83	0.3845	1.0559	3293.74	tf_random_forest_1000
601	601	random_forest_1000	2.29276e+07	4788.28	0.3847	1.0559	3288.13	tf_random_forest_1000
602	602	random_forest_1000	2.29932e+07	4795.13	0.3829	1.0561	3299.97	tf_random_forest_1000
603	603	random_forest_1000	2.33733e+07	4834.59	0.3727	1.057	3319.46	tf_random_forest_1000
604	604	random_forest_1000	2.2941e+07	4789.67	0.3843	1.056	3293.23	tf_random_forest_1000
605	605	random_forest_1000	2.28595e+07	4781.16	0.3865	1.0558	3286.34	tf_random_forest_1000
606	606	random_forest_1000	2.30057e+07	4796.43	0.3826	1.0561	3293.48	tf_random_forest_1000
607	607	random_forest_1000	2.31437e+07	4810.79	0.3789	1.0564	3318.31	tf_random_forest_1000
608	608	random_forest_1000	2.24436e+07	4737.47	0.3977	1.0547	3245.74	tf_random_forest_1000
609	609	random_forest_1000	2.31638e+07	4812.88	0.3783	1.0565	3306.28	tf_random_forest_1000
610	610	random_forest_1000	2.24381e+07	4736.88	0.3978	1.0547	3254.53	tf_random_forest_1000
611	611	random_forest_1000	2.31243e+07	4808.77	0.3794	1.0564	3291.66	tf_random_forest_1000
612	612	random_forest_1000	2.32327e+07	4820.04	0.3765	1.0567	3312.34	tf_random_forest_1000
613	613	random_forest_1000	2.29847e+07	4794.24	0.3831	1.0561	3294.26	tf_random_forest_1000
614	614	random_forest_1000	2.30412e+07	4800.12	0.3816	1.0562	3291.83	tf_random_forest_1000
615	615	random_forest_1000	2.28376e+07	4778.87	0.3871	1.0557	3290.66	tf_random_forest_1000
616	616	random_forest_1000	2.27626e+07	4771.02	0.3891	1.0555	3278.94	tf_random_forest_1000
617	617	random_forest_1000	2.29756e+07	4793.29	0.3834	1.056	3298.88	tf_random_forest_1000
618	618	random_forest_1000	2.28695e+07	4782.2	0.3862	1.0558	3284.49	tf_random_forest_1000
619	619	random_forest_1000	2.27854e+07	4773.4	0.3885	1.0556	3288.05	tf_random_forest_1000
620	620	random_forest_1000	2.28577e+07	4780.98	0.3865	1.0557	3272.49	tf_random_forest_1000
621	621	random_forest_1000	2.29602e+07	4791.69	0.3838	1.056	3285.19	tf_random_forest_1000
622	622	random_forest_1000	2.28776e+07	4783.05	0.386	1.0558	3295.01	tf_random_forest_1000
623	623	random_forest_1000	2.26557e+07	4759.8	0.392	1.0553	3277.9	tf_random_forest_1000
624	624	random_forest_1000	2.29087e+07	4786.3	0.3852	1.0559	3297.29	tf_random_forest_1000
625	625	random_forest_1000	2.28302e+07	4778.09	0.3873	1.0557	3272.6	tf_random_forest_1000
626	626	random_forest_1000	2.31051e+07	4806.77	0.3799	1.0564	3319.26	tf_random_forest_1000
627	627	random_forest_1000	2.29487e+07	4790.48	0.3841	1.056	3286.35	tf_random_forest_1000
628	628	random_forest_1000	2.25869e+07	4752.57	0.3938	1.0551	3257.99	tf_random_forest_1000
629	629	random_forest_1000	2.29136e+07	4786.81	0.385	1.0559	3294.84	tf_random_forest_1000
630	630	random_forest_1000	2.30631e+07	4802.4	0.381	1.0563	3309.02	tf_random_forest_1000
631	631	random_forest_1000	2.30279e+07	4798.74	0.382	1.0562	3293.87	tf_random_forest_1000
632	632	random_forest_1000	2.29606e+07	4791.72	0.3838	1.056	3296.73	tf_random_forest_1000
633	633	random_forest_1000	2.28364e+07	4778.75	0.3871	1.0557	3302.23	tf_random_forest_1000
634	634	random_forest_1000	2.29011e+07	4785.51	0.3854	1.0559	3284.97	tf_random_forest_1000
635	635	random_forest_1000	2.30752e+07	4803.66	0.3807	1.0563	3301.05	tf_random_forest_1000
636	636	random_forest_1000	2.30615e+07	4802.24	0.3811	1.0562	3297.15	tf_random_forest_1000
637	637	random_forest_1000	2.29192e+07	4787.4	0.3849	1.0559	3305.39	tf_random_forest_1000
638	638	random_forest_1000	2.29912e+07	4794.91	0.383	1.0561	3293.3	tf_random_forest_1000
639	639	random_forest_1000	2.28785e+07	4783.15	0.386	1.0558	3291.43	tf_random_forest_1000
640	640	random_forest_1000	2.30241e+07	4798.34	0.3821	1.0562	3296.1	tf_random_forest_1000
641	641	random_forest_1000	2.29762e+07	4793.35	0.3834	1.056	3292.52	tf_random_forest_1000
642	642	random_forest_1000	2.27212e+07	4766.68	0.3902	1.0554	3292.51	tf_random_forest_1000
643	643	random_forest_1000	2.28829e+07	4783.61	0.3859	1.0558	3278.96	tf_random_forest_1000
644	644	random_forest_1000	2.27966e+07	4774.58	0.3882	1.0556	3282.28	tf_random_forest_1000
645	645	random_forest_1000	2.29774e+07	4793.47	0.3833	1.056	3300.42	tf_random_forest_1000
646	646	random_forest_1000	2.28042e+07	4775.37	0.388	1.0556	3275.73	tf_random_forest_1000
647	647	random_forest_1000	2.30795e+07	4804.12	0.3806	1.0563	3318.75	tf_random_forest_1000
648	648	random_forest_1000	2.27824e+07	4773.09	0.3886	1.0556	3291.56	tf_random_forest_1000
649	649	random_forest_1000	2.29607e+07	4791.74	0.3838	1.056	3305.21	tf_random_forest_1000
650	650	mlp_100	2.77782e+07	5270.5	0.2545	1.0678	3531.22	tf_mlp_100
651	651	mlp_100	2.7783e+07	5270.95	0.2544	1.0678	3543.85	tf_mlp_100
652	652	mlp_100	2.77891e+07	5271.53	0.2542	1.0678	3535.66	tf_mlp_100
653	653	mlp_100	2.77801e+07	5270.68	0.2544	1.0678	3532.43	tf_mlp_100
654	654	mlp_100	2.77682e+07	5269.55	0.2547	1.0677	3534.51	tf_mlp_100
655	655	mlp_100	2.77747e+07	5270.17	0.2546	1.0677	3534.56	tf_mlp_100
656	656	mlp_100	2.77534e+07	5268.15	0.2551	1.0677	3532.93	tf_mlp_100
657	657	mlp_100	2.80538e+07	5296.58	0.2471	1.0684	3654.07	tf_mlp_100
658	658	mlp_100	2.7889e+07	5281	0.2515	1.068	3538.82	tf_mlp_100
659	659	mlp_100	2.80436e+07	5295.62	0.2474	1.0684	3631.19	tf_mlp_100
660	660	mlp_100	2.78884e+07	5280.95	0.2515	1.068	3577.34	tf_mlp_100
661	661	mlp_100	2.77715e+07	5269.87	0.2547	1.0677	3541.32	tf_mlp_100
662	662	mlp_100	2.79955e+07	5291.08	0.2486	1.0683	3628.6	tf_mlp_100
663	663	mlp_100	2.77565e+07	5268.44	0.2551	1.0677	3534.33	tf_mlp_100
664	664	mlp_100	2.77668e+07	5269.43	0.2548	1.0677	3534.92	tf_mlp_100
665	665	mlp_100	2.78987e+07	5281.92	0.2512	1.068	3591.7	tf_mlp_100
666	666	mlp_100	2.78709e+07	5279.29	0.252	1.068	3578.61	tf_mlp_100
667	667	mlp_100	2.80645e+07	5297.59	0.2468	1.0684	3633.29	tf_mlp_100
668	668	mlp_100	2.77358e+07	5266.48	0.2556	1.0676	3537.49	tf_mlp_100
669	669	mlp_100	2.77676e+07	5269.5	0.2548	1.0677	3539.99	tf_mlp_100
670	670	mlp_100	2.79657e+07	5288.26	0.2495	1.0682	3623.89	tf_mlp_100
671	671	mlp_100	2.79861e+07	5290.19	0.2489	1.0683	3617.61	tf_mlp_100
672	672	mlp_100	2.80622e+07	5297.38	0.2469	1.0684	3650.06	tf_mlp_100
673	673	mlp_100	2.79729e+07	5288.95	0.2493	1.0682	3593.62	tf_mlp_100
674	674	mlp_100	2.80144e+07	5292.86	0.2481	1.0683	3619.24	tf_mlp_100
675	675	mlp_100	2.7931e+07	5284.98	0.2504	1.0681	3581.05	tf_mlp_100
676	676	mlp_100	2.77673e+07	5269.47	0.2548	1.0677	3541.64	tf_mlp_100
677	677	mlp_100	2.80365e+07	5294.95	0.2475	1.0684	3648.52	tf_mlp_100
678	678	mlp_100	2.79094e+07	5282.94	0.251	1.0681	3589.65	tf_mlp_100
679	679	mlp_100	2.78944e+07	5281.51	0.2514	1.068	3574.62	tf_mlp_100
680	680	mlp_100	2.78492e+07	5277.24	0.2526	1.0679	3577.37	tf_mlp_100
681	681	mlp_100	2.80434e+07	5295.61	0.2474	1.0684	3635.73	tf_mlp_100
682	682	mlp_100	2.77865e+07	5271.29	0.2543	1.0678	3534.31	tf_mlp_100
683	683	mlp_100	2.77642e+07	5269.18	0.2549	1.0677	3532.73	tf_mlp_100
684	684	mlp_100	2.77903e+07	5271.65	0.2542	1.0678	3534.52	tf_mlp_100
685	685	mlp_100	2.79258e+07	5284.49	0.2505	1.0681	3587.18	tf_mlp_100
686	686	mlp_100	2.80122e+07	5292.65	0.2482	1.0683	3614.62	tf_mlp_100
687	687	mlp_100	2.77765e+07	5270.34	0.2545	1.0677	3534.49	tf_mlp_100
688	688	mlp_100	2.80861e+07	5299.63	0.2462	1.0685	3652.35	tf_mlp_100
689	689	mlp_100	2.80621e+07	5297.36	0.2469	1.0684	3641.04	tf_mlp_100
690	690	mlp_100	2.80513e+07	5296.35	0.2472	1.0684	3642.75	tf_mlp_100
691	691	mlp_100	2.80616e+07	5297.32	0.2469	1.0684	3654.01	tf_mlp_100
692	692	mlp_100	2.77555e+07	5268.35	0.2551	1.0677	3530.41	tf_mlp_100
693	693	mlp_100	2.80278e+07	5294.13	0.2478	1.0684	3633.22	tf_mlp_100
694	694	mlp_100	2.80033e+07	5291.82	0.2484	1.0683	3635.56	tf_mlp_100
695	695	mlp_100	2.80357e+07	5294.87	0.2476	1.0684	3637.77	tf_mlp_100
696	696	mlp_100	2.80511e+07	5296.33	0.2472	1.0684	3636.86	tf_mlp_100
697	697	mlp_100	2.80683e+07	5297.95	0.2467	1.0685	3638.2	tf_mlp_100
698	698	mlp_100	2.80549e+07	5296.69	0.2471	1.0684	3636.12	tf_mlp_100
699	699	mlp_100	2.77882e+07	5271.45	0.2542	1.0678	3534.26	tf_mlp_100
700	700	mlp_100_50	2.80374e+07	5295.04	0.2475	1.0684	3558.3	tf_mlp_100_50
701	701	mlp_100_50	2.7923e+07	5284.22	0.2506	1.0681	3553.17	tf_mlp_100_50
702	702	mlp_100_50	2.82208e+07	5312.32	0.2426	1.0688	3587.92	tf_mlp_100_50
703	703	mlp_100_50	2.84294e+07	5331.92	0.237	1.0693	3606.81	tf_mlp_100_50
704	704	mlp_100_50	2.79324e+07	5285.11	0.2503	1.0681	3542.72	tf_mlp_100_50
705	705	mlp_100_50	2.85535e+07	5343.55	0.2337	1.0696	3647.82	tf_mlp_100_50
706	706	mlp_100_50	2.79639e+07	5288.09	0.2495	1.0682	3553.54	tf_mlp_100_50
707	707	mlp_100_50	2.78895e+07	5281.05	0.2515	1.068	3534.88	tf_mlp_100_50
708	708	mlp_100_50	2.82032e+07	5310.66	0.2431	1.0688	3576.82	tf_mlp_100_50
709	709	mlp_100_50	2.7999e+07	5291.41	0.2486	1.0683	3560.76	tf_mlp_100_50
710	710	mlp_100_50	2.79146e+07	5283.43	0.2508	1.0681	3557.03	tf_mlp_100_50
711	711	mlp_100_50	2.81881e+07	5309.25	0.2435	1.0688	3581.27	tf_mlp_100_50
712	712	mlp_100_50	2.86782e+07	5355.2	0.2303	1.0699	3675.09	tf_mlp_100_50
713	713	mlp_100_50	2.78668e+07	5278.9	0.2521	1.068	3537.25	tf_mlp_100_50
714	714	mlp_100_50	2.79995e+07	5291.46	0.2485	1.0683	3559.84	tf_mlp_100_50
715	715	mlp_100_50	2.77415e+07	5267.02	0.2555	1.0677	3555.45	tf_mlp_100_50
716	716	mlp_100_50	2.77601e+07	5268.78	0.255	1.0677	3511.83	tf_mlp_100_50
717	717	mlp_100_50	2.79032e+07	5282.35	0.2511	1.0681	3541.08	tf_mlp_100_50
718	718	mlp_100_50	2.82176e+07	5312.03	0.2427	1.0688	3572.17	tf_mlp_100_50
719	719	mlp_100_50	2.77764e+07	5270.34	0.2545	1.0677	3519.68	tf_mlp_100_50
720	720	mlp_100_50	2.80902e+07	5300.02	0.2461	1.0685	3577.59	tf_mlp_100_50
721	721	mlp_100_50	2.80544e+07	5296.64	0.2471	1.0684	3588.55	tf_mlp_100_50
722	722	mlp_100_50	2.79872e+07	5290.3	0.2489	1.0683	3552.21	tf_mlp_100_50
723	723	mlp_100_50	2.78515e+07	5277.45	0.2525	1.0679	3529.1	tf_mlp_100_50
724	724	mlp_100_50	2.83851e+07	5327.77	0.2382	1.0692	3614.31	tf_mlp_100_50
725	725	mlp_100_50	2.82569e+07	5315.72	0.2416	1.0689	3581.08	tf_mlp_100_50
726	726	mlp_100_50	2.79867e+07	5290.25	0.2489	1.0683	3567.19	tf_mlp_100_50
727	727	mlp_100_50	2.78638e+07	5278.62	0.2522	1.068	3528.84	tf_mlp_100_50
728	728	mlp_100_50	2.83184e+07	5321.5	0.24	1.0691	3591.2	tf_mlp_100_50
729	729	mlp_100_50	2.79628e+07	5287.99	0.2495	1.0682	3545.71	tf_mlp_100_50
730	730	mlp_100_50	2.80244e+07	5293.8	0.2479	1.0684	3557.84	tf_mlp_100_50
731	731	mlp_100_50	2.81763e+07	5308.14	0.2438	1.0687	3588.1	tf_mlp_100_50
732	732	mlp_100_50	2.78825e+07	5280.39	0.2517	1.068	3533.44	tf_mlp_100_50
733	733	mlp_100_50	2.84432e+07	5333.21	0.2366	1.0694	3626.61	tf_mlp_100_50
734	734	mlp_100_50	2.77505e+07	5267.87	0.2552	1.0677	3518.78	tf_mlp_100_50
735	735	mlp_100_50	2.79621e+07	5287.92	0.2495	1.0682	3543.51	tf_mlp_100_50
736	736	mlp_100_50	2.83784e+07	5327.14	0.2384	1.0692	3596.82	tf_mlp_100_50
737	737	mlp_100_50	2.78453e+07	5276.87	0.2527	1.0679	3540.43	tf_mlp_100_50
738	738	mlp_100_50	2.82476e+07	5314.85	0.2419	1.0689	3586.75	tf_mlp_100_50
739	739	mlp_100_50	2.80381e+07	5295.1	0.2475	1.0684	3565.3	tf_mlp_100_50
740	740	mlp_100_50	2.85472e+07	5342.95	0.2338	1.0696	3624.6	tf_mlp_100_50
741	741	mlp_100_50	2.82056e+07	5310.9	0.243	1.0688	3577.13	tf_mlp_100_50
742	742	mlp_100_50	2.83582e+07	5325.24	0.2389	1.0692	3607.37	tf_mlp_100_50
743	743	mlp_100_50	2.81301e+07	5303.78	0.245	1.0686	3584.22	tf_mlp_100_50
744	744	mlp_100_50	2.79954e+07	5291.07	0.2487	1.0683	3529.73	tf_mlp_100_50
745	745	mlp_100_50	2.80186e+07	5293.26	0.248	1.0683	3545.63	tf_mlp_100_50
746	746	mlp_100_50	2.78521e+07	5277.51	0.2525	1.0679	3524.11	tf_mlp_100_50
747	747	mlp_100_50	2.79445e+07	5286.25	0.25	1.0682	3523.37	tf_mlp_100_50
748	748	mlp_100_50	2.79098e+07	5282.97	0.2509	1.0681	3539.18	tf_mlp_100_50
749	749	mlp_100_50	2.7716e+07	5264.6	0.2562	1.0676	3503.6	tf_mlp_100_50
750	750	mlp_100_100_50	2.77078e+07	5263.82	0.2564	1.0676	3450.15	tf_mlp_100_100_50
751	751	mlp_100_100_50	2.76735e+07	5260.56	0.2573	1.0675	3463.11	tf_mlp_100_100_50
752	752	mlp_100_100_50	2.75801e+07	5251.68	0.2598	1.0673	3435.18	tf_mlp_100_100_50
753	753	mlp_100_100_50	2.79724e+07	5288.89	0.2493	1.0682	3499.59	tf_mlp_100_100_50
754	754	mlp_100_100_50	2.75118e+07	5245.17	0.2616	1.0671	3429.97	tf_mlp_100_100_50
755	755	mlp_100_100_50	2.80936e+07	5300.34	0.246	1.0685	3515.05	tf_mlp_100_100_50
756	756	mlp_100_100_50	2.78457e+07	5276.91	0.2527	1.0679	3480.92	tf_mlp_100_100_50
757	757	mlp_100_100_50	2.76858e+07	5261.73	0.257	1.0675	3448.32	tf_mlp_100_100_50
758	758	mlp_100_100_50	2.76349e+07	5256.89	0.2583	1.0674	3434.09	tf_mlp_100_100_50
759	759	mlp_100_100_50	2.76084e+07	5254.37	0.259	1.0673	3443.16	tf_mlp_100_100_50
760	760	mlp_100_100_50	2.77155e+07	5264.55	0.2562	1.0676	3458.88	tf_mlp_100_100_50
761	761	mlp_100_100_50	2.78807e+07	5280.22	0.2517	1.068	3472.87	tf_mlp_100_100_50
762	762	mlp_100_100_50	2.76282e+07	5256.25	0.2585	1.0674	3449.26	tf_mlp_100_100_50
763	763	mlp_100_100_50	2.76435e+07	5257.7	0.2581	1.0674	3450.13	tf_mlp_100_100_50
764	764	mlp_100_100_50	2.77238e+07	5265.34	0.2559	1.0676	3466.44	tf_mlp_100_100_50
765	765	mlp_100_100_50	2.78407e+07	5276.43	0.2528	1.0679	3492.89	tf_mlp_100_100_50
766	766	mlp_100_100_50	2.75985e+07	5253.42	0.2593	1.0673	3448.52	tf_mlp_100_100_50
767	767	mlp_100_100_50	2.77946e+07	5272.06	0.254	1.0678	3471.27	tf_mlp_100_100_50
768	768	mlp_100_100_50	2.76424e+07	5257.6	0.2581	1.0674	3449.29	tf_mlp_100_100_50
769	769	mlp_100_100_50	2.78705e+07	5279.25	0.252	1.068	3494.57	tf_mlp_100_100_50
770	770	mlp_100_100_50	2.76287e+07	5256.31	0.2585	1.0674	3456.21	tf_mlp_100_100_50
771	771	mlp_100_100_50	2.79543e+07	5287.18	0.2498	1.0682	3483.97	tf_mlp_100_100_50
772	772	mlp_100_100_50	2.75743e+07	5251.13	0.26	1.0673	3430.2	tf_mlp_100_100_50
773	773	mlp_100_100_50	2.78903e+07	5281.13	0.2515	1.068	3483.86	tf_mlp_100_100_50
774	774	mlp_100_100_50	2.77423e+07	5267.1	0.2554	1.0677	3469.05	tf_mlp_100_100_50
775	775	mlp_100_100_50	2.76221e+07	5255.67	0.2587	1.0674	3452.05	tf_mlp_100_100_50
776	776	mlp_100_100_50	2.80147e+07	5292.9	0.2481	1.0683	3478.68	tf_mlp_100_100_50
777	777	mlp_100_100_50	2.76342e+07	5256.82	0.2583	1.0674	3448.45	tf_mlp_100_100_50
778	778	mlp_100_100_50	2.76598e+07	5259.26	0.2577	1.0675	3464.3	tf_mlp_100_100_50
779	779	mlp_100_100_50	2.81285e+07	5303.63	0.2451	1.0686	3527.92	tf_mlp_100_100_50
780	780	mlp_100_100_50	2.77285e+07	5265.78	0.2558	1.0676	3460.84	tf_mlp_100_100_50
781	781	mlp_100_100_50	2.78093e+07	5273.45	0.2536	1.0678	3469.69	tf_mlp_100_100_50
782	782	mlp_100_100_50	2.82442e+07	5314.52	0.242	1.0689	3526.58	tf_mlp_100_100_50
783	783	mlp_100_100_50	2.76667e+07	5259.91	0.2575	1.0675	3453.49	tf_mlp_100_100_50
784	784	mlp_100_100_50	2.81132e+07	5302.19	0.2455	1.0686	3513.07	tf_mlp_100_100_50
785	785	mlp_100_100_50	2.77489e+07	5267.72	0.2553	1.0677	3485.2	tf_mlp_100_100_50
786	786	mlp_100_100_50	2.78401e+07	5276.37	0.2528	1.0679	3481.43	tf_mlp_100_100_50
787	787	mlp_100_100_50	2.7629e+07	5256.33	0.2585	1.0674	3442.56	tf_mlp_100_100_50
788	788	mlp_100_100_50	2.76023e+07	5253.79	0.2592	1.0673	3452.49	tf_mlp_100_100_50
789	789	mlp_100_100_50	2.78415e+07	5276.51	0.2528	1.0679	3476.85	tf_mlp_100_100_50
790	790	mlp_100_100_50	2.79574e+07	5287.48	0.2497	1.0682	3501.47	tf_mlp_100_100_50
791	791	mlp_100_100_50	2.76094e+07	5254.47	0.259	1.0673	3450.57	tf_mlp_100_100_50
792	792	mlp_100_100_50	2.76634e+07	5259.6	0.2576	1.0675	3447.22	tf_mlp_100_100_50
793	793	mlp_100_100_50	2.77107e+07	5264.09	0.2563	1.0676	3444.24	tf_mlp_100_100_50
794	794	mlp_100_100_50	2.76105e+07	5254.57	0.259	1.0673	3459.78	tf_mlp_100_100_50
795	795	mlp_100_100_50	2.77001e+07	5263.09	0.2566	1.0676	3458.54	tf_mlp_100_100_50
796	796	mlp_100_100_50	2.76531e+07	5258.62	0.2578	1.0674	3460.17	tf_mlp_100_100_50
797	797	mlp_100_100_50	2.80512e+07	5296.34	0.2472	1.0684	3525.66	tf_mlp_100_100_50
798	798	mlp_100_100_50	2.79097e+07	5282.96	0.251	1.0681	3483.99	tf_mlp_100_100_50
799	799	mlp_100_100_50	2.77652e+07	5269.27	0.2548	1.0677	3467.95	tf_mlp_100_100_50
800	800	decision_tree	4.15619e+07	6446.85	-0.1154	1.1014	4255.07	tf_decision_tree
801	801	decision_tree	3.82154e+07	6181.86	-0.0256	1.0932	4061.54	tf_decision_tree
802	802	decision_tree	4.02555e+07	6344.73	-0.0804	1.0982	4152.6	tf_decision_tree
803	803	decision_tree	4.41766e+07	6646.55	-0.1856	1.1077	4166.48	tf_decision_tree
804	804	decision_tree	3.60842e+07	6007.01	0.0316	1.088	4073.13	tf_decision_tree
805	805	decision_tree	3.67597e+07	6062.98	0.0134	1.0897	4003.59	tf_decision_tree
806	806	decision_tree	3.8434e+07	6199.51	-0.0315	1.0937	4075.44	tf_decision_tree
807	807	decision_tree	4.92315e+07	7016.52	-0.3213	1.1201	4453.92	tf_decision_tree
808	808	decision_tree	4.00699e+07	6330.08	-0.0754	1.0977	4132.42	tf_decision_tree
809	809	decision_tree	4.36212e+07	6604.63	-0.1707	1.1064	4250.21	tf_decision_tree
810	810	decision_tree	4.13869e+07	6433.26	-0.1108	1.1009	4195.95	tf_decision_tree
811	811	decision_tree	4.45315e+07	6673.19	-0.1951	1.1086	4333.52	tf_decision_tree
812	812	decision_tree	3.83098e+07	6189.49	-0.0282	1.0934	4119.79	tf_decision_tree
813	813	decision_tree	4.13436e+07	6429.9	-0.1096	1.1008	4308.77	tf_decision_tree
814	814	decision_tree	4.18276e+07	6467.42	-0.1226	1.102	4261.87	tf_decision_tree
815	815	decision_tree	3.95738e+07	6290.77	-0.0621	1.0965	4094.65	tf_decision_tree
816	816	decision_tree	3.92679e+07	6266.41	-0.0539	1.0958	3998.76	tf_decision_tree
817	817	decision_tree	4.23482e+07	6507.55	-0.1366	1.1033	4247.1	tf_decision_tree
818	818	decision_tree	4.06643e+07	6376.86	-0.0914	1.0992	4159.11	tf_decision_tree
819	819	decision_tree	3.92759e+07	6267.05	-0.0541	1.0958	4208.69	tf_decision_tree
820	820	decision_tree	4.54393e+07	6740.87	-0.2195	1.1108	4189.02	tf_decision_tree
821	821	decision_tree	4.45545e+07	6674.92	-0.1958	1.1087	4394.45	tf_decision_tree
822	822	decision_tree	4.16251e+07	6451.75	-0.1171	1.1015	4199.09	tf_decision_tree
823	823	decision_tree	4.32384e+07	6575.59	-0.1604	1.1055	4240.34	tf_decision_tree
824	824	decision_tree	4.11835e+07	6417.44	-0.1053	1.1004	4106.24	tf_decision_tree
825	825	decision_tree	4.87213e+07	6980.06	-0.3076	1.1188	4344.45	tf_decision_tree
826	826	decision_tree	3.75657e+07	6129.09	-0.0082	1.0916	4127.43	tf_decision_tree
827	827	decision_tree	3.61889e+07	6015.72	0.0288	1.0883	4012.53	tf_decision_tree
828	828	decision_tree	3.78189e+07	6149.71	-0.015	1.0922	4233.72	tf_decision_tree
829	829	decision_tree	4.3046e+07	6560.95	-0.1553	1.105	4323.59	tf_decision_tree
830	830	decision_tree	3.54877e+07	5957.16	0.0476	1.0866	4048.29	tf_decision_tree
831	831	decision_tree	3.62872e+07	6023.89	0.0261	1.0885	4017.77	tf_decision_tree
832	832	decision_tree	3.8943e+07	6240.44	-0.0452	1.095	4074.78	tf_decision_tree
833	833	decision_tree	3.90368e+07	6247.95	-0.0477	1.0952	4069.81	tf_decision_tree
834	834	decision_tree	4.05993e+07	6371.76	-0.0896	1.099	4382.73	tf_decision_tree
835	835	decision_tree	3.56074e+07	5967.19	0.0444	1.0868	3960.54	tf_decision_tree
836	836	decision_tree	4.01637e+07	6337.48	-0.0779	1.098	4073.13	tf_decision_tree
837	837	decision_tree	3.73843e+07	6114.27	-0.0033	1.0912	4097.83	tf_decision_tree
838	838	decision_tree	4.01278e+07	6334.65	-0.077	1.0979	4255.55	tf_decision_tree
839	839	decision_tree	4.13106e+07	6427.33	-0.1087	1.1008	4336.37	tf_decision_tree
840	840	decision_tree	3.70307e+07	6085.29	0.0062	1.0903	4154.19	tf_decision_tree
841	841	decision_tree	4.11213e+07	6412.59	-0.1036	1.1003	4132.73	tf_decision_tree
842	842	decision_tree	3.7715e+07	6141.25	-0.0122	1.092	4142.66	tf_decision_tree
843	843	decision_tree	4.89752e+07	6998.23	-0.3144	1.1195	4333.06	tf_decision_tree
844	844	decision_tree	4.29134e+07	6550.83	-0.1517	1.1047	4388.03	tf_decision_tree
845	845	decision_tree	3.61267e+07	6010.55	0.0304	1.0881	4136.17	tf_decision_tree
846	846	decision_tree	3.86984e+07	6220.81	-0.0386	1.0944	4208.89	tf_decision_tree
847	847	decision_tree	4.33654e+07	6585.24	-0.1639	1.1058	4181.21	tf_decision_tree
848	848	decision_tree	4.06739e+07	6377.61	-0.0916	1.0992	4234.05	tf_decision_tree
849	849	decision_tree	3.93464e+07	6272.67	-0.056	1.096	4079.75	tf_decision_tree
850	850	adaboost	2.51366e+07	5013.64	0.3254	1.0613	3870.91	tf_adaboost
851	851	adaboost	2.58985e+07	5089.05	0.3049	1.0632	3863.6	tf_adaboost
852	852	adaboost	2.66898e+07	5166.21	0.2837	1.0651	3913.35	tf_adaboost
853	853	adaboost	2.63855e+07	5136.68	0.2919	1.0644	3976.09	tf_adaboost
854	854	adaboost	2.56314e+07	5062.75	0.3121	1.0625	3824.8	tf_adaboost
855	855	adaboost	2.4474e+07	4947.12	0.3432	1.0597	3721.11	tf_adaboost
856	856	adaboost	2.51547e+07	5015.44	0.3249	1.0614	3849.62	tf_adaboost
857	857	adaboost	2.53867e+07	5038.52	0.3187	1.0619	3899.84	tf_adaboost
858	858	adaboost	2.61965e+07	5118.25	0.2969	1.0639	3912.73	tf_adaboost
859	859	adaboost	2.57845e+07	5077.85	0.308	1.0629	3862.48	tf_adaboost
860	860	adaboost	2.66266e+07	5160.1	0.2854	1.0649	3916.77	tf_adaboost
861	861	adaboost	2.6348e+07	5133.03	0.2929	1.0643	3915.52	tf_adaboost
862	862	adaboost	2.56328e+07	5062.88	0.3121	1.0625	3871.72	tf_adaboost
863	863	adaboost	2.68919e+07	5185.74	0.2783	1.0656	3928.35	tf_adaboost
864	864	adaboost	2.76994e+07	5263.02	0.2566	1.0676	4048.61	tf_adaboost
865	865	adaboost	2.66511e+07	5162.47	0.2847	1.065	3885.12	tf_adaboost
866	866	adaboost	2.71923e+07	5214.62	0.2702	1.0663	3934.72	tf_adaboost
867	867	adaboost	2.62173e+07	5120.28	0.2964	1.0639	3927.13	tf_adaboost
868	868	adaboost	2.72941e+07	5224.38	0.2675	1.0666	4027.52	tf_adaboost
869	869	adaboost	2.58284e+07	5082.17	0.3068	1.063	3852.06	tf_adaboost
870	870	adaboost	2.66114e+07	5158.62	0.2858	1.0649	3885.45	tf_adaboost
871	871	adaboost	2.57914e+07	5078.52	0.3078	1.0629	3859.08	tf_adaboost
872	872	adaboost	2.66201e+07	5159.46	0.2856	1.0649	3889.1	tf_adaboost
873	873	adaboost	2.49211e+07	4992.11	0.3312	1.0608	3821.49	tf_adaboost
874	874	adaboost	2.79358e+07	5285.43	0.2503	1.0681	3998.46	tf_adaboost
875	875	adaboost	2.67782e+07	5174.76	0.2813	1.0653	3892.83	tf_adaboost
876	876	adaboost	2.65092e+07	5148.71	0.2885	1.0647	3974.64	tf_adaboost
877	877	adaboost	2.66224e+07	5159.69	0.2855	1.0649	3934.46	tf_adaboost
878	878	adaboost	2.6303e+07	5128.64	0.2941	1.0642	3917.35	tf_adaboost
879	879	adaboost	2.67045e+07	5167.64	0.2833	1.0651	4001.03	tf_adaboost
880	880	adaboost	2.57795e+07	5077.35	0.3081	1.0629	3832.76	tf_adaboost
881	881	adaboost	2.71444e+07	5210.03	0.2715	1.0662	3982.61	tf_adaboost
882	882	adaboost	2.57682e+07	5076.24	0.3084	1.0628	3827.48	tf_adaboost
883	883	adaboost	2.58521e+07	5084.49	0.3062	1.0631	3904.79	tf_adaboost
884	884	adaboost	2.55707e+07	5056.75	0.3137	1.0624	3842.81	tf_adaboost
885	885	adaboost	2.53896e+07	5038.81	0.3186	1.0619	3890.24	tf_adaboost
886	886	adaboost	2.6465e+07	5144.42	0.2897	1.0645	3910.19	tf_adaboost
887	887	adaboost	2.58903e+07	5088.25	0.3052	1.0631	3873.15	tf_adaboost
888	888	adaboost	2.48316e+07	4983.13	0.3336	1.0606	3843.68	tf_adaboost
889	889	adaboost	2.60563e+07	5104.54	0.3007	1.0636	3902.85	tf_adaboost
890	890	adaboost	2.60671e+07	5105.59	0.3004	1.0636	3837.79	tf_adaboost
891	891	adaboost	2.62324e+07	5121.76	0.296	1.064	3828.1	tf_adaboost
892	892	adaboost	2.58506e+07	5084.35	0.3062	1.063	3918.81	tf_adaboost
893	893	adaboost	2.78812e+07	5280.27	0.2517	1.068	3982.61	tf_adaboost
894	894	adaboost	2.67288e+07	5169.99	0.2826	1.0652	3948.2	tf_adaboost
895	895	adaboost	2.6696e+07	5166.81	0.2835	1.0651	3953.81	tf_adaboost
896	896	adaboost	2.54252e+07	5042.34	0.3176	1.062	3890.65	tf_adaboost
897	897	adaboost	2.55056e+07	5050.3	0.3155	1.0622	3856.2	tf_adaboost
898	898	adaboost	2.5535e+07	5053.22	0.3147	1.0623	3931.67	tf_adaboost
899	899	adaboost	2.59462e+07	5093.74	0.3036	1.0633	3889.13	tf_adaboost
900	900	bagging	2.53253e+07	5032.42	0.3203	1.0618	3311.09	tf_bagging
901	901	bagging	2.70793e+07	5203.78	0.2732	1.066	3564.29	tf_bagging
902	902	bagging	2.67314e+07	5170.24	0.2826	1.0652	3534.55	tf_bagging
903	903	bagging	26528740	5150.61	0.288	1.0647	3560.87	tf_bagging
904	904	bagging	2.84254e+07	5331.55	0.2371	1.0693	3663.82	tf_bagging
905	905	bagging	2.62954e+07	5127.91	0.2943	1.0641	3510.45	tf_bagging
906	906	bagging	25773974	5076.81	0.3083	1.0629	3450.99	tf_bagging
907	907	bagging	2.74084e+07	5235.3	0.2644	1.0668	3511.81	tf_bagging
908	908	bagging	2.48344e+07	4983.41	0.3335	1.0606	3395.89	tf_bagging
909	909	bagging	2.44187e+07	4941.53	0.3446	1.0596	3302.45	tf_bagging
910	910	bagging	2.55508e+07	5054.78	0.3143	1.0623	3533.21	tf_bagging
911	911	bagging	2.60193e+07	5100.92	0.3017	1.0635	3525.05	tf_bagging
912	912	bagging	2.61214e+07	5110.91	0.2989	1.0637	3511.87	tf_bagging
913	913	bagging	2.37186e+07	4870.17	0.3634	1.0578	3328.75	tf_bagging
914	914	bagging	2.50448e+07	5004.48	0.3278	1.0611	3583.28	tf_bagging
915	915	bagging	2.49275e+07	4992.74	0.331	1.0608	3292.46	tf_bagging
916	916	bagging	2.5141e+07	5014.08	0.3253	1.0613	3313.14	tf_bagging
917	917	bagging	2.42383e+07	4923.24	0.3495	1.0591	3384.76	tf_bagging
918	918	bagging	2.57659e+07	5076.01	0.3085	1.0628	3456.73	tf_bagging
919	919	bagging	2.42245e+07	4921.84	0.3499	1.0591	3309.09	tf_bagging
920	920	bagging	2.40255e+07	4901.58	0.3552	1.0586	3348.58	tf_bagging
921	921	bagging	2.40194e+07	4900.96	0.3554	1.0586	3274.05	tf_bagging
922	922	bagging	2.38979e+07	4888.55	0.3586	1.0583	3432.69	tf_bagging
923	923	bagging	2.58087e+07	5080.23	0.3073	1.0629	3477.53	tf_bagging
924	924	bagging	2.73941e+07	5233.94	0.2648	1.0668	3554.58	tf_bagging
925	925	bagging	2.56555e+07	5065.13	0.3115	1.0626	3500.39	tf_bagging
926	926	bagging	2.69976e+07	5195.92	0.2754	1.0658	3598.46	tf_bagging
927	927	bagging	2.66719e+07	5164.48	0.2842	1.0651	3468.73	tf_bagging
928	928	bagging	2.34274e+07	4840.19	0.3712	1.0571	3227.44	tf_bagging
929	929	bagging	2.37258e+07	4870.91	0.3632	1.0579	3414.58	tf_bagging
930	930	bagging	2.29712e+07	4792.83	0.3835	1.056	3353.8	tf_bagging
931	931	bagging	2.60452e+07	5103.45	0.301	1.0635	3523.87	tf_bagging
932	932	bagging	2.67555e+07	5172.57	0.2819	1.0653	3613.19	tf_bagging
933	933	bagging	2.42188e+07	4921.26	0.35	1.0591	3379.41	tf_bagging
934	934	bagging	2.28353e+07	4778.63	0.3871	1.0557	3241.72	tf_bagging
935	935	bagging	2.69362e+07	5190.01	0.2771	1.0657	3456.37	tf_bagging
936	936	bagging	2.66335e+07	5160.77	0.2852	1.065	3613.54	tf_bagging
937	937	bagging	2.47133e+07	4971.24	0.3367	1.0603	3360.5	tf_bagging
938	938	bagging	2.41667e+07	4915.96	0.3514	1.0589	3344.59	tf_bagging
939	939	bagging	2.8097e+07	5300.66	0.2459	1.0685	3487.88	tf_bagging
940	940	bagging	2.6233e+07	5121.82	0.296	1.064	3415.67	tf_bagging
941	941	bagging	2.44624e+07	4945.95	0.3435	1.0597	3470.78	tf_bagging
942	942	bagging	2.51224e+07	5012.23	0.3258	1.0613	3460.31	tf_bagging
943	943	bagging	2.51913e+07	5019.09	0.3239	1.0614	3442.5	tf_bagging
944	944	bagging	2.55477e+07	5054.47	0.3143	1.0623	3511.13	tf_bagging
945	945	bagging	2.24797e+07	4741.27	0.3967	1.0548	3171.59	tf_bagging
946	946	bagging	2.62787e+07	5126.28	0.2947	1.0641	3407.11	tf_bagging
947	947	bagging	2.54145e+07	5041.28	0.3179	1.062	3498.78	tf_bagging
948	948	bagging	2.44146e+07	4941.12	0.3448	1.0595	3447.14	tf_bagging
[truncated: 10,001 more rows]

## Sheet: tf-idf
	Unnamed: 0	algorithm	mse	rmse	r2	adj_r2	mae	alg_ab
0	0	linear_regression	3.62537e+07	6021.1	0.1831	1.1385	4176.29	tf_idf_linear_regression
1	1	linear_regression	3.62537e+07	6021.1	0.1831	1.1385	4176.29	tf_idf_linear_regression
2	2	linear_regression	3.62537e+07	6021.1	0.1831	1.1385	4176.29	tf_idf_linear_regression
3	3	linear_regression	3.62537e+07	6021.1	0.1831	1.1385	4176.29	tf_idf_linear_regression
4	4	linear_regression	3.62537e+07	6021.1	0.1831	1.1385	4176.29	tf_idf_linear_regression
5	5	linear_regression	3.62537e+07	6021.1	0.1831	1.1385	4176.29	tf_idf_linear_regression
6	6	linear_regression	3.62537e+07	6021.1	0.1831	1.1385	4176.29	tf_idf_linear_regression
7	7	linear_regression	3.62537e+07	6021.1	0.1831	1.1385	4176.29	tf_idf_linear_regression
8	8	linear_regression	3.62537e+07	6021.1	0.1831	1.1385	4176.29	tf_idf_linear_regression
9	9	linear_regression	3.62537e+07	6021.1	0.1831	1.1385	4176.29	tf_idf_linear_regression
10	10	linear_regression	3.62537e+07	6021.1	0.1831	1.1385	4176.29	tf_idf_linear_regression
11	11	linear_regression	3.62537e+07	6021.1	0.1831	1.1385	4176.29	tf_idf_linear_regression
12	12	linear_regression	3.62537e+07	6021.1	0.1831	1.1385	4176.29	tf_idf_linear_regression
13	13	linear_regression	3.62537e+07	6021.1	0.1831	1.1385	4176.29	tf_idf_linear_regression
14	14	linear_regression	3.62537e+07	6021.1	0.1831	1.1385	4176.29	tf_idf_linear_regression
15	15	linear_regression	3.62537e+07	6021.1	0.1831	1.1385	4176.29	tf_idf_linear_regression
16	16	linear_regression	3.62537e+07	6021.1	0.1831	1.1385	4176.29	tf_idf_linear_regression
17	17	linear_regression	3.62537e+07	6021.1	0.1831	1.1385	4176.29	tf_idf_linear_regression
18	18	linear_regression	3.62537e+07	6021.1	0.1831	1.1385	4176.29	tf_idf_linear_regression
19	19	linear_regression	3.62537e+07	6021.1	0.1831	1.1385	4176.29	tf_idf_linear_regression
20	20	linear_regression	3.62537e+07	6021.1	0.1831	1.1385	4176.29	tf_idf_linear_regression
21	21	linear_regression	3.62537e+07	6021.1	0.1831	1.1385	4176.29	tf_idf_linear_regression
22	22	linear_regression	3.62537e+07	6021.1	0.1831	1.1385	4176.29	tf_idf_linear_regression
23	23	linear_regression	3.62537e+07	6021.1	0.1831	1.1385	4176.29	tf_idf_linear_regression
24	24	linear_regression	3.62537e+07	6021.1	0.1831	1.1385	4176.29	tf_idf_linear_regression
25	25	linear_regression	3.62537e+07	6021.1	0.1831	1.1385	4176.29	tf_idf_linear_regression
26	26	linear_regression	3.62537e+07	6021.1	0.1831	1.1385	4176.29	tf_idf_linear_regression
27	27	linear_regression	3.62537e+07	6021.1	0.1831	1.1385	4176.29	tf_idf_linear_regression
28	28	linear_regression	3.62537e+07	6021.1	0.1831	1.1385	4176.29	tf_idf_linear_regression
29	29	linear_regression	3.62537e+07	6021.1	0.1831	1.1385	4176.29	tf_idf_linear_regression
30	30	linear_regression	3.62537e+07	6021.1	0.1831	1.1385	4176.29	tf_idf_linear_regression
31	31	linear_regression	3.62537e+07	6021.1	0.1831	1.1385	4176.29	tf_idf_linear_regression
32	32	linear_regression	3.62537e+07	6021.1	0.1831	1.1385	4176.29	tf_idf_linear_regression
33	33	linear_regression	3.62537e+07	6021.1	0.1831	1.1385	4176.29	tf_idf_linear_regression
34	34	linear_regression	3.62537e+07	6021.1	0.1831	1.1385	4176.29	tf_idf_linear_regression
35	35	linear_regression	3.62537e+07	6021.1	0.1831	1.1385	4176.29	tf_idf_linear_regression
36	36	linear_regression	3.62537e+07	6021.1	0.1831	1.1385	4176.29	tf_idf_linear_regression
37	37	linear_regression	3.62537e+07	6021.1	0.1831	1.1385	4176.29	tf_idf_linear_regression
38	38	linear_regression	3.62537e+07	6021.1	0.1831	1.1385	4176.29	tf_idf_linear_regression
39	39	linear_regression	3.62537e+07	6021.1	0.1831	1.1385	4176.29	tf_idf_linear_regression
40	40	linear_regression	3.62537e+07	6021.1	0.1831	1.1385	4176.29	tf_idf_linear_regression
41	41	linear_regression	3.62537e+07	6021.1	0.1831	1.1385	4176.29	tf_idf_linear_regression
42	42	linear_regression	3.62537e+07	6021.1	0.1831	1.1385	4176.29	tf_idf_linear_regression
43	43	linear_regression	3.62537e+07	6021.1	0.1831	1.1385	4176.29	tf_idf_linear_regression
44	44	linear_regression	3.62537e+07	6021.1	0.1831	1.1385	4176.29	tf_idf_linear_regression
45	45	linear_regression	3.62537e+07	6021.1	0.1831	1.1385	4176.29	tf_idf_linear_regression
46	46	linear_regression	3.62537e+07	6021.1	0.1831	1.1385	4176.29	tf_idf_linear_regression
47	47	linear_regression	3.62537e+07	6021.1	0.1831	1.1385	4176.29	tf_idf_linear_regression
48	48	linear_regression	3.62537e+07	6021.1	0.1831	1.1385	4176.29	tf_idf_linear_regression
49	49	linear_regression	3.62537e+07	6021.1	0.1831	1.1385	4176.29	tf_idf_linear_regression
50	50	svr_linear	3.2401e+07	5692.19	0.2699	1.1238	3733.44	tf_idf_svr_linear
51	51	svr_linear	3.2401e+07	5692.19	0.2699	1.1238	3733.44	tf_idf_svr_linear
52	52	svr_linear	3.2401e+07	5692.19	0.2699	1.1238	3733.44	tf_idf_svr_linear
53	53	svr_linear	3.2401e+07	5692.19	0.2699	1.1238	3733.44	tf_idf_svr_linear
54	54	svr_linear	3.2401e+07	5692.19	0.2699	1.1238	3733.44	tf_idf_svr_linear
55	55	svr_linear	3.2401e+07	5692.19	0.2699	1.1238	3733.44	tf_idf_svr_linear
56	56	svr_linear	3.2401e+07	5692.19	0.2699	1.1238	3733.44	tf_idf_svr_linear
57	57	svr_linear	3.2401e+07	5692.19	0.2699	1.1238	3733.44	tf_idf_svr_linear
58	58	svr_linear	3.2401e+07	5692.19	0.2699	1.1238	3733.44	tf_idf_svr_linear
59	59	svr_linear	3.2401e+07	5692.19	0.2699	1.1238	3733.44	tf_idf_svr_linear
60	60	svr_linear	3.2401e+07	5692.19	0.2699	1.1238	3733.44	tf_idf_svr_linear
61	61	svr_linear	3.2401e+07	5692.19	0.2699	1.1238	3733.44	tf_idf_svr_linear
62	62	svr_linear	3.2401e+07	5692.19	0.2699	1.1238	3733.44	tf_idf_svr_linear
63	63	svr_linear	3.2401e+07	5692.19	0.2699	1.1238	3733.44	tf_idf_svr_linear
64	64	svr_linear	3.2401e+07	5692.19	0.2699	1.1238	3733.44	tf_idf_svr_linear
65	65	svr_linear	3.2401e+07	5692.19	0.2699	1.1238	3733.44	tf_idf_svr_linear
66	66	svr_linear	3.2401e+07	5692.19	0.2699	1.1238	3733.44	tf_idf_svr_linear
67	67	svr_linear	3.2401e+07	5692.19	0.2699	1.1238	3733.44	tf_idf_svr_linear
68	68	svr_linear	3.2401e+07	5692.19	0.2699	1.1238	3733.44	tf_idf_svr_linear
69	69	svr_linear	3.2401e+07	5692.19	0.2699	1.1238	3733.44	tf_idf_svr_linear
70	70	svr_linear	3.2401e+07	5692.19	0.2699	1.1238	3733.44	tf_idf_svr_linear
71	71	svr_linear	3.2401e+07	5692.19	0.2699	1.1238	3733.44	tf_idf_svr_linear
72	72	svr_linear	3.2401e+07	5692.19	0.2699	1.1238	3733.44	tf_idf_svr_linear
73	73	svr_linear	3.2401e+07	5692.19	0.2699	1.1238	3733.44	tf_idf_svr_linear
74	74	svr_linear	3.2401e+07	5692.19	0.2699	1.1238	3733.44	tf_idf_svr_linear
75	75	svr_linear	3.2401e+07	5692.19	0.2699	1.1238	3733.44	tf_idf_svr_linear
76	76	svr_linear	3.2401e+07	5692.19	0.2699	1.1238	3733.44	tf_idf_svr_linear
77	77	svr_linear	3.2401e+07	5692.19	0.2699	1.1238	3733.44	tf_idf_svr_linear
78	78	svr_linear	3.2401e+07	5692.19	0.2699	1.1238	3733.44	tf_idf_svr_linear
79	79	svr_linear	3.2401e+07	5692.19	0.2699	1.1238	3733.44	tf_idf_svr_linear
80	80	svr_linear	3.2401e+07	5692.19	0.2699	1.1238	3733.44	tf_idf_svr_linear
81	81	svr_linear	3.2401e+07	5692.19	0.2699	1.1238	3733.44	tf_idf_svr_linear
82	82	svr_linear	3.2401e+07	5692.19	0.2699	1.1238	3733.44	tf_idf_svr_linear
83	83	svr_linear	3.2401e+07	5692.19	0.2699	1.1238	3733.44	tf_idf_svr_linear
84	84	svr_linear	3.2401e+07	5692.19	0.2699	1.1238	3733.44	tf_idf_svr_linear
85	85	svr_linear	3.2401e+07	5692.19	0.2699	1.1238	3733.44	tf_idf_svr_linear
86	86	svr_linear	3.2401e+07	5692.19	0.2699	1.1238	3733.44	tf_idf_svr_linear
87	87	svr_linear	3.2401e+07	5692.19	0.2699	1.1238	3733.44	tf_idf_svr_linear
88	88	svr_linear	3.2401e+07	5692.19	0.2699	1.1238	3733.44	tf_idf_svr_linear
89	89	svr_linear	3.2401e+07	5692.19	0.2699	1.1238	3733.44	tf_idf_svr_linear
90	90	svr_linear	3.2401e+07	5692.19	0.2699	1.1238	3733.44	tf_idf_svr_linear
91	91	svr_linear	3.2401e+07	5692.19	0.2699	1.1238	3733.44	tf_idf_svr_linear
92	92	svr_linear	3.2401e+07	5692.19	0.2699	1.1238	3733.44	tf_idf_svr_linear
93	93	svr_linear	3.2401e+07	5692.19	0.2699	1.1238	3733.44	tf_idf_svr_linear
94	94	svr_linear	3.2401e+07	5692.19	0.2699	1.1238	3733.44	tf_idf_svr_linear
95	95	svr_linear	3.2401e+07	5692.19	0.2699	1.1238	3733.44	tf_idf_svr_linear
96	96	svr_linear	3.2401e+07	5692.19	0.2699	1.1238	3733.44	tf_idf_svr_linear
97	97	svr_linear	3.2401e+07	5692.19	0.2699	1.1238	3733.44	tf_idf_svr_linear
98	98	svr_linear	3.2401e+07	5692.19	0.2699	1.1238	3733.44	tf_idf_svr_linear
99	99	svr_linear	3.2401e+07	5692.19	0.2699	1.1238	3733.44	tf_idf_svr_linear
100	100	svr_poly_2	4.64211e+07	6813.3	-0.046	1.1774	4763.15	tf_idf_svr_poly_2
101	101	svr_poly_2	4.64211e+07	6813.3	-0.046	1.1774	4763.15	tf_idf_svr_poly_2
102	102	svr_poly_2	4.64211e+07	6813.3	-0.046	1.1774	4763.15	tf_idf_svr_poly_2
103	103	svr_poly_2	4.64211e+07	6813.3	-0.046	1.1774	4763.15	tf_idf_svr_poly_2
104	104	svr_poly_2	4.64211e+07	6813.3	-0.046	1.1774	4763.15	tf_idf_svr_poly_2
105	105	svr_poly_2	4.64211e+07	6813.3	-0.046	1.1774	4763.15	tf_idf_svr_poly_2
106	106	svr_poly_2	4.64211e+07	6813.3	-0.046	1.1774	4763.15	tf_idf_svr_poly_2
107	107	svr_poly_2	4.64211e+07	6813.3	-0.046	1.1774	4763.15	tf_idf_svr_poly_2
108	108	svr_poly_2	4.64211e+07	6813.3	-0.046	1.1774	4763.15	tf_idf_svr_poly_2
109	109	svr_poly_2	4.64211e+07	6813.3	-0.046	1.1774	4763.15	tf_idf_svr_poly_2
110	110	svr_poly_2	4.64211e+07	6813.3	-0.046	1.1774	4763.15	tf_idf_svr_poly_2
111	111	svr_poly_2	4.64211e+07	6813.3	-0.046	1.1774	4763.15	tf_idf_svr_poly_2
112	112	svr_poly_2	4.64211e+07	6813.3	-0.046	1.1774	4763.15	tf_idf_svr_poly_2
113	113	svr_poly_2	4.64211e+07	6813.3	-0.046	1.1774	4763.15	tf_idf_svr_poly_2
114	114	svr_poly_2	4.64211e+07	6813.3	-0.046	1.1774	4763.15	tf_idf_svr_poly_2
115	115	svr_poly_2	4.64211e+07	6813.3	-0.046	1.1774	4763.15	tf_idf_svr_poly_2
116	116	svr_poly_2	4.64211e+07	6813.3	-0.046	1.1774	4763.15	tf_idf_svr_poly_2
117	117	svr_poly_2	4.64211e+07	6813.3	-0.046	1.1774	4763.15	tf_idf_svr_poly_2
118	118	svr_poly_2	4.64211e+07	6813.3	-0.046	1.1774	4763.15	tf_idf_svr_poly_2
119	119	svr_poly_2	4.64211e+07	6813.3	-0.046	1.1774	4763.15	tf_idf_svr_poly_2
120	120	svr_poly_2	4.64211e+07	6813.3	-0.046	1.1774	4763.15	tf_idf_svr_poly_2
121	121	svr_poly_2	4.64211e+07	6813.3	-0.046	1.1774	4763.15	tf_idf_svr_poly_2
122	122	svr_poly_2	4.64211e+07	6813.3	-0.046	1.1774	4763.15	tf_idf_svr_poly_2
123	123	svr_poly_2	4.64211e+07	6813.3	-0.046	1.1774	4763.15	tf_idf_svr_poly_2
124	124	svr_poly_2	4.64211e+07	6813.3	-0.046	1.1774	4763.15	tf_idf_svr_poly_2
125	125	svr_poly_2	4.64211e+07	6813.3	-0.046	1.1774	4763.15	tf_idf_svr_poly_2
126	126	svr_poly_2	4.64211e+07	6813.3	-0.046	1.1774	4763.15	tf_idf_svr_poly_2
127	127	svr_poly_2	4.64211e+07	6813.3	-0.046	1.1774	4763.15	tf_idf_svr_poly_2
128	128	svr_poly_2	4.64211e+07	6813.3	-0.046	1.1774	4763.15	tf_idf_svr_poly_2
129	129	svr_poly_2	4.64211e+07	6813.3	-0.046	1.1774	4763.15	tf_idf_svr_poly_2
130	130	svr_poly_2	4.64211e+07	6813.3	-0.046	1.1774	4763.15	tf_idf_svr_poly_2
131	131	svr_poly_2	4.64211e+07	6813.3	-0.046	1.1774	4763.15	tf_idf_svr_poly_2
132	132	svr_poly_2	4.64211e+07	6813.3	-0.046	1.1774	4763.15	tf_idf_svr_poly_2
133	133	svr_poly_2	4.64211e+07	6813.3	-0.046	1.1774	4763.15	tf_idf_svr_poly_2
134	134	svr_poly_2	4.64211e+07	6813.3	-0.046	1.1774	4763.15	tf_idf_svr_poly_2
135	135	svr_poly_2	4.64211e+07	6813.3	-0.046	1.1774	4763.15	tf_idf_svr_poly_2
136	136	svr_poly_2	4.64211e+07	6813.3	-0.046	1.1774	4763.15	tf_idf_svr_poly_2
137	137	svr_poly_2	4.64211e+07	6813.3	-0.046	1.1774	4763.15	tf_idf_svr_poly_2
138	138	svr_poly_2	4.64211e+07	6813.3	-0.046	1.1774	4763.15	tf_idf_svr_poly_2
139	139	svr_poly_2	4.64211e+07	6813.3	-0.046	1.1774	4763.15	tf_idf_svr_poly_2
140	140	svr_poly_2	4.64211e+07	6813.3	-0.046	1.1774	4763.15	tf_idf_svr_poly_2
141	141	svr_poly_2	4.64211e+07	6813.3	-0.046	1.1774	4763.15	tf_idf_svr_poly_2
142	142	svr_poly_2	4.64211e+07	6813.3	-0.046	1.1774	4763.15	tf_idf_svr_poly_2
143	143	svr_poly_2	4.64211e+07	6813.3	-0.046	1.1774	4763.15	tf_idf_svr_poly_2
144	144	svr_poly_2	4.64211e+07	6813.3	-0.046	1.1774	4763.15	tf_idf_svr_poly_2
145	145	svr_poly_2	4.64211e+07	6813.3	-0.046	1.1774	4763.15	tf_idf_svr_poly_2
146	146	svr_poly_2	4.64211e+07	6813.3	-0.046	1.1774	4763.15	tf_idf_svr_poly_2
147	147	svr_poly_2	4.64211e+07	6813.3	-0.046	1.1774	4763.15	tf_idf_svr_poly_2
148	148	svr_poly_2	4.64211e+07	6813.3	-0.046	1.1774	4763.15	tf_idf_svr_poly_2
149	149	svr_poly_2	4.64211e+07	6813.3	-0.046	1.1774	4763.15	tf_idf_svr_poly_2
150	150	svr_poly_3	4.63587e+07	6808.72	-0.0446	1.1771	4763.99	tf_idf_svr_poly_3
151	151	svr_poly_3	4.63587e+07	6808.72	-0.0446	1.1771	4763.99	tf_idf_svr_poly_3
152	152	svr_poly_3	4.63587e+07	6808.72	-0.0446	1.1771	4763.99	tf_idf_svr_poly_3
153	153	svr_poly_3	4.63587e+07	6808.72	-0.0446	1.1771	4763.99	tf_idf_svr_poly_3
154	154	svr_poly_3	4.63587e+07	6808.72	-0.0446	1.1771	4763.99	tf_idf_svr_poly_3
155	155	svr_poly_3	4.63587e+07	6808.72	-0.0446	1.1771	4763.99	tf_idf_svr_poly_3
156	156	svr_poly_3	4.63587e+07	6808.72	-0.0446	1.1771	4763.99	tf_idf_svr_poly_3
157	157	svr_poly_3	4.63587e+07	6808.72	-0.0446	1.1771	4763.99	tf_idf_svr_poly_3
158	158	svr_poly_3	4.63587e+07	6808.72	-0.0446	1.1771	4763.99	tf_idf_svr_poly_3
159	159	svr_poly_3	4.63587e+07	6808.72	-0.0446	1.1771	4763.99	tf_idf_svr_poly_3
160	160	svr_poly_3	4.63587e+07	6808.72	-0.0446	1.1771	4763.99	tf_idf_svr_poly_3
161	161	svr_poly_3	4.63587e+07	6808.72	-0.0446	1.1771	4763.99	tf_idf_svr_poly_3
162	162	svr_poly_3	4.63587e+07	6808.72	-0.0446	1.1771	4763.99	tf_idf_svr_poly_3
163	163	svr_poly_3	4.63587e+07	6808.72	-0.0446	1.1771	4763.99	tf_idf_svr_poly_3
164	164	svr_poly_3	4.63587e+07	6808.72	-0.0446	1.1771	4763.99	tf_idf_svr_poly_3
165	165	svr_poly_3	4.63587e+07	6808.72	-0.0446	1.1771	4763.99	tf_idf_svr_poly_3
166	166	svr_poly_3	4.63587e+07	6808.72	-0.0446	1.1771	4763.99	tf_idf_svr_poly_3
167	167	svr_poly_3	4.63587e+07	6808.72	-0.0446	1.1771	4763.99	tf_idf_svr_poly_3
168	168	svr_poly_3	4.63587e+07	6808.72	-0.0446	1.1771	4763.99	tf_idf_svr_poly_3
169	169	svr_poly_3	4.63587e+07	6808.72	-0.0446	1.1771	4763.99	tf_idf_svr_poly_3
170	170	svr_poly_3	4.63587e+07	6808.72	-0.0446	1.1771	4763.99	tf_idf_svr_poly_3
171	171	svr_poly_3	4.63587e+07	6808.72	-0.0446	1.1771	4763.99	tf_idf_svr_poly_3
172	172	svr_poly_3	4.63587e+07	6808.72	-0.0446	1.1771	4763.99	tf_idf_svr_poly_3
173	173	svr_poly_3	4.63587e+07	6808.72	-0.0446	1.1771	4763.99	tf_idf_svr_poly_3
174	174	svr_poly_3	4.63587e+07	6808.72	-0.0446	1.1771	4763.99	tf_idf_svr_poly_3
175	175	svr_poly_3	4.63587e+07	6808.72	-0.0446	1.1771	4763.99	tf_idf_svr_poly_3
176	176	svr_poly_3	4.63587e+07	6808.72	-0.0446	1.1771	4763.99	tf_idf_svr_poly_3
177	177	svr_poly_3	4.63587e+07	6808.72	-0.0446	1.1771	4763.99	tf_idf_svr_poly_3
178	178	svr_poly_3	4.63587e+07	6808.72	-0.0446	1.1771	4763.99	tf_idf_svr_poly_3
179	179	svr_poly_3	4.63587e+07	6808.72	-0.0446	1.1771	4763.99	tf_idf_svr_poly_3
180	180	svr_poly_3	4.63587e+07	6808.72	-0.0446	1.1771	4763.99	tf_idf_svr_poly_3
181	181	svr_poly_3	4.63587e+07	6808.72	-0.0446	1.1771	4763.99	tf_idf_svr_poly_3
182	182	svr_poly_3	4.63587e+07	6808.72	-0.0446	1.1771	4763.99	tf_idf_svr_poly_3
183	183	svr_poly_3	4.63587e+07	6808.72	-0.0446	1.1771	4763.99	tf_idf_svr_poly_3
184	184	svr_poly_3	4.63587e+07	6808.72	-0.0446	1.1771	4763.99	tf_idf_svr_poly_3
185	185	svr_poly_3	4.63587e+07	6808.72	-0.0446	1.1771	4763.99	tf_idf_svr_poly_3
186	186	svr_poly_3	4.63587e+07	6808.72	-0.0446	1.1771	4763.99	tf_idf_svr_poly_3
187	187	svr_poly_3	4.63587e+07	6808.72	-0.0446	1.1771	4763.99	tf_idf_svr_poly_3
188	188	svr_poly_3	4.63587e+07	6808.72	-0.0446	1.1771	4763.99	tf_idf_svr_poly_3
189	189	svr_poly_3	4.63587e+07	6808.72	-0.0446	1.1771	4763.99	tf_idf_svr_poly_3
190	190	svr_poly_3	4.63587e+07	6808.72	-0.0446	1.1771	4763.99	tf_idf_svr_poly_3
191	191	svr_poly_3	4.63587e+07	6808.72	-0.0446	1.1771	4763.99	tf_idf_svr_poly_3
192	192	svr_poly_3	4.63587e+07	6808.72	-0.0446	1.1771	4763.99	tf_idf_svr_poly_3
193	193	svr_poly_3	4.63587e+07	6808.72	-0.0446	1.1771	4763.99	tf_idf_svr_poly_3
194	194	svr_poly_3	4.63587e+07	6808.72	-0.0446	1.1771	4763.99	tf_idf_svr_poly_3
195	195	svr_poly_3	4.63587e+07	6808.72	-0.0446	1.1771	4763.99	tf_idf_svr_poly_3
196	196	svr_poly_3	4.63587e+07	6808.72	-0.0446	1.1771	4763.99	tf_idf_svr_poly_3
197	197	svr_poly_3	4.63587e+07	6808.72	-0.0446	1.1771	4763.99	tf_idf_svr_poly_3
198	198	svr_poly_3	4.63587e+07	6808.72	-0.0446	1.1771	4763.99	tf_idf_svr_poly_3
199	199	svr_poly_3	4.63587e+07	6808.72	-0.0446	1.1771	4763.99	tf_idf_svr_poly_3
200	200	svr_poly_4	4.62146e+07	6798.13	-0.0414	1.1766	4771.67	tf_idf_svr_poly_4
201	201	svr_poly_4	4.62146e+07	6798.13	-0.0414	1.1766	4771.67	tf_idf_svr_poly_4
202	202	svr_poly_4	4.62146e+07	6798.13	-0.0414	1.1766	4771.67	tf_idf_svr_poly_4
203	203	svr_poly_4	4.62146e+07	6798.13	-0.0414	1.1766	4771.67	tf_idf_svr_poly_4
204	204	svr_poly_4	4.62146e+07	6798.13	-0.0414	1.1766	4771.67	tf_idf_svr_poly_4
205	205	svr_poly_4	4.62146e+07	6798.13	-0.0414	1.1766	4771.67	tf_idf_svr_poly_4
206	206	svr_poly_4	4.62146e+07	6798.13	-0.0414	1.1766	4771.67	tf_idf_svr_poly_4
207	207	svr_poly_4	4.62146e+07	6798.13	-0.0414	1.1766	4771.67	tf_idf_svr_poly_4
208	208	svr_poly_4	4.62146e+07	6798.13	-0.0414	1.1766	4771.67	tf_idf_svr_poly_4
209	209	svr_poly_4	4.62146e+07	6798.13	-0.0414	1.1766	4771.67	tf_idf_svr_poly_4
210	210	svr_poly_4	4.62146e+07	6798.13	-0.0414	1.1766	4771.67	tf_idf_svr_poly_4
211	211	svr_poly_4	4.62146e+07	6798.13	-0.0414	1.1766	4771.67	tf_idf_svr_poly_4
212	212	svr_poly_4	4.62146e+07	6798.13	-0.0414	1.1766	4771.67	tf_idf_svr_poly_4
213	213	svr_poly_4	4.62146e+07	6798.13	-0.0414	1.1766	4771.67	tf_idf_svr_poly_4
214	214	svr_poly_4	4.62146e+07	6798.13	-0.0414	1.1766	4771.67	tf_idf_svr_poly_4
215	215	svr_poly_4	4.62146e+07	6798.13	-0.0414	1.1766	4771.67	tf_idf_svr_poly_4
216	216	svr_poly_4	4.62146e+07	6798.13	-0.0414	1.1766	4771.67	tf_idf_svr_poly_4
217	217	svr_poly_4	4.62146e+07	6798.13	-0.0414	1.1766	4771.67	tf_idf_svr_poly_4
218	218	svr_poly_4	4.62146e+07	6798.13	-0.0414	1.1766	4771.67	tf_idf_svr_poly_4
219	219	svr_poly_4	4.62146e+07	6798.13	-0.0414	1.1766	4771.67	tf_idf_svr_poly_4
220	220	svr_poly_4	4.62146e+07	6798.13	-0.0414	1.1766	4771.67	tf_idf_svr_poly_4
221	221	svr_poly_4	4.62146e+07	6798.13	-0.0414	1.1766	4771.67	tf_idf_svr_poly_4
222	222	svr_poly_4	4.62146e+07	6798.13	-0.0414	1.1766	4771.67	tf_idf_svr_poly_4
223	223	svr_poly_4	4.62146e+07	6798.13	-0.0414	1.1766	4771.67	tf_idf_svr_poly_4
224	224	svr_poly_4	4.62146e+07	6798.13	-0.0414	1.1766	4771.67	tf_idf_svr_poly_4
225	225	svr_poly_4	4.62146e+07	6798.13	-0.0414	1.1766	4771.67	tf_idf_svr_poly_4
226	226	svr_poly_4	4.62146e+07	6798.13	-0.0414	1.1766	4771.67	tf_idf_svr_poly_4
227	227	svr_poly_4	4.62146e+07	6798.13	-0.0414	1.1766	4771.67	tf_idf_svr_poly_4
228	228	svr_poly_4	4.62146e+07	6798.13	-0.0414	1.1766	4771.67	tf_idf_svr_poly_4
229	229	svr_poly_4	4.62146e+07	6798.13	-0.0414	1.1766	4771.67	tf_idf_svr_poly_4
230	230	svr_poly_4	4.62146e+07	6798.13	-0.0414	1.1766	4771.67	tf_idf_svr_poly_4
231	231	svr_poly_4	4.62146e+07	6798.13	-0.0414	1.1766	4771.67	tf_idf_svr_poly_4
232	232	svr_poly_4	4.62146e+07	6798.13	-0.0414	1.1766	4771.67	tf_idf_svr_poly_4
233	233	svr_poly_4	4.62146e+07	6798.13	-0.0414	1.1766	4771.67	tf_idf_svr_poly_4
234	234	svr_poly_4	4.62146e+07	6798.13	-0.0414	1.1766	4771.67	tf_idf_svr_poly_4
235	235	svr_poly_4	4.62146e+07	6798.13	-0.0414	1.1766	4771.67	tf_idf_svr_poly_4
236	236	svr_poly_4	4.62146e+07	6798.13	-0.0414	1.1766	4771.67	tf_idf_svr_poly_4
237	237	svr_poly_4	4.62146e+07	6798.13	-0.0414	1.1766	4771.67	tf_idf_svr_poly_4
238	238	svr_poly_4	4.62146e+07	6798.13	-0.0414	1.1766	4771.67	tf_idf_svr_poly_4
239	239	svr_poly_4	4.62146e+07	6798.13	-0.0414	1.1766	4771.67	tf_idf_svr_poly_4
240	240	svr_poly_4	4.62146e+07	6798.13	-0.0414	1.1766	4771.67	tf_idf_svr_poly_4
241	241	svr_poly_4	4.62146e+07	6798.13	-0.0414	1.1766	4771.67	tf_idf_svr_poly_4
242	242	svr_poly_4	4.62146e+07	6798.13	-0.0414	1.1766	4771.67	tf_idf_svr_poly_4
243	243	svr_poly_4	4.62146e+07	6798.13	-0.0414	1.1766	4771.67	tf_idf_svr_poly_4
244	244	svr_poly_4	4.62146e+07	6798.13	-0.0414	1.1766	4771.67	tf_idf_svr_poly_4
245	245	svr_poly_4	4.62146e+07	6798.13	-0.0414	1.1766	4771.67	tf_idf_svr_poly_4
246	246	svr_poly_4	4.62146e+07	6798.13	-0.0414	1.1766	4771.67	tf_idf_svr_poly_4
247	247	svr_poly_4	4.62146e+07	6798.13	-0.0414	1.1766	4771.67	tf_idf_svr_poly_4
248	248	svr_poly_4	4.62146e+07	6798.13	-0.0414	1.1766	4771.67	tf_idf_svr_poly_4
249	249	svr_poly_4	4.62146e+07	6798.13	-0.0414	1.1766	4771.67	tf_idf_svr_poly_4
250	250	svr_poly_10	9.9469e+07	9973.41	-1.2414	1.38	5412.7	tf_idf_svr_poly_10
251	251	svr_poly_10	9.9469e+07	9973.41	-1.2414	1.38	5412.7	tf_idf_svr_poly_10
252	252	svr_poly_10	9.9469e+07	9973.41	-1.2414	1.38	5412.7	tf_idf_svr_poly_10
253	253	svr_poly_10	9.9469e+07	9973.41	-1.2414	1.38	5412.7	tf_idf_svr_poly_10
254	254	svr_poly_10	9.9469e+07	9973.41	-1.2414	1.38	5412.7	tf_idf_svr_poly_10
255	255	svr_poly_10	9.9469e+07	9973.41	-1.2414	1.38	5412.7	tf_idf_svr_poly_10
256	256	svr_poly_10	9.9469e+07	9973.41	-1.2414	1.38	5412.7	tf_idf_svr_poly_10
257	257	svr_poly_10	9.9469e+07	9973.41	-1.2414	1.38	5412.7	tf_idf_svr_poly_10
258	258	svr_poly_10	9.9469e+07	9973.41	-1.2414	1.38	5412.7	tf_idf_svr_poly_10
259	259	svr_poly_10	9.9469e+07	9973.41	-1.2414	1.38	5412.7	tf_idf_svr_poly_10
260	260	svr_poly_10	9.9469e+07	9973.41	-1.2414	1.38	5412.7	tf_idf_svr_poly_10
261	261	svr_poly_10	9.9469e+07	9973.41	-1.2414	1.38	5412.7	tf_idf_svr_poly_10
262	262	svr_poly_10	9.9469e+07	9973.41	-1.2414	1.38	5412.7	tf_idf_svr_poly_10
263	263	svr_poly_10	9.9469e+07	9973.41	-1.2414	1.38	5412.7	tf_idf_svr_poly_10
264	264	svr_poly_10	9.9469e+07	9973.41	-1.2414	1.38	5412.7	tf_idf_svr_poly_10
265	265	svr_poly_10	9.9469e+07	9973.41	-1.2414	1.38	5412.7	tf_idf_svr_poly_10
266	266	svr_poly_10	9.9469e+07	9973.41	-1.2414	1.38	5412.7	tf_idf_svr_poly_10
267	267	svr_poly_10	9.9469e+07	9973.41	-1.2414	1.38	5412.7	tf_idf_svr_poly_10
268	268	svr_poly_10	9.9469e+07	9973.41	-1.2414	1.38	5412.7	tf_idf_svr_poly_10
269	269	svr_poly_10	9.9469e+07	9973.41	-1.2414	1.38	5412.7	tf_idf_svr_poly_10
270	270	svr_poly_10	9.9469e+07	9973.41	-1.2414	1.38	5412.7	tf_idf_svr_poly_10
271	271	svr_poly_10	9.9469e+07	9973.41	-1.2414	1.38	5412.7	tf_idf_svr_poly_10
272	272	svr_poly_10	9.9469e+07	9973.41	-1.2414	1.38	5412.7	tf_idf_svr_poly_10
273	273	svr_poly_10	9.9469e+07	9973.41	-1.2414	1.38	5412.7	tf_idf_svr_poly_10
274	274	svr_poly_10	9.9469e+07	9973.41	-1.2414	1.38	5412.7	tf_idf_svr_poly_10
275	275	svr_poly_10	9.9469e+07	9973.41	-1.2414	1.38	5412.7	tf_idf_svr_poly_10
276	276	svr_poly_10	9.9469e+07	9973.41	-1.2414	1.38	5412.7	tf_idf_svr_poly_10
277	277	svr_poly_10	9.9469e+07	9973.41	-1.2414	1.38	5412.7	tf_idf_svr_poly_10
278	278	svr_poly_10	9.9469e+07	9973.41	-1.2414	1.38	5412.7	tf_idf_svr_poly_10
279	279	svr_poly_10	9.9469e+07	9973.41	-1.2414	1.38	5412.7	tf_idf_svr_poly_10
280	280	svr_poly_10	9.9469e+07	9973.41	-1.2414	1.38	5412.7	tf_idf_svr_poly_10
281	281	svr_poly_10	9.9469e+07	9973.41	-1.2414	1.38	5412.7	tf_idf_svr_poly_10
282	282	svr_poly_10	9.9469e+07	9973.41	-1.2414	1.38	5412.7	tf_idf_svr_poly_10
283	283	svr_poly_10	9.9469e+07	9973.41	-1.2414	1.38	5412.7	tf_idf_svr_poly_10
284	284	svr_poly_10	9.9469e+07	9973.41	-1.2414	1.38	5412.7	tf_idf_svr_poly_10
285	285	svr_poly_10	9.9469e+07	9973.41	-1.2414	1.38	5412.7	tf_idf_svr_poly_10
286	286	svr_poly_10	9.9469e+07	9973.41	-1.2414	1.38	5412.7	tf_idf_svr_poly_10
287	287	svr_poly_10	9.9469e+07	9973.41	-1.2414	1.38	5412.7	tf_idf_svr_poly_10
288	288	svr_poly_10	9.9469e+07	9973.41	-1.2414	1.38	5412.7	tf_idf_svr_poly_10
289	289	svr_poly_10	9.9469e+07	9973.41	-1.2414	1.38	5412.7	tf_idf_svr_poly_10
290	290	svr_poly_10	9.9469e+07	9973.41	-1.2414	1.38	5412.7	tf_idf_svr_poly_10
291	291	svr_poly_10	9.9469e+07	9973.41	-1.2414	1.38	5412.7	tf_idf_svr_poly_10
292	292	svr_poly_10	9.9469e+07	9973.41	-1.2414	1.38	5412.7	tf_idf_svr_poly_10
293	293	svr_poly_10	9.9469e+07	9973.41	-1.2414	1.38	5412.7	tf_idf_svr_poly_10
294	294	svr_poly_10	9.9469e+07	9973.41	-1.2414	1.38	5412.7	tf_idf_svr_poly_10
295	295	svr_poly_10	9.9469e+07	9973.41	-1.2414	1.38	5412.7	tf_idf_svr_poly_10
296	296	svr_poly_10	9.9469e+07	9973.41	-1.2414	1.38	5412.7	tf_idf_svr_poly_10
297	297	svr_poly_10	9.9469e+07	9973.41	-1.2414	1.38	5412.7	tf_idf_svr_poly_10
298	298	svr_poly_10	9.9469e+07	9973.41	-1.2414	1.38	5412.7	tf_idf_svr_poly_10
299	299	svr_poly_10	9.9469e+07	9973.41	-1.2414	1.38	5412.7	tf_idf_svr_poly_10
300	300	svr_poly_15	1.21498e+11	348566	-2736.79	465.19	36626.3	tf_idf_svr_poly_15
301	301	svr_poly_15	1.21498e+11	348566	-2736.79	465.19	36626.3	tf_idf_svr_poly_15
302	302	svr_poly_15	1.21498e+11	348566	-2736.79	465.19	36626.3	tf_idf_svr_poly_15
303	303	svr_poly_15	1.21498e+11	348566	-2736.79	465.19	36626.3	tf_idf_svr_poly_15
304	304	svr_poly_15	1.21498e+11	348566	-2736.79	465.19	36626.3	tf_idf_svr_poly_15
305	305	svr_poly_15	1.21498e+11	348566	-2736.79	465.19	36626.3	tf_idf_svr_poly_15
306	306	svr_poly_15	1.21498e+11	348566	-2736.79	465.19	36626.3	tf_idf_svr_poly_15
307	307	svr_poly_15	1.21498e+11	348566	-2736.79	465.19	36626.3	tf_idf_svr_poly_15
308	308	svr_poly_15	1.21498e+11	348566	-2736.79	465.19	36626.3	tf_idf_svr_poly_15
309	309	svr_poly_15	1.21498e+11	348566	-2736.79	465.19	36626.3	tf_idf_svr_poly_15
310	310	svr_poly_15	1.21498e+11	348566	-2736.79	465.19	36626.3	tf_idf_svr_poly_15
311	311	svr_poly_15	1.21498e+11	348566	-2736.79	465.19	36626.3	tf_idf_svr_poly_15
312	312	svr_poly_15	1.21498e+11	348566	-2736.79	465.19	36626.3	tf_idf_svr_poly_15
313	313	svr_poly_15	1.21498e+11	348566	-2736.79	465.19	36626.3	tf_idf_svr_poly_15
314	314	svr_poly_15	1.21498e+11	348566	-2736.79	465.19	36626.3	tf_idf_svr_poly_15
315	315	svr_poly_15	1.21498e+11	348566	-2736.79	465.19	36626.3	tf_idf_svr_poly_15
316	316	svr_poly_15	1.21498e+11	348566	-2736.79	465.19	36626.3	tf_idf_svr_poly_15
317	317	svr_poly_15	1.21498e+11	348566	-2736.79	465.19	36626.3	tf_idf_svr_poly_15
318	318	svr_poly_15	1.21498e+11	348566	-2736.79	465.19	36626.3	tf_idf_svr_poly_15
319	319	svr_poly_15	1.21498e+11	348566	-2736.79	465.19	36626.3	tf_idf_svr_poly_15
320	320	svr_poly_15	1.21498e+11	348566	-2736.79	465.19	36626.3	tf_idf_svr_poly_15
321	321	svr_poly_15	1.21498e+11	348566	-2736.79	465.19	36626.3	tf_idf_svr_poly_15
322	322	svr_poly_15	1.21498e+11	348566	-2736.79	465.19	36626.3	tf_idf_svr_poly_15
323	323	svr_poly_15	1.21498e+11	348566	-2736.79	465.19	36626.3	tf_idf_svr_poly_15
324	324	svr_poly_15	1.21498e+11	348566	-2736.79	465.19	36626.3	tf_idf_svr_poly_15
325	325	svr_poly_15	1.21498e+11	348566	-2736.79	465.19	36626.3	tf_idf_svr_poly_15
326	326	svr_poly_15	1.21498e+11	348566	-2736.79	465.19	36626.3	tf_idf_svr_poly_15
327	327	svr_poly_15	1.21498e+11	348566	-2736.79	465.19	36626.3	tf_idf_svr_poly_15
328	328	svr_poly_15	1.21498e+11	348566	-2736.79	465.19	36626.3	tf_idf_svr_poly_15
329	329	svr_poly_15	1.21498e+11	348566	-2736.79	465.19	36626.3	tf_idf_svr_poly_15
330	330	svr_poly_15	1.21498e+11	348566	-2736.79	465.19	36626.3	tf_idf_svr_poly_15
331	331	svr_poly_15	1.21498e+11	348566	-2736.79	465.19	36626.3	tf_idf_svr_poly_15
332	332	svr_poly_15	1.21498e+11	348566	-2736.79	465.19	36626.3	tf_idf_svr_poly_15
333	333	svr_poly_15	1.21498e+11	348566	-2736.79	465.19	36626.3	tf_idf_svr_poly_15
334	334	svr_poly_15	1.21498e+11	348566	-2736.79	465.19	36626.3	tf_idf_svr_poly_15
335	335	svr_poly_15	1.21498e+11	348566	-2736.79	465.19	36626.3	tf_idf_svr_poly_15
336	336	svr_poly_15	1.21498e+11	348566	-2736.79	465.19	36626.3	tf_idf_svr_poly_15
337	337	svr_poly_15	1.21498e+11	348566	-2736.79	465.19	36626.3	tf_idf_svr_poly_15
338	338	svr_poly_15	1.21498e+11	348566	-2736.79	465.19	36626.3	tf_idf_svr_poly_15
339	339	svr_poly_15	1.21498e+11	348566	-2736.79	465.19	36626.3	tf_idf_svr_poly_15
340	340	svr_poly_15	1.21498e+11	348566	-2736.79	465.19	36626.3	tf_idf_svr_poly_15
341	341	svr_poly_15	1.21498e+11	348566	-2736.79	465.19	36626.3	tf_idf_svr_poly_15
342	342	svr_poly_15	1.21498e+11	348566	-2736.79	465.19	36626.3	tf_idf_svr_poly_15
343	343	svr_poly_15	1.21498e+11	348566	-2736.79	465.19	36626.3	tf_idf_svr_poly_15
344	344	svr_poly_15	1.21498e+11	348566	-2736.79	465.19	36626.3	tf_idf_svr_poly_15
345	345	svr_poly_15	1.21498e+11	348566	-2736.79	465.19	36626.3	tf_idf_svr_poly_15
346	346	svr_poly_15	1.21498e+11	348566	-2736.79	465.19	36626.3	tf_idf_svr_poly_15
347	347	svr_poly_15	1.21498e+11	348566	-2736.79	465.19	36626.3	tf_idf_svr_poly_15
348	348	svr_poly_15	1.21498e+11	348566	-2736.79	465.19	36626.3	tf_idf_svr_poly_15
349	349	svr_poly_15	1.21498e+11	348566	-2736.79	465.19	36626.3	tf_idf_svr_poly_15
350	350	svr_rbf	4.64786e+07	6817.52	-0.0473	1.1776	4763.51	tf_idf_svr_rbf
351	351	svr_rbf	4.64786e+07	6817.52	-0.0473	1.1776	4763.51	tf_idf_svr_rbf
352	352	svr_rbf	4.64786e+07	6817.52	-0.0473	1.1776	4763.51	tf_idf_svr_rbf
353	353	svr_rbf	4.64786e+07	6817.52	-0.0473	1.1776	4763.51	tf_idf_svr_rbf
354	354	svr_rbf	4.64786e+07	6817.52	-0.0473	1.1776	4763.51	tf_idf_svr_rbf
355	355	svr_rbf	4.64786e+07	6817.52	-0.0473	1.1776	4763.51	tf_idf_svr_rbf
356	356	svr_rbf	4.64786e+07	6817.52	-0.0473	1.1776	4763.51	tf_idf_svr_rbf
357	357	svr_rbf	4.64786e+07	6817.52	-0.0473	1.1776	4763.51	tf_idf_svr_rbf
358	358	svr_rbf	4.64786e+07	6817.52	-0.0473	1.1776	4763.51	tf_idf_svr_rbf
359	359	svr_rbf	4.64786e+07	6817.52	-0.0473	1.1776	4763.51	tf_idf_svr_rbf
360	360	svr_rbf	4.64786e+07	6817.52	-0.0473	1.1776	4763.51	tf_idf_svr_rbf
361	361	svr_rbf	4.64786e+07	6817.52	-0.0473	1.1776	4763.51	tf_idf_svr_rbf
362	362	svr_rbf	4.64786e+07	6817.52	-0.0473	1.1776	4763.51	tf_idf_svr_rbf
363	363	svr_rbf	4.64786e+07	6817.52	-0.0473	1.1776	4763.51	tf_idf_svr_rbf
364	364	svr_rbf	4.64786e+07	6817.52	-0.0473	1.1776	4763.51	tf_idf_svr_rbf
365	365	svr_rbf	4.64786e+07	6817.52	-0.0473	1.1776	4763.51	tf_idf_svr_rbf
366	366	svr_rbf	4.64786e+07	6817.52	-0.0473	1.1776	4763.51	tf_idf_svr_rbf
367	367	svr_rbf	4.64786e+07	6817.52	-0.0473	1.1776	4763.51	tf_idf_svr_rbf
368	368	svr_rbf	4.64786e+07	6817.52	-0.0473	1.1776	4763.51	tf_idf_svr_rbf
369	369	svr_rbf	4.64786e+07	6817.52	-0.0473	1.1776	4763.51	tf_idf_svr_rbf
370	370	svr_rbf	4.64786e+07	6817.52	-0.0473	1.1776	4763.51	tf_idf_svr_rbf
371	371	svr_rbf	4.64786e+07	6817.52	-0.0473	1.1776	4763.51	tf_idf_svr_rbf
372	372	svr_rbf	4.64786e+07	6817.52	-0.0473	1.1776	4763.51	tf_idf_svr_rbf
373	373	svr_rbf	4.64786e+07	6817.52	-0.0473	1.1776	4763.51	tf_idf_svr_rbf
374	374	svr_rbf	4.64786e+07	6817.52	-0.0473	1.1776	4763.51	tf_idf_svr_rbf
375	375	svr_rbf	4.64786e+07	6817.52	-0.0473	1.1776	4763.51	tf_idf_svr_rbf
376	376	svr_rbf	4.64786e+07	6817.52	-0.0473	1.1776	4763.51	tf_idf_svr_rbf
377	377	svr_rbf	4.64786e+07	6817.52	-0.0473	1.1776	4763.51	tf_idf_svr_rbf
378	378	svr_rbf	4.64786e+07	6817.52	-0.0473	1.1776	4763.51	tf_idf_svr_rbf
379	379	svr_rbf	4.64786e+07	6817.52	-0.0473	1.1776	4763.51	tf_idf_svr_rbf
380	380	svr_rbf	4.64786e+07	6817.52	-0.0473	1.1776	4763.51	tf_idf_svr_rbf
381	381	svr_rbf	4.64786e+07	6817.52	-0.0473	1.1776	4763.51	tf_idf_svr_rbf
382	382	svr_rbf	4.64786e+07	6817.52	-0.0473	1.1776	4763.51	tf_idf_svr_rbf
383	383	svr_rbf	4.64786e+07	6817.52	-0.0473	1.1776	4763.51	tf_idf_svr_rbf
384	384	svr_rbf	4.64786e+07	6817.52	-0.0473	1.1776	4763.51	tf_idf_svr_rbf
385	385	svr_rbf	4.64786e+07	6817.52	-0.0473	1.1776	4763.51	tf_idf_svr_rbf
386	386	svr_rbf	4.64786e+07	6817.52	-0.0473	1.1776	4763.51	tf_idf_svr_rbf
387	387	svr_rbf	4.64786e+07	6817.52	-0.0473	1.1776	4763.51	tf_idf_svr_rbf
388	388	svr_rbf	4.64786e+07	6817.52	-0.0473	1.1776	4763.51	tf_idf_svr_rbf
389	389	svr_rbf	4.64786e+07	6817.52	-0.0473	1.1776	4763.51	tf_idf_svr_rbf
390	390	svr_rbf	4.64786e+07	6817.52	-0.0473	1.1776	4763.51	tf_idf_svr_rbf
391	391	svr_rbf	4.64786e+07	6817.52	-0.0473	1.1776	4763.51	tf_idf_svr_rbf
392	392	svr_rbf	4.64786e+07	6817.52	-0.0473	1.1776	4763.51	tf_idf_svr_rbf
393	393	svr_rbf	4.64786e+07	6817.52	-0.0473	1.1776	4763.51	tf_idf_svr_rbf
394	394	svr_rbf	4.64786e+07	6817.52	-0.0473	1.1776	4763.51	tf_idf_svr_rbf
395	395	svr_rbf	4.64786e+07	6817.52	-0.0473	1.1776	4763.51	tf_idf_svr_rbf
396	396	svr_rbf	4.64786e+07	6817.52	-0.0473	1.1776	4763.51	tf_idf_svr_rbf
397	397	svr_rbf	4.64786e+07	6817.52	-0.0473	1.1776	4763.51	tf_idf_svr_rbf
398	398	svr_rbf	4.64786e+07	6817.52	-0.0473	1.1776	4763.51	tf_idf_svr_rbf
399	399	svr_rbf	4.64786e+07	6817.52	-0.0473	1.1776	4763.51	tf_idf_svr_rbf
400	400	svr_sigmoid	4.64936e+07	6818.62	-0.0477	1.1776	4763.83	tf_idf_svr_sigmoid
401	401	svr_sigmoid	4.64936e+07	6818.62	-0.0477	1.1776	4763.83	tf_idf_svr_sigmoid
402	402	svr_sigmoid	4.64936e+07	6818.62	-0.0477	1.1776	4763.83	tf_idf_svr_sigmoid
403	403	svr_sigmoid	4.64936e+07	6818.62	-0.0477	1.1776	4763.83	tf_idf_svr_sigmoid
404	404	svr_sigmoid	4.64936e+07	6818.62	-0.0477	1.1776	4763.83	tf_idf_svr_sigmoid
405	405	svr_sigmoid	4.64936e+07	6818.62	-0.0477	1.1776	4763.83	tf_idf_svr_sigmoid
406	406	svr_sigmoid	4.64936e+07	6818.62	-0.0477	1.1776	4763.83	tf_idf_svr_sigmoid
407	407	svr_sigmoid	4.64936e+07	6818.62	-0.0477	1.1776	4763.83	tf_idf_svr_sigmoid
408	408	svr_sigmoid	4.64936e+07	6818.62	-0.0477	1.1776	4763.83	tf_idf_svr_sigmoid
409	409	svr_sigmoid	4.64936e+07	6818.62	-0.0477	1.1776	4763.83	tf_idf_svr_sigmoid
410	410	svr_sigmoid	4.64936e+07	6818.62	-0.0477	1.1776	4763.83	tf_idf_svr_sigmoid
411	411	svr_sigmoid	4.64936e+07	6818.62	-0.0477	1.1776	4763.83	tf_idf_svr_sigmoid
412	412	svr_sigmoid	4.64936e+07	6818.62	-0.0477	1.1776	4763.83	tf_idf_svr_sigmoid
413	413	svr_sigmoid	4.64936e+07	6818.62	-0.0477	1.1776	4763.83	tf_idf_svr_sigmoid
414	414	svr_sigmoid	4.64936e+07	6818.62	-0.0477	1.1776	4763.83	tf_idf_svr_sigmoid
415	415	svr_sigmoid	4.64936e+07	6818.62	-0.0477	1.1776	4763.83	tf_idf_svr_sigmoid
416	416	svr_sigmoid	4.64936e+07	6818.62	-0.0477	1.1776	4763.83	tf_idf_svr_sigmoid
417	417	svr_sigmoid	4.64936e+07	6818.62	-0.0477	1.1776	4763.83	tf_idf_svr_sigmoid
418	418	svr_sigmoid	4.64936e+07	6818.62	-0.0477	1.1776	4763.83	tf_idf_svr_sigmoid
419	419	svr_sigmoid	4.64936e+07	6818.62	-0.0477	1.1776	4763.83	tf_idf_svr_sigmoid
420	420	svr_sigmoid	4.64936e+07	6818.62	-0.0477	1.1776	4763.83	tf_idf_svr_sigmoid
421	421	svr_sigmoid	4.64936e+07	6818.62	-0.0477	1.1776	4763.83	tf_idf_svr_sigmoid
422	422	svr_sigmoid	4.64936e+07	6818.62	-0.0477	1.1776	4763.83	tf_idf_svr_sigmoid
423	423	svr_sigmoid	4.64936e+07	6818.62	-0.0477	1.1776	4763.83	tf_idf_svr_sigmoid
424	424	svr_sigmoid	4.64936e+07	6818.62	-0.0477	1.1776	4763.83	tf_idf_svr_sigmoid
425	425	svr_sigmoid	4.64936e+07	6818.62	-0.0477	1.1776	4763.83	tf_idf_svr_sigmoid
426	426	svr_sigmoid	4.64936e+07	6818.62	-0.0477	1.1776	4763.83	tf_idf_svr_sigmoid
427	427	svr_sigmoid	4.64936e+07	6818.62	-0.0477	1.1776	4763.83	tf_idf_svr_sigmoid
428	428	svr_sigmoid	4.64936e+07	6818.62	-0.0477	1.1776	4763.83	tf_idf_svr_sigmoid
429	429	svr_sigmoid	4.64936e+07	6818.62	-0.0477	1.1776	4763.83	tf_idf_svr_sigmoid
430	430	svr_sigmoid	4.64936e+07	6818.62	-0.0477	1.1776	4763.83	tf_idf_svr_sigmoid
431	431	svr_sigmoid	4.64936e+07	6818.62	-0.0477	1.1776	4763.83	tf_idf_svr_sigmoid
432	432	svr_sigmoid	4.64936e+07	6818.62	-0.0477	1.1776	4763.83	tf_idf_svr_sigmoid
433	433	svr_sigmoid	4.64936e+07	6818.62	-0.0477	1.1776	4763.83	tf_idf_svr_sigmoid
434	434	svr_sigmoid	4.64936e+07	6818.62	-0.0477	1.1776	4763.83	tf_idf_svr_sigmoid
435	435	svr_sigmoid	4.64936e+07	6818.62	-0.0477	1.1776	4763.83	tf_idf_svr_sigmoid
436	436	svr_sigmoid	4.64936e+07	6818.62	-0.0477	1.1776	4763.83	tf_idf_svr_sigmoid
437	437	svr_sigmoid	4.64936e+07	6818.62	-0.0477	1.1776	4763.83	tf_idf_svr_sigmoid
438	438	svr_sigmoid	4.64936e+07	6818.62	-0.0477	1.1776	4763.83	tf_idf_svr_sigmoid
439	439	svr_sigmoid	4.64936e+07	6818.62	-0.0477	1.1776	4763.83	tf_idf_svr_sigmoid
440	440	svr_sigmoid	4.64936e+07	6818.62	-0.0477	1.1776	4763.83	tf_idf_svr_sigmoid
441	441	svr_sigmoid	4.64936e+07	6818.62	-0.0477	1.1776	4763.83	tf_idf_svr_sigmoid
442	442	svr_sigmoid	4.64936e+07	6818.62	-0.0477	1.1776	4763.83	tf_idf_svr_sigmoid
443	443	svr_sigmoid	4.64936e+07	6818.62	-0.0477	1.1776	4763.83	tf_idf_svr_sigmoid
444	444	svr_sigmoid	4.64936e+07	6818.62	-0.0477	1.1776	4763.83	tf_idf_svr_sigmoid
445	445	svr_sigmoid	4.64936e+07	6818.62	-0.0477	1.1776	4763.83	tf_idf_svr_sigmoid
446	446	svr_sigmoid	4.64936e+07	6818.62	-0.0477	1.1776	4763.83	tf_idf_svr_sigmoid
447	447	svr_sigmoid	4.64936e+07	6818.62	-0.0477	1.1776	4763.83	tf_idf_svr_sigmoid
448	448	svr_sigmoid	4.64936e+07	6818.62	-0.0477	1.1776	4763.83	tf_idf_svr_sigmoid
449	449	svr_sigmoid	4.64936e+07	6818.62	-0.0477	1.1776	4763.83	tf_idf_svr_sigmoid
450	450	random_forest_10	2.94296e+07	5424.91	0.3368	1.1124	3848.2	tf_idf_random_forest_10
451	451	random_forest_10	2.88989e+07	5375.77	0.3488	1.1104	3601.8	tf_idf_random_forest_10
452	452	random_forest_10	3.2483e+07	5699.39	0.268	1.1241	3793.07	tf_idf_random_forest_10
453	453	random_forest_10	3.04588e+07	5518.95	0.3137	1.1164	3652.96	tf_idf_random_forest_10
454	454	random_forest_10	3.12916e+07	5593.89	0.2949	1.1196	3770.34	tf_idf_random_forest_10
455	455	random_forest_10	3.14957e+07	5612.1	0.2903	1.1203	3746.6	tf_idf_random_forest_10
456	456	random_forest_10	3.5107e+07	5925.12	0.2089	1.1341	4084.75	tf_idf_random_forest_10
457	457	random_forest_10	3.04781e+07	5520.69	0.3132	1.1164	3774.68	tf_idf_random_forest_10
458	458	random_forest_10	3.57035e+07	5975.24	0.1955	1.1364	3871.11	tf_idf_random_forest_10
459	459	random_forest_10	3.40875e+07	5838.45	0.2319	1.1302	3885.18	tf_idf_random_forest_10
460	460	random_forest_10	3.5927e+07	5993.91	0.1904	1.1373	4034.16	tf_idf_random_forest_10
461	461	random_forest_10	3.28795e+07	5734.06	0.2591	1.1256	3820.78	tf_idf_random_forest_10
462	462	random_forest_10	3.2712e+07	5719.44	0.2629	1.125	3850.11	tf_idf_random_forest_10
463	463	random_forest_10	3.54959e+07	5957.84	0.2001	1.1356	4120.74	tf_idf_random_forest_10
464	464	random_forest_10	3.14061e+07	5604.11	0.2923	1.12	3748.82	tf_idf_random_forest_10
465	465	random_forest_10	3.16942e+07	5629.76	0.2858	1.1211	3751.9	tf_idf_random_forest_10
466	466	random_forest_10	3.50068e+07	5916.65	0.2112	1.1337	4099.2	tf_idf_random_forest_10
467	467	random_forest_10	3.33479e+07	5774.76	0.2486	1.1274	3991.97	tf_idf_random_forest_10
468	468	random_forest_10	3.2069e+07	5662.95	0.2774	1.1225	3907.12	tf_idf_random_forest_10
469	469	random_forest_10	3.28275e+07	5729.53	0.2603	1.1254	3922.07	tf_idf_random_forest_10
470	470	random_forest_10	2.95379e+07	5434.88	0.3344	1.1129	3870.47	tf_idf_random_forest_10
471	471	random_forest_10	3.12188e+07	5587.38	0.2965	1.1193	3812.28	tf_idf_random_forest_10
472	472	random_forest_10	3.03909e+07	5512.79	0.3152	1.1161	3723	tf_idf_random_forest_10
473	473	random_forest_10	3.06404e+07	5535.38	0.3096	1.1171	3785.9	tf_idf_random_forest_10
474	474	random_forest_10	3.49058e+07	5908.11	0.2134	1.1334	3905.21	tf_idf_random_forest_10
475	475	random_forest_10	2.83348e+07	5323.04	0.3615	1.1083	3732.06	tf_idf_random_forest_10
476	476	random_forest_10	3.131e+07	5595.53	0.2945	1.1196	3732.85	tf_idf_random_forest_10
477	477	random_forest_10	3.40925e+07	5838.88	0.2318	1.1303	3851.47	tf_idf_random_forest_10
478	478	random_forest_10	3.10604e+07	5573.18	0.3001	1.1187	3698.79	tf_idf_random_forest_10
479	479	random_forest_10	3.21285e+07	5668.2	0.276	1.1227	3806.87	tf_idf_random_forest_10
480	480	random_forest_10	3.23881e+07	5691.05	0.2702	1.1237	3827.2	tf_idf_random_forest_10
481	481	random_forest_10	3.12937e+07	5594.08	0.2948	1.1196	3756.65	tf_idf_random_forest_10
482	482	random_forest_10	2.79712e+07	5288.79	0.3697	1.1069	3564.69	tf_idf_random_forest_10
483	483	random_forest_10	3.69543e+07	6079.01	0.1673	1.1412	4081.27	tf_idf_random_forest_10
484	484	random_forest_10	3.08665e+07	5555.76	0.3045	1.1179	3820.55	tf_idf_random_forest_10
485	485	random_forest_10	3.15885e+07	5620.37	0.2882	1.1207	3630.25	tf_idf_random_forest_10
486	486	random_forest_10	3.04951e+07	5522.24	0.3128	1.1165	3761.41	tf_idf_random_forest_10
487	487	random_forest_10	3.18564e+07	5644.15	0.2822	1.1217	3885.57	tf_idf_random_forest_10
488	488	random_forest_10	3.19527e+07	5652.68	0.28	1.1221	3850.29	tf_idf_random_forest_10
489	489	random_forest_10	3.04039e+07	5513.98	0.3149	1.1162	3627.07	tf_idf_random_forest_10
490	490	random_forest_10	3.33321e+07	5773.4	0.2489	1.1273	3847.5	tf_idf_random_forest_10
491	491	random_forest_10	3.24295e+07	5694.69	0.2692	1.1239	3847.83	tf_idf_random_forest_10
492	492	random_forest_10	3.61636e+07	6013.62	0.1851	1.1382	4083.52	tf_idf_random_forest_10
493	493	random_forest_10	3.14352e+07	5606.71	0.2917	1.1201	3785.82	tf_idf_random_forest_10
494	494	random_forest_10	3.15202e+07	5614.29	0.2897	1.1204	3875.27	tf_idf_random_forest_10
495	495	random_forest_10	3.17104e+07	5631.2	0.2854	1.1212	3750.78	tf_idf_random_forest_10
496	496	random_forest_10	3.06194e+07	5533.48	0.31	1.117	3659.59	tf_idf_random_forest_10
497	497	random_forest_10	3.45599e+07	5878.76	0.2212	1.132	3732.39	tf_idf_random_forest_10
498	498	random_forest_10	3.45733e+07	5879.91	0.2209	1.1321	4070.31	tf_idf_random_forest_10
499	499	random_forest_10	3.25966e+07	5709.34	0.2655	1.1245	4023.8	tf_idf_random_forest_10
500	500	random_forest_50	3.11046e+07	5577.15	0.2991	1.1188	3814.6	tf_idf_random_forest_50
501	501	random_forest_50	2.95231e+07	5433.52	0.3347	1.1128	3624.56	tf_idf_random_forest_50
502	502	random_forest_50	3.06704e+07	5538.09	0.3089	1.1172	3695.98	tf_idf_random_forest_50
503	503	random_forest_50	2.95523e+07	5436.2	0.3341	1.1129	3708.03	tf_idf_random_forest_50
504	504	random_forest_50	3.00295e+07	5479.92	0.3233	1.1147	3701.04	tf_idf_random_forest_50
505	505	random_forest_50	2.88759e+07	5373.63	0.3493	1.1103	3590.02	tf_idf_random_forest_50
506	506	random_forest_50	30858800	5555.07	0.3046	1.1179	3757.04	tf_idf_random_forest_50
507	507	random_forest_50	2.88426e+07	5370.53	0.3501	1.1102	3605.41	tf_idf_random_forest_50
508	508	random_forest_50	3.17347e+07	5633.36	0.2849	1.1212	3712.76	tf_idf_random_forest_50
509	509	random_forest_50	3.03489e+07	5508.99	0.3161	1.1159	3676.48	tf_idf_random_forest_50
510	510	random_forest_50	2.87801e+07	5364.71	0.3515	1.11	3604.86	tf_idf_random_forest_50
511	511	random_forest_50	2.90592e+07	5390.66	0.3452	1.111	3593.34	tf_idf_random_forest_50
512	512	random_forest_50	2.92522e+07	5408.53	0.3408	1.1118	3680.63	tf_idf_random_forest_50
513	513	random_forest_50	2.84483e+07	5333.69	0.359	1.1087	3637.54	tf_idf_random_forest_50
514	514	random_forest_50	3.13942e+07	5603.05	0.2926	1.1199	3784.71	tf_idf_random_forest_50
515	515	random_forest_50	2.95136e+07	5432.64	0.335	1.1128	3705.18	tf_idf_random_forest_50
516	516	random_forest_50	3.10947e+07	5576.26	0.2993	1.1188	3709.04	tf_idf_random_forest_50
517	517	random_forest_50	2.9827e+07	5461.41	0.3279	1.114	3667.03	tf_idf_random_forest_50
518	518	random_forest_50	2.94059e+07	5422.72	0.3374	1.1123	3670.83	tf_idf_random_forest_50
519	519	random_forest_50	3.05795e+07	5529.88	0.3109	1.1168	3688.22	tf_idf_random_forest_50
520	520	random_forest_50	2.9815e+07	5460.31	0.3282	1.1139	3705.21	tf_idf_random_forest_50
521	521	random_forest_50	3.04821e+07	5521.06	0.3131	1.1165	3717.77	tf_idf_random_forest_50
522	522	random_forest_50	3.0331e+07	5507.36	0.3165	1.1159	3665.73	tf_idf_random_forest_50
523	523	random_forest_50	3.02668e+07	5501.53	0.318	1.1156	3775.02	tf_idf_random_forest_50
524	524	random_forest_50	3.035e+07	5509.08	0.3161	1.116	3638.59	tf_idf_random_forest_50
525	525	random_forest_50	3.02715e+07	5501.95	0.3179	1.1157	3658.99	tf_idf_random_forest_50
526	526	random_forest_50	2.88133e+07	5367.8	0.3507	1.1101	3569.28	tf_idf_random_forest_50
527	527	random_forest_50	3.07437e+07	5544.7	0.3072	1.1175	3758.38	tf_idf_random_forest_50
528	528	random_forest_50	2.87607e+07	5362.9	0.3519	1.1099	3628.2	tf_idf_random_forest_50
529	529	random_forest_50	2.97439e+07	5453.8	0.3298	1.1136	3677.58	tf_idf_random_forest_50
530	530	random_forest_50	3.128e+07	5592.86	0.2951	1.1195	3735.55	tf_idf_random_forest_50
531	531	random_forest_50	3.09953e+07	5567.34	0.3016	1.1184	3731.85	tf_idf_random_forest_50
532	532	random_forest_50	3.04367e+07	5516.94	0.3142	1.1163	3654.12	tf_idf_random_forest_50
533	533	random_forest_50	3.04963e+07	5522.35	0.3128	1.1165	3734.72	tf_idf_random_forest_50
534	534	random_forest_50	3.12692e+07	5591.89	0.2954	1.1195	3724.11	tf_idf_random_forest_50
535	535	random_forest_50	3.06508e+07	5536.32	0.3093	1.1171	3751.33	tf_idf_random_forest_50
536	536	random_forest_50	3.09481e+07	5563.11	0.3026	1.1182	3709.27	tf_idf_random_forest_50
537	537	random_forest_50	3.12953e+07	5594.22	0.2948	1.1196	3679.42	tf_idf_random_forest_50
538	538	random_forest_50	2.96549e+07	5445.63	0.3318	1.1133	3717.35	tf_idf_random_forest_50
539	539	random_forest_50	2.94144e+07	5423.5	0.3372	1.1124	3735.76	tf_idf_random_forest_50
540	540	random_forest_50	3.03276e+07	5507.05	0.3166	1.1159	3700.26	tf_idf_random_forest_50
541	541	random_forest_50	3.00614e+07	5482.82	0.3226	1.1149	3722	tf_idf_random_forest_50
542	542	random_forest_50	2.92161e+07	5405.19	0.3417	1.1116	3641.72	tf_idf_random_forest_50
543	543	random_forest_50	3.01576e+07	5491.6	0.3204	1.1152	3777.29	tf_idf_random_forest_50
544	544	random_forest_50	2.8775e+07	5364.23	0.3516	1.1099	3649.9	tf_idf_random_forest_50
545	545	random_forest_50	3.01687e+07	5492.6	0.3202	1.1153	3672.26	tf_idf_random_forest_50
546	546	random_forest_50	3.01471e+07	5490.64	0.3207	1.1152	3721.32	tf_idf_random_forest_50
547	547	random_forest_50	2.95037e+07	5431.73	0.3352	1.1127	3603.75	tf_idf_random_forest_50
548	548	random_forest_50	3.01674e+07	5492.48	0.3202	1.1153	3668.67	tf_idf_random_forest_50
549	549	random_forest_50	3.00592e+07	5482.63	0.3227	1.1148	3738.71	tf_idf_random_forest_50
550	550	random_forest_100	2.94615e+07	5427.85	0.3361	1.1126	3685.08	tf_idf_random_forest_100
551	551	random_forest_100	3.08444e+07	5553.78	0.305	1.1178	3715.41	tf_idf_random_forest_100
552	552	random_forest_100	3.05224e+07	5524.71	0.3122	1.1166	3713.71	tf_idf_random_forest_100
553	553	random_forest_100	3.0279e+07	5502.64	0.3177	1.1157	3699.18	tf_idf_random_forest_100
554	554	random_forest_100	2.99846e+07	5475.82	0.3243	1.1146	3617.89	tf_idf_random_forest_100
555	555	random_forest_100	3.07576e+07	5545.95	0.3069	1.1175	3725.32	tf_idf_random_forest_100
556	556	random_forest_100	2.96864e+07	5448.52	0.3311	1.1134	3666.77	tf_idf_random_forest_100
557	557	random_forest_100	2.92537e+07	5408.67	0.3408	1.1118	3648.56	tf_idf_random_forest_100
558	558	random_forest_100	2.93931e+07	5421.54	0.3377	1.1123	3678.74	tf_idf_random_forest_100
559	559	random_forest_100	3.07987e+07	5549.66	0.306	1.1177	3743.12	tf_idf_random_forest_100
560	560	random_forest_100	3.03095e+07	5505.41	0.317	1.1158	3688.94	tf_idf_random_forest_100
561	561	random_forest_100	2.95686e+07	5437.7	0.3337	1.113	3616.19	tf_idf_random_forest_100
562	562	random_forest_100	2.95097e+07	5432.28	0.335	1.1127	3669.26	tf_idf_random_forest_100
563	563	random_forest_100	3.10676e+07	5573.83	0.2999	1.1187	3765.26	tf_idf_random_forest_100
564	564	random_forest_100	2.96862e+07	5448.51	0.3311	1.1134	3735.26	tf_idf_random_forest_100
565	565	random_forest_100	3.04779e+07	5520.68	0.3132	1.1164	3708.96	tf_idf_random_forest_100
566	566	random_forest_100	3.03681e+07	5510.72	0.3157	1.116	3700.68	tf_idf_random_forest_100
567	567	random_forest_100	2.94697e+07	5428.6	0.3359	1.1126	3659.68	tf_idf_random_forest_100
568	568	random_forest_100	3.04314e+07	5516.47	0.3143	1.1163	3721.18	tf_idf_random_forest_100
569	569	random_forest_100	3.028e+07	5502.73	0.3177	1.1157	3664.25	tf_idf_random_forest_100
570	570	random_forest_100	2.93565e+07	5418.16	0.3385	1.1122	3643.77	tf_idf_random_forest_100
571	571	random_forest_100	2.89084e+07	5376.65	0.3486	1.1104	3657.46	tf_idf_random_forest_100
572	572	random_forest_100	2.88105e+07	5367.54	0.3508	1.1101	3677.32	tf_idf_random_forest_100
573	573	random_forest_100	3.04484e+07	5518.01	0.3139	1.1163	3725.43	tf_idf_random_forest_100
574	574	random_forest_100	2.92186e+07	5405.42	0.3416	1.1116	3650.94	tf_idf_random_forest_100
575	575	random_forest_100	2.99304e+07	5470.87	0.3256	1.1144	3684.87	tf_idf_random_forest_100
576	576	random_forest_100	2.94335e+07	5425.26	0.3368	1.1125	3621.15	tf_idf_random_forest_100
577	577	random_forest_100	3.10968e+07	5576.45	0.2993	1.1188	3756.74	tf_idf_random_forest_100
578	578	random_forest_100	3.0673e+07	5538.32	0.3088	1.1172	3710.76	tf_idf_random_forest_100
579	579	random_forest_100	2.97023e+07	5449.98	0.3307	1.1135	3686.44	tf_idf_random_forest_100
580	580	random_forest_100	3.02547e+07	5500.42	0.3183	1.1156	3684.56	tf_idf_random_forest_100
581	581	random_forest_100	2.95235e+07	5433.55	0.3347	1.1128	3666.34	tf_idf_random_forest_100
582	582	random_forest_100	2.95657e+07	5437.43	0.3338	1.113	3649.66	tf_idf_random_forest_100
583	583	random_forest_100	2.99256e+07	5470.43	0.3257	1.1143	3690.45	tf_idf_random_forest_100
584	584	random_forest_100	2.97682e+07	5456.02	0.3292	1.1137	3687.72	tf_idf_random_forest_100
585	585	random_forest_100	3.0161e+07	5491.91	0.3204	1.1152	3672.92	tf_idf_random_forest_100
586	586	random_forest_100	3.0445e+07	5517.7	0.314	1.1163	3666.23	tf_idf_random_forest_100
587	587	random_forest_100	3.01123e+07	5487.47	0.3215	1.115	3650.41	tf_idf_random_forest_100
588	588	random_forest_100	2.97206e+07	5451.66	0.3303	1.1135	3701.83	tf_idf_random_forest_100
589	589	random_forest_100	2.90723e+07	5391.88	0.3449	1.1111	3705.23	tf_idf_random_forest_100
590	590	random_forest_100	2.9979e+07	5475.3	0.3245	1.1145	3701.79	tf_idf_random_forest_100
591	591	random_forest_100	2.99516e+07	5472.8	0.3251	1.1144	3672.06	tf_idf_random_forest_100
592	592	random_forest_100	2.85807e+07	5346.1	0.356	1.1092	3627.63	tf_idf_random_forest_100
593	593	random_forest_100	2.99531e+07	5472.94	0.325	1.1144	3703.51	tf_idf_random_forest_100
594	594	random_forest_100	2.916e+07	5400	0.3429	1.1114	3566.87	tf_idf_random_forest_100
595	595	random_forest_100	3.04793e+07	5520.81	0.3132	1.1164	3718.32	tf_idf_random_forest_100
596	596	random_forest_100	2.98172e+07	5460.51	0.3281	1.1139	3658.12	tf_idf_random_forest_100
597	597	random_forest_100	2.9371e+07	5419.5	0.3382	1.1122	3673.82	tf_idf_random_forest_100
598	598	random_forest_100	3.02934e+07	5503.95	0.3174	1.1157	3718.93	tf_idf_random_forest_100
599	599	random_forest_100	3.05022e+07	5522.88	0.3127	1.1165	3683.38	tf_idf_random_forest_100
600	600	random_forest_1000	2.98998e+07	5468.08	0.3262	1.1142	3669.53	tf_idf_random_forest_1000
601	601	random_forest_1000	2.97764e+07	5456.77	0.329	1.1138	3668.38	tf_idf_random_forest_1000
602	602	random_forest_1000	2.98942e+07	5467.56	0.3264	1.1142	3675.29	tf_idf_random_forest_1000
603	603	random_forest_1000	2.98208e+07	5460.85	0.328	1.1139	3685.61	tf_idf_random_forest_1000
604	604	random_forest_1000	2.98524e+07	5463.73	0.3273	1.1141	3681.59	tf_idf_random_forest_1000
605	605	random_forest_1000	3.00528e+07	5482.05	0.3228	1.1148	3678.13	tf_idf_random_forest_1000
606	606	random_forest_1000	2.98658e+07	5464.96	0.327	1.1141	3675.88	tf_idf_random_forest_1000
607	607	random_forest_1000	2.97247e+07	5452.03	0.3302	1.1136	3668.91	tf_idf_random_forest_1000
608	608	random_forest_1000	3.01822e+07	5493.83	0.3199	1.1153	3691.34	tf_idf_random_forest_1000
609	609	random_forest_1000	2.98403e+07	5462.63	0.3276	1.114	3674.3	tf_idf_random_forest_1000
610	610	random_forest_1000	2.98968e+07	5467.8	0.3263	1.1142	3664.35	tf_idf_random_forest_1000
611	611	random_forest_1000	2.96305e+07	5443.39	0.3323	1.1132	3665.79	tf_idf_random_forest_1000
612	612	random_forest_1000	2.97442e+07	5453.83	0.3298	1.1136	3667.96	tf_idf_random_forest_1000
613	613	random_forest_1000	2.97467e+07	5454.06	0.3297	1.1136	3662.46	tf_idf_random_forest_1000
614	614	random_forest_1000	30015222	5478.61	0.3236	1.1147	3696.51	tf_idf_random_forest_1000
615	615	random_forest_1000	2.98648e+07	5464.87	0.327	1.1141	3660.23	tf_idf_random_forest_1000
616	616	random_forest_1000	3.01183e+07	5488.01	0.3213	1.1151	3699.18	tf_idf_random_forest_1000
617	617	random_forest_1000	3.00282e+07	5479.8	0.3234	1.1147	3694.49	tf_idf_random_forest_1000
618	618	random_forest_1000	2.98569e+07	5464.15	0.3272	1.1141	3681.45	tf_idf_random_forest_1000
619	619	random_forest_1000	3.02847e+07	5503.16	0.3176	1.1157	3693.5	tf_idf_random_forest_1000
620	620	random_forest_1000	2.98396e+07	5462.56	0.3276	1.114	3672.84	tf_idf_random_forest_1000
621	621	random_forest_1000	3.01073e+07	5487.01	0.3216	1.115	3685.32	tf_idf_random_forest_1000
622	622	random_forest_1000	2.99953e+07	5476.79	0.3241	1.1146	3683.42	tf_idf_random_forest_1000
623	623	random_forest_1000	2.98449e+07	5463.05	0.3275	1.114	3661.59	tf_idf_random_forest_1000
624	624	random_forest_1000	2.96845e+07	5448.35	0.3311	1.1134	3684.38	tf_idf_random_forest_1000
625	625	random_forest_1000	2.97399e+07	5453.43	0.3299	1.1136	3670.94	tf_idf_random_forest_1000
626	626	random_forest_1000	3.00188e+07	5478.94	0.3236	1.1147	3694.89	tf_idf_random_forest_1000
627	627	random_forest_1000	2.9814e+07	5460.22	0.3282	1.1139	3671.52	tf_idf_random_forest_1000
628	628	random_forest_1000	2.97823e+07	5457.32	0.3289	1.1138	3670.01	tf_idf_random_forest_1000
629	629	random_forest_1000	2.99116e+07	5469.15	0.326	1.1143	3671.05	tf_idf_random_forest_1000
630	630	random_forest_1000	2.98299e+07	5461.68	0.3278	1.114	3694.45	tf_idf_random_forest_1000
631	631	random_forest_1000	2.99055e+07	5468.59	0.3261	1.1143	3680.1	tf_idf_random_forest_1000
632	632	random_forest_1000	2.95399e+07	5435.06	0.3344	1.1129	3654.59	tf_idf_random_forest_1000
633	633	random_forest_1000	2.98112e+07	5459.96	0.3282	1.1139	3686.68	tf_idf_random_forest_1000
634	634	random_forest_1000	2.982e+07	5460.77	0.328	1.1139	3676.14	tf_idf_random_forest_1000
635	635	random_forest_1000	2.96681e+07	5446.84	0.3315	1.1133	3644.26	tf_idf_random_forest_1000
636	636	random_forest_1000	2.96634e+07	5446.41	0.3316	1.1133	3654.14	tf_idf_random_forest_1000
637	637	random_forest_1000	2.98233e+07	5461.07	0.328	1.1139	3672.84	tf_idf_random_forest_1000
638	638	random_forest_1000	2.97026e+07	5450.01	0.3307	1.1135	3642.64	tf_idf_random_forest_1000
639	639	random_forest_1000	3.03099e+07	5505.44	0.317	1.1158	3685.01	tf_idf_random_forest_1000
640	640	random_forest_1000	3.00543e+07	5482.18	0.3228	1.1148	3679.44	tf_idf_random_forest_1000
641	641	random_forest_1000	2.97623e+07	5455.48	0.3293	1.1137	3680.98	tf_idf_random_forest_1000
642	642	random_forest_1000	2.97984e+07	5458.79	0.3285	1.1138	3665.34	tf_idf_random_forest_1000
643	643	random_forest_1000	2.95579e+07	5436.72	0.334	1.1129	3652.82	tf_idf_random_forest_1000
644	644	random_forest_1000	2.95243e+07	5433.63	0.3347	1.1128	3666.93	tf_idf_random_forest_1000
645	645	random_forest_1000	2.97664e+07	5455.86	0.3293	1.1137	3676.66	tf_idf_random_forest_1000
646	646	random_forest_1000	2.96535e+07	5445.51	0.3318	1.1133	3649.52	tf_idf_random_forest_1000
647	647	random_forest_1000	2.97891e+07	5457.94	0.3287	1.1138	3671.82	tf_idf_random_forest_1000
648	648	random_forest_1000	3.00116e+07	5478.29	0.3237	1.1147	3693.09	tf_idf_random_forest_1000
649	649	random_forest_1000	2.96418e+07	5444.43	0.3321	1.1132	3671.74	tf_idf_random_forest_1000
650	650	mlp_100	3.11654e+07	5582.59	0.2977	1.1191	3795.09	tf_idf_mlp_100
651	651	mlp_100	3.11748e+07	5583.44	0.2975	1.1191	3790.98	tf_idf_mlp_100
652	652	mlp_100	3.0901e+07	5558.86	0.3037	1.1181	3693.7	tf_idf_mlp_100
653	653	mlp_100	31174472	5583.41	0.2975	1.1191	3787.24	tf_idf_mlp_100
654	654	mlp_100	3.11894e+07	5584.75	0.2972	1.1192	3782.6	tf_idf_mlp_100
655	655	mlp_100	3.11479e+07	5581.03	0.2981	1.119	3789.22	tf_idf_mlp_100
656	656	mlp_100	3.11711e+07	5583.11	0.2976	1.1191	3777.39	tf_idf_mlp_100
657	657	mlp_100	3.11855e+07	5584.4	0.2973	1.1191	3793.67	tf_idf_mlp_100
658	658	mlp_100	3.11872e+07	5584.55	0.2972	1.1192	3785.3	tf_idf_mlp_100
659	659	mlp_100	3.10811e+07	5575.04	0.2996	1.1187	3775.51	tf_idf_mlp_100
660	660	mlp_100	3.11901e+07	5584.81	0.2972	1.1192	3782.37	tf_idf_mlp_100
661	661	mlp_100	3.10246e+07	5569.97	0.3009	1.1185	3751.42	tf_idf_mlp_100
662	662	mlp_100	3.10436e+07	5571.68	0.3005	1.1186	3759.22	tf_idf_mlp_100
663	663	mlp_100	3.11083e+07	5577.49	0.299	1.1189	3786.4	tf_idf_mlp_100
664	664	mlp_100	3.11536e+07	5581.54	0.298	1.119	3794.42	tf_idf_mlp_100
665	665	mlp_100	3.09435e+07	5562.69	0.3027	1.1182	3721.35	tf_idf_mlp_100
666	666	mlp_100	3.11881e+07	5584.63	0.2972	1.1192	3793.34	tf_idf_mlp_100
667	667	mlp_100	3.09963e+07	5567.44	0.3015	1.1184	3743.37	tf_idf_mlp_100
668	668	mlp_100	3.11161e+07	5578.18	0.2988	1.1189	3779.35	tf_idf_mlp_100
669	669	mlp_100	3.1181e+07	5583.99	0.2974	1.1191	3797.6	tf_idf_mlp_100
670	670	mlp_100	3.12063e+07	5586.26	0.2968	1.1192	3776.45	tf_idf_mlp_100
671	671	mlp_100	3.08818e+07	5557.14	0.3041	1.118	3705.61	tf_idf_mlp_100
672	672	mlp_100	3.11781e+07	5583.74	0.2974	1.1191	3799.54	tf_idf_mlp_100
673	673	mlp_100	3.10214e+07	5569.69	0.301	1.1185	3746.56	tf_idf_mlp_100
674	674	mlp_100	3.11807e+07	5583.96	0.2974	1.1191	3801.97	tf_idf_mlp_100
675	675	mlp_100	3.11992e+07	5585.62	0.297	1.1192	3800.81	tf_idf_mlp_100
676	676	mlp_100	3.09081e+07	5559.51	0.3035	1.1181	3704.17	tf_idf_mlp_100
677	677	mlp_100	3.12032e+07	5585.98	0.2969	1.1192	3789.28	tf_idf_mlp_100
678	678	mlp_100	3.11787e+07	5583.79	0.2974	1.1191	3783.06	tf_idf_mlp_100
679	679	mlp_100	3.11559e+07	5581.75	0.2979	1.119	3784.44	tf_idf_mlp_100
680	680	mlp_100	3.11864e+07	5584.48	0.2973	1.1191	3789.47	tf_idf_mlp_100
681	681	mlp_100	3.11024e+07	5576.96	0.2991	1.1188	3777.26	tf_idf_mlp_100
682	682	mlp_100	3.1183e+07	5584.17	0.2973	1.1191	3795.78	tf_idf_mlp_100
683	683	mlp_100	3.07968e+07	5549.48	0.306	1.1177	3672.24	tf_idf_mlp_100
684	684	mlp_100	3.09058e+07	5559.3	0.3036	1.1181	3707.61	tf_idf_mlp_100
685	685	mlp_100	3.09358e+07	5561.99	0.3029	1.1182	3712.82	tf_idf_mlp_100
686	686	mlp_100	3.11107e+07	5577.7	0.299	1.1189	3778.71	tf_idf_mlp_100
687	687	mlp_100	3.1162e+07	5582.29	0.2978	1.1191	3780.92	tf_idf_mlp_100
688	688	mlp_100	3.09844e+07	5566.36	0.3018	1.1184	3735.46	tf_idf_mlp_100
689	689	mlp_100	3.10925e+07	5576.06	0.2994	1.1188	3782.58	tf_idf_mlp_100
690	690	mlp_100	3.11683e+07	5582.86	0.2977	1.1191	3778.96	tf_idf_mlp_100
691	691	mlp_100	3.11771e+07	5583.64	0.2975	1.1191	3793.6	tf_idf_mlp_100
692	692	mlp_100	3.097e+07	5565.07	0.3021	1.1183	3736.96	tf_idf_mlp_100
693	693	mlp_100	3.10604e+07	5573.18	0.3001	1.1187	3772.69	tf_idf_mlp_100
694	694	mlp_100	3.11561e+07	5581.76	0.2979	1.119	3790.71	tf_idf_mlp_100
695	695	mlp_100	3.1055e+07	5572.7	0.3002	1.1186	3760.85	tf_idf_mlp_100
696	696	mlp_100	3.10665e+07	5573.73	0.3	1.1187	3773.21	tf_idf_mlp_100
697	697	mlp_100	3.10228e+07	5569.81	0.3009	1.1185	3745.66	tf_idf_mlp_100
698	698	mlp_100	3.1205e+07	5586.15	0.2968	1.1192	3778.89	tf_idf_mlp_100
699	699	mlp_100	3.10276e+07	5570.24	0.3008	1.1185	3755.29	tf_idf_mlp_100
700	700	mlp_100_50	3.00463e+07	5481.45	0.3229	1.1148	3441.48	tf_idf_mlp_100_50
701	701	mlp_100_50	3.00342e+07	5480.34	0.3232	1.1147	3428.55	tf_idf_mlp_100_50
702	702	mlp_100_50	3.01061e+07	5486.9	0.3216	1.115	3400.96	tf_idf_mlp_100_50
703	703	mlp_100_50	2.99462e+07	5472.31	0.3252	1.1144	3430.88	tf_idf_mlp_100_50
704	704	mlp_100_50	3.06594e+07	5537.09	0.3091	1.1171	3508	tf_idf_mlp_100_50
705	705	mlp_100_50	2.99358e+07	5471.36	0.3254	1.1144	3440.23	tf_idf_mlp_100_50
706	706	mlp_100_50	3.09521e+07	5563.46	0.3025	1.1183	3683.94	tf_idf_mlp_100_50
707	707	mlp_100_50	3.02953e+07	5504.12	0.3173	1.1157	3458.12	tf_idf_mlp_100_50
708	708	mlp_100_50	3.01676e+07	5492.5	0.3202	1.1153	3411.45	tf_idf_mlp_100_50
709	709	mlp_100_50	2.99634e+07	5473.88	0.3248	1.1145	3443.77	tf_idf_mlp_100_50
710	710	mlp_100_50	3.08406e+07	5553.43	0.305	1.1178	3586.64	tf_idf_mlp_100_50
711	711	mlp_100_50	3.02163e+07	5496.94	0.3191	1.1154	3446.28	tf_idf_mlp_100_50
712	712	mlp_100_50	3.14117e+07	5604.61	0.2922	1.12	3737.3	tf_idf_mlp_100_50
713	713	mlp_100_50	3.16271e+07	5623.8	0.2873	1.1208	3767.8	tf_idf_mlp_100_50
714	714	mlp_100_50	3.04046e+07	5514.04	0.3149	1.1162	3576.06	tf_idf_mlp_100_50
715	715	mlp_100_50	3.00035e+07	5477.54	0.3239	1.1146	3416.71	tf_idf_mlp_100_50
716	716	mlp_100_50	3.01319e+07	5489.26	0.321	1.1151	3421.06	tf_idf_mlp_100_50
717	717	mlp_100_50	2.98845e+07	5466.67	0.3266	1.1142	3446.18	tf_idf_mlp_100_50
718	718	mlp_100_50	2.99556e+07	5473.17	0.325	1.1144	3419.2	tf_idf_mlp_100_50
719	719	mlp_100_50	3.01556e+07	5491.41	0.3205	1.1152	3409.2	tf_idf_mlp_100_50
720	720	mlp_100_50	3.01104e+07	5487.3	0.3215	1.115	3420.5	tf_idf_mlp_100_50
721	721	mlp_100_50	2.99462e+07	5472.31	0.3252	1.1144	3442.57	tf_idf_mlp_100_50
722	722	mlp_100_50	2.99119e+07	5469.18	0.326	1.1143	3451.15	tf_idf_mlp_100_50
723	723	mlp_100_50	3.01437e+07	5490.33	0.3208	1.1152	3411.44	tf_idf_mlp_100_50
724	724	mlp_100_50	3.12832e+07	5593.14	0.2951	1.1195	3670.5	tf_idf_mlp_100_50
725	725	mlp_100_50	3.00333e+07	5480.27	0.3232	1.1147	3421.34	tf_idf_mlp_100_50
726	726	mlp_100_50	3.02295e+07	5498.13	0.3188	1.1155	3402.83	tf_idf_mlp_100_50
727	727	mlp_100_50	2.99799e+07	5475.39	0.3244	1.1145	3415.84	tf_idf_mlp_100_50
728	728	mlp_100_50	3.01613e+07	5491.93	0.3204	1.1152	3396.54	tf_idf_mlp_100_50
729	729	mlp_100_50	3.06352e+07	5534.9	0.3097	1.117	3538.24	tf_idf_mlp_100_50
730	730	mlp_100_50	2.99388e+07	5471.63	0.3254	1.1144	3408.48	tf_idf_mlp_100_50
731	731	mlp_100_50	3.0633e+07	5534.7	0.3097	1.117	3562.17	tf_idf_mlp_100_50
732	732	mlp_100_50	3.12892e+07	5593.68	0.2949	1.1195	3718.07	tf_idf_mlp_100_50
733	733	mlp_100_50	3.00755e+07	5484.11	0.3223	1.1149	3455.8	tf_idf_mlp_100_50
734	734	mlp_100_50	3.00546e+07	5482.21	0.3228	1.1148	3470.67	tf_idf_mlp_100_50
735	735	mlp_100_50	3.00344e+07	5480.36	0.3232	1.1147	3422.26	tf_idf_mlp_100_50
736	736	mlp_100_50	3.01638e+07	5492.15	0.3203	1.1152	3483.67	tf_idf_mlp_100_50
737	737	mlp_100_50	3.06288e+07	5534.33	0.3098	1.117	3522.33	tf_idf_mlp_100_50
738	738	mlp_100_50	3.01894e+07	5494.49	0.3197	1.1153	3421.49	tf_idf_mlp_100_50
739	739	mlp_100_50	3.01282e+07	5488.92	0.3211	1.1151	3404.12	tf_idf_mlp_100_50
740	740	mlp_100_50	3.00499e+07	5481.78	0.3229	1.1148	3416.11	tf_idf_mlp_100_50
741	741	mlp_100_50	3.12057e+07	5586.2	0.2968	1.1192	3673.6	tf_idf_mlp_100_50
742	742	mlp_100_50	2.99327e+07	5471.08	0.3255	1.1144	3414.36	tf_idf_mlp_100_50
743	743	mlp_100_50	3.01331e+07	5489.36	0.321	1.1151	3383.37	tf_idf_mlp_100_50
744	744	mlp_100_50	3.02512e+07	5500.11	0.3183	1.1156	3376.44	tf_idf_mlp_100_50
745	745	mlp_100_50	3.02459e+07	5499.63	0.3184	1.1156	3420.96	tf_idf_mlp_100_50
746	746	mlp_100_50	3.06188e+07	5533.43	0.31	1.117	3542.13	tf_idf_mlp_100_50
747	747	mlp_100_50	2.99335e+07	5471.15	0.3255	1.1144	3429.34	tf_idf_mlp_100_50
748	748	mlp_100_50	3.00857e+07	5485.05	0.3221	1.1149	3414.71	tf_idf_mlp_100_50
749	749	mlp_100_50	3.01613e+07	5491.93	0.3204	1.1152	3379.35	tf_idf_mlp_100_50
750	750	mlp_100_100_50	3.01521e+07	5491.09	0.3206	1.1152	3356.82	tf_idf_mlp_100_100_50
751	751	mlp_100_100_50	3.01379e+07	5489.8	0.3209	1.1151	3354.72	tf_idf_mlp_100_100_50
752	752	mlp_100_100_50	2.99191e+07	5469.84	0.3258	1.1143	3339.3	tf_idf_mlp_100_100_50
753	753	mlp_100_100_50	3.02109e+07	5496.45	0.3192	1.1154	3347.33	tf_idf_mlp_100_100_50
754	754	mlp_100_100_50	3.01392e+07	5489.92	0.3209	1.1151	3345.88	tf_idf_mlp_100_100_50
755	755	mlp_100_100_50	3.02672e+07	5501.56	0.318	1.1156	3358.89	tf_idf_mlp_100_100_50
756	756	mlp_100_100_50	3.03348e+07	5507.7	0.3164	1.1159	3355.05	tf_idf_mlp_100_100_50
757	757	mlp_100_100_50	30074662	5484.04	0.3223	1.1149	3341.08	tf_idf_mlp_100_100_50
758	758	mlp_100_100_50	3.02275e+07	5497.95	0.3189	1.1155	3342.82	tf_idf_mlp_100_100_50
759	759	mlp_100_100_50	3.0275e+07	5502.28	0.3178	1.1157	3363.87	tf_idf_mlp_100_100_50
760	760	mlp_100_100_50	3.02235e+07	5497.59	0.319	1.1155	3339.03	tf_idf_mlp_100_100_50
761	761	mlp_100_100_50	3.0253e+07	5500.27	0.3183	1.1156	3358.23	tf_idf_mlp_100_100_50
762	762	mlp_100_100_50	3.00828e+07	5484.78	0.3221	1.1149	3344.99	tf_idf_mlp_100_100_50
763	763	mlp_100_100_50	3.03311e+07	5507.37	0.3165	1.1159	3340.08	tf_idf_mlp_100_100_50
764	764	mlp_100_100_50	3.01283e+07	5488.92	0.3211	1.1151	3360.38	tf_idf_mlp_100_100_50
765	765	mlp_100_100_50	3.0086e+07	5485.07	0.3221	1.1149	3347.69	tf_idf_mlp_100_100_50
766	766	mlp_100_100_50	2.99537e+07	5473	0.325	1.1144	3334.92	tf_idf_mlp_100_100_50
767	767	mlp_100_100_50	3.01468e+07	5490.61	0.3207	1.1152	3348.22	tf_idf_mlp_100_100_50
768	768	mlp_100_100_50	3.01759e+07	5493.26	0.32	1.1153	3410.81	tf_idf_mlp_100_100_50
769	769	mlp_100_100_50	3.02143e+07	5496.76	0.3192	1.1154	3359.53	tf_idf_mlp_100_100_50
770	770	mlp_100_100_50	2.99518e+07	5472.82	0.3251	1.1144	3390.84	tf_idf_mlp_100_100_50
771	771	mlp_100_100_50	3.0059e+07	5482.61	0.3227	1.1148	3339.94	tf_idf_mlp_100_100_50
772	772	mlp_100_100_50	3.03725e+07	5511.13	0.3156	1.116	3341.75	tf_idf_mlp_100_100_50
773	773	mlp_100_100_50	2.99487e+07	5472.54	0.3251	1.1144	3414.86	tf_idf_mlp_100_100_50
774	774	mlp_100_100_50	3.05377e+07	5526.09	0.3119	1.1167	3358.47	tf_idf_mlp_100_100_50
775	775	mlp_100_100_50	3.03122e+07	5505.66	0.317	1.1158	3350.46	tf_idf_mlp_100_100_50
776	776	mlp_100_100_50	3.0276e+07	5502.37	0.3178	1.1157	3362.5	tf_idf_mlp_100_100_50
777	777	mlp_100_100_50	2.99684e+07	5474.34	0.3247	1.1145	3338.62	tf_idf_mlp_100_100_50
778	778	mlp_100_100_50	3.01971e+07	5495.18	0.3196	1.1154	3338.89	tf_idf_mlp_100_100_50
779	779	mlp_100_100_50	3.01708e+07	5492.8	0.3201	1.1153	3342.48	tf_idf_mlp_100_100_50
780	780	mlp_100_100_50	2.9944e+07	5472.12	0.3253	1.1144	3369.88	tf_idf_mlp_100_100_50
781	781	mlp_100_100_50	2.99887e+07	5476.19	0.3242	1.1146	3352.11	tf_idf_mlp_100_100_50
782	782	mlp_100_100_50	3.01064e+07	5486.93	0.3216	1.115	3350.35	tf_idf_mlp_100_100_50
783	783	mlp_100_100_50	3.01255e+07	5488.67	0.3212	1.1151	3364.63	tf_idf_mlp_100_100_50
784	784	mlp_100_100_50	3.01095e+07	5487.21	0.3215	1.115	3350.51	tf_idf_mlp_100_100_50
785	785	mlp_100_100_50	2.99474e+07	5472.42	0.3252	1.1144	3385.66	tf_idf_mlp_100_100_50
786	786	mlp_100_100_50	3.0008e+07	5477.95	0.3238	1.1146	3342.78	tf_idf_mlp_100_100_50
787	787	mlp_100_100_50	3.00767e+07	5484.22	0.3223	1.1149	3346.35	tf_idf_mlp_100_100_50
788	788	mlp_100_100_50	2.99738e+07	5474.83	0.3246	1.1145	3372.62	tf_idf_mlp_100_100_50
789	789	mlp_100_100_50	3.01956e+07	5495.05	0.3196	1.1154	3372.79	tf_idf_mlp_100_100_50
790	790	mlp_100_100_50	3.00422e+07	5481.08	0.323	1.1148	3358.54	tf_idf_mlp_100_100_50
791	791	mlp_100_100_50	2.99138e+07	5469.35	0.3259	1.1143	3366.75	tf_idf_mlp_100_100_50
792	792	mlp_100_100_50	3.02652e+07	5501.38	0.318	1.1156	3362.96	tf_idf_mlp_100_100_50
793	793	mlp_100_100_50	3.02197e+07	5497.24	0.319	1.1155	3338.77	tf_idf_mlp_100_100_50
794	794	mlp_100_100_50	3.01851e+07	5494.1	0.3198	1.1153	3371.18	tf_idf_mlp_100_100_50
795	795	mlp_100_100_50	3.01257e+07	5488.69	0.3212	1.1151	3337.09	tf_idf_mlp_100_100_50
796	796	mlp_100_100_50	3.02024e+07	5495.67	0.3194	1.1154	3369.36	tf_idf_mlp_100_100_50
797	797	mlp_100_100_50	3.03464e+07	5508.76	0.3162	1.1159	3353.46	tf_idf_mlp_100_100_50
798	798	mlp_100_100_50	3.02045e+07	5495.86	0.3194	1.1154	3364.47	tf_idf_mlp_100_100_50
799	799	mlp_100_100_50	3.03515e+07	5509.22	0.3161	1.116	3354.72	tf_idf_mlp_100_100_50
800	800	decision_tree	5.49478e+07	7412.68	-0.2382	1.2099	4700.32	tf_idf_decision_tree
801	801	decision_tree	5.04394e+07	7102.07	-0.1366	1.1927	4594.75	tf_idf_decision_tree
802	802	decision_tree	5.42221e+07	7363.56	-0.2218	1.2072	4599.66	tf_idf_decision_tree
803	803	decision_tree	5.21949e+07	7224.61	-0.1761	1.1994	4576.24	tf_idf_decision_tree
804	804	decision_tree	4.28401e+07	6545.23	0.0347	1.1637	4204.32	tf_idf_decision_tree
805	805	decision_tree	4.75115e+07	6892.86	-0.0706	1.1815	4355.95	tf_idf_decision_tree
806	806	decision_tree	4.70112e+07	6856.47	-0.0593	1.1796	4404.62	tf_idf_decision_tree
807	807	decision_tree	5.28221e+07	7267.88	-0.1903	1.2018	4480.15	tf_idf_decision_tree
808	808	decision_tree	6.16197e+07	7849.82	-0.3885	1.2354	5031.47	tf_idf_decision_tree
809	809	decision_tree	4.91065e+07	7007.61	-0.1065	1.1876	4564.58	tf_idf_decision_tree
810	810	decision_tree	4.28186e+07	6543.59	0.0351	1.1636	4233.85	tf_idf_decision_tree
811	811	decision_tree	4.5801e+07	6767.64	-0.0321	1.175	4402.04	tf_idf_decision_tree
812	812	decision_tree	4.83255e+07	6951.65	-0.0889	1.1846	4635.79	tf_idf_decision_tree
813	813	decision_tree	6.32428e+07	7952.54	-0.4251	1.2416	4854.29	tf_idf_decision_tree
814	814	decision_tree	5.09758e+07	7139.73	-0.1487	1.1948	4484.85	tf_idf_decision_tree
815	815	decision_tree	4.44442e+07	6666.65	-0.0015	1.1698	4255.97	tf_idf_decision_tree
816	816	decision_tree	5.56406e+07	7459.27	-0.2538	1.2126	4670.25	tf_idf_decision_tree
817	817	decision_tree	4.89379e+07	6995.56	-0.1027	1.187	4271.21	tf_idf_decision_tree
818	818	decision_tree	6.23659e+07	7897.21	-0.4053	1.2383	4763.23	tf_idf_decision_tree
819	819	decision_tree	4.98132e+07	7057.85	-0.1225	1.1903	4391.8	tf_idf_decision_tree
820	820	decision_tree	4.93651e+07	7026.03	-0.1124	1.1886	4383.79	tf_idf_decision_tree
821	821	decision_tree	5.3132e+07	7289.17	-0.1973	1.203	4696.44	tf_idf_decision_tree
822	822	decision_tree	4.14172e+07	6435.62	0.0667	1.1582	4200.98	tf_idf_decision_tree
823	823	decision_tree	5.3266e+07	7298.36	-0.2003	1.2035	4506.7	tf_idf_decision_tree
824	824	decision_tree	4.61228e+07	6791.37	-0.0393	1.1762	4443.39	tf_idf_decision_tree
825	825	decision_tree	5.1717e+07	7191.45	-0.1654	1.1976	4480.21	tf_idf_decision_tree
826	826	decision_tree	4.40204e+07	6634.79	0.0081	1.1682	4344.45	tf_idf_decision_tree
827	827	decision_tree	4.66739e+07	6831.83	-0.0517	1.1783	4414.25	tf_idf_decision_tree
828	828	decision_tree	4.4772e+07	6691.19	-0.0089	1.1711	4296.7	tf_idf_decision_tree
829	829	decision_tree	4.66998e+07	6833.72	-0.0523	1.1784	4326.54	tf_idf_decision_tree
830	830	decision_tree	5.47685e+07	7400.58	-0.2341	1.2092	4714.65	tf_idf_decision_tree
831	831	decision_tree	6.1047e+07	7813.26	-0.3756	1.2332	4768.26	tf_idf_decision_tree
832	832	decision_tree	4.24219e+07	6513.21	0.0441	1.1621	4355.05	tf_idf_decision_tree
833	833	decision_tree	4.90121e+07	7000.86	-0.1044	1.1873	4424.91	tf_idf_decision_tree
834	834	decision_tree	5.25279e+07	7247.61	-0.1836	1.2007	4585.51	tf_idf_decision_tree
835	835	decision_tree	4.37016e+07	6610.72	0.0152	1.167	4423.52	tf_idf_decision_tree
836	836	decision_tree	5.89115e+07	7675.38	-0.3275	1.2251	4735.42	tf_idf_decision_tree
837	837	decision_tree	4.18303e+07	6467.64	0.0574	1.1598	4140.48	tf_idf_decision_tree
838	838	decision_tree	4.38682e+07	6623.31	0.0115	1.1676	4291.07	tf_idf_decision_tree
839	839	decision_tree	4.45651e+07	6675.71	-0.0042	1.1703	4347.1	tf_idf_decision_tree
840	840	decision_tree	4.77503e+07	6910.16	-0.076	1.1824	4345.38	tf_idf_decision_tree
841	841	decision_tree	4.72887e+07	6876.68	-0.0656	1.1807	4570.21	tf_idf_decision_tree
842	842	decision_tree	4.85642e+07	6968.8	-0.0943	1.1855	4498.75	tf_idf_decision_tree
843	843	decision_tree	4.29048e+07	6550.18	0.0332	1.1639	4360.28	tf_idf_decision_tree
844	844	decision_tree	4.6849e+07	6844.63	-0.0557	1.179	4577.17	tf_idf_decision_tree
845	845	decision_tree	4.83468e+07	6953.19	-0.0894	1.1847	4407.36	tf_idf_decision_tree
846	846	decision_tree	4.5625e+07	6754.63	-0.0281	1.1743	4373.17	tf_idf_decision_tree
847	847	decision_tree	5.14323e+07	7171.63	-0.159	1.1965	4430.15	tf_idf_decision_tree
848	848	decision_tree	4.84987e+07	6964.1	-0.0929	1.1853	4506.04	tf_idf_decision_tree
849	849	decision_tree	4.26952e+07	6534.15	0.0379	1.1631	4279.1	tf_idf_decision_tree
850	850	adaboost	3.14663e+07	5609.48	0.2909	1.1202	4456.47	tf_idf_adaboost
851	851	adaboost	3.04746e+07	5520.38	0.3133	1.1164	4339.24	tf_idf_adaboost
852	852	adaboost	3.43486e+07	5860.77	0.226	1.1312	4606.08	tf_idf_adaboost
853	853	adaboost	3.2376e+07	5689.99	0.2705	1.1237	4497.35	tf_idf_adaboost
854	854	adaboost	3.06487e+07	5536.12	0.3094	1.1171	4395.13	tf_idf_adaboost
855	855	adaboost	3.12789e+07	5592.76	0.2952	1.1195	4421.85	tf_idf_adaboost
856	856	adaboost	3.11291e+07	5579.35	0.2985	1.1189	4403.66	tf_idf_adaboost
857	857	adaboost	3.25007e+07	5700.93	0.2676	1.1242	4489.4	tf_idf_adaboost
858	858	adaboost	3.03382e+07	5508.01	0.3164	1.1159	4402.78	tf_idf_adaboost
859	859	adaboost	3.4025e+07	5833.1	0.2333	1.13	4546.96	tf_idf_adaboost
860	860	adaboost	2.97108e+07	5450.76	0.3305	1.1135	4350.27	tf_idf_adaboost
861	861	adaboost	3.09809e+07	5566.05	0.3019	1.1184	4449.43	tf_idf_adaboost
862	862	adaboost	3.22802e+07	5681.57	0.2726	1.1233	4533.77	tf_idf_adaboost
863	863	adaboost	3.17397e+07	5633.8	0.2848	1.1213	4517.42	tf_idf_adaboost
864	864	adaboost	3.22996e+07	5683.27	0.2722	1.1234	4478.91	tf_idf_adaboost
865	865	adaboost	3.29171e+07	5737.34	0.2583	1.1258	4561.36	tf_idf_adaboost
866	866	adaboost	3.07739e+07	5547.42	0.3066	1.1176	4303.58	tf_idf_adaboost
867	867	adaboost	3.21026e+07	5665.91	0.2766	1.1226	4504.9	tf_idf_adaboost
868	868	adaboost	2.99636e+07	5473.91	0.3248	1.1145	4394.88	tf_idf_adaboost
869	869	adaboost	3.15886e+07	5620.38	0.2882	1.1207	4459.58	tf_idf_adaboost
870	870	adaboost	2.97784e+07	5456.96	0.329	1.1138	4437.08	tf_idf_adaboost
871	871	adaboost	28815432	5368	0.3507	1.1101	4344.95	tf_idf_adaboost
872	872	adaboost	3.18377e+07	5642.49	0.2826	1.1216	4565.61	tf_idf_adaboost
873	873	adaboost	3.13886e+07	5602.56	0.2927	1.1199	4453.51	tf_idf_adaboost
874	874	adaboost	3.22581e+07	5679.62	0.2731	1.1232	4473.73	tf_idf_adaboost
875	875	adaboost	3.23188e+07	5684.96	0.2717	1.1235	4445.04	tf_idf_adaboost
876	876	adaboost	3.08676e+07	5555.86	0.3044	1.1179	4468.33	tf_idf_adaboost
877	877	adaboost	2.99024e+07	5468.31	0.3262	1.1142	4420.56	tf_idf_adaboost
878	878	adaboost	3.05338e+07	5525.74	0.312	1.1167	4373.05	tf_idf_adaboost
879	879	adaboost	2.99934e+07	5476.62	0.3241	1.1146	4345.16	tf_idf_adaboost
880	880	adaboost	3.17328e+07	5633.19	0.2849	1.1212	4472.56	tf_idf_adaboost
881	881	adaboost	3.14053e+07	5604.04	0.2923	1.12	4369.96	tf_idf_adaboost
882	882	adaboost	3.25148e+07	5702.17	0.2673	1.1242	4388.65	tf_idf_adaboost
883	883	adaboost	3.21193e+07	5667.39	0.2762	1.1227	4415.34	tf_idf_adaboost
884	884	adaboost	3.15291e+07	5615.07	0.2895	1.1205	4523.2	tf_idf_adaboost
885	885	adaboost	3.1645e+07	5625.39	0.2869	1.1209	4441.67	tf_idf_adaboost
886	886	adaboost	3.08155e+07	5551.17	0.3056	1.1177	4470.19	tf_idf_adaboost
887	887	adaboost	3.21638e+07	5671.31	0.2752	1.1229	4520.63	tf_idf_adaboost
888	888	adaboost	3.15434e+07	5616.35	0.2892	1.1205	4537.77	tf_idf_adaboost
889	889	adaboost	3.18756e+07	5645.85	0.2817	1.1218	4468.49	tf_idf_adaboost
890	890	adaboost	3.17001e+07	5630.29	0.2857	1.1211	4477.34	tf_idf_adaboost
891	891	adaboost	3.13785e+07	5601.65	0.2929	1.1199	4451.33	tf_idf_adaboost
892	892	adaboost	3.28843e+07	5734.48	0.259	1.1256	4534.79	tf_idf_adaboost
893	893	adaboost	2.97521e+07	5454.55	0.3296	1.1137	4372.61	tf_idf_adaboost
894	894	adaboost	3.01775e+07	5493.4	0.32	1.1153	4386.39	tf_idf_adaboost
895	895	adaboost	3.31653e+07	5758.93	0.2527	1.1267	4485.13	tf_idf_adaboost
896	896	adaboost	3.19202e+07	5649.8	0.2807	1.122	4510.88	tf_idf_adaboost
897	897	adaboost	3.12729e+07	5592.22	0.2953	1.1195	4457.25	tf_idf_adaboost
898	898	adaboost	3.21189e+07	5667.35	0.2762	1.1227	4520.86	tf_idf_adaboost
899	899	adaboost	3.12304e+07	5588.42	0.2963	1.1193	4479.06	tf_idf_adaboost
900	900	bagging	3.23915e+07	5691.35	0.2701	1.1238	3831.17	tf_idf_bagging
901	901	bagging	2.94041e+07	5422.55	0.3374	1.1123	3549.95	tf_idf_bagging
902	902	bagging	3.37611e+07	5810.43	0.2392	1.129	3912.83	tf_idf_bagging
903	903	bagging	3.2843e+07	5730.88	0.2599	1.1255	3821.17	tf_idf_bagging
904	904	bagging	2.88223e+07	5368.64	0.3505	1.1101	3611.13	tf_idf_bagging
905	905	bagging	3.30317e+07	5747.32	0.2557	1.1262	3859.43	tf_idf_bagging
906	906	bagging	3.03341e+07	5507.64	0.3165	1.1159	3798.28	tf_idf_bagging
907	907	bagging	3.59623e+07	5996.86	0.1896	1.1374	4025.97	tf_idf_bagging
908	908	bagging	2.97006e+07	5449.82	0.3307	1.1135	3646.66	tf_idf_bagging
909	909	bagging	3.4039e+07	5834.29	0.233	1.13	3787.33	tf_idf_bagging
910	910	bagging	3.02831e+07	5503.01	0.3176	1.1157	3651.04	tf_idf_bagging
911	911	bagging	3.36525e+07	5801.08	0.2417	1.1286	4052.77	tf_idf_bagging
912	912	bagging	3.56434e+07	5970.21	0.1968	1.1362	3959.85	tf_idf_bagging
913	913	bagging	3.03962e+07	5513.27	0.3151	1.1161	3716	tf_idf_bagging
914	914	bagging	3.3509e+07	5788.7	0.2449	1.128	3901.37	tf_idf_bagging
915	915	bagging	3.11495e+07	5581.17	0.2981	1.119	3848.36	tf_idf_bagging
916	916	bagging	2.69657e+07	5192.85	0.3924	1.103	3592.43	tf_idf_bagging
917	917	bagging	3.09877e+07	5566.66	0.3017	1.1184	3711.44	tf_idf_bagging
918	918	bagging	3.20347e+07	5659.92	0.2781	1.1224	3923.32	tf_idf_bagging
919	919	bagging	3.09596e+07	5564.13	0.3024	1.1183	3824.29	tf_idf_bagging
920	920	bagging	3.28278e+07	5729.55	0.2603	1.1254	3754.78	tf_idf_bagging
921	921	bagging	3.1059e+07	5573.06	0.3001	1.1187	3670.85	tf_idf_bagging
922	922	bagging	32559598	5706.1	0.2663	1.1244	3811.47	tf_idf_bagging
923	923	bagging	3.18561e+07	5644.12	0.2822	1.1217	3809.84	tf_idf_bagging
924	924	bagging	29064955	5391.19	0.3451	1.111	3716.4	tf_idf_bagging
925	925	bagging	3.11956e+07	5585.3	0.2971	1.1192	3869.35	tf_idf_bagging
926	926	bagging	3.10886e+07	5575.71	0.2995	1.1188	3715.94	tf_idf_bagging
927	927	bagging	3.0827e+07	5552.21	0.3054	1.1178	3715.01	tf_idf_bagging
928	928	bagging	3.21003e+07	5665.71	0.2767	1.1226	3831.14	tf_idf_bagging
929	929	bagging	3.0495e+07	5522.23	0.3128	1.1165	3640.88	tf_idf_bagging
930	930	bagging	2.94859e+07	5430.1	0.3356	1.1127	3600.61	tf_idf_bagging
931	931	bagging	2.9596e+07	5440.22	0.3331	1.1131	3667.76	tf_idf_bagging
932	932	bagging	3.24569e+07	5697.09	0.2686	1.124	3922.93	tf_idf_bagging
933	933	bagging	3.12803e+07	5592.88	0.2951	1.1195	3713.06	tf_idf_bagging
934	934	bagging	3.26584e+07	5714.75	0.2641	1.1248	3948.83	tf_idf_bagging
935	935	bagging	3.11478e+07	5581.02	0.2981	1.119	3758.26	tf_idf_bagging
936	936	bagging	3.09439e+07	5562.73	0.3027	1.1182	3837.52	tf_idf_bagging
937	937	bagging	3.07448e+07	5544.8	0.3072	1.1175	3696.57	tf_idf_bagging
938	938	bagging	3.26371e+07	5712.89	0.2646	1.1247	3899.47	tf_idf_bagging
939	939	bagging	3.14274e+07	5606.01	0.2918	1.1201	3616.8	tf_idf_bagging
940	940	bagging	3.25157e+07	5702.26	0.2673	1.1242	3764.29	tf_idf_bagging
941	941	bagging	3.26934e+07	5717.81	0.2633	1.1249	3709.22	tf_idf_bagging
942	942	bagging	3.00063e+07	5477.8	0.3238	1.1146	3639.98	tf_idf_bagging
943	943	bagging	3.20285e+07	5659.37	0.2783	1.1224	3740.54	tf_idf_bagging
944	944	bagging	3.27812e+07	5725.49	0.2613	1.1252	3778.98	tf_idf_bagging
945	945	bagging	3.54893e+07	5957.29	0.2003	1.1356	3894.97	tf_idf_bagging
946	946	bagging	3.11003e+07	5576.76	0.2992	1.1188	3727.23	tf_idf_bagging
947	947	bagging	3.11728e+07	5583.26	0.2976	1.1191	3830.14	tf_idf_bagging
948	948	bagging	3.34835e+07	5786.49	0.2455	1.1279	3828.53	tf_idf_bagging
949	949	bagging	3.60704e+07	6005.86	0.1872	1.1378	4080.78	tf_idf_bagging
950	950	extra_trees	2.93101e+07	5413.88	0.3395	1.112	3515.76	tf_idf_extra_trees
951	951	extra_trees	2.9781e+07	5457.19	0.3289	1.1138	3557.38	tf_idf_extra_trees
952	952	extra_trees	2.99694e+07	5474.43	0.3247	1.1145	3569.73	tf_idf_extra_trees
953	953	extra_trees	28664884	5353.96	0.3541	1.1095	3519.12	tf_idf_extra_trees
954	954	extra_trees	3.03757e+07	5511.41	0.3155	1.1161	3560.87	tf_idf_extra_trees
955	955	extra_trees	2.94781e+07	5429.38	0.3358	1.1126	3505.94	tf_idf_extra_trees
956	956	extra_trees	2.9756e+07	5454.9	0.3295	1.1137	3530.04	tf_idf_extra_trees
957	957	extra_trees	2.86771e+07	5355.1	0.3538	1.1096	3563.97	tf_idf_extra_trees
958	958	extra_trees	2.93589e+07	5418.39	0.3384	1.1122	3574.58	tf_idf_extra_trees
959	959	extra_trees	2.89747e+07	5382.82	0.3471	1.1107	3488.05	tf_idf_extra_trees
960	960	extra_trees	2.88494e+07	5371.16	0.3499	1.1102	3508.13	tf_idf_extra_trees
961	961	extra_trees	2.88665e+07	5372.75	0.3495	1.1103	3503.61	tf_idf_extra_trees
962	962	extra_trees	2.92295e+07	5406.43	0.3414	1.1117	3497.01	tf_idf_extra_trees
963	963	extra_trees	2.96697e+07	5446.99	0.3314	1.1134	3578.7	tf_idf_extra_trees
964	964	extra_trees	2.86102e+07	5348.85	0.3553	1.1093	3466.19	tf_idf_extra_trees
965	965	extra_trees	2.8849e+07	5371.13	0.3499	1.1102	3519.83	tf_idf_extra_trees
966	966	extra_trees	2.92988e+07	5412.83	0.3398	1.1119	3553.68	tf_idf_extra_trees
967	967	extra_trees	2.86047e+07	5348.34	0.3554	1.1093	3540.02	tf_idf_extra_trees
968	968	extra_trees	2.90665e+07	5391.33	0.345	1.1111	3513.23	tf_idf_extra_trees
969	969	extra_trees	2.87756e+07	5364.28	0.3516	1.1099	3521.88	tf_idf_extra_trees
970	970	extra_trees	2.81498e+07	5305.64	0.3657	1.1075	3492.75	tf_idf_extra_trees
971	971	extra_trees	2.99455e+07	5472.25	0.3252	1.1144	3532.04	tf_idf_extra_trees
972	972	extra_trees	2.94348e+07	5425.39	0.3367	1.1125	3536.54	tf_idf_extra_trees
973	973	extra_trees	2.88429e+07	5370.56	0.3501	1.1102	3516.13	tf_idf_extra_trees
974	974	extra_trees	2.98244e+07	5461.17	0.3279	1.1139	3518.78	tf_idf_extra_trees
975	975	extra_trees	2.85204e+07	5340.45	0.3573	1.109	3456.06	tf_idf_extra_trees
976	976	extra_trees	2.93911e+07	5421.36	0.3377	1.1123	3529.39	tf_idf_extra_trees
977	977	extra_trees	2.94471e+07	5426.51	0.3365	1.1125	3528.32	tf_idf_extra_trees
978	978	extra_trees	2.88713e+07	5373.21	0.3494	1.1103	3529.33	tf_idf_extra_trees
979	979	extra_trees	2.83302e+07	5322.61	0.3616	1.1082	3494.55	tf_idf_extra_trees
980	980	extra_trees	2.96233e+07	5442.73	0.3325	1.1132	3568.78	tf_idf_extra_trees
981	981	extra_trees	2.85323e+07	5341.56	0.3571	1.109	3507.25	tf_idf_extra_trees
982	982	extra_trees	2.90604e+07	5390.77	0.3452	1.111	3502.04	tf_idf_extra_trees
983	983	extra_trees	2.9376e+07	5419.96	0.3381	1.1122	3551.92	tf_idf_extra_trees
984	984	extra_trees	3.03387e+07	5508.06	0.3164	1.1159	3620.31	tf_idf_extra_trees
985	985	extra_trees	2.94446e+07	5426.29	0.3365	1.1125	3518.48	tf_idf_extra_trees
986	986	extra_trees	2.98737e+07	5465.68	0.3268	1.1141	3579.33	tf_idf_extra_trees
987	987	extra_trees	2.85918e+07	5347.13	0.3557	1.1092	3506.56	tf_idf_extra_trees
988	988	extra_trees	2.87094e+07	5358.11	0.3531	1.1097	3475.34	tf_idf_extra_trees
989	989	extra_trees	2.84909e+07	5337.69	0.358	1.1089	3499.24	tf_idf_extra_trees
990	990	extra_trees	3.00719e+07	5483.79	0.3224	1.1149	3569.07	tf_idf_extra_trees
991	991	extra_trees	2.8954e+07	5380.89	0.3476	1.1106	3522.37	tf_idf_extra_trees
992	992	extra_trees	2.93336e+07	5416.05	0.339	1.1121	3537.79	tf_idf_extra_trees
993	993	extra_trees	2.83807e+07	5327.35	0.3605	1.1084	3507.95	tf_idf_extra_trees
994	994	extra_trees	2.9596e+07	5440.22	0.3331	1.1131	3521.81	tf_idf_extra_trees
995	995	extra_trees	2.9639e+07	5444.17	0.3321	1.1132	3538.74	tf_idf_extra_trees
996	996	extra_trees	2.96432e+07	5444.56	0.332	1.1133	3583.32	tf_idf_extra_trees
997	997	extra_trees	2.90126e+07	5386.34	0.3462	1.1108	3499.39	tf_idf_extra_trees
998	998	extra_trees	2.93186e+07	5414.67	0.3393	1.112	3535.76	tf_idf_extra_trees
999	999	extra_trees	2.96565e+07	5445.78	0.3317	1.1133	3548.13	tf_idf_extra_trees
1000	1000	gradient_boosting	2.55571e+07	5055.4	0.4241	1.0976	3510.22	tf_idf_gradient_boosting
1001	1001	gradient_boosting	2.49494e+07	4994.94	0.4378	1.0953	3461.4	tf_idf_gradient_boosting
1002	1002	gradient_boosting	2.53788e+07	5037.74	0.4281	1.097	3493.44	tf_idf_gradient_boosting
1003	1003	gradient_boosting	2.51935e+07	5019.31	0.4323	1.0963	3471.55	tf_idf_gradient_boosting
1004	1004	gradient_boosting	2.55137e+07	5051.11	0.4251	1.0975	3532.93	tf_idf_gradient_boosting
1005	1005	gradient_boosting	2.50679e+07	5006.79	0.4351	1.0958	3489.69	tf_idf_gradient_boosting
1006	1006	gradient_boosting	2.48182e+07	4981.79	0.4408	1.0948	3458.53	tf_idf_gradient_boosting
1007	1007	gradient_boosting	2.53287e+07	5032.76	0.4293	1.0968	3497.01	tf_idf_gradient_boosting
1008	1008	gradient_boosting	2.51859e+07	5018.56	0.4325	1.0962	3590.07	tf_idf_gradient_boosting
1009	1009	gradient_boosting	2.55605e+07	5055.74	0.424	1.0977	3504.35	tf_idf_gradient_boosting
1010	1010	gradient_boosting	2.49662e+07	4996.62	0.4374	1.0954	3475.56	tf_idf_gradient_boosting
1011	1011	gradient_boosting	2.55374e+07	5053.45	0.4245	1.0976	3530.71	tf_idf_gradient_boosting
1012	1012	gradient_boosting	2.52999e+07	5029.9	0.4299	1.0967	3486.87	tf_idf_gradient_boosting
1013	1013	gradient_boosting	2.514e+07	5013.98	0.4335	1.096	3474.46	tf_idf_gradient_boosting
1014	1014	gradient_boosting	2.53602e+07	5035.89	0.4285	1.0969	3507.76	tf_idf_gradient_boosting
1015	1015	gradient_boosting	2.49075e+07	4990.74	0.4387	1.0952	3480.64	tf_idf_gradient_boosting
1016	1016	gradient_boosting	2.51261e+07	5012.59	0.4338	1.096	3465.85	tf_idf_gradient_boosting
1017	1017	gradient_boosting	2.51435e+07	5014.32	0.4334	1.0961	3487.62	tf_idf_gradient_boosting
1018	1018	gradient_boosting	2.51741e+07	5017.38	0.4327	1.0962	3489.92	tf_idf_gradient_boosting
1019	1019	gradient_boosting	2.52021e+07	5020.17	0.4321	1.0963	3455.67	tf_idf_gradient_boosting
1020	1020	gradient_boosting	2.57736e+07	5076.77	0.4192	1.0985	3537.51	tf_idf_gradient_boosting
1021	1021	gradient_boosting	2.52676e+07	5026.69	0.4306	1.0965	3502.79	tf_idf_gradient_boosting
1022	1022	gradient_boosting	2.50823e+07	5008.22	0.4348	1.0958	3479.78	tf_idf_gradient_boosting
1023	1023	gradient_boosting	2.52809e+07	5028.01	0.4303	1.0966	3575.58	tf_idf_gradient_boosting
1024	1024	gradient_boosting	2.52032e+07	5020.28	0.4321	1.0963	3499.67	tf_idf_gradient_boosting
1025	1025	gradient_boosting	2.5206e+07	5020.56	0.432	1.0963	3443.11	tf_idf_gradient_boosting
1026	1026	gradient_boosting	2.51757e+07	5017.54	0.4327	1.0962	3497.72	tf_idf_gradient_boosting
1027	1027	gradient_boosting	2.51818e+07	5018.15	0.4326	1.0962	3493.5	tf_idf_gradient_boosting
1028	1028	gradient_boosting	2.56155e+07	5061.18	0.4228	1.0979	3534.48	tf_idf_gradient_boosting
1029	1029	gradient_boosting	2.49599e+07	4995.99	0.4376	1.0954	3465.91	tf_idf_gradient_boosting
1030	1030	gradient_boosting	2.53657e+07	5036.44	0.4284	1.0969	3489.69	tf_idf_gradient_boosting
1031	1031	gradient_boosting	2.44273e+07	4942.4	0.4496	1.0933	3437.59	tf_idf_gradient_boosting
1032	1032	gradient_boosting	2.48929e+07	4989.28	0.4391	1.0951	3469.94	tf_idf_gradient_boosting
1033	1033	gradient_boosting	2.54939e+07	5049.15	0.4255	1.0974	3510.17	tf_idf_gradient_boosting
1034	1034	gradient_boosting	2.5643e+07	5063.89	0.4222	1.098	3522.68	tf_idf_gradient_boosting
1035	1035	gradient_boosting	2.47412e+07	4974.05	0.4425	1.0945	3439.56	tf_idf_gradient_boosting
1036	1036	gradient_boosting	2.528e+07	5027.92	0.4304	1.0966	3491.14	tf_idf_gradient_boosting
1037	1037	gradient_boosting	2.5507e+07	5050.45	0.4252	1.0975	3508.88	tf_idf_gradient_boosting
1038	1038	gradient_boosting	2.54268e+07	5042.5	0.427	1.0971	3508.56	tf_idf_gradient_boosting
1039	1039	gradient_boosting	2.52532e+07	5025.25	0.431	1.0965	3469.65	tf_idf_gradient_boosting
1040	1040	gradient_boosting	2.53761e+07	5037.47	0.4282	1.097	3506.48	tf_idf_gradient_boosting
1041	1041	gradient_boosting	2.5524e+07	5052.12	0.4249	1.0975	3535.5	tf_idf_gradient_boosting
1042	1042	gradient_boosting	2.53459e+07	5034.47	0.4289	1.0968	3515.17	tf_idf_gradient_boosting
1043	1043	gradient_boosting	2.54277e+07	5042.58	0.427	1.0971	3491.84	tf_idf_gradient_boosting
1044	1044	gradient_boosting	2.50405e+07	5004.05	0.4357	1.0957	3474.31	tf_idf_gradient_boosting
1045	1045	gradient_boosting	2.52786e+07	5027.78	0.4304	1.0966	3477.95	tf_idf_gradient_boosting
1046	1046	gradient_boosting	2.5183e+07	5018.27	0.4325	1.0962	3473.59	tf_idf_gradient_boosting
1047	1047	gradient_boosting	2.50967e+07	5009.66	0.4345	1.0959	3482.16	tf_idf_gradient_boosting
1048	1048	gradient_boosting	2.53667e+07	5036.54	0.4284	1.0969	3499.92	tf_idf_gradient_boosting
1049	1049	gradient_boosting	2.51568e+07	5015.66	0.4331	1.0961	3472.97	tf_idf_gradient_boosting
0	0	linear_regression	2.57607e+07	5075.5	-0.1667	1.1978	4109.03	tf_idf_linear_regression
1	1	linear_regression	2.57607e+07	5075.5	-0.1667	1.1978	4109.03	tf_idf_linear_regression
2	2	linear_regression	2.57607e+07	5075.5	-0.1667	1.1978	4109.03	tf_idf_linear_regression
3	3	linear_regression	2.57607e+07	5075.5	-0.1667	1.1978	4109.03	tf_idf_linear_regression
4	4	linear_regression	2.57607e+07	5075.5	-0.1667	1.1978	4109.03	tf_idf_linear_regression
5	5	linear_regression	2.57607e+07	5075.5	-0.1667	1.1978	4109.03	tf_idf_linear_regression
6	6	linear_regression	2.57607e+07	5075.5	-0.1667	1.1978	4109.03	tf_idf_linear_regression
7	7	linear_regression	2.57607e+07	5075.5	-0.1667	1.1978	4109.03	tf_idf_linear_regression
8	8	linear_regression	2.57607e+07	5075.5	-0.1667	1.1978	4109.03	tf_idf_linear_regression
9	9	linear_regression	2.57607e+07	5075.5	-0.1667	1.1978	4109.03	tf_idf_linear_regression
10	10	linear_regression	2.57607e+07	5075.5	-0.1667	1.1978	4109.03	tf_idf_linear_regression
11	11	linear_regression	2.57607e+07	5075.5	-0.1667	1.1978	4109.03	tf_idf_linear_regression
12	12	linear_regression	2.57607e+07	5075.5	-0.1667	1.1978	4109.03	tf_idf_linear_regression
13	13	linear_regression	2.57607e+07	5075.5	-0.1667	1.1978	4109.03	tf_idf_linear_regression
14	14	linear_regression	2.57607e+07	5075.5	-0.1667	1.1978	4109.03	tf_idf_linear_regression
15	15	linear_regression	2.57607e+07	5075.5	-0.1667	1.1978	4109.03	tf_idf_linear_regression
16	16	linear_regression	2.57607e+07	5075.5	-0.1667	1.1978	4109.03	tf_idf_linear_regression
17	17	linear_regression	2.57607e+07	5075.5	-0.1667	1.1978	4109.03	tf_idf_linear_regression
18	18	linear_regression	2.57607e+07	5075.5	-0.1667	1.1978	4109.03	tf_idf_linear_regression
19	19	linear_regression	2.57607e+07	5075.5	-0.1667	1.1978	4109.03	tf_idf_linear_regression
20	20	linear_regression	2.57607e+07	5075.5	-0.1667	1.1978	4109.03	tf_idf_linear_regression
21	21	linear_regression	2.57607e+07	5075.5	-0.1667	1.1978	4109.03	tf_idf_linear_regression
22	22	linear_regression	2.57607e+07	5075.5	-0.1667	1.1978	4109.03	tf_idf_linear_regression
23	23	linear_regression	2.57607e+07	5075.5	-0.1667	1.1978	4109.03	tf_idf_linear_regression
24	24	linear_regression	2.57607e+07	5075.5	-0.1667	1.1978	4109.03	tf_idf_linear_regression
25	25	linear_regression	2.57607e+07	5075.5	-0.1667	1.1978	4109.03	tf_idf_linear_regression
26	26	linear_regression	2.57607e+07	5075.5	-0.1667	1.1978	4109.03	tf_idf_linear_regression
27	27	linear_regression	2.57607e+07	5075.5	-0.1667	1.1978	4109.03	tf_idf_linear_regression
28	28	linear_regression	2.57607e+07	5075.5	-0.1667	1.1978	4109.03	tf_idf_linear_regression
29	29	linear_regression	2.57607e+07	5075.5	-0.1667	1.1978	4109.03	tf_idf_linear_regression
30	30	linear_regression	2.57607e+07	5075.5	-0.1667	1.1978	4109.03	tf_idf_linear_regression
31	31	linear_regression	2.57607e+07	5075.5	-0.1667	1.1978	4109.03	tf_idf_linear_regression
32	32	linear_regression	2.57607e+07	5075.5	-0.1667	1.1978	4109.03	tf_idf_linear_regression
33	33	linear_regression	2.57607e+07	5075.5	-0.1667	1.1978	4109.03	tf_idf_linear_regression
34	34	linear_regression	2.57607e+07	5075.5	-0.1667	1.1978	4109.03	tf_idf_linear_regression
35	35	linear_regression	2.57607e+07	5075.5	-0.1667	1.1978	4109.03	tf_idf_linear_regression
36	36	linear_regression	2.57607e+07	5075.5	-0.1667	1.1978	4109.03	tf_idf_linear_regression
37	37	linear_regression	2.57607e+07	5075.5	-0.1667	1.1978	4109.03	tf_idf_linear_regression
38	38	linear_regression	2.57607e+07	5075.5	-0.1667	1.1978	4109.03	tf_idf_linear_regression
39	39	linear_regression	2.57607e+07	5075.5	-0.1667	1.1978	4109.03	tf_idf_linear_regression
40	40	linear_regression	2.57607e+07	5075.5	-0.1667	1.1978	4109.03	tf_idf_linear_regression
41	41	linear_regression	2.57607e+07	5075.5	-0.1667	1.1978	4109.03	tf_idf_linear_regression
42	42	linear_regression	2.57607e+07	5075.5	-0.1667	1.1978	4109.03	tf_idf_linear_regression
43	43	linear_regression	2.57607e+07	5075.5	-0.1667	1.1978	4109.03	tf_idf_linear_regression
44	44	linear_regression	2.57607e+07	5075.5	-0.1667	1.1978	4109.03	tf_idf_linear_regression
45	45	linear_regression	2.57607e+07	5075.5	-0.1667	1.1978	4109.03	tf_idf_linear_regression
46	46	linear_regression	2.57607e+07	5075.5	-0.1667	1.1978	4109.03	tf_idf_linear_regression
47	47	linear_regression	2.57607e+07	5075.5	-0.1667	1.1978	4109.03	tf_idf_linear_regression
48	48	linear_regression	2.57607e+07	5075.5	-0.1667	1.1978	4109.03	tf_idf_linear_regression
49	49	linear_regression	2.57607e+07	5075.5	-0.1667	1.1978	4109.03	tf_idf_linear_regression
50	50	svr_linear	1.39485e+07	3734.76	0.3683	1.1071	2971.03	tf_idf_svr_linear
51	51	svr_linear	1.39485e+07	3734.76	0.3683	1.1071	2971.03	tf_idf_svr_linear
52	52	svr_linear	1.39485e+07	3734.76	0.3683	1.1071	2971.03	tf_idf_svr_linear
53	53	svr_linear	1.39485e+07	3734.76	0.3683	1.1071	2971.03	tf_idf_svr_linear
54	54	svr_linear	1.39485e+07	3734.76	0.3683	1.1071	2971.03	tf_idf_svr_linear
55	55	svr_linear	1.39485e+07	3734.76	0.3683	1.1071	2971.03	tf_idf_svr_linear
56	56	svr_linear	1.39485e+07	3734.76	0.3683	1.1071	2971.03	tf_idf_svr_linear
57	57	svr_linear	1.39485e+07	3734.76	0.3683	1.1071	2971.03	tf_idf_svr_linear
58	58	svr_linear	1.39485e+07	3734.76	0.3683	1.1071	2971.03	tf_idf_svr_linear
59	59	svr_linear	1.39485e+07	3734.76	0.3683	1.1071	2971.03	tf_idf_svr_linear
60	60	svr_linear	1.39485e+07	3734.76	0.3683	1.1071	2971.03	tf_idf_svr_linear
61	61	svr_linear	1.39485e+07	3734.76	0.3683	1.1071	2971.03	tf_idf_svr_linear
62	62	svr_linear	1.39485e+07	3734.76	0.3683	1.1071	2971.03	tf_idf_svr_linear
63	63	svr_linear	1.39485e+07	3734.76	0.3683	1.1071	2971.03	tf_idf_svr_linear
64	64	svr_linear	1.39485e+07	3734.76	0.3683	1.1071	2971.03	tf_idf_svr_linear
65	65	svr_linear	1.39485e+07	3734.76	0.3683	1.1071	2971.03	tf_idf_svr_linear
66	66	svr_linear	1.39485e+07	3734.76	0.3683	1.1071	2971.03	tf_idf_svr_linear
67	67	svr_linear	1.39485e+07	3734.76	0.3683	1.1071	2971.03	tf_idf_svr_linear
68	68	svr_linear	1.39485e+07	3734.76	0.3683	1.1071	2971.03	tf_idf_svr_linear
69	69	svr_linear	1.39485e+07	3734.76	0.3683	1.1071	2971.03	tf_idf_svr_linear
70	70	svr_linear	1.39485e+07	3734.76	0.3683	1.1071	2971.03	tf_idf_svr_linear
71	71	svr_linear	1.39485e+07	3734.76	0.3683	1.1071	2971.03	tf_idf_svr_linear
72	72	svr_linear	1.39485e+07	3734.76	0.3683	1.1071	2971.03	tf_idf_svr_linear
73	73	svr_linear	1.39485e+07	3734.76	0.3683	1.1071	2971.03	tf_idf_svr_linear
74	74	svr_linear	1.39485e+07	3734.76	0.3683	1.1071	2971.03	tf_idf_svr_linear
75	75	svr_linear	1.39485e+07	3734.76	0.3683	1.1071	2971.03	tf_idf_svr_linear
76	76	svr_linear	1.39485e+07	3734.76	0.3683	1.1071	2971.03	tf_idf_svr_linear
77	77	svr_linear	1.39485e+07	3734.76	0.3683	1.1071	2971.03	tf_idf_svr_linear
78	78	svr_linear	1.39485e+07	3734.76	0.3683	1.1071	2971.03	tf_idf_svr_linear
79	79	svr_linear	1.39485e+07	3734.76	0.3683	1.1071	2971.03	tf_idf_svr_linear
80	80	svr_linear	1.39485e+07	3734.76	0.3683	1.1071	2971.03	tf_idf_svr_linear
81	81	svr_linear	1.39485e+07	3734.76	0.3683	1.1071	2971.03	tf_idf_svr_linear
82	82	svr_linear	1.39485e+07	3734.76	0.3683	1.1071	2971.03	tf_idf_svr_linear
83	83	svr_linear	1.39485e+07	3734.76	0.3683	1.1071	2971.03	tf_idf_svr_linear
84	84	svr_linear	1.39485e+07	3734.76	0.3683	1.1071	2971.03	tf_idf_svr_linear
85	85	svr_linear	1.39485e+07	3734.76	0.3683	1.1071	2971.03	tf_idf_svr_linear
86	86	svr_linear	1.39485e+07	3734.76	0.3683	1.1071	2971.03	tf_idf_svr_linear
87	87	svr_linear	1.39485e+07	3734.76	0.3683	1.1071	2971.03	tf_idf_svr_linear
88	88	svr_linear	1.39485e+07	3734.76	0.3683	1.1071	2971.03	tf_idf_svr_linear
89	89	svr_linear	1.39485e+07	3734.76	0.3683	1.1071	2971.03	tf_idf_svr_linear
90	90	svr_linear	1.39485e+07	3734.76	0.3683	1.1071	2971.03	tf_idf_svr_linear
91	91	svr_linear	1.39485e+07	3734.76	0.3683	1.1071	2971.03	tf_idf_svr_linear
92	92	svr_linear	1.39485e+07	3734.76	0.3683	1.1071	2971.03	tf_idf_svr_linear
93	93	svr_linear	1.39485e+07	3734.76	0.3683	1.1071	2971.03	tf_idf_svr_linear
94	94	svr_linear	1.39485e+07	3734.76	0.3683	1.1071	2971.03	tf_idf_svr_linear
95	95	svr_linear	1.39485e+07	3734.76	0.3683	1.1071	2971.03	tf_idf_svr_linear
96	96	svr_linear	1.39485e+07	3734.76	0.3683	1.1071	2971.03	tf_idf_svr_linear
97	97	svr_linear	1.39485e+07	3734.76	0.3683	1.1071	2971.03	tf_idf_svr_linear
98	98	svr_linear	1.39485e+07	3734.76	0.3683	1.1071	2971.03	tf_idf_svr_linear
99	99	svr_linear	1.39485e+07	3734.76	0.3683	1.1071	2971.03	tf_idf_svr_linear
100	100	svr_poly_2	2.25232e+07	4745.86	-0.02	1.1729	3723.32	tf_idf_svr_poly_2
101	101	svr_poly_2	2.25232e+07	4745.86	-0.02	1.1729	3723.32	tf_idf_svr_poly_2
102	102	svr_poly_2	2.25232e+07	4745.86	-0.02	1.1729	3723.32	tf_idf_svr_poly_2
103	103	svr_poly_2	2.25232e+07	4745.86	-0.02	1.1729	3723.32	tf_idf_svr_poly_2
104	104	svr_poly_2	2.25232e+07	4745.86	-0.02	1.1729	3723.32	tf_idf_svr_poly_2
105	105	svr_poly_2	2.25232e+07	4745.86	-0.02	1.1729	3723.32	tf_idf_svr_poly_2
106	106	svr_poly_2	2.25232e+07	4745.86	-0.02	1.1729	3723.32	tf_idf_svr_poly_2
107	107	svr_poly_2	2.25232e+07	4745.86	-0.02	1.1729	3723.32	tf_idf_svr_poly_2
108	108	svr_poly_2	2.25232e+07	4745.86	-0.02	1.1729	3723.32	tf_idf_svr_poly_2
109	109	svr_poly_2	2.25232e+07	4745.86	-0.02	1.1729	3723.32	tf_idf_svr_poly_2
110	110	svr_poly_2	2.25232e+07	4745.86	-0.02	1.1729	3723.32	tf_idf_svr_poly_2
111	111	svr_poly_2	2.25232e+07	4745.86	-0.02	1.1729	3723.32	tf_idf_svr_poly_2
112	112	svr_poly_2	2.25232e+07	4745.86	-0.02	1.1729	3723.32	tf_idf_svr_poly_2
113	113	svr_poly_2	2.25232e+07	4745.86	-0.02	1.1729	3723.32	tf_idf_svr_poly_2
114	114	svr_poly_2	2.25232e+07	4745.86	-0.02	1.1729	3723.32	tf_idf_svr_poly_2
115	115	svr_poly_2	2.25232e+07	4745.86	-0.02	1.1729	3723.32	tf_idf_svr_poly_2
116	116	svr_poly_2	2.25232e+07	4745.86	-0.02	1.1729	3723.32	tf_idf_svr_poly_2
117	117	svr_poly_2	2.25232e+07	4745.86	-0.02	1.1729	3723.32	tf_idf_svr_poly_2
118	118	svr_poly_2	2.25232e+07	4745.86	-0.02	1.1729	3723.32	tf_idf_svr_poly_2
119	119	svr_poly_2	2.25232e+07	4745.86	-0.02	1.1729	3723.32	tf_idf_svr_poly_2
120	120	svr_poly_2	2.25232e+07	4745.86	-0.02	1.1729	3723.32	tf_idf_svr_poly_2
121	121	svr_poly_2	2.25232e+07	4745.86	-0.02	1.1729	3723.32	tf_idf_svr_poly_2
122	122	svr_poly_2	2.25232e+07	4745.86	-0.02	1.1729	3723.32	tf_idf_svr_poly_2
123	123	svr_poly_2	2.25232e+07	4745.86	-0.02	1.1729	3723.32	tf_idf_svr_poly_2
124	124	svr_poly_2	2.25232e+07	4745.86	-0.02	1.1729	3723.32	tf_idf_svr_poly_2
125	125	svr_poly_2	2.25232e+07	4745.86	-0.02	1.1729	3723.32	tf_idf_svr_poly_2
126	126	svr_poly_2	2.25232e+07	4745.86	-0.02	1.1729	3723.32	tf_idf_svr_poly_2
127	127	svr_poly_2	2.25232e+07	4745.86	-0.02	1.1729	3723.32	tf_idf_svr_poly_2
128	128	svr_poly_2	2.25232e+07	4745.86	-0.02	1.1729	3723.32	tf_idf_svr_poly_2
129	129	svr_poly_2	2.25232e+07	4745.86	-0.02	1.1729	3723.32	tf_idf_svr_poly_2
130	130	svr_poly_2	2.25232e+07	4745.86	-0.02	1.1729	3723.32	tf_idf_svr_poly_2
131	131	svr_poly_2	2.25232e+07	4745.86	-0.02	1.1729	3723.32	tf_idf_svr_poly_2
132	132	svr_poly_2	2.25232e+07	4745.86	-0.02	1.1729	3723.32	tf_idf_svr_poly_2
133	133	svr_poly_2	2.25232e+07	4745.86	-0.02	1.1729	3723.32	tf_idf_svr_poly_2
134	134	svr_poly_2	2.25232e+07	4745.86	-0.02	1.1729	3723.32	tf_idf_svr_poly_2
135	135	svr_poly_2	2.25232e+07	4745.86	-0.02	1.1729	3723.32	tf_idf_svr_poly_2
136	136	svr_poly_2	2.25232e+07	4745.86	-0.02	1.1729	3723.32	tf_idf_svr_poly_2
137	137	svr_poly_2	2.25232e+07	4745.86	-0.02	1.1729	3723.32	tf_idf_svr_poly_2
138	138	svr_poly_2	2.25232e+07	4745.86	-0.02	1.1729	3723.32	tf_idf_svr_poly_2
139	139	svr_poly_2	2.25232e+07	4745.86	-0.02	1.1729	3723.32	tf_idf_svr_poly_2
140	140	svr_poly_2	2.25232e+07	4745.86	-0.02	1.1729	3723.32	tf_idf_svr_poly_2
141	141	svr_poly_2	2.25232e+07	4745.86	-0.02	1.1729	3723.32	tf_idf_svr_poly_2
142	142	svr_poly_2	2.25232e+07	4745.86	-0.02	1.1729	3723.32	tf_idf_svr_poly_2
143	143	svr_poly_2	2.25232e+07	4745.86	-0.02	1.1729	3723.32	tf_idf_svr_poly_2
144	144	svr_poly_2	2.25232e+07	4745.86	-0.02	1.1729	3723.32	tf_idf_svr_poly_2
145	145	svr_poly_2	2.25232e+07	4745.86	-0.02	1.1729	3723.32	tf_idf_svr_poly_2
146	146	svr_poly_2	2.25232e+07	4745.86	-0.02	1.1729	3723.32	tf_idf_svr_poly_2
147	147	svr_poly_2	2.25232e+07	4745.86	-0.02	1.1729	3723.32	tf_idf_svr_poly_2
148	148	svr_poly_2	2.25232e+07	4745.86	-0.02	1.1729	3723.32	tf_idf_svr_poly_2
149	149	svr_poly_2	2.25232e+07	4745.86	-0.02	1.1729	3723.32	tf_idf_svr_poly_2
150	150	svr_poly_3	2.25076e+07	4744.22	-0.0193	1.1728	3722.43	tf_idf_svr_poly_3
151	151	svr_poly_3	2.25076e+07	4744.22	-0.0193	1.1728	3722.43	tf_idf_svr_poly_3
152	152	svr_poly_3	2.25076e+07	4744.22	-0.0193	1.1728	3722.43	tf_idf_svr_poly_3
153	153	svr_poly_3	2.25076e+07	4744.22	-0.0193	1.1728	3722.43	tf_idf_svr_poly_3
154	154	svr_poly_3	2.25076e+07	4744.22	-0.0193	1.1728	3722.43	tf_idf_svr_poly_3
155	155	svr_poly_3	2.25076e+07	4744.22	-0.0193	1.1728	3722.43	tf_idf_svr_poly_3
156	156	svr_poly_3	2.25076e+07	4744.22	-0.0193	1.1728	3722.43	tf_idf_svr_poly_3
157	157	svr_poly_3	2.25076e+07	4744.22	-0.0193	1.1728	3722.43	tf_idf_svr_poly_3
158	158	svr_poly_3	2.25076e+07	4744.22	-0.0193	1.1728	3722.43	tf_idf_svr_poly_3
159	159	svr_poly_3	2.25076e+07	4744.22	-0.0193	1.1728	3722.43	tf_idf_svr_poly_3
160	160	svr_poly_3	2.25076e+07	4744.22	-0.0193	1.1728	3722.43	tf_idf_svr_poly_3
161	161	svr_poly_3	2.25076e+07	4744.22	-0.0193	1.1728	3722.43	tf_idf_svr_poly_3
162	162	svr_poly_3	2.25076e+07	4744.22	-0.0193	1.1728	3722.43	tf_idf_svr_poly_3
163	163	svr_poly_3	2.25076e+07	4744.22	-0.0193	1.1728	3722.43	tf_idf_svr_poly_3
164	164	svr_poly_3	2.25076e+07	4744.22	-0.0193	1.1728	3722.43	tf_idf_svr_poly_3
165	165	svr_poly_3	2.25076e+07	4744.22	-0.0193	1.1728	3722.43	tf_idf_svr_poly_3
166	166	svr_poly_3	2.25076e+07	4744.22	-0.0193	1.1728	3722.43	tf_idf_svr_poly_3
167	167	svr_poly_3	2.25076e+07	4744.22	-0.0193	1.1728	3722.43	tf_idf_svr_poly_3
168	168	svr_poly_3	2.25076e+07	4744.22	-0.0193	1.1728	3722.43	tf_idf_svr_poly_3
169	169	svr_poly_3	2.25076e+07	4744.22	-0.0193	1.1728	3722.43	tf_idf_svr_poly_3
170	170	svr_poly_3	2.25076e+07	4744.22	-0.0193	1.1728	3722.43	tf_idf_svr_poly_3
171	171	svr_poly_3	2.25076e+07	4744.22	-0.0193	1.1728	3722.43	tf_idf_svr_poly_3
172	172	svr_poly_3	2.25076e+07	4744.22	-0.0193	1.1728	3722.43	tf_idf_svr_poly_3
173	173	svr_poly_3	2.25076e+07	4744.22	-0.0193	1.1728	3722.43	tf_idf_svr_poly_3
174	174	svr_poly_3	2.25076e+07	4744.22	-0.0193	1.1728	3722.43	tf_idf_svr_poly_3
175	175	svr_poly_3	2.25076e+07	4744.22	-0.0193	1.1728	3722.43	tf_idf_svr_poly_3
176	176	svr_poly_3	2.25076e+07	4744.22	-0.0193	1.1728	3722.43	tf_idf_svr_poly_3
177	177	svr_poly_3	2.25076e+07	4744.22	-0.0193	1.1728	3722.43	tf_idf_svr_poly_3
178	178	svr_poly_3	2.25076e+07	4744.22	-0.0193	1.1728	3722.43	tf_idf_svr_poly_3
179	179	svr_poly_3	2.25076e+07	4744.22	-0.0193	1.1728	3722.43	tf_idf_svr_poly_3
180	180	svr_poly_3	2.25076e+07	4744.22	-0.0193	1.1728	3722.43	tf_idf_svr_poly_3
181	181	svr_poly_3	2.25076e+07	4744.22	-0.0193	1.1728	3722.43	tf_idf_svr_poly_3
182	182	svr_poly_3	2.25076e+07	4744.22	-0.0193	1.1728	3722.43	tf_idf_svr_poly_3
183	183	svr_poly_3	2.25076e+07	4744.22	-0.0193	1.1728	3722.43	tf_idf_svr_poly_3
184	184	svr_poly_3	2.25076e+07	4744.22	-0.0193	1.1728	3722.43	tf_idf_svr_poly_3
185	185	svr_poly_3	2.25076e+07	4744.22	-0.0193	1.1728	3722.43	tf_idf_svr_poly_3
186	186	svr_poly_3	2.25076e+07	4744.22	-0.0193	1.1728	3722.43	tf_idf_svr_poly_3
187	187	svr_poly_3	2.25076e+07	4744.22	-0.0193	1.1728	3722.43	tf_idf_svr_poly_3
188	188	svr_poly_3	2.25076e+07	4744.22	-0.0193	1.1728	3722.43	tf_idf_svr_poly_3
189	189	svr_poly_3	2.25076e+07	4744.22	-0.0193	1.1728	3722.43	tf_idf_svr_poly_3
190	190	svr_poly_3	2.25076e+07	4744.22	-0.0193	1.1728	3722.43	tf_idf_svr_poly_3
191	191	svr_poly_3	2.25076e+07	4744.22	-0.0193	1.1728	3722.43	tf_idf_svr_poly_3
192	192	svr_poly_3	2.25076e+07	4744.22	-0.0193	1.1728	3722.43	tf_idf_svr_poly_3
193	193	svr_poly_3	2.25076e+07	4744.22	-0.0193	1.1728	3722.43	tf_idf_svr_poly_3
194	194	svr_poly_3	2.25076e+07	4744.22	-0.0193	1.1728	3722.43	tf_idf_svr_poly_3
195	195	svr_poly_3	2.25076e+07	4744.22	-0.0193	1.1728	3722.43	tf_idf_svr_poly_3
196	196	svr_poly_3	2.25076e+07	4744.22	-0.0193	1.1728	3722.43	tf_idf_svr_poly_3
197	197	svr_poly_3	2.25076e+07	4744.22	-0.0193	1.1728	3722.43	tf_idf_svr_poly_3
198	198	svr_poly_3	2.25076e+07	4744.22	-0.0193	1.1728	3722.43	tf_idf_svr_poly_3
199	199	svr_poly_3	2.25076e+07	4744.22	-0.0193	1.1728	3722.43	tf_idf_svr_poly_3
200	200	svr_poly_4	2.24575e+07	4738.93	-0.0171	1.1724	3720.85	tf_idf_svr_poly_4
201	201	svr_poly_4	2.24575e+07	4738.93	-0.0171	1.1724	3720.85	tf_idf_svr_poly_4
202	202	svr_poly_4	2.24575e+07	4738.93	-0.0171	1.1724	3720.85	tf_idf_svr_poly_4
203	203	svr_poly_4	2.24575e+07	4738.93	-0.0171	1.1724	3720.85	tf_idf_svr_poly_4
204	204	svr_poly_4	2.24575e+07	4738.93	-0.0171	1.1724	3720.85	tf_idf_svr_poly_4
205	205	svr_poly_4	2.24575e+07	4738.93	-0.0171	1.1724	3720.85	tf_idf_svr_poly_4
206	206	svr_poly_4	2.24575e+07	4738.93	-0.0171	1.1724	3720.85	tf_idf_svr_poly_4
207	207	svr_poly_4	2.24575e+07	4738.93	-0.0171	1.1724	3720.85	tf_idf_svr_poly_4
208	208	svr_poly_4	2.24575e+07	4738.93	-0.0171	1.1724	3720.85	tf_idf_svr_poly_4
209	209	svr_poly_4	2.24575e+07	4738.93	-0.0171	1.1724	3720.85	tf_idf_svr_poly_4
210	210	svr_poly_4	2.24575e+07	4738.93	-0.0171	1.1724	3720.85	tf_idf_svr_poly_4
211	211	svr_poly_4	2.24575e+07	4738.93	-0.0171	1.1724	3720.85	tf_idf_svr_poly_4
212	212	svr_poly_4	2.24575e+07	4738.93	-0.0171	1.1724	3720.85	tf_idf_svr_poly_4
213	213	svr_poly_4	2.24575e+07	4738.93	-0.0171	1.1724	3720.85	tf_idf_svr_poly_4
214	214	svr_poly_4	2.24575e+07	4738.93	-0.0171	1.1724	3720.85	tf_idf_svr_poly_4
215	215	svr_poly_4	2.24575e+07	4738.93	-0.0171	1.1724	3720.85	tf_idf_svr_poly_4
216	216	svr_poly_4	2.24575e+07	4738.93	-0.0171	1.1724	3720.85	tf_idf_svr_poly_4
217	217	svr_poly_4	2.24575e+07	4738.93	-0.0171	1.1724	3720.85	tf_idf_svr_poly_4
218	218	svr_poly_4	2.24575e+07	4738.93	-0.0171	1.1724	3720.85	tf_idf_svr_poly_4
219	219	svr_poly_4	2.24575e+07	4738.93	-0.0171	1.1724	3720.85	tf_idf_svr_poly_4
220	220	svr_poly_4	2.24575e+07	4738.93	-0.0171	1.1724	3720.85	tf_idf_svr_poly_4
221	221	svr_poly_4	2.24575e+07	4738.93	-0.0171	1.1724	3720.85	tf_idf_svr_poly_4
222	222	svr_poly_4	2.24575e+07	4738.93	-0.0171	1.1724	3720.85	tf_idf_svr_poly_4
223	223	svr_poly_4	2.24575e+07	4738.93	-0.0171	1.1724	3720.85	tf_idf_svr_poly_4
224	224	svr_poly_4	2.24575e+07	4738.93	-0.0171	1.1724	3720.85	tf_idf_svr_poly_4
225	225	svr_poly_4	2.24575e+07	4738.93	-0.0171	1.1724	3720.85	tf_idf_svr_poly_4
226	226	svr_poly_4	2.24575e+07	4738.93	-0.0171	1.1724	3720.85	tf_idf_svr_poly_4
227	227	svr_poly_4	2.24575e+07	4738.93	-0.0171	1.1724	3720.85	tf_idf_svr_poly_4
228	228	svr_poly_4	2.24575e+07	4738.93	-0.0171	1.1724	3720.85	tf_idf_svr_poly_4
229	229	svr_poly_4	2.24575e+07	4738.93	-0.0171	1.1724	3720.85	tf_idf_svr_poly_4
230	230	svr_poly_4	2.24575e+07	4738.93	-0.0171	1.1724	3720.85	tf_idf_svr_poly_4
231	231	svr_poly_4	2.24575e+07	4738.93	-0.0171	1.1724	3720.85	tf_idf_svr_poly_4
232	232	svr_poly_4	2.24575e+07	4738.93	-0.0171	1.1724	3720.85	tf_idf_svr_poly_4
233	233	svr_poly_4	2.24575e+07	4738.93	-0.0171	1.1724	3720.85	tf_idf_svr_poly_4
234	234	svr_poly_4	2.24575e+07	4738.93	-0.0171	1.1724	3720.85	tf_idf_svr_poly_4
235	235	svr_poly_4	2.24575e+07	4738.93	-0.0171	1.1724	3720.85	tf_idf_svr_poly_4
236	236	svr_poly_4	2.24575e+07	4738.93	-0.0171	1.1724	3720.85	tf_idf_svr_poly_4
237	237	svr_poly_4	2.24575e+07	4738.93	-0.0171	1.1724	3720.85	tf_idf_svr_poly_4
238	238	svr_poly_4	2.24575e+07	4738.93	-0.0171	1.1724	3720.85	tf_idf_svr_poly_4
239	239	svr_poly_4	2.24575e+07	4738.93	-0.0171	1.1724	3720.85	tf_idf_svr_poly_4
240	240	svr_poly_4	2.24575e+07	4738.93	-0.0171	1.1724	3720.85	tf_idf_svr_poly_4
241	241	svr_poly_4	2.24575e+07	4738.93	-0.0171	1.1724	3720.85	tf_idf_svr_poly_4
242	242	svr_poly_4	2.24575e+07	4738.93	-0.0171	1.1724	3720.85	tf_idf_svr_poly_4
243	243	svr_poly_4	2.24575e+07	4738.93	-0.0171	1.1724	3720.85	tf_idf_svr_poly_4
244	244	svr_poly_4	2.24575e+07	4738.93	-0.0171	1.1724	3720.85	tf_idf_svr_poly_4
245	245	svr_poly_4	2.24575e+07	4738.93	-0.0171	1.1724	3720.85	tf_idf_svr_poly_4
246	246	svr_poly_4	2.24575e+07	4738.93	-0.0171	1.1724	3720.85	tf_idf_svr_poly_4
247	247	svr_poly_4	2.24575e+07	4738.93	-0.0171	1.1724	3720.85	tf_idf_svr_poly_4
248	248	svr_poly_4	2.24575e+07	4738.93	-0.0171	1.1724	3720.85	tf_idf_svr_poly_4
249	249	svr_poly_4	2.24575e+07	4738.93	-0.0171	1.1724	3720.85	tf_idf_svr_poly_4
250	250	svr_poly_10	2.18255e+07	4671.77	0.0116	1.1676	3677.99	tf_idf_svr_poly_10
251	251	svr_poly_10	2.18255e+07	4671.77	0.0116	1.1676	3677.99	tf_idf_svr_poly_10
252	252	svr_poly_10	2.18255e+07	4671.77	0.0116	1.1676	3677.99	tf_idf_svr_poly_10
253	253	svr_poly_10	2.18255e+07	4671.77	0.0116	1.1676	3677.99	tf_idf_svr_poly_10
254	254	svr_poly_10	2.18255e+07	4671.77	0.0116	1.1676	3677.99	tf_idf_svr_poly_10
255	255	svr_poly_10	2.18255e+07	4671.77	0.0116	1.1676	3677.99	tf_idf_svr_poly_10
256	256	svr_poly_10	2.18255e+07	4671.77	0.0116	1.1676	3677.99	tf_idf_svr_poly_10
257	257	svr_poly_10	2.18255e+07	4671.77	0.0116	1.1676	3677.99	tf_idf_svr_poly_10
258	258	svr_poly_10	2.18255e+07	4671.77	0.0116	1.1676	3677.99	tf_idf_svr_poly_10
259	259	svr_poly_10	2.18255e+07	4671.77	0.0116	1.1676	3677.99	tf_idf_svr_poly_10
260	260	svr_poly_10	2.18255e+07	4671.77	0.0116	1.1676	3677.99	tf_idf_svr_poly_10
261	261	svr_poly_10	2.18255e+07	4671.77	0.0116	1.1676	3677.99	tf_idf_svr_poly_10
262	262	svr_poly_10	2.18255e+07	4671.77	0.0116	1.1676	3677.99	tf_idf_svr_poly_10
263	263	svr_poly_10	2.18255e+07	4671.77	0.0116	1.1676	3677.99	tf_idf_svr_poly_10
264	264	svr_poly_10	2.18255e+07	4671.77	0.0116	1.1676	3677.99	tf_idf_svr_poly_10
265	265	svr_poly_10	2.18255e+07	4671.77	0.0116	1.1676	3677.99	tf_idf_svr_poly_10
266	266	svr_poly_10	2.18255e+07	4671.77	0.0116	1.1676	3677.99	tf_idf_svr_poly_10
267	267	svr_poly_10	2.18255e+07	4671.77	0.0116	1.1676	3677.99	tf_idf_svr_poly_10
268	268	svr_poly_10	2.18255e+07	4671.77	0.0116	1.1676	3677.99	tf_idf_svr_poly_10
269	269	svr_poly_10	2.18255e+07	4671.77	0.0116	1.1676	3677.99	tf_idf_svr_poly_10
270	270	svr_poly_10	2.18255e+07	4671.77	0.0116	1.1676	3677.99	tf_idf_svr_poly_10
271	271	svr_poly_10	2.18255e+07	4671.77	0.0116	1.1676	3677.99	tf_idf_svr_poly_10
272	272	svr_poly_10	2.18255e+07	4671.77	0.0116	1.1676	3677.99	tf_idf_svr_poly_10
273	273	svr_poly_10	2.18255e+07	4671.77	0.0116	1.1676	3677.99	tf_idf_svr_poly_10
274	274	svr_poly_10	2.18255e+07	4671.77	0.0116	1.1676	3677.99	tf_idf_svr_poly_10
275	275	svr_poly_10	2.18255e+07	4671.77	0.0116	1.1676	3677.99	tf_idf_svr_poly_10
276	276	svr_poly_10	2.18255e+07	4671.77	0.0116	1.1676	3677.99	tf_idf_svr_poly_10
277	277	svr_poly_10	2.18255e+07	4671.77	0.0116	1.1676	3677.99	tf_idf_svr_poly_10
278	278	svr_poly_10	2.18255e+07	4671.77	0.0116	1.1676	3677.99	tf_idf_svr_poly_10
279	279	svr_poly_10	2.18255e+07	4671.77	0.0116	1.1676	3677.99	tf_idf_svr_poly_10
280	280	svr_poly_10	2.18255e+07	4671.77	0.0116	1.1676	3677.99	tf_idf_svr_poly_10
281	281	svr_poly_10	2.18255e+07	4671.77	0.0116	1.1676	3677.99	tf_idf_svr_poly_10
282	282	svr_poly_10	2.18255e+07	4671.77	0.0116	1.1676	3677.99	tf_idf_svr_poly_10
283	283	svr_poly_10	2.18255e+07	4671.77	0.0116	1.1676	3677.99	tf_idf_svr_poly_10
284	284	svr_poly_10	2.18255e+07	4671.77	0.0116	1.1676	3677.99	tf_idf_svr_poly_10
285	285	svr_poly_10	2.18255e+07	4671.77	0.0116	1.1676	3677.99	tf_idf_svr_poly_10
286	286	svr_poly_10	2.18255e+07	4671.77	0.0116	1.1676	3677.99	tf_idf_svr_poly_10
287	287	svr_poly_10	2.18255e+07	4671.77	0.0116	1.1676	3677.99	tf_idf_svr_poly_10
288	288	svr_poly_10	2.18255e+07	4671.77	0.0116	1.1676	3677.99	tf_idf_svr_poly_10
289	289	svr_poly_10	2.18255e+07	4671.77	0.0116	1.1676	3677.99	tf_idf_svr_poly_10
290	290	svr_poly_10	2.18255e+07	4671.77	0.0116	1.1676	3677.99	tf_idf_svr_poly_10
291	291	svr_poly_10	2.18255e+07	4671.77	0.0116	1.1676	3677.99	tf_idf_svr_poly_10
292	292	svr_poly_10	2.18255e+07	4671.77	0.0116	1.1676	3677.99	tf_idf_svr_poly_10
293	293	svr_poly_10	2.18255e+07	4671.77	0.0116	1.1676	3677.99	tf_idf_svr_poly_10
294	294	svr_poly_10	2.18255e+07	4671.77	0.0116	1.1676	3677.99	tf_idf_svr_poly_10
295	295	svr_poly_10	2.18255e+07	4671.77	0.0116	1.1676	3677.99	tf_idf_svr_poly_10
296	296	svr_poly_10	2.18255e+07	4671.77	0.0116	1.1676	3677.99	tf_idf_svr_poly_10
297	297	svr_poly_10	2.18255e+07	4671.77	0.0116	1.1676	3677.99	tf_idf_svr_poly_10
298	298	svr_poly_10	2.18255e+07	4671.77	0.0116	1.1676	3677.99	tf_idf_svr_poly_10
299	299	svr_poly_10	2.18255e+07	4671.77	0.0116	1.1676	3677.99	tf_idf_svr_poly_10
300	300	svr_poly_15	3.01454e+07	5490.48	-0.3652	1.2315	4096.22	tf_idf_svr_poly_15
301	301	svr_poly_15	3.01454e+07	5490.48	-0.3652	1.2315	4096.22	tf_idf_svr_poly_15
302	302	svr_poly_15	3.01454e+07	5490.48	-0.3652	1.2315	4096.22	tf_idf_svr_poly_15
303	303	svr_poly_15	3.01454e+07	5490.48	-0.3652	1.2315	4096.22	tf_idf_svr_poly_15
304	304	svr_poly_15	3.01454e+07	5490.48	-0.3652	1.2315	4096.22	tf_idf_svr_poly_15
305	305	svr_poly_15	3.01454e+07	5490.48	-0.3652	1.2315	4096.22	tf_idf_svr_poly_15
306	306	svr_poly_15	3.01454e+07	5490.48	-0.3652	1.2315	4096.22	tf_idf_svr_poly_15
307	307	svr_poly_15	3.01454e+07	5490.48	-0.3652	1.2315	4096.22	tf_idf_svr_poly_15
308	308	svr_poly_15	3.01454e+07	5490.48	-0.3652	1.2315	4096.22	tf_idf_svr_poly_15
309	309	svr_poly_15	3.01454e+07	5490.48	-0.3652	1.2315	4096.22	tf_idf_svr_poly_15
310	310	svr_poly_15	3.01454e+07	5490.48	-0.3652	1.2315	4096.22	tf_idf_svr_poly_15
311	311	svr_poly_15	3.01454e+07	5490.48	-0.3652	1.2315	4096.22	tf_idf_svr_poly_15
312	312	svr_poly_15	3.01454e+07	5490.48	-0.3652	1.2315	4096.22	tf_idf_svr_poly_15
313	313	svr_poly_15	3.01454e+07	5490.48	-0.3652	1.2315	4096.22	tf_idf_svr_poly_15
314	314	svr_poly_15	3.01454e+07	5490.48	-0.3652	1.2315	4096.22	tf_idf_svr_poly_15
315	315	svr_poly_15	3.01454e+07	5490.48	-0.3652	1.2315	4096.22	tf_idf_svr_poly_15
316	316	svr_poly_15	3.01454e+07	5490.48	-0.3652	1.2315	4096.22	tf_idf_svr_poly_15
317	317	svr_poly_15	3.01454e+07	5490.48	-0.3652	1.2315	4096.22	tf_idf_svr_poly_15
318	318	svr_poly_15	3.01454e+07	5490.48	-0.3652	1.2315	4096.22	tf_idf_svr_poly_15
319	319	svr_poly_15	3.01454e+07	5490.48	-0.3652	1.2315	4096.22	tf_idf_svr_poly_15
320	320	svr_poly_15	3.01454e+07	5490.48	-0.3652	1.2315	4096.22	tf_idf_svr_poly_15
321	321	svr_poly_15	3.01454e+07	5490.48	-0.3652	1.2315	4096.22	tf_idf_svr_poly_15
322	322	svr_poly_15	3.01454e+07	5490.48	-0.3652	1.2315	4096.22	tf_idf_svr_poly_15
323	323	svr_poly_15	3.01454e+07	5490.48	-0.3652	1.2315	4096.22	tf_idf_svr_poly_15
324	324	svr_poly_15	3.01454e+07	5490.48	-0.3652	1.2315	4096.22	tf_idf_svr_poly_15
325	325	svr_poly_15	3.01454e+07	5490.48	-0.3652	1.2315	4096.22	tf_idf_svr_poly_15
326	326	svr_poly_15	3.01454e+07	5490.48	-0.3652	1.2315	4096.22	tf_idf_svr_poly_15
327	327	svr_poly_15	3.01454e+07	5490.48	-0.3652	1.2315	4096.22	tf_idf_svr_poly_15
328	328	svr_poly_15	3.01454e+07	5490.48	-0.3652	1.2315	4096.22	tf_idf_svr_poly_15
329	329	svr_poly_15	3.01454e+07	5490.48	-0.3652	1.2315	4096.22	tf_idf_svr_poly_15
330	330	svr_poly_15	3.01454e+07	5490.48	-0.3652	1.2315	4096.22	tf_idf_svr_poly_15
331	331	svr_poly_15	3.01454e+07	5490.48	-0.3652	1.2315	4096.22	tf_idf_svr_poly_15
332	332	svr_poly_15	3.01454e+07	5490.48	-0.3652	1.2315	4096.22	tf_idf_svr_poly_15
333	333	svr_poly_15	3.01454e+07	5490.48	-0.3652	1.2315	4096.22	tf_idf_svr_poly_15
334	334	svr_poly_15	3.01454e+07	5490.48	-0.3652	1.2315	4096.22	tf_idf_svr_poly_15
335	335	svr_poly_15	3.01454e+07	5490.48	-0.3652	1.2315	4096.22	tf_idf_svr_poly_15
336	336	svr_poly_15	3.01454e+07	5490.48	-0.3652	1.2315	4096.22	tf_idf_svr_poly_15
337	337	svr_poly_15	3.01454e+07	5490.48	-0.3652	1.2315	4096.22	tf_idf_svr_poly_15
338	338	svr_poly_15	3.01454e+07	5490.48	-0.3652	1.2315	4096.22	tf_idf_svr_poly_15
339	339	svr_poly_15	3.01454e+07	5490.48	-0.3652	1.2315	4096.22	tf_idf_svr_poly_15
340	340	svr_poly_15	3.01454e+07	5490.48	-0.3652	1.2315	4096.22	tf_idf_svr_poly_15
341	341	svr_poly_15	3.01454e+07	5490.48	-0.3652	1.2315	4096.22	tf_idf_svr_poly_15
342	342	svr_poly_15	3.01454e+07	5490.48	-0.3652	1.2315	4096.22	tf_idf_svr_poly_15
343	343	svr_poly_15	3.01454e+07	5490.48	-0.3652	1.2315	4096.22	tf_idf_svr_poly_15
344	344	svr_poly_15	3.01454e+07	5490.48	-0.3652	1.2315	4096.22	tf_idf_svr_poly_15
345	345	svr_poly_15	3.01454e+07	5490.48	-0.3652	1.2315	4096.22	tf_idf_svr_poly_15
346	346	svr_poly_15	3.01454e+07	5490.48	-0.3652	1.2315	4096.22	tf_idf_svr_poly_15
347	347	svr_poly_15	3.01454e+07	5490.48	-0.3652	1.2315	4096.22	tf_idf_svr_poly_15
348	348	svr_poly_15	3.01454e+07	5490.48	-0.3652	1.2315	4096.22	tf_idf_svr_poly_15
349	349	svr_poly_15	3.01454e+07	5490.48	-0.3652	1.2315	4096.22	tf_idf_svr_poly_15
350	350	svr_rbf	2.25506e+07	4748.75	-0.0213	1.1732	3723.82	tf_idf_svr_rbf
351	351	svr_rbf	2.25506e+07	4748.75	-0.0213	1.1732	3723.82	tf_idf_svr_rbf
352	352	svr_rbf	2.25506e+07	4748.75	-0.0213	1.1732	3723.82	tf_idf_svr_rbf
353	353	svr_rbf	2.25506e+07	4748.75	-0.0213	1.1732	3723.82	tf_idf_svr_rbf
354	354	svr_rbf	2.25506e+07	4748.75	-0.0213	1.1732	3723.82	tf_idf_svr_rbf
355	355	svr_rbf	2.25506e+07	4748.75	-0.0213	1.1732	3723.82	tf_idf_svr_rbf
356	356	svr_rbf	2.25506e+07	4748.75	-0.0213	1.1732	3723.82	tf_idf_svr_rbf
357	357	svr_rbf	2.25506e+07	4748.75	-0.0213	1.1732	3723.82	tf_idf_svr_rbf
358	358	svr_rbf	2.25506e+07	4748.75	-0.0213	1.1732	3723.82	tf_idf_svr_rbf
359	359	svr_rbf	2.25506e+07	4748.75	-0.0213	1.1732	3723.82	tf_idf_svr_rbf
360	360	svr_rbf	2.25506e+07	4748.75	-0.0213	1.1732	3723.82	tf_idf_svr_rbf
361	361	svr_rbf	2.25506e+07	4748.75	-0.0213	1.1732	3723.82	tf_idf_svr_rbf
362	362	svr_rbf	2.25506e+07	4748.75	-0.0213	1.1732	3723.82	tf_idf_svr_rbf
363	363	svr_rbf	2.25506e+07	4748.75	-0.0213	1.1732	3723.82	tf_idf_svr_rbf
364	364	svr_rbf	2.25506e+07	4748.75	-0.0213	1.1732	3723.82	tf_idf_svr_rbf
365	365	svr_rbf	2.25506e+07	4748.75	-0.0213	1.1732	3723.82	tf_idf_svr_rbf
366	366	svr_rbf	2.25506e+07	4748.75	-0.0213	1.1732	3723.82	tf_idf_svr_rbf
367	367	svr_rbf	2.25506e+07	4748.75	-0.0213	1.1732	3723.82	tf_idf_svr_rbf
368	368	svr_rbf	2.25506e+07	4748.75	-0.0213	1.1732	3723.82	tf_idf_svr_rbf
369	369	svr_rbf	2.25506e+07	4748.75	-0.0213	1.1732	3723.82	tf_idf_svr_rbf
370	370	svr_rbf	2.25506e+07	4748.75	-0.0213	1.1732	3723.82	tf_idf_svr_rbf
371	371	svr_rbf	2.25506e+07	4748.75	-0.0213	1.1732	3723.82	tf_idf_svr_rbf
372	372	svr_rbf	2.25506e+07	4748.75	-0.0213	1.1732	3723.82	tf_idf_svr_rbf
373	373	svr_rbf	2.25506e+07	4748.75	-0.0213	1.1732	3723.82	tf_idf_svr_rbf
374	374	svr_rbf	2.25506e+07	4748.75	-0.0213	1.1732	3723.82	tf_idf_svr_rbf
375	375	svr_rbf	2.25506e+07	4748.75	-0.0213	1.1732	3723.82	tf_idf_svr_rbf
376	376	svr_rbf	2.25506e+07	4748.75	-0.0213	1.1732	3723.82	tf_idf_svr_rbf
377	377	svr_rbf	2.25506e+07	4748.75	-0.0213	1.1732	3723.82	tf_idf_svr_rbf
378	378	svr_rbf	2.25506e+07	4748.75	-0.0213	1.1732	3723.82	tf_idf_svr_rbf
379	379	svr_rbf	2.25506e+07	4748.75	-0.0213	1.1732	3723.82	tf_idf_svr_rbf
380	380	svr_rbf	2.25506e+07	4748.75	-0.0213	1.1732	3723.82	tf_idf_svr_rbf
381	381	svr_rbf	2.25506e+07	4748.75	-0.0213	1.1732	3723.82	tf_idf_svr_rbf
382	382	svr_rbf	2.25506e+07	4748.75	-0.0213	1.1732	3723.82	tf_idf_svr_rbf
383	383	svr_rbf	2.25506e+07	4748.75	-0.0213	1.1732	3723.82	tf_idf_svr_rbf
384	384	svr_rbf	2.25506e+07	4748.75	-0.0213	1.1732	3723.82	tf_idf_svr_rbf
385	385	svr_rbf	2.25506e+07	4748.75	-0.0213	1.1732	3723.82	tf_idf_svr_rbf
386	386	svr_rbf	2.25506e+07	4748.75	-0.0213	1.1732	3723.82	tf_idf_svr_rbf
387	387	svr_rbf	2.25506e+07	4748.75	-0.0213	1.1732	3723.82	tf_idf_svr_rbf
388	388	svr_rbf	2.25506e+07	4748.75	-0.0213	1.1732	3723.82	tf_idf_svr_rbf
389	389	svr_rbf	2.25506e+07	4748.75	-0.0213	1.1732	3723.82	tf_idf_svr_rbf
390	390	svr_rbf	2.25506e+07	4748.75	-0.0213	1.1732	3723.82	tf_idf_svr_rbf
391	391	svr_rbf	2.25506e+07	4748.75	-0.0213	1.1732	3723.82	tf_idf_svr_rbf
392	392	svr_rbf	2.25506e+07	4748.75	-0.0213	1.1732	3723.82	tf_idf_svr_rbf
393	393	svr_rbf	2.25506e+07	4748.75	-0.0213	1.1732	3723.82	tf_idf_svr_rbf
394	394	svr_rbf	2.25506e+07	4748.75	-0.0213	1.1732	3723.82	tf_idf_svr_rbf
395	395	svr_rbf	2.25506e+07	4748.75	-0.0213	1.1732	3723.82	tf_idf_svr_rbf
396	396	svr_rbf	2.25506e+07	4748.75	-0.0213	1.1732	3723.82	tf_idf_svr_rbf
397	397	svr_rbf	2.25506e+07	4748.75	-0.0213	1.1732	3723.82	tf_idf_svr_rbf
398	398	svr_rbf	2.25506e+07	4748.75	-0.0213	1.1732	3723.82	tf_idf_svr_rbf
399	399	svr_rbf	2.25506e+07	4748.75	-0.0213	1.1732	3723.82	tf_idf_svr_rbf
400	400	svr_sigmoid	2.25575e+07	4749.48	-0.0216	1.1732	3724.16	tf_idf_svr_sigmoid
401	401	svr_sigmoid	2.25575e+07	4749.48	-0.0216	1.1732	3724.16	tf_idf_svr_sigmoid
402	402	svr_sigmoid	2.25575e+07	4749.48	-0.0216	1.1732	3724.16	tf_idf_svr_sigmoid
403	403	svr_sigmoid	2.25575e+07	4749.48	-0.0216	1.1732	3724.16	tf_idf_svr_sigmoid
404	404	svr_sigmoid	2.25575e+07	4749.48	-0.0216	1.1732	3724.16	tf_idf_svr_sigmoid
405	405	svr_sigmoid	2.25575e+07	4749.48	-0.0216	1.1732	3724.16	tf_idf_svr_sigmoid
406	406	svr_sigmoid	2.25575e+07	4749.48	-0.0216	1.1732	3724.16	tf_idf_svr_sigmoid
407	407	svr_sigmoid	2.25575e+07	4749.48	-0.0216	1.1732	3724.16	tf_idf_svr_sigmoid
408	408	svr_sigmoid	2.25575e+07	4749.48	-0.0216	1.1732	3724.16	tf_idf_svr_sigmoid
409	409	svr_sigmoid	2.25575e+07	4749.48	-0.0216	1.1732	3724.16	tf_idf_svr_sigmoid
410	410	svr_sigmoid	2.25575e+07	4749.48	-0.0216	1.1732	3724.16	tf_idf_svr_sigmoid
411	411	svr_sigmoid	2.25575e+07	4749.48	-0.0216	1.1732	3724.16	tf_idf_svr_sigmoid
412	412	svr_sigmoid	2.25575e+07	4749.48	-0.0216	1.1732	3724.16	tf_idf_svr_sigmoid
413	413	svr_sigmoid	2.25575e+07	4749.48	-0.0216	1.1732	3724.16	tf_idf_svr_sigmoid
414	414	svr_sigmoid	2.25575e+07	4749.48	-0.0216	1.1732	3724.16	tf_idf_svr_sigmoid
415	415	svr_sigmoid	2.25575e+07	4749.48	-0.0216	1.1732	3724.16	tf_idf_svr_sigmoid
416	416	svr_sigmoid	2.25575e+07	4749.48	-0.0216	1.1732	3724.16	tf_idf_svr_sigmoid
417	417	svr_sigmoid	2.25575e+07	4749.48	-0.0216	1.1732	3724.16	tf_idf_svr_sigmoid
418	418	svr_sigmoid	2.25575e+07	4749.48	-0.0216	1.1732	3724.16	tf_idf_svr_sigmoid
419	419	svr_sigmoid	2.25575e+07	4749.48	-0.0216	1.1732	3724.16	tf_idf_svr_sigmoid
420	420	svr_sigmoid	2.25575e+07	4749.48	-0.0216	1.1732	3724.16	tf_idf_svr_sigmoid
421	421	svr_sigmoid	2.25575e+07	4749.48	-0.0216	1.1732	3724.16	tf_idf_svr_sigmoid
422	422	svr_sigmoid	2.25575e+07	4749.48	-0.0216	1.1732	3724.16	tf_idf_svr_sigmoid
423	423	svr_sigmoid	2.25575e+07	4749.48	-0.0216	1.1732	3724.16	tf_idf_svr_sigmoid
424	424	svr_sigmoid	2.25575e+07	4749.48	-0.0216	1.1732	3724.16	tf_idf_svr_sigmoid
425	425	svr_sigmoid	2.25575e+07	4749.48	-0.0216	1.1732	3724.16	tf_idf_svr_sigmoid
426	426	svr_sigmoid	2.25575e+07	4749.48	-0.0216	1.1732	3724.16	tf_idf_svr_sigmoid
427	427	svr_sigmoid	2.25575e+07	4749.48	-0.0216	1.1732	3724.16	tf_idf_svr_sigmoid
428	428	svr_sigmoid	2.25575e+07	4749.48	-0.0216	1.1732	3724.16	tf_idf_svr_sigmoid
429	429	svr_sigmoid	2.25575e+07	4749.48	-0.0216	1.1732	3724.16	tf_idf_svr_sigmoid
430	430	svr_sigmoid	2.25575e+07	4749.48	-0.0216	1.1732	3724.16	tf_idf_svr_sigmoid
431	431	svr_sigmoid	2.25575e+07	4749.48	-0.0216	1.1732	3724.16	tf_idf_svr_sigmoid
432	432	svr_sigmoid	2.25575e+07	4749.48	-0.0216	1.1732	3724.16	tf_idf_svr_sigmoid
433	433	svr_sigmoid	2.25575e+07	4749.48	-0.0216	1.1732	3724.16	tf_idf_svr_sigmoid
434	434	svr_sigmoid	2.25575e+07	4749.48	-0.0216	1.1732	3724.16	tf_idf_svr_sigmoid
435	435	svr_sigmoid	2.25575e+07	4749.48	-0.0216	1.1732	3724.16	tf_idf_svr_sigmoid
436	436	svr_sigmoid	2.25575e+07	4749.48	-0.0216	1.1732	3724.16	tf_idf_svr_sigmoid
437	437	svr_sigmoid	2.25575e+07	4749.48	-0.0216	1.1732	3724.16	tf_idf_svr_sigmoid
438	438	svr_sigmoid	2.25575e+07	4749.48	-0.0216	1.1732	3724.16	tf_idf_svr_sigmoid
439	439	svr_sigmoid	2.25575e+07	4749.48	-0.0216	1.1732	3724.16	tf_idf_svr_sigmoid
440	440	svr_sigmoid	2.25575e+07	4749.48	-0.0216	1.1732	3724.16	tf_idf_svr_sigmoid
441	441	svr_sigmoid	2.25575e+07	4749.48	-0.0216	1.1732	3724.16	tf_idf_svr_sigmoid
442	442	svr_sigmoid	2.25575e+07	4749.48	-0.0216	1.1732	3724.16	tf_idf_svr_sigmoid
443	443	svr_sigmoid	2.25575e+07	4749.48	-0.0216	1.1732	3724.16	tf_idf_svr_sigmoid
444	444	svr_sigmoid	2.25575e+07	4749.48	-0.0216	1.1732	3724.16	tf_idf_svr_sigmoid
445	445	svr_sigmoid	2.25575e+07	4749.48	-0.0216	1.1732	3724.16	tf_idf_svr_sigmoid
446	446	svr_sigmoid	2.25575e+07	4749.48	-0.0216	1.1732	3724.16	tf_idf_svr_sigmoid
447	447	svr_sigmoid	2.25575e+07	4749.48	-0.0216	1.1732	3724.16	tf_idf_svr_sigmoid
448	448	svr_sigmoid	2.25575e+07	4749.48	-0.0216	1.1732	3724.16	tf_idf_svr_sigmoid
449	449	svr_sigmoid	2.25575e+07	4749.48	-0.0216	1.1732	3724.16	tf_idf_svr_sigmoid
450	450	random_forest_10	1.46688e+07	3829.99	0.3357	1.1126	2962.36	tf_idf_random_forest_10
451	451	random_forest_10	1.31789e+07	3630.27	0.4032	1.1012	2914.74	tf_idf_random_forest_10
452	452	random_forest_10	1.63978e+07	4049.42	0.2574	1.1259	3055.01	tf_idf_random_forest_10
453	453	random_forest_10	1.13678e+07	3371.61	0.4852	1.0873	2586.42	tf_idf_random_forest_10
454	454	random_forest_10	1.41836e+07	3766.12	0.3577	1.1089	2992.15	tf_idf_random_forest_10
455	455	random_forest_10	1.38366e+07	3719.75	0.3734	1.1062	2892.04	tf_idf_random_forest_10
456	456	random_forest_10	1.73605e+07	4166.59	0.2138	1.1333	3393.58	tf_idf_random_forest_10
457	457	random_forest_10	1.25767e+07	3546.37	0.4304	1.0966	2842.71	tf_idf_random_forest_10
458	458	random_forest_10	1.59186e+07	3989.81	0.2791	1.1222	3148.89	tf_idf_random_forest_10
459	459	random_forest_10	1.18653e+07	3444.61	0.4626	1.0911	2751.96	tf_idf_random_forest_10
460	460	random_forest_10	1.41615e+07	3763.17	0.3587	1.1087	2932.09	tf_idf_random_forest_10
461	461	random_forest_10	1.41417e+07	3760.54	0.3596	1.1086	3001.31	tf_idf_random_forest_10
462	462	random_forest_10	1.54299e+07	3928.09	0.3012	1.1185	3182.91	tf_idf_random_forest_10
463	463	random_forest_10	1.48446e+07	3852.86	0.3277	1.114	3079.68	tf_idf_random_forest_10
464	464	random_forest_10	1.61671e+07	4020.83	0.2678	1.1241	3299.25	tf_idf_random_forest_10
465	465	random_forest_10	1.17527e+07	3428.22	0.4677	1.0902	2778.82	tf_idf_random_forest_10
466	466	random_forest_10	1.38611e+07	3723.06	0.3723	1.1064	2913.89	tf_idf_random_forest_10
467	467	random_forest_10	1.46942e+07	3833.3	0.3345	1.1128	3010.24	tf_idf_random_forest_10
468	468	random_forest_10	1.40826e+07	3752.69	0.3622	1.1081	2944.27	tf_idf_random_forest_10
469	469	random_forest_10	1.36036e+07	3688.31	0.3839	1.1045	2851.12	tf_idf_random_forest_10
470	470	random_forest_10	1.32256e+07	3636.71	0.401	1.1016	2836.07	tf_idf_random_forest_10
471	471	random_forest_10	1.42857e+07	3779.64	0.353	1.1097	2967.53	tf_idf_random_forest_10
472	472	random_forest_10	1.22867e+07	3505.25	0.4436	1.0943	2674.71	tf_idf_random_forest_10
473	473	random_forest_10	1.39959e+07	3741.11	0.3662	1.1075	3009.54	tf_idf_random_forest_10
474	474	random_forest_10	1.5589e+07	3948.29	0.294	1.1197	3084.54	tf_idf_random_forest_10
475	475	random_forest_10	1.46425e+07	3826.55	0.3369	1.1124	2949.8	tf_idf_random_forest_10
476	476	random_forest_10	1.33856e+07	3658.63	0.3938	1.1028	2793.03	tf_idf_random_forest_10
477	477	random_forest_10	1.20981e+07	3478.23	0.4521	1.0929	2654.75	tf_idf_random_forest_10
478	478	random_forest_10	1.41357e+07	3759.75	0.3598	1.1085	2867.14	tf_idf_random_forest_10
479	479	random_forest_10	1.20003e+07	3464.15	0.4565	1.0921	2806.17	tf_idf_random_forest_10
480	480	random_forest_10	1.40832e+07	3752.76	0.3622	1.1081	2940.68	tf_idf_random_forest_10
481	481	random_forest_10	1.36345e+07	3692.5	0.3825	1.1047	2908.23	tf_idf_random_forest_10
482	482	random_forest_10	1.62047e+07	4025.51	0.2661	1.1244	3087.64	tf_idf_random_forest_10
483	483	random_forest_10	1.38094e+07	3716.1	0.3746	1.106	2970.18	tf_idf_random_forest_10
484	484	random_forest_10	1.2975e+07	3602.08	0.4124	1.0996	2785.87	tf_idf_random_forest_10
485	485	random_forest_10	1.35729e+07	3684.15	0.3853	1.1042	2792.8	tf_idf_random_forest_10
486	486	random_forest_10	1.49277e+07	3863.64	0.324	1.1146	2995.82	tf_idf_random_forest_10
487	487	random_forest_10	1.69559e+07	4117.76	0.2321	1.1302	3261.91	tf_idf_random_forest_10
488	488	random_forest_10	1.57752e+07	3971.8	0.2856	1.1211	3071.88	tf_idf_random_forest_10
489	489	random_forest_10	1.35197e+07	3676.91	0.3877	1.1038	2907.11	tf_idf_random_forest_10
490	490	random_forest_10	1.45945e+07	3820.28	0.339	1.1121	3047.16	tf_idf_random_forest_10
491	491	random_forest_10	1.51938e+07	3897.92	0.3119	1.1167	3060.49	tf_idf_random_forest_10
492	492	random_forest_10	1.42727e+07	3777.93	0.3536	1.1096	2944.93	tf_idf_random_forest_10
493	493	random_forest_10	1.36878e+07	3699.7	0.3801	1.1051	2975.61	tf_idf_random_forest_10
494	494	random_forest_10	1.24712e+07	3531.46	0.4352	1.0958	2801.27	tf_idf_random_forest_10
495	495	random_forest_10	1.62272e+07	4028.3	0.2651	1.1246	3162.69	tf_idf_random_forest_10
496	496	random_forest_10	1.55714e+07	3946.06	0.2948	1.1196	3094.55	tf_idf_random_forest_10
497	497	random_forest_10	1.41133e+07	3756.77	0.3608	1.1084	2891.17	tf_idf_random_forest_10
498	498	random_forest_10	1.227e+07	3502.86	0.4443	1.0942	2754.71	tf_idf_random_forest_10
499	499	random_forest_10	1.52686e+07	3907.51	0.3085	1.1172	3106.93	tf_idf_random_forest_10
500	500	random_forest_50	1.16348e+07	3410.99	0.4731	1.0893	2763.82	tf_idf_random_forest_50
501	501	random_forest_50	1.10412e+07	3322.82	0.5	1.0848	2712.53	tf_idf_random_forest_50
502	502	random_forest_50	1.07148e+07	3273.35	0.5147	1.0823	2652.67	tf_idf_random_forest_50
503	503	random_forest_50	1.10971e+07	3331.22	0.4974	1.0852	2709.37	tf_idf_random_forest_50
504	504	random_forest_50	1.12666e+07	3356.58	0.4898	1.0865	2726.08	tf_idf_random_forest_50
505	505	random_forest_50	1.18486e+07	3442.18	0.4634	1.091	2840.78	tf_idf_random_forest_50
506	506	random_forest_50	1.23255e+07	3510.77	0.4418	1.0946	2890.89	tf_idf_random_forest_50
507	507	random_forest_50	1.17491e+07	3427.7	0.4679	1.0902	2750.72	tf_idf_random_forest_50
508	508	random_forest_50	1.23002e+07	3507.17	0.4429	1.0944	2885.47	tf_idf_random_forest_50
509	509	random_forest_50	1.17558e+07	3428.67	0.4676	1.0903	2775.51	tf_idf_random_forest_50
510	510	random_forest_50	1.12064e+07	3347.6	0.4925	1.086	2769.26	tf_idf_random_forest_50
511	511	random_forest_50	1.11433e+07	3338.16	0.4953	1.0856	2724.77	tf_idf_random_forest_50
512	512	random_forest_50	1.05825e+07	3253.07	0.5207	1.0813	2652.22	tf_idf_random_forest_50
513	513	random_forest_50	11692569	3419.44	0.4705	1.0898	2799.3	tf_idf_random_forest_50
514	514	random_forest_50	1.11797e+07	3343.61	0.4937	1.0858	2716.81	tf_idf_random_forest_50
515	515	random_forest_50	1.19106e+07	3451.18	0.4606	1.0915	2851.53	tf_idf_random_forest_50
516	516	random_forest_50	1.11322e+07	3336.49	0.4958	1.0855	2721.89	tf_idf_random_forest_50
517	517	random_forest_50	1.0598e+07	3255.46	0.52	1.0814	2631.42	tf_idf_random_forest_50
518	518	random_forest_50	1.19505e+07	3456.95	0.4588	1.0918	2778.09	tf_idf_random_forest_50
519	519	random_forest_50	1.14279e+07	3380.51	0.4825	1.0877	2745.44	tf_idf_random_forest_50
520	520	random_forest_50	1.13043e+07	3362.19	0.4881	1.0868	2706.89	tf_idf_random_forest_50
521	521	random_forest_50	1.1539e+07	3396.91	0.4774	1.0886	2792.49	tf_idf_random_forest_50
522	522	random_forest_50	1.03641e+07	3219.33	0.5306	1.0796	2656.85	tf_idf_random_forest_50
523	523	random_forest_50	1.05245e+07	3244.15	0.5234	1.0808	2609.24	tf_idf_random_forest_50
524	524	random_forest_50	1.16821e+07	3417.9	0.4709	1.0897	2776.48	tf_idf_random_forest_50
525	525	random_forest_50	1.13275e+07	3365.63	0.487	1.087	2765.16	tf_idf_random_forest_50
526	526	random_forest_50	1.044e+07	3231.1	0.5272	1.0802	2663.93	tf_idf_random_forest_50
527	527	random_forest_50	1.20197e+07	3466.94	0.4557	1.0923	2828.7	tf_idf_random_forest_50
528	528	random_forest_50	1.16949e+07	3419.79	0.4704	1.0898	2789.71	tf_idf_random_forest_50
529	529	random_forest_50	1.17092e+07	3421.87	0.4697	1.0899	2783.46	tf_idf_random_forest_50
530	530	random_forest_50	1.08855e+07	3299.31	0.507	1.0836	2707.56	tf_idf_random_forest_50
531	531	random_forest_50	1.04474e+07	3232.24	0.5269	1.0802	2652.79	tf_idf_random_forest_50
532	532	random_forest_50	1.19906e+07	3462.75	0.457	1.0921	2791.07	tf_idf_random_forest_50
533	533	random_forest_50	1.06603e+07	3265.02	0.5172	1.0819	2698.81	tf_idf_random_forest_50
534	534	random_forest_50	1.13072e+07	3362.62	0.4879	1.0868	2763.36	tf_idf_random_forest_50
535	535	random_forest_50	1.17926e+07	3434.03	0.4659	1.0905	2823.59	tf_idf_random_forest_50
536	536	random_forest_50	1.11852e+07	3344.43	0.4934	1.0859	2745.71	tf_idf_random_forest_50
537	537	random_forest_50	1.25917e+07	3548.48	0.4297	1.0967	2928.83	tf_idf_random_forest_50
538	538	random_forest_50	1.13669e+07	3371.48	0.4852	1.0873	2779.9	tf_idf_random_forest_50
539	539	random_forest_50	1.15428e+07	3397.47	0.4772	1.0886	2796.87	tf_idf_random_forest_50
540	540	random_forest_50	1.11364e+07	3337.13	0.4957	1.0855	2723.9	tf_idf_random_forest_50
541	541	random_forest_50	1.20087e+07	3465.36	0.4561	1.0922	2793.46	tf_idf_random_forest_50
542	542	random_forest_50	1.06023e+07	3256.12	0.5198	1.0814	2692.19	tf_idf_random_forest_50
543	543	random_forest_50	1.04724e+07	3236.11	0.5257	1.0804	2639.6	tf_idf_random_forest_50
544	544	random_forest_50	1.16954e+07	3419.85	0.4703	1.0898	2757.26	tf_idf_random_forest_50
545	545	random_forest_50	1.14242e+07	3379.97	0.4826	1.0877	2721.4	tf_idf_random_forest_50
546	546	random_forest_50	1.13388e+07	3367.31	0.4865	1.0871	2726.85	tf_idf_random_forest_50
547	547	random_forest_50	1.05895e+07	3254.15	0.5204	1.0813	2673.64	tf_idf_random_forest_50
548	548	random_forest_50	1.1507e+07	3392.2	0.4789	1.0884	2790.9	tf_idf_random_forest_50
549	549	random_forest_50	1.13835e+07	3373.95	0.4845	1.0874	2787.9	tf_idf_random_forest_50
550	550	random_forest_100	1.08914e+07	3300.2	0.5068	1.0836	2740.49	tf_idf_random_forest_100
551	551	random_forest_100	1.09177e+07	3304.19	0.5056	1.0838	2709.68	tf_idf_random_forest_100
552	552	random_forest_100	1.1183e+07	3344.09	0.4935	1.0859	2715.82	tf_idf_random_forest_100
553	553	random_forest_100	1.09874e+07	3314.73	0.5024	1.0844	2718.53	tf_idf_random_forest_100
554	554	random_forest_100	1.12165e+07	3349.11	0.492	1.0861	2753.12	tf_idf_random_forest_100
555	555	random_forest_100	1.07973e+07	3285.92	0.511	1.0829	2682.2	tf_idf_random_forest_100
556	556	random_forest_100	1.12659e+07	3356.47	0.4898	1.0865	2798.07	tf_idf_random_forest_100
557	557	random_forest_100	1.10686e+07	3326.95	0.4987	1.085	2694.43	tf_idf_random_forest_100
558	558	random_forest_100	1.13247e+07	3365.22	0.4871	1.087	2702.94	tf_idf_random_forest_100
559	559	random_forest_100	1.13801e+07	3373.44	0.4846	1.0874	2765.8	tf_idf_random_forest_100
560	560	random_forest_100	1.15199e+07	3394.1	0.4783	1.0885	2779.2	tf_idf_random_forest_100
561	561	random_forest_100	1.16512e+07	3413.38	0.4723	1.0895	2787.33	tf_idf_random_forest_100
562	562	random_forest_100	1.13965e+07	3375.87	0.4839	1.0875	2726.39	tf_idf_random_forest_100
563	563	random_forest_100	1.06777e+07	3267.67	0.5164	1.082	2690.54	tf_idf_random_forest_100
564	564	random_forest_100	1.09937e+07	3315.68	0.5021	1.0844	2729.32	tf_idf_random_forest_100
565	565	random_forest_100	1.1008e+07	3317.83	0.5015	1.0845	2691.28	tf_idf_random_forest_100
566	566	random_forest_100	1.21786e+07	3489.78	0.4485	1.0935	2810.38	tf_idf_random_forest_100
567	567	random_forest_100	1.07053e+07	3271.89	0.5152	1.0822	2686.7	tf_idf_random_forest_100
568	568	random_forest_100	1.12828e+07	3358.99	0.489	1.0866	2773.51	tf_idf_random_forest_100
569	569	random_forest_100	1.15067e+07	3392.16	0.4789	1.0884	2780.82	tf_idf_random_forest_100
570	570	random_forest_100	1.14905e+07	3389.77	0.4796	1.0882	2759.08	tf_idf_random_forest_100
571	571	random_forest_100	1.05845e+07	3253.38	0.5206	1.0813	2696.11	tf_idf_random_forest_100
572	572	random_forest_100	1.06012e+07	3255.95	0.5199	1.0814	2665.36	tf_idf_random_forest_100
573	573	random_forest_100	1.14063e+07	3377.32	0.4834	1.0876	2774.84	tf_idf_random_forest_100
574	574	random_forest_100	11566197	3400.91	0.4762	1.0888	2801.62	tf_idf_random_forest_100
575	575	random_forest_100	1.11532e+07	3339.64	0.4949	1.0856	2752.78	tf_idf_random_forest_100
576	576	random_forest_100	1.13784e+07	3373.19	0.4847	1.0874	2782.29	tf_idf_random_forest_100
577	577	random_forest_100	1.08582e+07	3295.18	0.5083	1.0834	2714.59	tf_idf_random_forest_100
578	578	random_forest_100	1.13321e+07	3366.33	0.4868	1.087	2762.13	tf_idf_random_forest_100
579	579	random_forest_100	1.10215e+07	3319.86	0.5009	1.0846	2751.58	tf_idf_random_forest_100
580	580	random_forest_100	1.07528e+07	3279.15	0.513	1.0826	2720.58	tf_idf_random_forest_100
581	581	random_forest_100	1.13648e+07	3371.17	0.4853	1.0873	2769.79	tf_idf_random_forest_100
582	582	random_forest_100	1.14418e+07	3382.57	0.4818	1.0879	2762.66	tf_idf_random_forest_100
583	583	random_forest_100	1.13551e+07	3369.73	0.4857	1.0872	2752.06	tf_idf_random_forest_100
584	584	random_forest_100	1.13676e+07	3371.58	0.4852	1.0873	2780.26	tf_idf_random_forest_100
585	585	random_forest_100	1.09343e+07	3306.71	0.5048	1.084	2738.58	tf_idf_random_forest_100
586	586	random_forest_100	1.13221e+07	3364.83	0.4872	1.0869	2778.63	tf_idf_random_forest_100
587	587	random_forest_100	1.08111e+07	3288.02	0.5104	1.083	2732.74	tf_idf_random_forest_100
588	588	random_forest_100	1.13277e+07	3365.67	0.487	1.087	2753.73	tf_idf_random_forest_100
589	589	random_forest_100	1.08824e+07	3298.85	0.5072	1.0836	2706.12	tf_idf_random_forest_100
590	590	random_forest_100	1.11727e+07	3342.56	0.494	1.0858	2749.22	tf_idf_random_forest_100
591	591	random_forest_100	1.15749e+07	3402.2	0.4758	1.0889	2792.35	tf_idf_random_forest_100
592	592	random_forest_100	1.14128e+07	3378.28	0.4831	1.0876	2774.45	tf_idf_random_forest_100
593	593	random_forest_100	1.14398e+07	3382.27	0.4819	1.0878	2749.2	tf_idf_random_forest_100
594	594	random_forest_100	1.09452e+07	3308.36	0.5043	1.084	2737.11	tf_idf_random_forest_100
595	595	random_forest_100	1.12371e+07	3352.18	0.4911	1.0863	2764.07	tf_idf_random_forest_100
596	596	random_forest_100	1.09081e+07	3302.74	0.506	1.0838	2745.3	tf_idf_random_forest_100
597	597	random_forest_100	1.09616e+07	3310.84	0.5036	1.0842	2699.68	tf_idf_random_forest_100
598	598	random_forest_100	1.09877e+07	3314.77	0.5024	1.0844	2734.03	tf_idf_random_forest_100
599	599	random_forest_100	1.12702e+07	3357.11	0.4896	1.0865	2750.93	tf_idf_random_forest_100
600	600	random_forest_1000	1.09343e+07	3306.7	0.5048	1.084	2730.78	tf_idf_random_forest_1000
601	601	random_forest_1000	1.08212e+07	3289.56	0.5099	1.0831	2702.85	tf_idf_random_forest_1000
602	602	random_forest_1000	1.10729e+07	3327.6	0.4985	1.085	2749.02	tf_idf_random_forest_1000
603	603	random_forest_1000	1.09837e+07	3314.16	0.5026	1.0843	2723.84	tf_idf_random_forest_1000
604	604	random_forest_1000	1.09125e+07	3303.41	0.5058	1.0838	2710.35	tf_idf_random_forest_1000
605	605	random_forest_1000	1.0918e+07	3304.24	0.5055	1.0838	2727.15	tf_idf_random_forest_1000
606	606	random_forest_1000	1.08622e+07	3295.78	0.5081	1.0834	2709.5	tf_idf_random_forest_1000
607	607	random_forest_1000	1.09134e+07	3303.54	0.5058	1.0838	2720.86	tf_idf_random_forest_1000
608	608	random_forest_1000	1.08126e+07	3288.25	0.5103	1.083	2726.7	tf_idf_random_forest_1000
609	609	random_forest_1000	1.09211e+07	3304.71	0.5054	1.0839	2730.38	tf_idf_random_forest_1000
610	610	random_forest_1000	1.07119e+07	3272.91	0.5149	1.0823	2683.83	tf_idf_random_forest_1000
611	611	random_forest_1000	1.08396e+07	3292.36	0.5091	1.0832	2719.03	tf_idf_random_forest_1000
612	612	random_forest_1000	1.11072e+07	3332.74	0.497	1.0853	2749.5	tf_idf_random_forest_1000
613	613	random_forest_1000	1.09336e+07	3306.6	0.5048	1.084	2720.94	tf_idf_random_forest_1000
614	614	random_forest_1000	1.07988e+07	3286.15	0.5109	1.0829	2716.22	tf_idf_random_forest_1000
615	615	random_forest_1000	1.08066e+07	3287.34	0.5106	1.083	2713.5	tf_idf_random_forest_1000
616	616	random_forest_1000	1.10181e+07	3319.35	0.501	1.0846	2724.29	tf_idf_random_forest_1000
617	617	random_forest_1000	1.09253e+07	3305.34	0.5052	1.0839	2708.52	tf_idf_random_forest_1000
618	618	random_forest_1000	1.09562e+07	3310.02	0.5038	1.0841	2725.27	tf_idf_random_forest_1000
619	619	random_forest_1000	1.09288e+07	3305.87	0.5051	1.0839	2728.9	tf_idf_random_forest_1000
620	620	random_forest_1000	1.08876e+07	3299.63	0.5069	1.0836	2714.26	tf_idf_random_forest_1000
621	621	random_forest_1000	1.07582e+07	3279.97	0.5128	1.0826	2695.32	tf_idf_random_forest_1000
622	622	random_forest_1000	1.09021e+07	3301.84	0.5063	1.0837	2724.71	tf_idf_random_forest_1000
623	623	random_forest_1000	1.08957e+07	3300.86	0.5066	1.0837	2732.1	tf_idf_random_forest_1000
624	624	random_forest_1000	1.09294e+07	3305.97	0.505	1.0839	2718.98	tf_idf_random_forest_1000
625	625	random_forest_1000	1.08316e+07	3291.14	0.5095	1.0832	2700.25	tf_idf_random_forest_1000
626	626	random_forest_1000	1.08801e+07	3298.5	0.5073	1.0835	2723.42	tf_idf_random_forest_1000
627	627	random_forest_1000	1.09863e+07	3314.57	0.5024	1.0844	2739.76	tf_idf_random_forest_1000
628	628	random_forest_1000	1.10294e+07	3321.06	0.5005	1.0847	2738.35	tf_idf_random_forest_1000
629	629	random_forest_1000	1.09975e+07	3316.25	0.5019	1.0844	2729.73	tf_idf_random_forest_1000
630	630	random_forest_1000	1.10382e+07	3322.38	0.5001	1.0848	2738.92	tf_idf_random_forest_1000
631	631	random_forest_1000	1.08267e+07	3290.4	0.5097	1.0831	2715.08	tf_idf_random_forest_1000
632	632	random_forest_1000	1.0839e+07	3292.26	0.5091	1.0832	2728.32	tf_idf_random_forest_1000
633	633	random_forest_1000	1.08735e+07	3297.49	0.5076	1.0835	2709.69	tf_idf_random_forest_1000
634	634	random_forest_1000	1.08644e+07	3296.12	0.508	1.0834	2723.05	tf_idf_random_forest_1000
635	635	random_forest_1000	1.07064e+07	3272.07	0.5151	1.0822	2682.87	tf_idf_random_forest_1000
636	636	random_forest_1000	1.08402e+07	3292.45	0.5091	1.0832	2708.5	tf_idf_random_forest_1000
637	637	random_forest_1000	1.09626e+07	3310.98	0.5035	1.0842	2732.17	tf_idf_random_forest_1000
638	638	random_forest_1000	1.10702e+07	3327.2	0.4987	1.085	2743.93	tf_idf_random_forest_1000
639	639	random_forest_1000	1.1063e+07	3326.11	0.499	1.0849	2730.18	tf_idf_random_forest_1000
640	640	random_forest_1000	1.08621e+07	3295.77	0.5081	1.0834	2722.02	tf_idf_random_forest_1000
641	641	random_forest_1000	1.106e+07	3325.65	0.4991	1.0849	2727.18	tf_idf_random_forest_1000
642	642	random_forest_1000	1.09727e+07	3312.5	0.5031	1.0843	2722.48	tf_idf_random_forest_1000
643	643	random_forest_1000	1.11319e+07	3336.45	0.4959	1.0855	2745.94	tf_idf_random_forest_1000
644	644	random_forest_1000	1.08407e+07	3292.52	0.509	1.0832	2705.74	tf_idf_random_forest_1000
645	645	random_forest_1000	1.0936e+07	3306.97	0.5047	1.084	2710.35	tf_idf_random_forest_1000
646	646	random_forest_1000	1.09074e+07	3302.64	0.506	1.0838	2734.39	tf_idf_random_forest_1000
647	647	random_forest_1000	1.10376e+07	3322.29	0.5001	1.0848	2734.99	tf_idf_random_forest_1000
648	648	random_forest_1000	1.10651e+07	3326.42	0.4989	1.085	2735.36	tf_idf_random_forest_1000
649	649	random_forest_1000	1.07581e+07	3279.95	0.5128	1.0826	2696.58	tf_idf_random_forest_1000
650	650	mlp_100	1.60835e+07	4010.42	0.2716	1.1235	3288.2	tf_idf_mlp_100
651	651	mlp_100	1.62213e+07	4027.57	0.2654	1.1246	3263.44	tf_idf_mlp_100
652	652	mlp_100	1.61526e+07	4019.03	0.2685	1.124	3278.93	tf_idf_mlp_100
653	653	mlp_100	1.62439e+07	4030.37	0.2643	1.1247	3286.74	tf_idf_mlp_100
654	654	mlp_100	1.60203e+07	4002.54	0.2745	1.123	3253.26	tf_idf_mlp_100
655	655	mlp_100	1.60508e+07	4006.35	0.2731	1.1232	3250.57	tf_idf_mlp_100
656	656	mlp_100	1.61004e+07	4012.53	0.2708	1.1236	3247.83	tf_idf_mlp_100
657	657	mlp_100	1.61808e+07	4022.54	0.2672	1.1242	3310.95	tf_idf_mlp_100
658	658	mlp_100	1.67677e+07	4094.84	0.2406	1.1288	3318.98	tf_idf_mlp_100
659	659	mlp_100	1.60688e+07	4008.59	0.2723	1.1234	3240.74	tf_idf_mlp_100
660	660	mlp_100	1.65658e+07	4070.11	0.2498	1.1272	3310.84	tf_idf_mlp_100
661	661	mlp_100	1.65541e+07	4068.68	0.2503	1.1271	3311.29	tf_idf_mlp_100
662	662	mlp_100	1.61785e+07	4022.26	0.2673	1.1242	3283.06	tf_idf_mlp_100
663	663	mlp_100	1.63253e+07	4040.46	0.2607	1.1254	3303.86	tf_idf_mlp_100
664	664	mlp_100	1.62534e+07	4031.55	0.2639	1.1248	3294.55	tf_idf_mlp_100
665	665	mlp_100	1.63998e+07	4049.67	0.2573	1.1259	3308.33	tf_idf_mlp_100
666	666	mlp_100	1.60823e+07	4010.27	0.2717	1.1235	3287.27	tf_idf_mlp_100
667	667	mlp_100	1.60259e+07	4003.24	0.2742	1.1231	3239.65	tf_idf_mlp_100
668	668	mlp_100	1.62801e+07	4034.86	0.2627	1.125	3301.06	tf_idf_mlp_100
669	669	mlp_100	1.59644e+07	3995.55	0.277	1.1226	3231.24	tf_idf_mlp_100
670	670	mlp_100	1.62474e+07	4030.8	0.2642	1.1248	3275.06	tf_idf_mlp_100
671	671	mlp_100	1.60192e+07	4002.4	0.2745	1.123	3231.47	tf_idf_mlp_100
672	672	mlp_100	1.61839e+07	4022.92	0.2671	1.1243	3296.75	tf_idf_mlp_100
673	673	mlp_100	1.6204e+07	4025.41	0.2662	1.1244	3280.82	tf_idf_mlp_100
674	674	mlp_100	1.64273e+07	4053.06	0.256	1.1261	3307.19	tf_idf_mlp_100
675	675	mlp_100	1.6135e+07	4016.84	0.2693	1.1239	3274.28	tf_idf_mlp_100
676	676	mlp_100	1.61098e+07	4013.7	0.2704	1.1237	3223.78	tf_idf_mlp_100
677	677	mlp_100	1.60005e+07	4000.06	0.2754	1.1229	3250.33	tf_idf_mlp_100
678	678	mlp_100	1.60032e+07	4000.39	0.2752	1.1229	3255.85	tf_idf_mlp_100
679	679	mlp_100	1.63118e+07	4038.79	0.2613	1.1253	3271.15	tf_idf_mlp_100
680	680	mlp_100	1.6639e+07	4079.09	0.2465	1.1278	3312.64	tf_idf_mlp_100
681	681	mlp_100	1.6017e+07	4002.13	0.2746	1.123	3238.92	tf_idf_mlp_100
682	682	mlp_100	1.60372e+07	4004.65	0.2737	1.1231	3269.79	tf_idf_mlp_100
683	683	mlp_100	1.64111e+07	4051.07	0.2568	1.126	3310.84	tf_idf_mlp_100
684	684	mlp_100	1.64149e+07	4051.53	0.2566	1.126	3311.61	tf_idf_mlp_100
685	685	mlp_100	1.61564e+07	4019.51	0.2683	1.1241	3270.01	tf_idf_mlp_100
686	686	mlp_100	1.61788e+07	4022.29	0.2673	1.1242	3298.89	tf_idf_mlp_100
687	687	mlp_100	1.64785e+07	4059.38	0.2537	1.1265	3304.37	tf_idf_mlp_100
688	688	mlp_100	1.6234e+07	4029.15	0.2648	1.1247	3261.9	tf_idf_mlp_100
689	689	mlp_100	1.6082e+07	4010.23	0.2717	1.1235	3227.06	tf_idf_mlp_100
690	690	mlp_100	1.65424e+07	4067.24	0.2508	1.127	3312.18	tf_idf_mlp_100
691	691	mlp_100	1.61815e+07	4022.62	0.2672	1.1243	3284.24	tf_idf_mlp_100
692	692	mlp_100	1.61864e+07	4023.24	0.2669	1.1243	3286.59	tf_idf_mlp_100
693	693	mlp_100	1.59603e+07	3995.03	0.2772	1.1226	3235.47	tf_idf_mlp_100
694	694	mlp_100	1.60072e+07	4000.9	0.2751	1.1229	3261.74	tf_idf_mlp_100
695	695	mlp_100	1.62731e+07	4033.99	0.263	1.125	3266.62	tf_idf_mlp_100
696	696	mlp_100	1.63733e+07	4046.4	0.2585	1.1257	3307.55	tf_idf_mlp_100
697	697	mlp_100	1.60282e+07	4003.52	0.2741	1.1231	3267.96	tf_idf_mlp_100
698	698	mlp_100	1.61267e+07	4015.81	0.2697	1.1238	3292.41	tf_idf_mlp_100
699	699	mlp_100	1.63306e+07	4041.11	0.2604	1.1254	3281.53	tf_idf_mlp_100
700	700	mlp_100_50	1.73494e+07	4165.26	0.2143	1.1332	3136.08	tf_idf_mlp_100_50
701	701	mlp_100_50	1.86663e+07	4320.45	0.1546	1.1433	3361.44	tf_idf_mlp_100_50
702	702	mlp_100_50	1.8195e+07	4265.56	0.176	1.1397	3278.87	tf_idf_mlp_100_50
703	703	mlp_100_50	1.74721e+07	4179.96	0.2087	1.1342	3162.66	tf_idf_mlp_100_50
704	704	mlp_100_50	1.73882e+07	4169.91	0.2125	1.1335	3155.01	tf_idf_mlp_100_50
705	705	mlp_100_50	1.72685e+07	4155.54	0.2179	1.1326	3151.13	tf_idf_mlp_100_50
706	706	mlp_100_50	1.87924e+07	4335.02	0.1489	1.1443	3410.45	tf_idf_mlp_100_50
707	707	mlp_100_50	1.74132e+07	4172.91	0.2114	1.1337	3152.27	tf_idf_mlp_100_50
708	708	mlp_100_50	1.75938e+07	4194.49	0.2032	1.1351	3180.33	tf_idf_mlp_100_50
709	709	mlp_100_50	1.71195e+07	4137.57	0.2247	1.1315	3113.52	tf_idf_mlp_100_50
710	710	mlp_100_50	1.76696e+07	4203.52	0.1998	1.1357	3225.35	tf_idf_mlp_100_50
711	711	mlp_100_50	1.75443e+07	4188.59	0.2055	1.1347	3157.82	tf_idf_mlp_100_50
712	712	mlp_100_50	1.72742e+07	4156.22	0.2177	1.1326	3132.25	tf_idf_mlp_100_50
713	713	mlp_100_50	1.75804e+07	4192.9	0.2038	1.135	3189.69	tf_idf_mlp_100_50
714	714	mlp_100_50	1.74513e+07	4177.48	0.2097	1.134	3141.62	tf_idf_mlp_100_50
715	715	mlp_100_50	1.77315e+07	4210.88	0.197	1.1362	3227.64	tf_idf_mlp_100_50
716	716	mlp_100_50	1.78528e+07	4225.26	0.1915	1.1371	3212.07	tf_idf_mlp_100_50
717	717	mlp_100_50	1.77633e+07	4214.66	0.1955	1.1364	3210.78	tf_idf_mlp_100_50
718	718	mlp_100_50	1.71416e+07	4140.24	0.2237	1.1316	3140.73	tf_idf_mlp_100_50
719	719	mlp_100_50	1.74073e+07	4172.2	0.2117	1.1337	3141.11	tf_idf_mlp_100_50
720	720	mlp_100_50	1.71215e+07	4137.81	0.2246	1.1315	3117.92	tf_idf_mlp_100_50
721	721	mlp_100_50	1.94854e+07	4414.23	0.1175	1.1496	3482.47	tf_idf_mlp_100_50
722	722	mlp_100_50	1.69042e+07	4111.48	0.2344	1.1298	3095.38	tf_idf_mlp_100_50
723	723	mlp_100_50	1.78538e+07	4225.37	0.1914	1.1371	3228.92	tf_idf_mlp_100_50
724	724	mlp_100_50	1.91504e+07	4376.12	0.1327	1.147	3441.36	tf_idf_mlp_100_50
725	725	mlp_100_50	1.81076e+07	4255.3	0.1799	1.139	3275.54	tf_idf_mlp_100_50
726	726	mlp_100_50	1.79359e+07	4235.08	0.1877	1.1377	3223.93	tf_idf_mlp_100_50
727	727	mlp_100_50	1.76213e+07	4197.77	0.202	1.1353	3179.83	tf_idf_mlp_100_50
728	728	mlp_100_50	1.72892e+07	4158.03	0.217	1.1328	3129.38	tf_idf_mlp_100_50
729	729	mlp_100_50	1.74453e+07	4176.75	0.2099	1.134	3154.78	tf_idf_mlp_100_50
730	730	mlp_100_50	1.79217e+07	4233.4	0.1884	1.1376	3220.61	tf_idf_mlp_100_50
731	731	mlp_100_50	1.67274e+07	4089.92	0.2424	1.1284	3088.35	tf_idf_mlp_100_50
732	732	mlp_100_50	1.74893e+07	4182.02	0.2079	1.1343	3152.07	tf_idf_mlp_100_50
733	733	mlp_100_50	1.72269e+07	4150.53	0.2198	1.1323	3130.1	tf_idf_mlp_100_50
734	734	mlp_100_50	1.78806e+07	4228.54	0.1902	1.1373	3220.83	tf_idf_mlp_100_50
735	735	mlp_100_50	1.74639e+07	4178.98	0.2091	1.1341	3148.3	tf_idf_mlp_100_50
736	736	mlp_100_50	1.75042e+07	4183.8	0.2073	1.1344	3151.39	tf_idf_mlp_100_50
737	737	mlp_100_50	1.79986e+07	4242.47	0.1849	1.1382	3247.4	tf_idf_mlp_100_50
738	738	mlp_100_50	1.69893e+07	4121.81	0.2306	1.1305	3111.29	tf_idf_mlp_100_50
739	739	mlp_100_50	1.69029e+07	4111.31	0.2345	1.1298	3106.3	tf_idf_mlp_100_50
740	740	mlp_100_50	1.80207e+07	4245.08	0.1839	1.1384	3231	tf_idf_mlp_100_50
741	741	mlp_100_50	1.71756e+07	4144.35	0.2222	1.1319	3127.78	tf_idf_mlp_100_50
742	742	mlp_100_50	1.85845e+07	4310.98	0.1583	1.1427	3305.66	tf_idf_mlp_100_50
743	743	mlp_100_50	1.80346e+07	4246.71	0.1832	1.1385	3275.75	tf_idf_mlp_100_50
744	744	mlp_100_50	1.77527e+07	4213.4	0.196	1.1363	3207.33	tf_idf_mlp_100_50
745	745	mlp_100_50	1.72263e+07	4150.46	0.2199	1.1323	3132.22	tf_idf_mlp_100_50
746	746	mlp_100_50	1.77431e+07	4212.26	0.1964	1.1362	3210.9	tf_idf_mlp_100_50
747	747	mlp_100_50	1.72433e+07	4152.5	0.2191	1.1324	3139.96	tf_idf_mlp_100_50
748	748	mlp_100_50	1.74318e+07	4175.14	0.2105	1.1339	3156.35	tf_idf_mlp_100_50
749	749	mlp_100_50	1.80854e+07	4252.7	0.1809	1.1389	3293.88	tf_idf_mlp_100_50
750	750	mlp_100_100_50	1.61461e+07	4018.22	0.2688	1.124	3036.78	tf_idf_mlp_100_100_50
751	751	mlp_100_100_50	1.57045e+07	3962.89	0.2888	1.1206	2980.13	tf_idf_mlp_100_100_50
752	752	mlp_100_100_50	1.58977e+07	3987.2	0.28	1.1221	3008.85	tf_idf_mlp_100_100_50
753	753	mlp_100_100_50	1.59779e+07	3997.23	0.2764	1.1227	3013.27	tf_idf_mlp_100_100_50
754	754	mlp_100_100_50	1.5846e+07	3980.7	0.2824	1.1217	2990.08	tf_idf_mlp_100_100_50
755	755	mlp_100_100_50	1.58012e+07	3975.08	0.2844	1.1213	2993.53	tf_idf_mlp_100_100_50
756	756	mlp_100_100_50	1.5845e+07	3980.58	0.2824	1.1217	3004.31	tf_idf_mlp_100_100_50
757	757	mlp_100_100_50	1.58725e+07	3984.03	0.2812	1.1219	3007.3	tf_idf_mlp_100_100_50
758	758	mlp_100_100_50	1.60522e+07	4006.52	0.273	1.1233	3041.66	tf_idf_mlp_100_100_50
759	759	mlp_100_100_50	1.5923e+07	3990.36	0.2789	1.1223	3029.78	tf_idf_mlp_100_100_50
760	760	mlp_100_100_50	1.60134e+07	4001.68	0.2748	1.123	3007.14	tf_idf_mlp_100_100_50
761	761	mlp_100_100_50	1.56769e+07	3959.41	0.29	1.1204	2986.74	tf_idf_mlp_100_100_50
762	762	mlp_100_100_50	1.57362e+07	3966.89	0.2873	1.1208	2982.59	tf_idf_mlp_100_100_50
763	763	mlp_100_100_50	1.56656e+07	3957.98	0.2905	1.1203	2986.64	tf_idf_mlp_100_100_50
764	764	mlp_100_100_50	1.59803e+07	3997.54	0.2763	1.1227	3018.73	tf_idf_mlp_100_100_50
765	765	mlp_100_100_50	1.58195e+07	3977.38	0.2836	1.1215	2990.84	tf_idf_mlp_100_100_50
766	766	mlp_100_100_50	1.59311e+07	3991.38	0.2785	1.1223	3021.53	tf_idf_mlp_100_100_50
767	767	mlp_100_100_50	1.58904e+07	3986.27	0.2804	1.122	3007.87	tf_idf_mlp_100_100_50
768	768	mlp_100_100_50	1.57882e+07	3973.43	0.285	1.1212	2997.21	tf_idf_mlp_100_100_50
769	769	mlp_100_100_50	1.57774e+07	3972.08	0.2855	1.1211	2984	tf_idf_mlp_100_100_50
770	770	mlp_100_100_50	1.6041e+07	4005.12	0.2735	1.1232	3023.53	tf_idf_mlp_100_100_50
771	771	mlp_100_100_50	1.56232e+07	3952.62	0.2925	1.12	2985.74	tf_idf_mlp_100_100_50
772	772	mlp_100_100_50	1.58835e+07	3985.41	0.2807	1.122	3012.22	tf_idf_mlp_100_100_50
773	773	mlp_100_100_50	1.60788e+07	4009.84	0.2718	1.1235	3037.74	tf_idf_mlp_100_100_50
774	774	mlp_100_100_50	1.59905e+07	3998.81	0.2758	1.1228	3029.66	tf_idf_mlp_100_100_50
775	775	mlp_100_100_50	1.59306e+07	3991.31	0.2785	1.1223	3015.04	tf_idf_mlp_100_100_50
776	776	mlp_100_100_50	1.61133e+07	4014.14	0.2703	1.1237	3033.44	tf_idf_mlp_100_100_50
777	777	mlp_100_100_50	1.57545e+07	3969.2	0.2865	1.121	3009.51	tf_idf_mlp_100_100_50
778	778	mlp_100_100_50	1.58384e+07	3979.75	0.2827	1.1216	3008.36	tf_idf_mlp_100_100_50
779	779	mlp_100_100_50	1.5703e+07	3962.7	0.2888	1.1206	2981.36	tf_idf_mlp_100_100_50
780	780	mlp_100_100_50	1.58704e+07	3983.77	0.2813	1.1219	3007.19	tf_idf_mlp_100_100_50
781	781	mlp_100_100_50	1.5929e+07	3991.11	0.2786	1.1223	3004.86	tf_idf_mlp_100_100_50
782	782	mlp_100_100_50	1.5595e+07	3949.04	0.2937	1.1197	2965.27	tf_idf_mlp_100_100_50
783	783	mlp_100_100_50	1.59904e+07	3998.79	0.2758	1.1228	3002.25	tf_idf_mlp_100_100_50
784	784	mlp_100_100_50	1.57832e+07	3972.8	0.2852	1.1212	2988.99	tf_idf_mlp_100_100_50
785	785	mlp_100_100_50	1.59828e+07	3997.85	0.2762	1.1227	3010.27	tf_idf_mlp_100_100_50
786	786	mlp_100_100_50	1.59012e+07	3987.63	0.2799	1.1221	2999.92	tf_idf_mlp_100_100_50
787	787	mlp_100_100_50	1.58933e+07	3986.64	0.2802	1.122	3017.36	tf_idf_mlp_100_100_50
788	788	mlp_100_100_50	1.58082e+07	3975.95	0.2841	1.1214	3007.44	tf_idf_mlp_100_100_50
789	789	mlp_100_100_50	1.57916e+07	3973.86	0.2848	1.1213	2997.96	tf_idf_mlp_100_100_50
790	790	mlp_100_100_50	1.58288e+07	3978.54	0.2831	1.1215	3006.48	tf_idf_mlp_100_100_50
791	791	mlp_100_100_50	1.58637e+07	3982.93	0.2816	1.1218	2991.65	tf_idf_mlp_100_100_50
792	792	mlp_100_100_50	1.62875e+07	4035.78	0.2624	1.1251	3047.18	tf_idf_mlp_100_100_50
793	793	mlp_100_100_50	1.57316e+07	3966.31	0.2875	1.1208	2999.08	tf_idf_mlp_100_100_50
794	794	mlp_100_100_50	1.58335e+07	3979.13	0.2829	1.1216	2991.29	tf_idf_mlp_100_100_50
795	795	mlp_100_100_50	1.59103e+07	3988.78	0.2795	1.1222	3016.92	tf_idf_mlp_100_100_50
796	796	mlp_100_100_50	1.55194e+07	3939.46	0.2972	1.1192	2987.17	tf_idf_mlp_100_100_50
797	797	mlp_100_100_50	1.62869e+07	4035.71	0.2624	1.1251	3056.23	tf_idf_mlp_100_100_50
798	798	mlp_100_100_50	1.664e+07	4079.22	0.2464	1.1278	3084.8	tf_idf_mlp_100_100_50
799	799	mlp_100_100_50	1.59317e+07	3991.45	0.2785	1.1223	3002.74	tf_idf_mlp_100_100_50
800	800	decision_tree	3.37904e+07	5812.95	-0.5303	1.2595	3928.64	tf_idf_decision_tree
801	801	decision_tree	2.95271e+07	5433.89	-0.3372	1.2267	3738.11	tf_idf_decision_tree
802	802	decision_tree	2.77985e+07	5272.42	-0.2589	1.2135	3549.36	tf_idf_decision_tree
803	803	decision_tree	2.62469e+07	5123.17	-0.1887	1.2015	3403.75	tf_idf_decision_tree
804	804	decision_tree	3.61876e+07	6015.62	-0.6389	1.2779	3938.57	tf_idf_decision_tree
805	805	decision_tree	3.21507e+07	5670.16	-0.456	1.2469	3759.92	tf_idf_decision_tree
806	806	decision_tree	3.50055e+07	5916.54	-0.5853	1.2688	4069.64	tf_idf_decision_tree
807	807	decision_tree	3.02779e+07	5502.54	-0.3712	1.2325	3819.31	tf_idf_decision_tree
808	808	decision_tree	3.32491e+07	5766.21	-0.5058	1.2553	3751.56	tf_idf_decision_tree
809	809	decision_tree	3.42132e+07	5849.2	-0.5494	1.2627	4127.51	tf_idf_decision_tree
810	810	decision_tree	3.28991e+07	5735.78	-0.4899	1.2526	3797.66	tf_idf_decision_tree
811	811	decision_tree	3.30962e+07	5752.93	-0.4989	1.2541	3859.15	tf_idf_decision_tree
812	812	decision_tree	3.12937e+07	5594.07	-0.4172	1.2403	3786.11	tf_idf_decision_tree
813	813	decision_tree	3.05129e+07	5523.85	-0.3819	1.2343	3705.46	tf_idf_decision_tree
814	814	decision_tree	2.99622e+07	5473.77	-0.3569	1.2301	3696.8	tf_idf_decision_tree
815	815	decision_tree	3.17916e+07	5638.41	-0.4398	1.2441	3703.88	tf_idf_decision_tree
816	816	decision_tree	3.02816e+07	5502.87	-0.3714	1.2325	3478.52	tf_idf_decision_tree
817	817	decision_tree	3.37799e+07	5812.05	-0.5298	1.2594	3928.73	tf_idf_decision_tree
818	818	decision_tree	28251571	5315.22	-0.2795	1.2169	3675.14	tf_idf_decision_tree
819	819	decision_tree	3.08862e+07	5557.53	-0.3988	1.2372	3619.36	tf_idf_decision_tree
820	820	decision_tree	3.07112e+07	5541.76	-0.3908	1.2358	3633.83	tf_idf_decision_tree
821	821	decision_tree	2.9177e+07	5401.58	-0.3214	1.224	3516.61	tf_idf_decision_tree
822	822	decision_tree	3.70731e+07	6088.77	-0.679	1.2847	3950.38	tf_idf_decision_tree
823	823	decision_tree	2.93315e+07	5415.85	-0.3284	1.2252	3627.31	tf_idf_decision_tree
824	824	decision_tree	3.10848e+07	5575.37	-0.4078	1.2387	3638.72	tf_idf_decision_tree
825	825	decision_tree	2.88483e+07	5371.06	-0.3065	1.2215	3725.42	tf_idf_decision_tree
826	826	decision_tree	3.28596e+07	5732.33	-0.4881	1.2523	3855.74	tf_idf_decision_tree
827	827	decision_tree	2.97847e+07	5457.54	-0.3489	1.2287	3685.54	tf_idf_decision_tree
828	828	decision_tree	3.18311e+07	5641.91	-0.4416	1.2444	3887.38	tf_idf_decision_tree
829	829	decision_tree	3.04496e+07	5518.11	-0.379	1.2338	3521.25	tf_idf_decision_tree
830	830	decision_tree	2.91268e+07	5396.92	-0.3191	1.2237	3628.78	tf_idf_decision_tree
831	831	decision_tree	3.38427e+07	5817.45	-0.5327	1.2599	3864.2	tf_idf_decision_tree
832	832	decision_tree	3.05801e+07	5529.93	-0.3849	1.2348	3754.66	tf_idf_decision_tree
833	833	decision_tree	3.17245e+07	5632.45	-0.4367	1.2436	3824.15	tf_idf_decision_tree
834	834	decision_tree	3.5298e+07	5941.21	-0.5986	1.271	3846	tf_idf_decision_tree
835	835	decision_tree	2.97374e+07	5453.2	-0.3467	1.2283	3738.11	tf_idf_decision_tree
836	836	decision_tree	2.89873e+07	5383.98	-0.3128	1.2226	3549.31	tf_idf_decision_tree
837	837	decision_tree	2.46672e+07	4966.61	-0.1171	1.1894	3260.03	tf_idf_decision_tree
838	838	decision_tree	3.59334e+07	5994.45	-0.6274	1.2759	4092.31	tf_idf_decision_tree
839	839	decision_tree	2.61977e+07	5118.37	-0.1864	1.2012	3467.05	tf_idf_decision_tree
840	840	decision_tree	3.01968e+07	5495.16	-0.3676	1.2319	3704.89	tf_idf_decision_tree
841	841	decision_tree	2.84026e+07	5329.4	-0.2863	1.2181	3473.21	tf_idf_decision_tree
842	842	decision_tree	2.84795e+07	5336.62	-0.2898	1.2187	3464.93	tf_idf_decision_tree
843	843	decision_tree	3.44536e+07	5869.72	-0.5603	1.2646	3870.94	tf_idf_decision_tree
844	844	decision_tree	3.16361e+07	5624.6	-0.4327	1.2429	3880.44	tf_idf_decision_tree
845	845	decision_tree	3.24502e+07	5696.51	-0.4696	1.2492	3765.26	tf_idf_decision_tree
846	846	decision_tree	3.20647e+07	5662.57	-0.4521	1.2462	3704.94	tf_idf_decision_tree
847	847	decision_tree	2.86764e+07	5355.03	-0.2987	1.2202	3683.5	tf_idf_decision_tree
848	848	decision_tree	2.74524e+07	5239.5	-0.2433	1.2108	3400.25	tf_idf_decision_tree
849	849	decision_tree	3.16113e+07	5622.39	-0.4316	1.2427	3718.85	tf_idf_decision_tree
850	850	adaboost	1.8186e+07	4264.51	0.1764	1.1396	3798.73	tf_idf_adaboost
851	851	adaboost	1.91119e+07	4371.71	0.1345	1.1468	3812.76	tf_idf_adaboost
852	852	adaboost	1.94023e+07	4404.81	0.1213	1.149	3854.01	tf_idf_adaboost
853	853	adaboost	1.98929e+07	4460.15	0.0991	1.1527	3907.93	tf_idf_adaboost
854	854	adaboost	1.92469e+07	4387.12	0.1283	1.1478	3809.41	tf_idf_adaboost
855	855	adaboost	1.95591e+07	4422.56	0.1142	1.1502	3833.92	tf_idf_adaboost
856	856	adaboost	1.98192e+07	4451.87	0.1024	1.1522	3905.46	tf_idf_adaboost
857	857	adaboost	1.91526e+07	4376.37	0.1326	1.1471	3842.08	tf_idf_adaboost
858	858	adaboost	1.86918e+07	4323.4	0.1535	1.1435	3713.47	tf_idf_adaboost
859	859	adaboost	1.83305e+07	4281.41	0.1698	1.1408	3748.24	tf_idf_adaboost
860	860	adaboost	1.97081e+07	4439.38	0.1075	1.1513	3902.48	tf_idf_adaboost
861	861	adaboost	1.91429e+07	4375.26	0.1331	1.147	3855.28	tf_idf_adaboost
862	862	adaboost	1.91324e+07	4374.06	0.1335	1.1469	3778.35	tf_idf_adaboost
863	863	adaboost	1.88149e+07	4337.62	0.1479	1.1445	3823.76	tf_idf_adaboost
864	864	adaboost	1.92995e+07	4393.11	0.126	1.1482	3840.67	tf_idf_adaboost
865	865	adaboost	2.03637e+07	4512.61	0.0778	1.1564	3937.8	tf_idf_adaboost
866	866	adaboost	1.8992e+07	4357.98	0.1399	1.1458	3806.3	tf_idf_adaboost
[truncated: 8,583 more rows]

## Sheet: merge
id	Unnamed: 0	algorithm	mse	rmse	r2	adj_r2	mae	alg_ab
[truncated: 23,300 more rows]

[truncated: 2 more sheets: pivot_rmse, pivot_r2]
