# Supplementary figures and images for: Regression applied to legal judgments to predict compensation for immaterial damage
Source: PeerJ journal article supplement (doi:10.7717/peerj-cs.1225), 2023-03-23

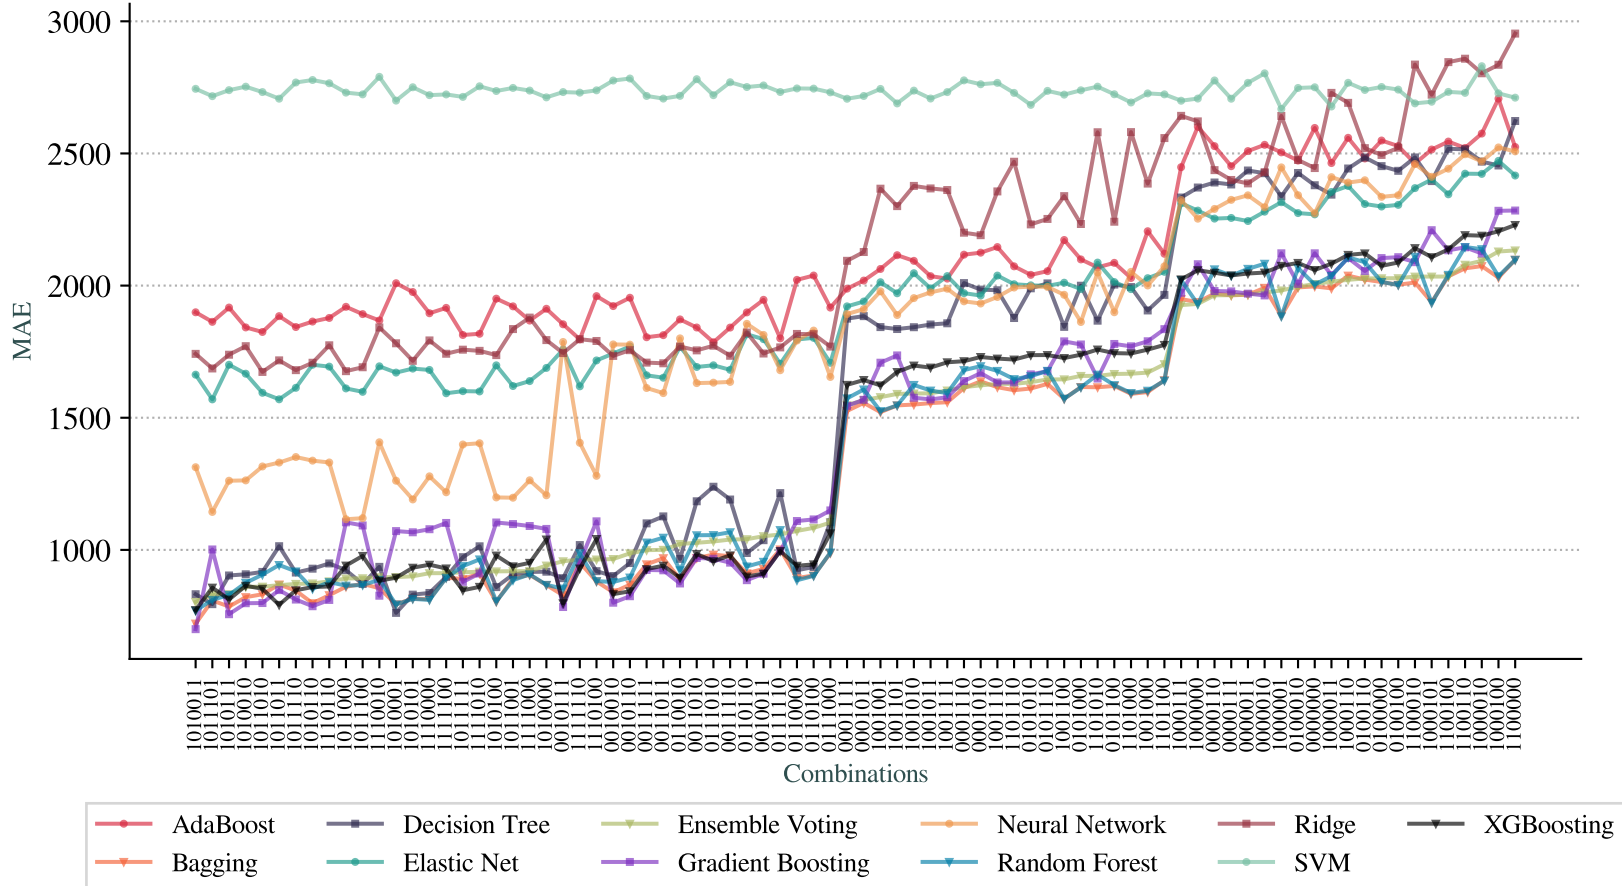

Supplement: text_regression_in_law_judgments.zip [file text_regression_in_law_judgments.zip]

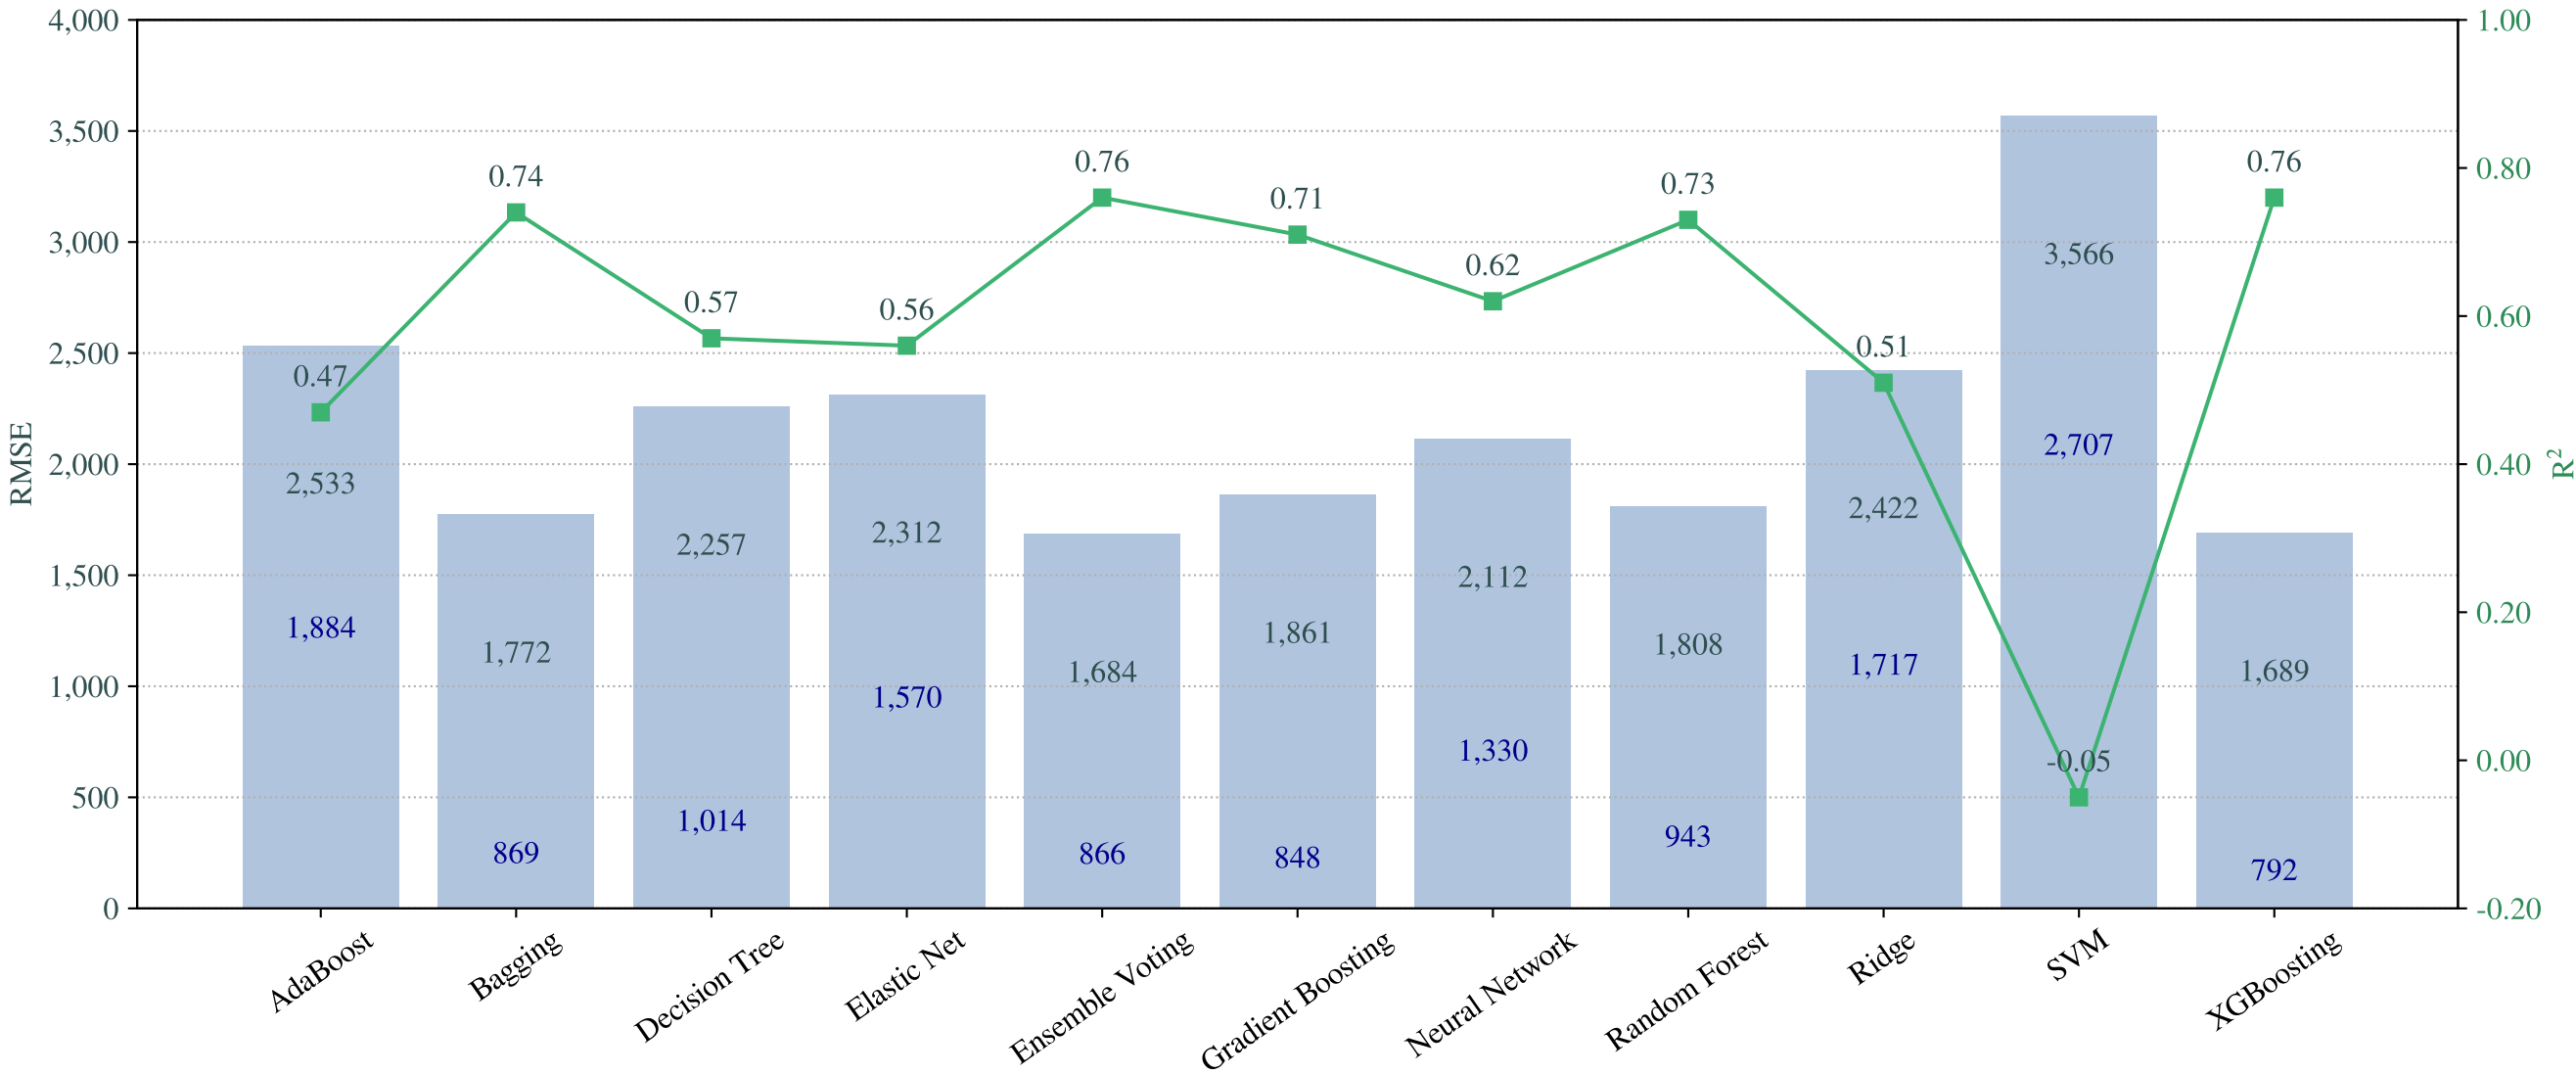

Supplement: text_regression_in_law_judgments.zip [file text_regression_in_law_judgments.zip]

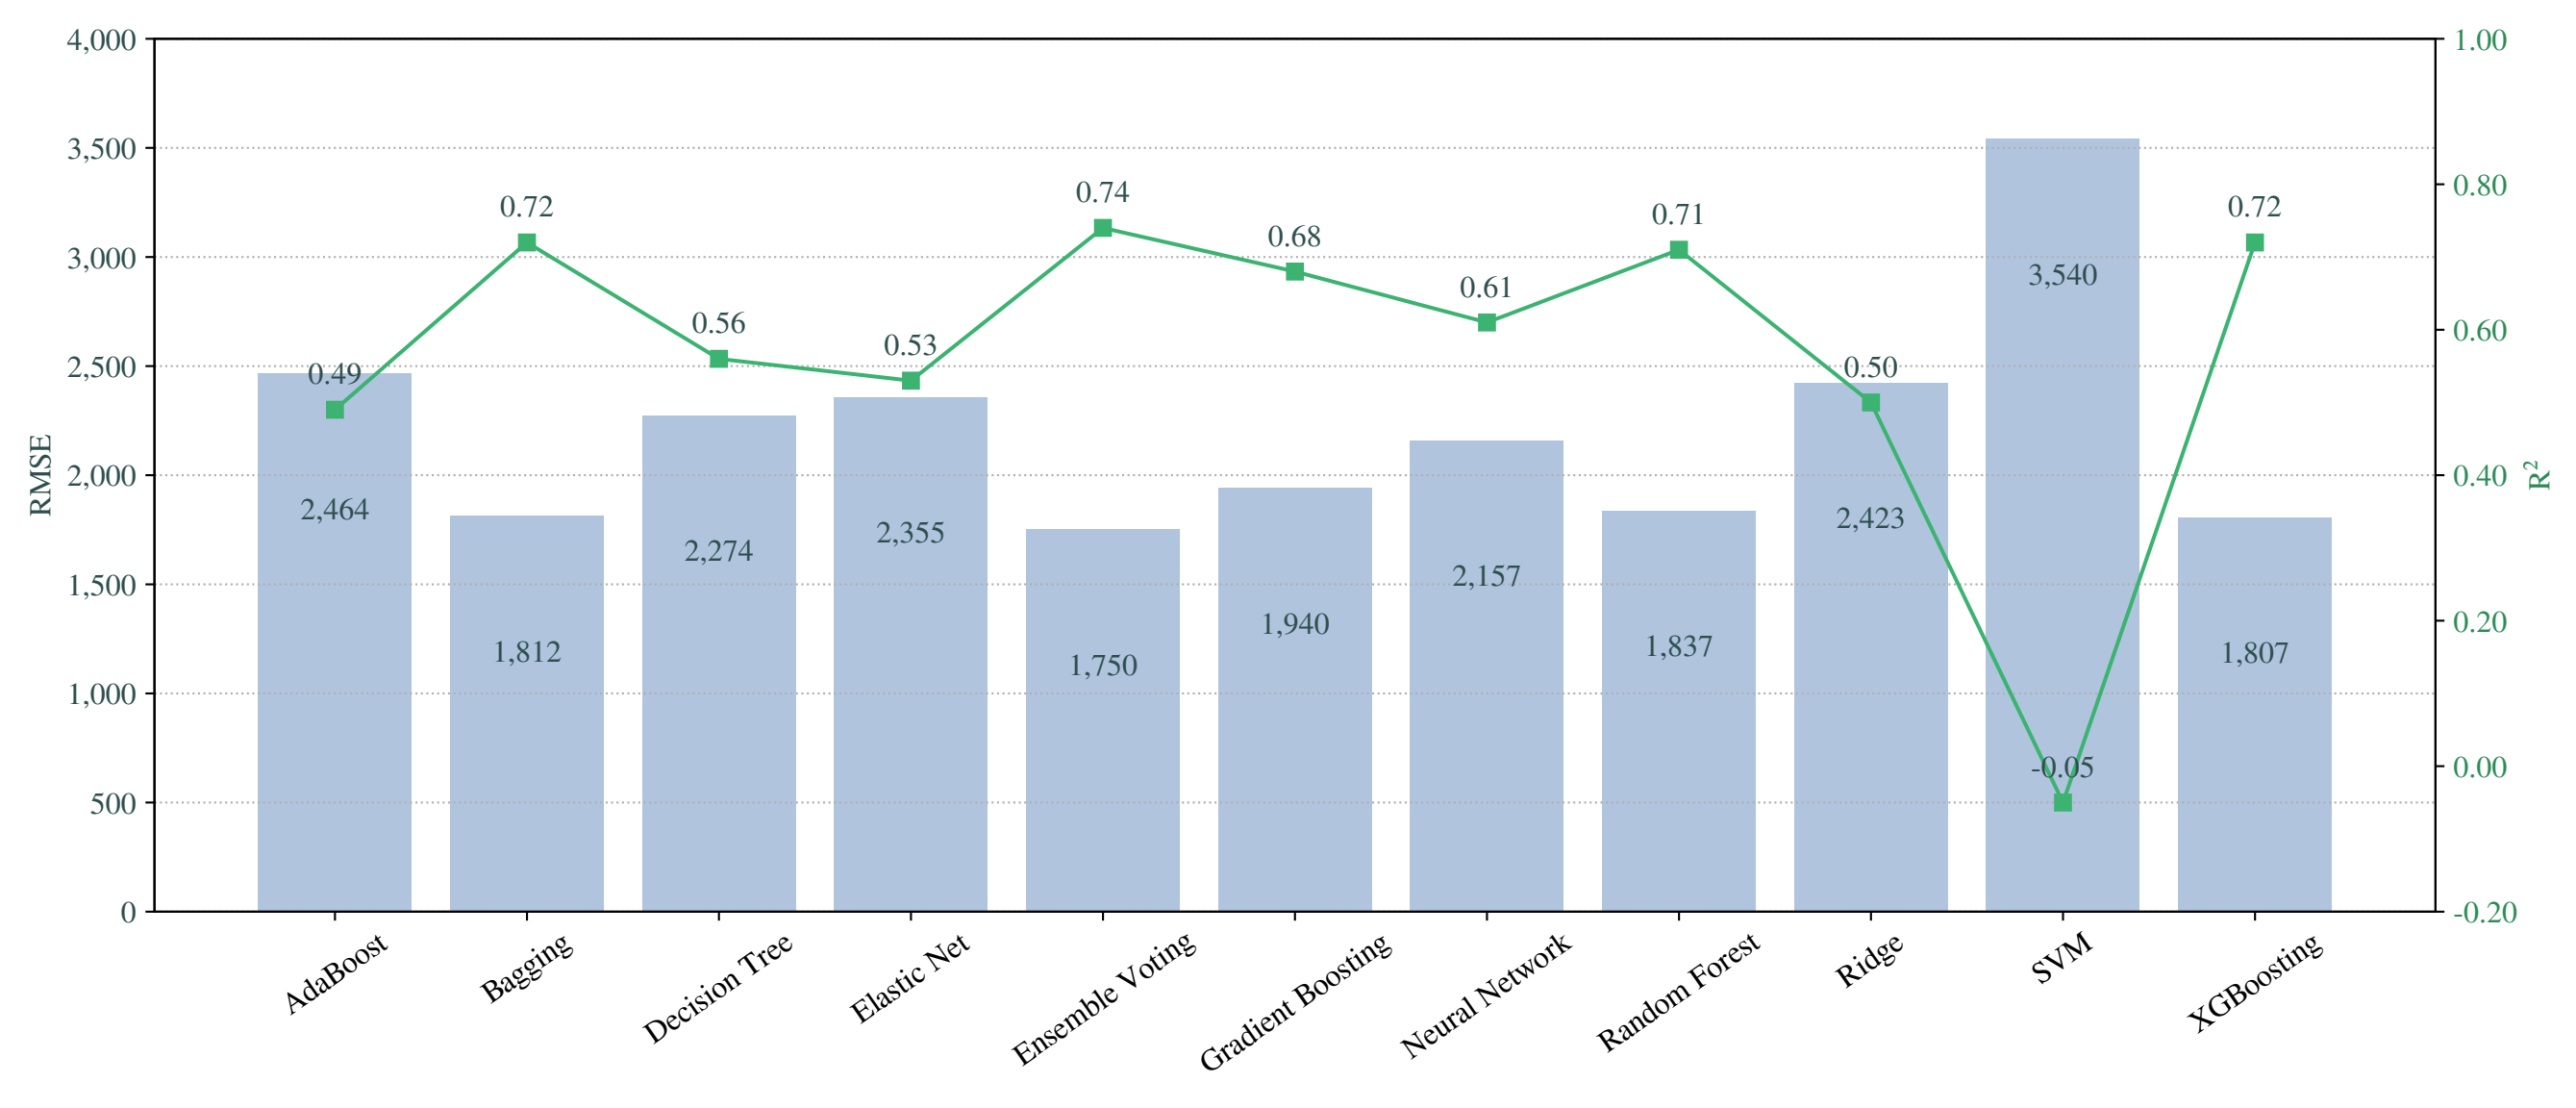

Supplement: text_regression_in_law_judgments.zip [file text_regression_in_law_judgments.zip]

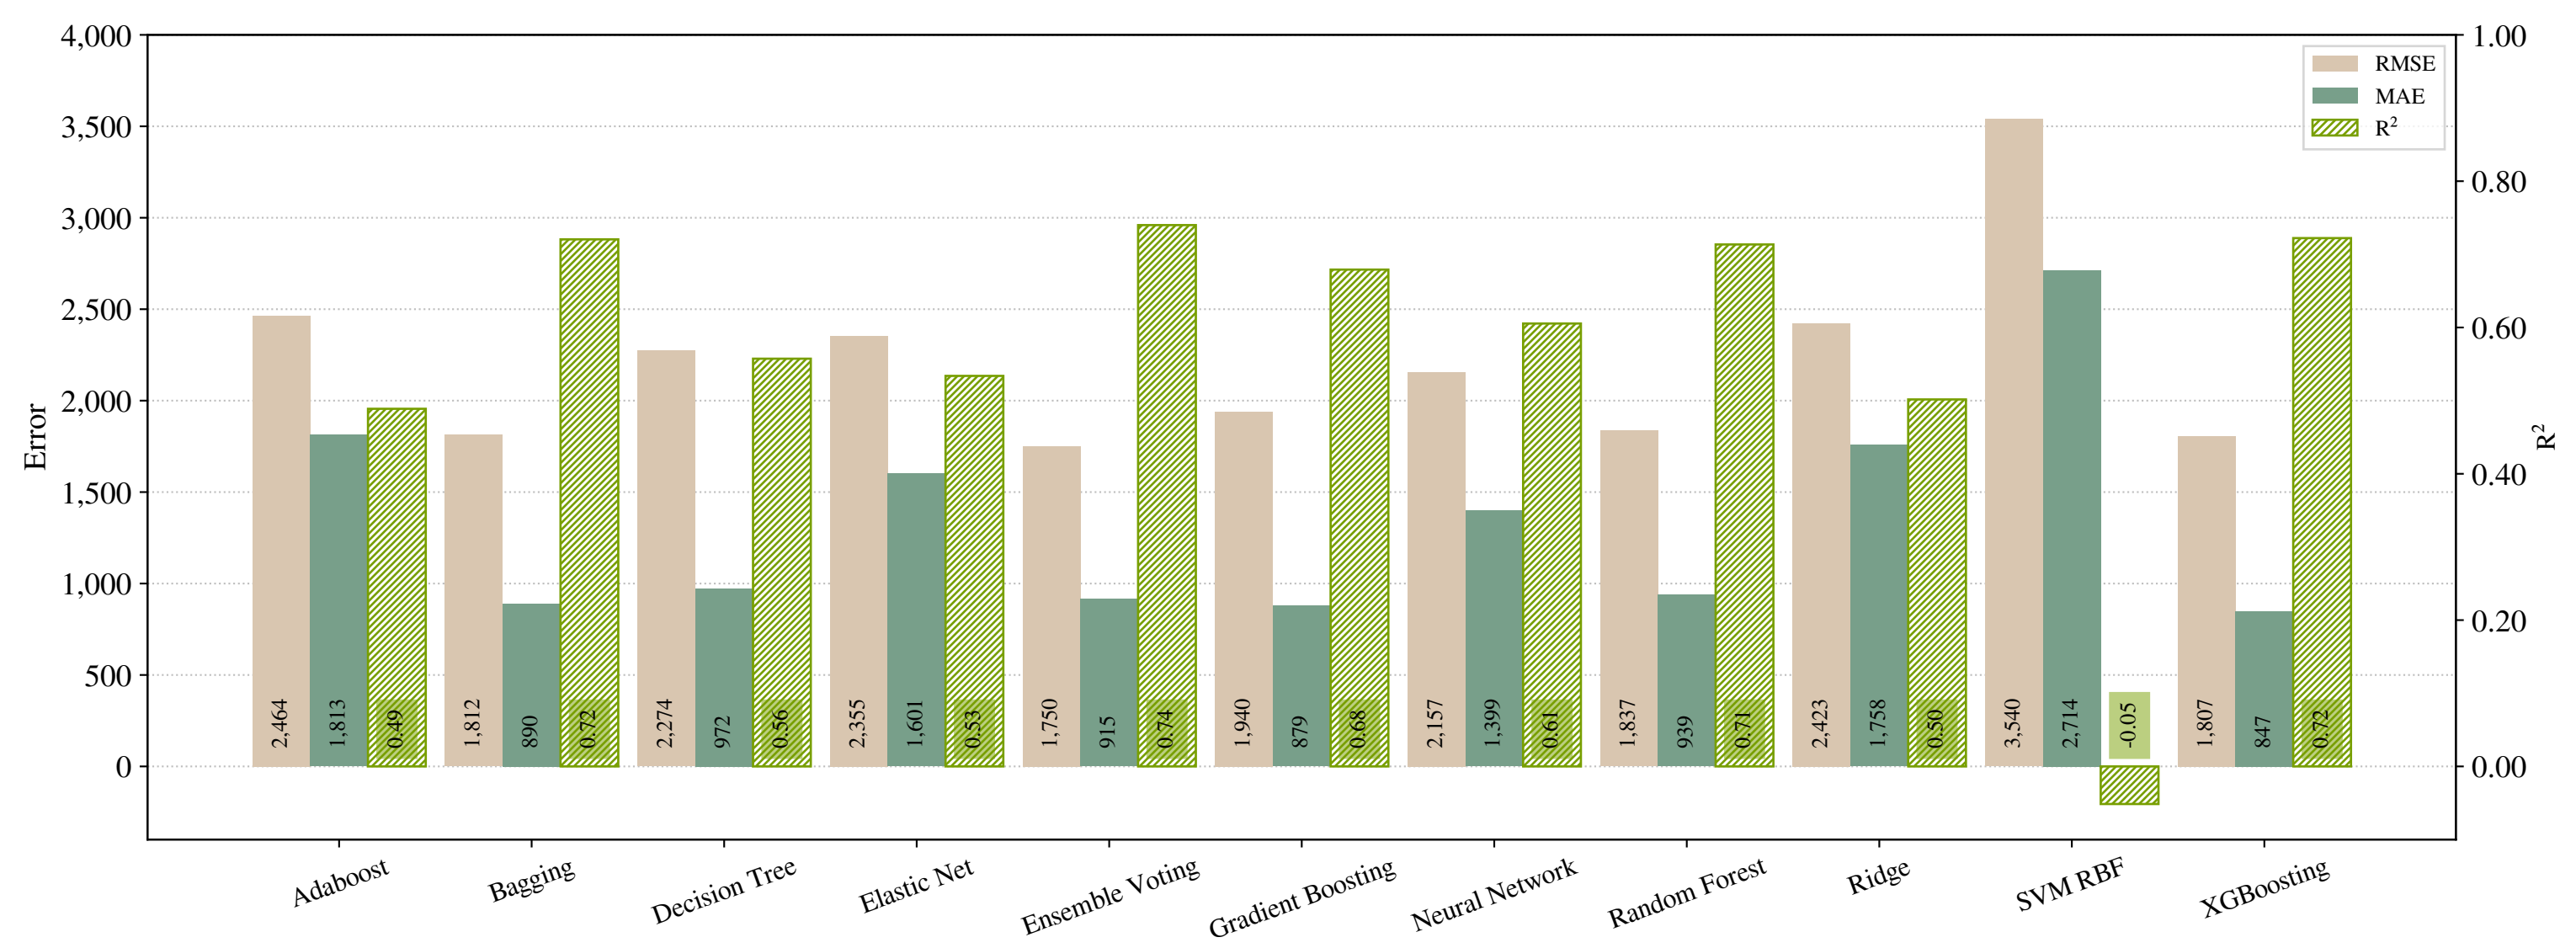

Supplement: text_regression_in_law_judgments.zip [file text_regression_in_law_judgments.zip]

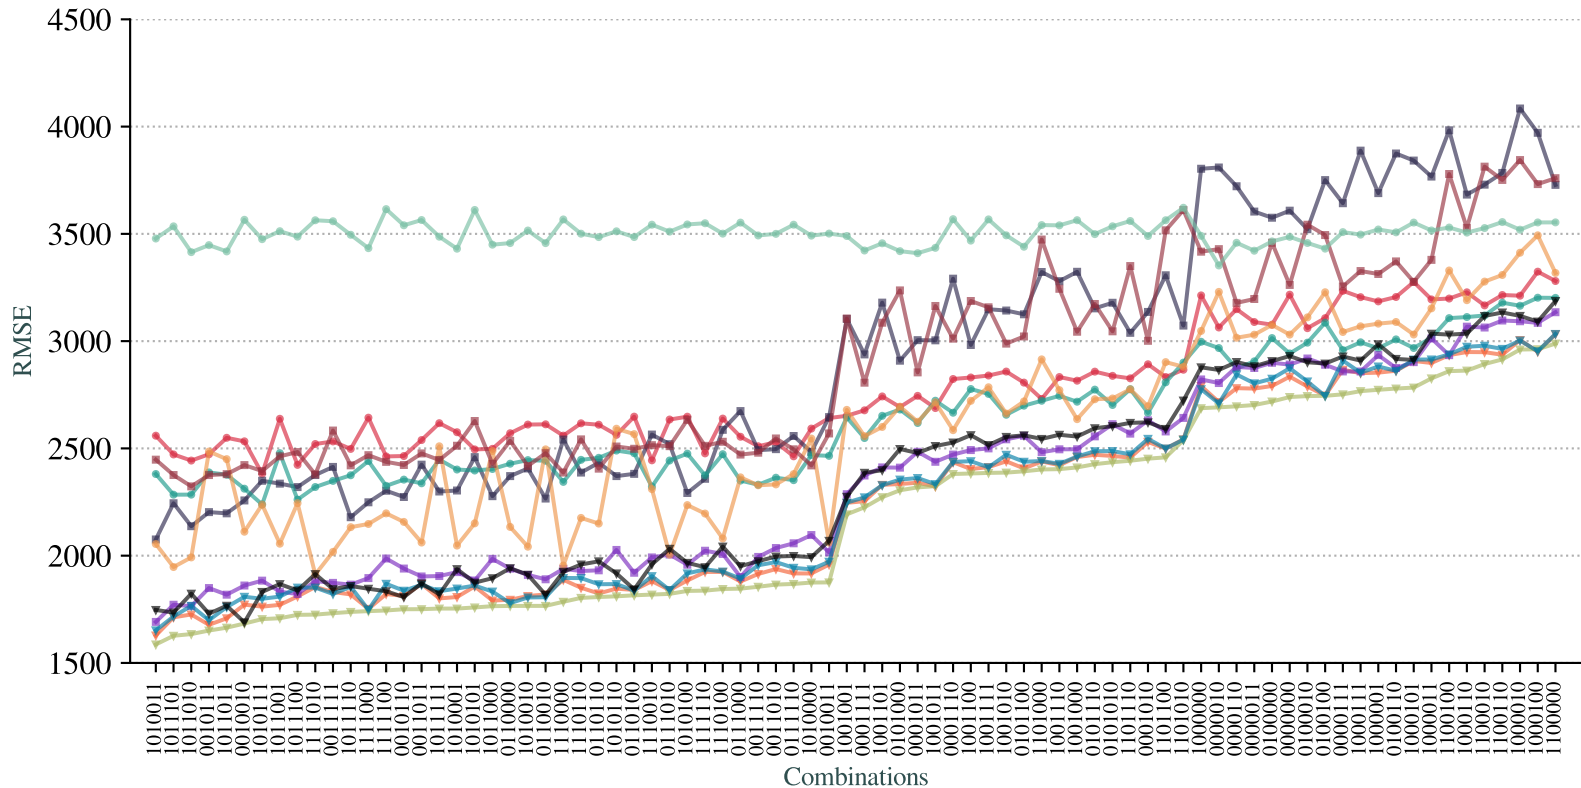

Supplement: text_regression_in_law_judgments.zip [file text_regression_in_law_judgments.zip]

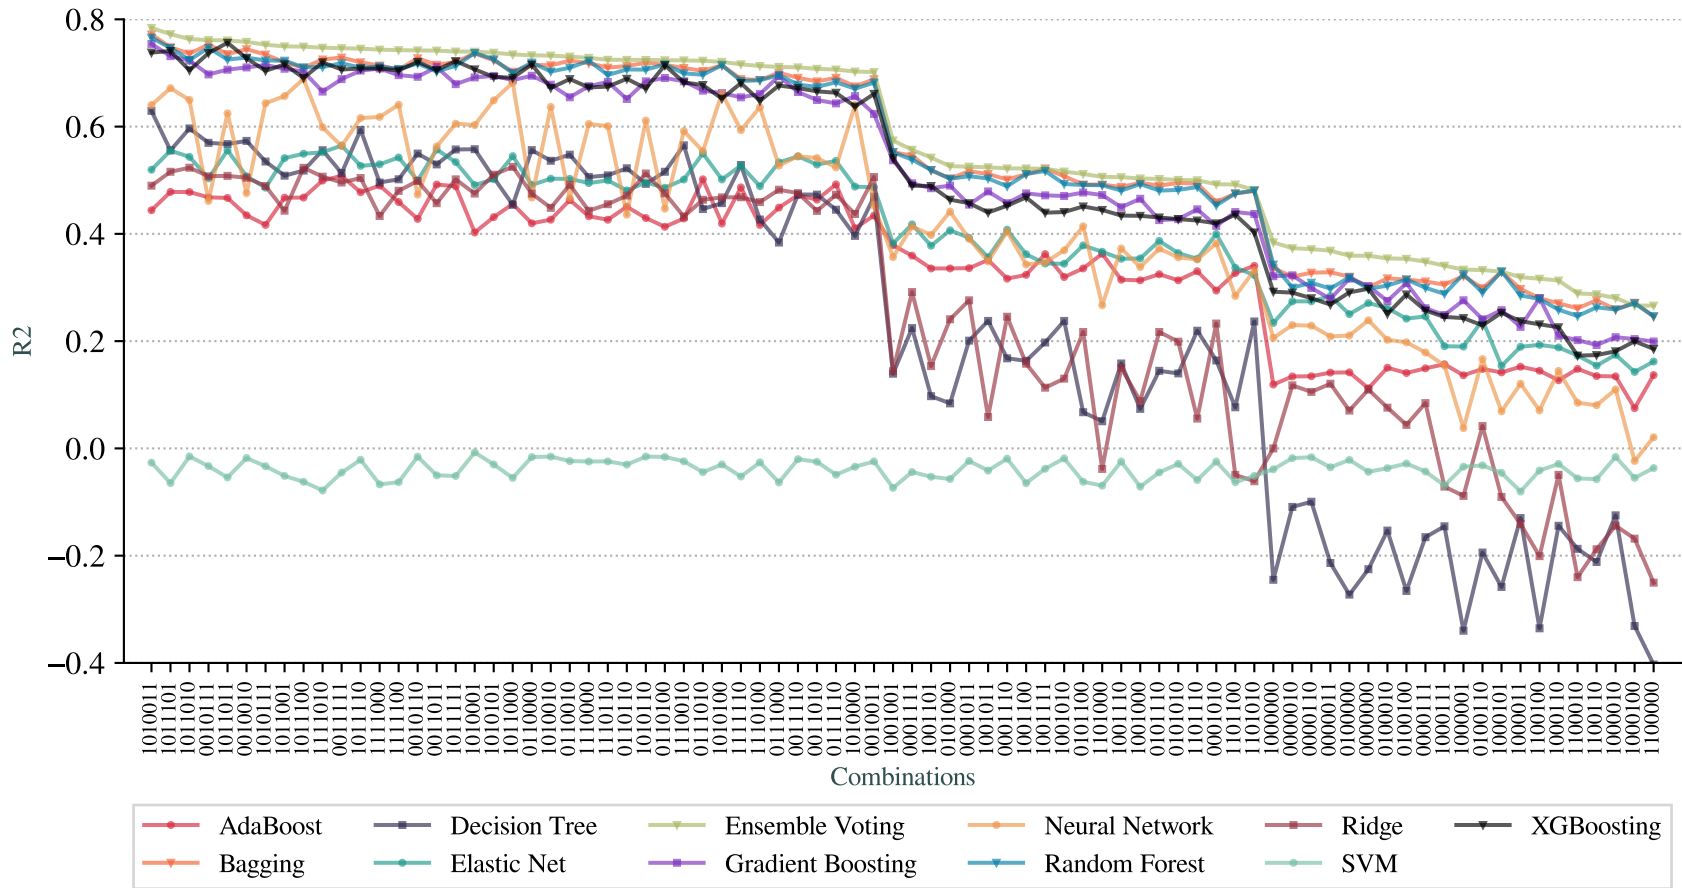

Supplement: text_regression_in_law_judgments.zip [file text_regression_in_law_judgments.zip]

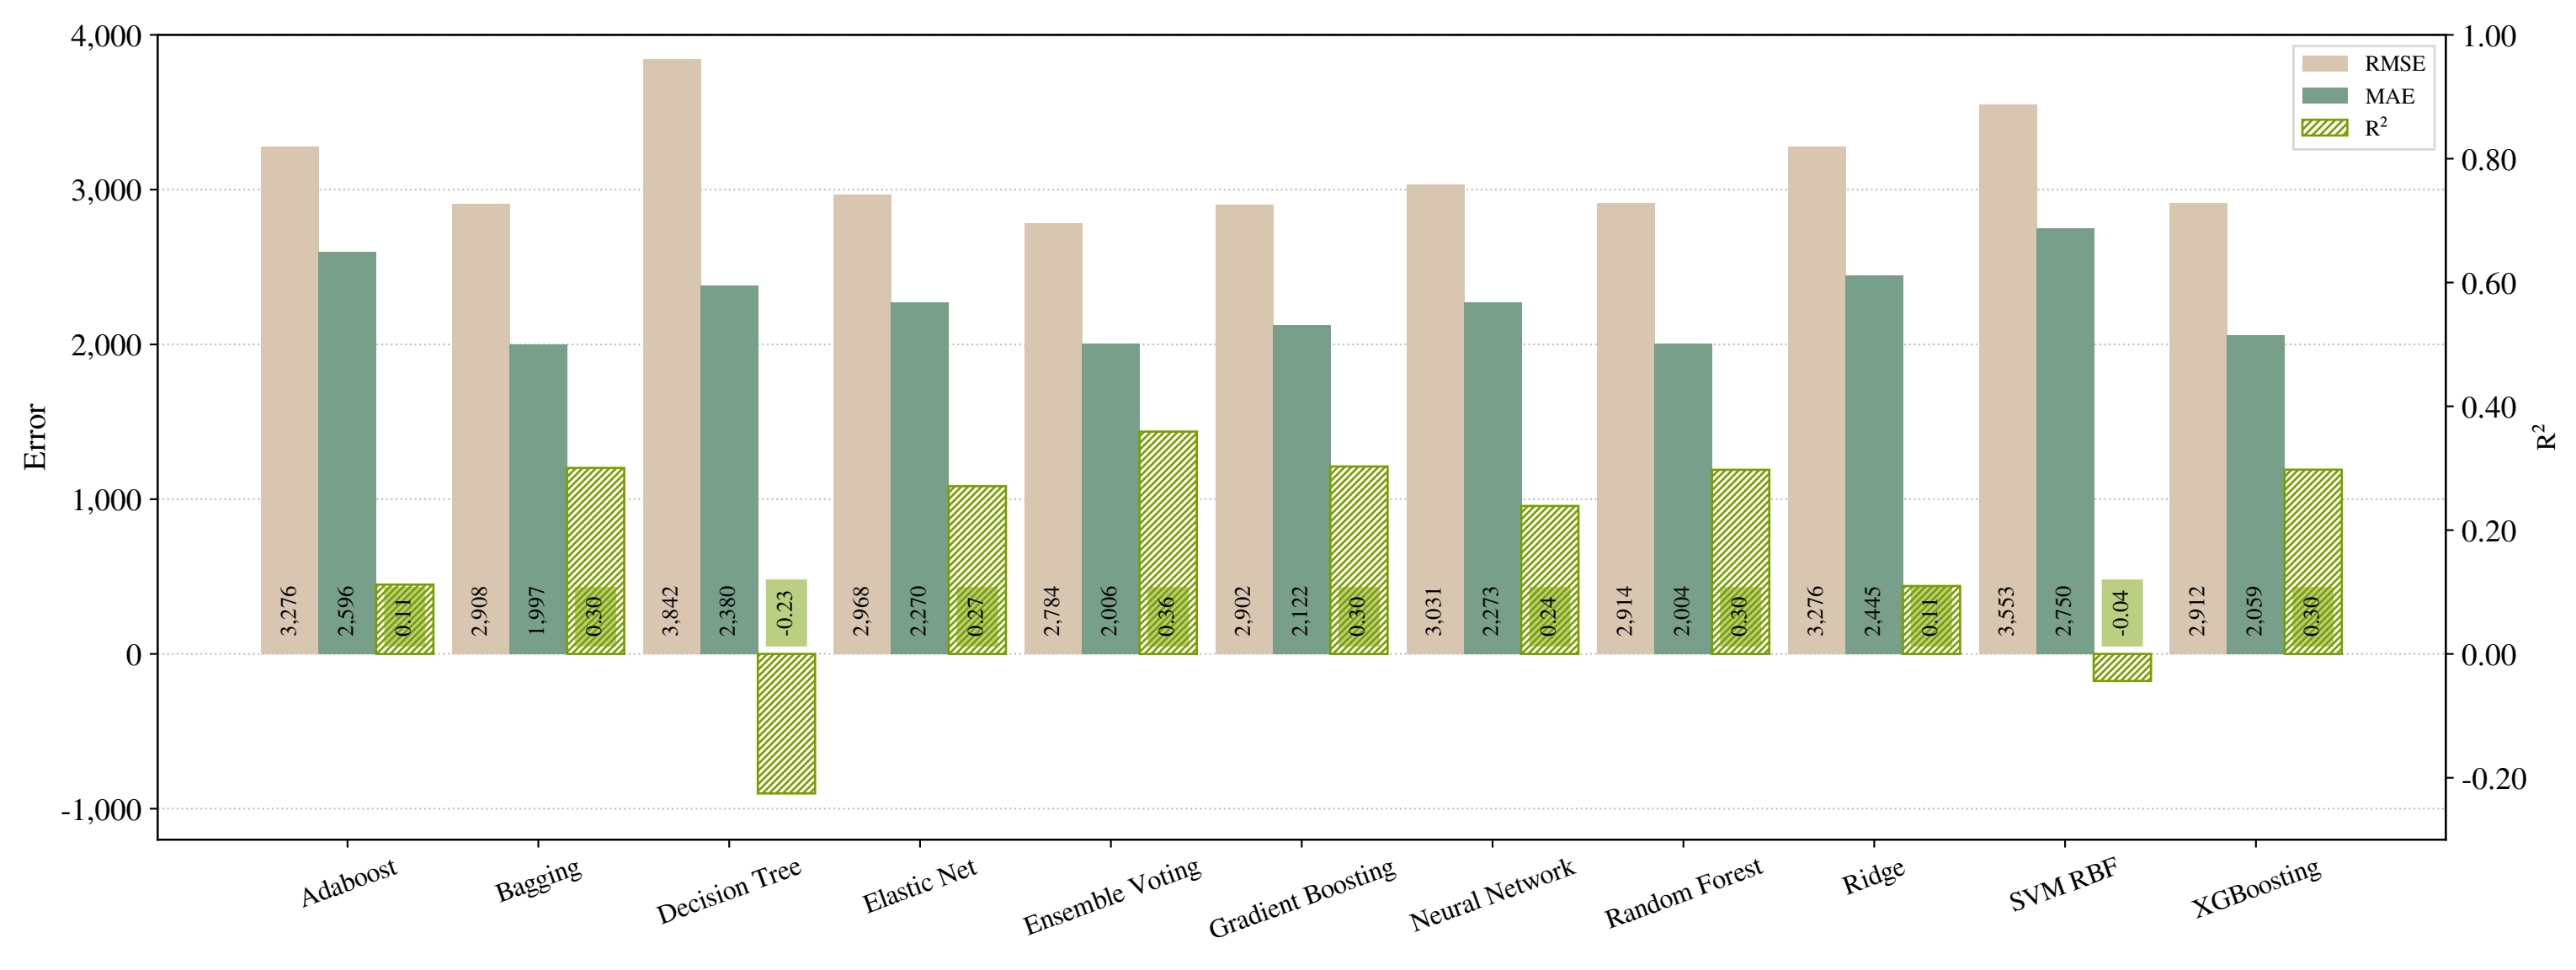

Supplement: text_regression_in_law_judgments.zip [file text_regression_in_law_judgments.zip]
